# Supplementary material for: Genomic Landscape of Copy Number Variations and Their Associations with Climatic Variables in the World’s Sheep
Source: Genes (Basel). 2023 Jun 13;14(6):1256. doi: 10.3390/genes14061256 (PMC10298528; doi:10.3390/genes14061256)
Supplement: Supplementary file 1 [file genes-14-01256-s001.zip › genes-2385246-Supplementary Tables 1-19-new.xlsx]

## Sheet: Supplementary Table S1
Supplementary Table S1. Summary information of the 47 old and native sheep populations and the environmental variables for their central range areas.
Geographic regions	Breed name	Breed code	Country	Number of Individual	Latitude (ºN)	Longitude (ºE)	Elevation(km)	DTR Yearly Mean	FRS Yearly Mean	PRCV Yearly Mean	PR Yearly Mean	RDO Yearly Mean	REH Yearly Mean	SUN Yearly Mean	TMP Yearly Mean	WND Yearly Mean	DTR-January	DTR-February	DTR-March	DTR-April	DTR-May	DTR-June	DTR-July	DTR-August	DTR-September	DTR-October	DTR-November	DTR-December	PRCV-January	PRCV-February	PRCV-March	PRCV-April	PRCV-May	PRCV-June	PRCV-July	PRCV-August	PRCV-September	PRCV-October	PRCV-November	PRCV-December	PR-January	PR-February	PR-March	PR-April	PR-May	PR-June	PR-July	PR-August	PR-September
East &Central Asia	Sishui Fur sheep	SSS	China	20	35.62	116.15	0.024	10.6583	8.35	88.325	52.7333	6.73333	62.6083	55.1	14.175	2.80833	10.1	10.3	11.5	12.1	12.5	11.9	8.8	8.8	10.3	11.2	10.6	9.8	7.6	9.3	18.6	34.1	44.2	73.5	181.5	132.9	69.6	34.1	18.2	9.2	118.6	115.5	75.3	94	84.3	80.4	53.8	58.6	78.4
	Wadi sheep	WDS	China	20	37.38	117.97	0.011	11.05	9.575	85.625	47.0667	6.95	61.2167	59.0833	12.8917	3.51667	10.7	10.9	11.9	12.7	13	12.1	9	8.9	11	11.7	10.8	9.9	5.3	7.9	10.4	30	31.5	63.9	186.7	129.5	47.7	28.5	16.9	6.5	128.8	106.6	87.3	80.6	85.5	68.5	49.3	56.9	75.5
	Hu sheep	HUS	China	20	32.44	120.25	0.019	8.5	5.93333	65.5417	88.9583	11.475	76.4333	47.4833	15.0917	3.05833	7.9	7.9	8.9	9.6	9.6	8.4	7.2	7.6	7.8	9.1	9.1	8.9	32	46.8	61.1	81	92.8	153.6	205.5	144.5	116.1	55.2	50.7	28.2	61.5	60.1	51	54.1	55.1	54.1	61.9	65.7	69.4
	Small Tailed Han sheep	SXW	China	20	35.62	116.15	0.024	10.6583	8.35	88.325	52.7333	6.73333	62.6083	55.1	14.175	2.80833	10.1	10.3	11.5	12.1	12.5	11.9	8.8	8.8	10.3	11.2	10.6	9.8	7.6	9.3	18.6	34.1	44.2	73.5	181.5	132.9	69.6	34.1	18.2	9.2	118.6	115.5	75.3	94	84.3	80.4	53.8	58.6	78.4
	Large Tailed Han sheep	HDW	China	20	35.62	116.15	0.024	10.6583	8.35	88.325	52.7333	6.73333	62.6083	55.1	14.175	2.80833	10.1	10.3	11.5	12.1	12.5	11.9	8.8	8.8	10.3	11.2	10.6	9.8	7.6	9.3	18.6	34.1	44.2	73.5	181.5	132.9	69.6	34.1	18.2	9.2	118.6	115.5	75.3	94	84.3	80.4	53.8	58.6	78.4
	Tan sheep	TAN	China	15	37.75	106.41	1.261	13.0417	13.0583	101.075	20.5333	5.14167	56.6083	62.525	8.91667	1.73333	13.4	13.6	13.7	14.6	14.2	13.7	12.3	11.7	12.2	13.2	11.8	12.1	1.4	2.4	6.3	15	22.1	24	48.6	64.5	37.7	17.6	5.9	0.9	143.5	130.2	111	92.9	80.4	69.2	58.6	65.8	70
	Celle Black Sheep	CLS	China	15	36.99	80.79	1.478	14.1	11.25	202.083	2.78333	1.35833	44.6833	59.6333	11.9917	1.94167	12.5	12.4	14	14.7	14.6	14.6	14.4	14.3	15.1	16.2	14.1	12.3	1.9	2.2	1.3	2.2	5.8	5.8	6	3.3	2.6	1.1	0.2	1	177.4	170.5	304.6	221.1	156.1	119.5	114.1	127.3	231
	Duolang sheep	DLS	China	20	38.37	77.23	1.22	13.625	10.6417	179.308	3.85	1.775	49.7417	59.4417	11.95	1.56667	11.9	11.6	13.1	14.4	14.7	15.1	14.3	14.1	15	15.8	13	10.5	1.1	2.7	1.5	4.1	9.3	7.8	5.6	7.6	2.9	1.7	1.1	0.8	151.8	158.1	275.7	225.7	123.4	120.4	107.7	148.6	162.8
	Baidarak	BAJ	Buryatia	11	50.85	105.44	1.162	12.5833	19.9083	59.1333	56.85	9.43333	66.9917	54.8167	-2.40833	2.13333	10.7	13.1	13.8	13.6	15.1	14.2	12.2	12.1	13	12.1	11	10.1	14.6	11.3	21.1	39.5	50.1	100.4	149.2	129.8	78.3	38.5	27.1	22.3	73.9	68.6	74	61.3	51.4	57.5	49.5	46	48.9
	Altay Sheep	ALS	China	15	47.48	87.43	0.485	11.9833	14.35	76.7333	11.4583	6.44167	61.15	62.2333	5.84167	2.39167	10.5	11.6	11.1	12.6	13.7	13.7	13.4	13.8	13.5	11	9.3	9.6	6	4.7	5.2	9	13.8	14.4	22.2	15.5	14.4	12.8	10.3	9.2	78.7	82.9	99	80	79.7	71.7	76.2	70	67.4
	Bashibai sheep	BSB	China	15	46.21	82.97	0.586	12.8417	14.2583	70.3083	21.5583	7.65833	63.5417	59.9833	6.75833	2.75833	11.2	11.8	10.9	13.6	14.4	14.7	14.8	15.6	15.3	12.6	9.6	9.6	13.6	14.2	16.8	27.3	28.4	27.1	30.5	17.5	14.2	23.8	26	19.3	60.3	77.2	71.7	72.8	66.2	67.1	73.6	76.4	81.7
Western Asia	Lori Bakhtiari	LRB	Iran	15	32.33	50.86	2.154	14.6417	8.95833	180.95	20.1	4.65833	37.225	71.9333	13.4583	2.19167	11.4	12.3	12.6	13.4	15.1	17.1	16.8	17.3	18.1	16.3	13.7	11.6	40.5	31.8	39.1	41.4	23.8	2.7	2.6	0.3	0	4.1	17.9	37	74.8	67.1	85.3	99.2	115.8	260.3	284.4	358.9	390.5
	Siah Kabod	SKD	Iran	15	34.64	50.88	0.956	12.95	4.96667	142.533	25.6333	5.94167	46.7583	63.55	18.2083	1.8	9.7	10.7	11.5	12.7	13.7	15.4	15.2	15.3	15.6	13.8	11.9	9.9	46.7	38.4	39	28.9	15.4	2	1.8	4.9	11.5	35.8	34.7	48.5	69.3	63.8	79.5	89.3	96.5	187.1	229.6	290.5	290.1
	Shal	SHA	Iran	15	36.27	50	1.322	11.6833	8.44167	109.075	50.85	8.575	56.725	54.8083	12.8333	1.95	9.2	9.4	9.9	11.2	12.3	14.1	14	13.9	14.1	12.3	10.6	9.2	63.1	54.4	61.6	50.3	41.8	20.1	15.4	26.5	46.6	90.9	70.3	69.2	61.7	61.6	67.4	68.8	75.8	149.4	206.6	212.6	177.3
	Sanjabi	SAN	Iran	14	34.31	47.07	1.589	16.45	10	165.883	38.6167	6.43333	47.0667	64.7417	13.0167	2.43333	10.9	11.9	13	14.4	17.2	21.4	21.3	21.3	21.7	18.3	14.7	11.3	64.5	61.7	86.6	72.6	37.8	1.8	1	0.2	0.5	21.7	49.3	65.7	68.5	65.5	74.6	70.4	103.9	307.6	345.6	302.2	326.1
	Ghezel	GHE	Iran	15	38.07	46.3	1.426	11.25	9.96667	88.9333	27.4833	8.24167	54.325	60.2083	11.75	2.55833	8	8.5	9.9	11	12.1	13.6	13.6	13.7	14.2	12.2	10.1	8.1	26.6	26.4	48.4	55.6	45.2	20.6	5.2	5.8	10.3	29.6	29.2	26.9	60.4	63.3	61.8	49.9	62.8	98.9	154.2	146.2	118.4
	Afshari	AFS	Iran	14	36.67	48.48	1.72	13.7667	11.6917	117.858	29.325	7.63333	53.4	60.05	10.3583	1.81667	10.1	10.5	11.3	13	14.8	17.2	17	17.1	17.8	14.8	11.8	9.8	36.2	32.6	48.9	58.2	48.6	10.1	6.2	6	8.1	31.7	32.9	32.4	66.1	66.9	69.8	60.9	71.5	161.7	226	215	207.7
	Mazekh	MAZ	Azerbaijan	11	40.58	46.33	0.674	10.1333	7.71667	66.5	38.7167	6.025	60.925	49.5	12.5417	1.85	8.2	8.1	9.4	11.1	11.1	11.6	12	11.8	11.2	10.1	9	8	15.5	23.8	38.6	52.3	74.8	70.5	39.1	31.8	30.8	45	24.5	17.9	68.2	62.1	53	47.2	43.3	50.6	77.3	84.4	86
	Kermani	KER	Iran	15	30.12	55.12	1.804	16.7667	7.35833	195.3	15.3333	3.11667	35.575	71.2583	16.2333	2.95833	14.4	14.5	14.6	15.5	16.9	18.3	17.3	18.1	19.3	18.9	17.8	15.6	38.1	31.5	35.6	25.3	10.8	1	1.7	1.1	0.2	1.5	9.3	27.9	84.1	81.4	88.2	113.3	152.8	302.7	266.8	381.5	356.3
	Baluchi	BAL	Iran	12	27.58	58.94	0.355	13.4583	1.29167	238.158	9.60833	1.69167	46.45	71.3833	25.7583	2.49167	12.6	12.1	12.8	13.4	14.4	13.8	12.2	12.5	13.9	15.1	15.1	13.6	28.1	31.5	21.9	7	2.6	0.3	3.3	2	0.8	0.9	3.1	13.8	106.7	104.8	121	153.5	254.3	373.6	295.1	403.1	416.3
	Karakul	KAR	Iran	15	36.55	61.16	0.271	13.9417	5.73333	202.425	15.4333	4.51667	48.0333	64.8917	17.4583	2.78333	10.5	10.9	11.7	13.3	15.3	16.3	15.9	16.1	16.9	15.6	13.8	11	30.6	28.9	37.4	30.7	11.4	0.5	0	0.1	0.8	6.7	13.2	24.9	72.1	68.9	61.1	71.3	105.7	382.5	455.6	446.8	419
	Bozakh	BOZ	Azerbaijan	10	40.53	46.02	1.408	10.5333	11.5417	60.875	53.0833	7.95	59.4167	51.6	9.34167	1.775	8.2	8.2	9.4	11	11.2	12.1	12.7	12.6	12.4	11	9.6	8	22.4	31.1	51.9	72.8	103.8	93.4	58.3	48.1	45.2	52	34.2	23.8	60.7	61.8	45.7	39.8	40.6	46.1	67.2	75.3	77.9
Africa	Afar sheep	AFA	Ethiopia	18	9.51	40.02	0.848	14.0583	0	105.867	48.2333	4.38333	63.9417	70.4167	26.1917	1.29167	14.5	14.5	14.1	13.8	14	14.1	13.2	12.5	13	14.6	15.3	15.1	18.9	33.5	50.7	49.2	37.3	24.8	126.5	149.5	54.9	17.7	10.5	5.3	166.7	123.9	87.2	74	84	91.4	46	38.3	59.5
	Bonga	BQS	Ethiopia	11	7.27	36.25	1.858	13.125	0.708333	54.9667	133.042	8.525	56.0583	65.2	18.4	1.40833	16.6	15.9	14.9	13.4	12	10.8	9.3	9.8	11	12.9	14.6	16.3	38.9	57.9	106	142	187	192.5	206.3	207.4	186.5	136	98.5	37.5	90.2	78.3	53.2	46.7	36.7	32.8	30.1	32.4	34.1
	Menz	MZS	Ethiopia	12	10.12	39.66	2.669	14.1917	2.44167	88.1083	103.075	7.625	60.8583	65.7583	14.75	1.46667	15.7	15	14.6	13.6	14.5	14.2	11.9	11.5	12.6	14.8	15.8	16.1	27	47.3	80.4	106.6	88.6	76.5	271.6	289.4	161.3	49.1	22.1	17	151.3	109.7	75	60.1	67.2	68.5	30.3	24.1	30.5
	Uda sheep	UDA	West Africa	12	4.39	9.29	0.47	7.69167	0.508333	53.475	252.192	17.3583	81.275	37.1167	24.3917	1.43333	9.4	9.4	8.9	8.5	8	6.9	5.6	5.4	6.7	7.1	7.8	8.6	25.1	56.7	148	199.6	245.6	355.6	528.6	540.1	452.8	332.1	116.3	25.8	101	86.1	43.3	32	32.4	43.9	39.8	35.8	26.6
	West African dwarf	WAD	West Africa	11	6.84	7.37	0.379	9.9	0.416667	86.0917	130.842	8.76667	73.625	46.7417	25.7417	2.43333	13.5	12.4	10.9	9.8	8.8	7.9	7.1	7.1	8	8.9	11.2	13.2	8.7	22.1	67.2	126	193.5	186.5	226.2	202.5	293.8	201	30.9	11.7	197.5	147.7	74	47	33.3	33.5	40.4	53.7	29.3
	Mbororo sheep	MBO	West Africa	14	5.96	10.16	1.758	9.46667	1.49167	68.0583	185.442	15.7333	71.3583	46.4917	18.15	1.95	12	11.5	10	11.7	8.6	8.2	7.2	7	7.9	8.5	9.7	11.3	11.1	34.2	136.6	183.1	167.4	243.7	376.4	379.5	404.6	226.5	48	14.2	173.7	119.6	54.6	32.1	38.9	28.1	23.5	25.6	20.2
	Libyan barbary sheep	LBR	Libya	13	32.32	15.1	0.021	8.61667	0.158333	180.633	19.525	3.55833	64.4417	73.2333	20.2167	3.03333	7.8	8.4	8.6	9.2	9.4	9.3	8.5	8.7	8.8	8.3	8.5	7.9	47.4	20.6	17.9	8.5	3	0.7	0	0.2	10.8	33.5	34.8	56.9	83.9	94.3	105.1	158.6	202.6	271	425.8	417.3	155.2
Europe	Carpathian Mountain	MKS	Ukraine	13	48.55	23.01	0.508	9.075	11.575	52.6167	64.6917	13.65	77.75	39.3083	7.40833	3.04167	6.9	7.2	8.7	10.1	10.8	10.6	10.9	11.1	10.5	9.8	6.5	5.8	47.5	42.7	45	55.2	82.1	104.9	94.3	83.9	56.3	48.4	54.5	61.5	53.8	58	62.6	44.4	43	41.8	44.3	46.4	61.5
	Pramenka	PRA	Serbia	13	44.74	20.44	0.13	9.28333	7.76667	58.95	57.2917	10.8917	69.35	43.0583	11.9083	2.46667	6	7	9.2	10.2	10.8	10.6	11.5	11.8	11.3	10.1	7.2	5.7	46.8	44	45.5	56.3	70.6	91	66.7	53.4	51.3	46	57	58.9	60.1	66.1	61.5	35.7	58.1	49.7	59.4	70.2	62.7
	Caucasian	CAU	Russia	15	45.71	42.88	0.13	9.85	10.0333	63.9333	34.725	10.875	71.4417	45	10.025	4.28333	7	7.4	8.3	11.4	12	12.1	12.3	12.4	11.8	10.1	7.2	6.2	26.4	21.4	22.8	32.2	43.9	59	44.4	41.8	30.1	28.2	33.1	33.4	61.8	66.7	55.9	66.4	60.8	56.3	67.5	79.5	68.5
	Altamurana	ALT	Italy	15	40.9988	16.1683	0.451	8.48333	3.15833	73.4917	50.175	8.76667	70.1417	53.3167	13.5083	3.75833	6.4	6.9	7.8	8.8	9.7	10.1	10.6	10.3	9.5	8	7.3	6.4	66.5	74	60.4	69.4	68.2	91.5	103.7	84.1	77.6	67.6	67	51.9	57.7	54.2	51.4	47.6	41.6	38.1	27.5	34.8	53
	Leccese	LEC	Italy	15	40.4201	18.2255	0.022	8.55	1.20833	85.1667	56.65	9.30833	73.6167	54.3417	16.5	3.375	7.1	7.3	7.9	8.8	9.7	10	10.3	9.9	9.2	8	7.4	7	70	81	65.6	81.9	77.2	101.4	143.9	110.9	85.2	72.9	77.2	54.8	81.4	64.7	72.7	43.2	32.3	22.1	16.3	31.5	56.9
	Solognote	SOL	France	10	47.6	1.33	0.103	8.88333	4.425	57.25	54.0833	13.8167	81.2833	38.525	11.0167	4.15833	5.6	6.7	8.4	9.7	10.1	10.7	11.8	11.6	10.9	9	6.7	5.4	58.8	53.8	49.3	48.5	59.3	52.4	47.6	51.2	53.3	53.2	63.9	57.7	49.6	63.4	53.8	56.6	53.1	52.4	57.7	61.9	61.7
	Rhoen sheep	RHS	Germany	15	50.58	8.68	0.217	7.81667	8.05	52.9667	55.875	14.6167	77.9417	32.0583	8.85833	2.9	4.6	5.8	7.6	9.2	9.9	9.9	10	10.1	9.5	7.6	5.1	4.5	46.4	40.7	45.5	50.3	61	74	68.4	67.8	51.8	49.2	58.7	56.7	45	63.8	49	47.3	44.9	50.7	51.2	52.3	62.1
	Brown Mountain sheep	BBS	Germany	14	47.49	11.09	1.472	7.60833	15.1333	54.3	89.2083	16.5167	73.3167	40.6583	4.225	3.23333	6.5	6.9	7.4	7.9	8.5	8.7	9	8.4	8.2	7.4	6.2	6.2	62.7	57.8	64.8	80.7	110.6	132	141.8	134.8	88.8	61.5	69.4	65.6	61.9	70	58.4	46	42.9	35.2	37.9	42	58.7
	Ouessant	OUE	France	15	46.7636	2.41224	0.18	9.41667	4.91667	55.3917	60.6417	14.0167	79.1	39.4167	11.05	4.19167	6.2	7.5	9.1	10.1	10.5	11.1	12.3	11.9	11.4	9.5	7.2	6.2	60.1	56.7	55.4	50.7	79.3	62.8	51.7	67	63.4	57.3	60.9	62.4	46.7	59.9	54.7	56.4	46.2	53.5	59.5	59.1	63.9
	Suffolk sheep	SFK	England	15	52.1872	0.97078	0.053	7.91667	9.46667	51.475	49.375	14.2833	84.7667	32.7167	9.33333	4.76667	5.5	5.9	7.5	8.5	9.5	9.9	9.8	10	9.1	7.5	6.3	5.5	51.5	35.7	45.1	44.9	46.3	49.8	49.8	49.4	51.4	54.7	59.8	54.1	45.9	54	52.6	47.5	51.4	54.8	54.1	47.5	58.9
	Texel sheep	TEX	Netherlands	19	53.0996	4.80867	0.002	5.575	5.70833	50.6667	63.65	16.4167	84.0083	32.525	9.21667	6.05	4.3	4.4	5.3	6.1	6.7	6.5	6.1	6.5	6.3	5.7	4.8	4.2	65.9	41.6	51.3	43	43.7	46.6	65.5	63.4	83.7	84.9	94.5	79.7	45	55.4	43.9	51.3	52.8	53.8	55.9	55.4	54.6
	Kuibyshev	KUI	Russia	14	52.84	49.02	0.061	8.7	14.2417	62.975	39.4833	12.3917	74.675	41.675	5.28333	3.65833	7	7.5	7	9.6	11.3	11.3	10.9	11.2	10.2	7.5	4.9	6	36	26.1	24.2	31.1	31.5	57	58.1	44.6	42.2	40.6	43	39.4	50.1	72.5	74.3	73.2	69.2	56.8	56.5	59.7	71.6
	Shetland	SHL	Scotland	11	60.33	-1.16	0.037	4.6	7.6	39.9417	98.6167	21.3167	88.325	21.0083	7.20833	6.975	4.2	4.1	4.6	5.2	5	5.2	4.9	4.9	4.5	4.1	4.2	4.3	131.1	90.6	111.3	70.8	58.6	58	60.4	76	115.4	132.5	141	137.7	32.6	48.3	42.5	43.2	44.4	45.1	42.4	44.7	34.3
	East Friesian sheep	EFR	Germany	19	53.47	7.49	0.002	7.45	7.46667	48.225	64.9667	16.4	84.75	30.0333	8.99167	4.525	4.8	5.5	6.7	8.8	9.7	9.5	9	9.6	8.6	7.1	5.4	4.7	62.1	44.6	50.9	45.6	57.2	69.7	82.2	80	72.4	67.8	77.9	69.2	47	56.7	43.9	54.2	48.4	41.5	46	48.3	53.2
	Icelandic sheep	ICE	Iceland	18	66.064	-16.4445	0.104	5.99167	17.1917	55.55	55.1833	16.5833	81.35	19.25	1.41667	4.83333	6	6	6.1	6.2	6.1	6.5	6.4	6.2	5.7	5	5.6	6.1	53.5	66	62.7	49	70.4	63.8	52.8	53.6	54.6	47.3	47.8	45.1	60.6	45	52.9	39.5	30.4	43.6	55.9	60.7	68.3
	Finnsheep	FIN	Finland	20	61.4978	23.761	0.113	8.25	16.525	50.0917	47.4917	16.575	80.7833	27.9417	3.425	3.08333	6.7	7.3	8.5	8.8	11.7	11.7	10.6	9.6	7.6	5.7	4.7	6.1	42.3	59.5	55.2	57.9	48.1	59.2	51	47.7	44.9	50.8	42.3	42.2	35.8	26.7	27.4	32.7	38.2	50	72.3	77	59.2
	Romanov sheep	ROM	Russia	10	56.8638	35.9591	0.136	8.15	14.4917	50.8583	49.975	16.3083	82.5167	33.725	4.31667	2.95833	6.6	7.5	7.9	9	11.3	10.9	10.2	9.8	8.5	6.1	4.4	5.6	53	64.3	53.2	53.1	49.9	47.5	48.3	53	48.9	51	45.5	42.6	30.6	25.7	27.4	36.7	53.6	71.4	86.2	72.8	55.7
	Gotland	GOL	Sweden	11	57.492	18.413	0.037	5.21667	9.95833	57.2833	42.1667	13.7833	84.4583	31.2417	7.06667	5.725	3.5	3.8	4.7	6.1	7.6	7.5	6.5	6.1	5.3	4.4	3.5	3.6	47.5	29.5	31.6	28.5	30.1	31.4	50.2	50.2	55.4	47.7	53.8	50.1	49.2	55.5	59.1	59.6	68	61	63.8	58.2	53.8
[truncated: 75 more columns]

## Sheet: Supplementary Table S2
Supplementary Table S2. The average of extraterrestrial solar radiation of each geographic region for old and native sheep populations.
Breed code	Month	Average day of month	H bar (average of extraterrestrial solar radiation)
AFS	Jan	(N=17)	17.18
	Feb	(N=47)	22.31
	Mar	(N=75)	28.79
	Apr	(N=105)	35.31
	May	(N=135)	39.73
	Jun	(N=162)	41.46
	Jul	(N=198)	40.52
	Aug	(N=228)	36.95
	Sep	(N=258)	31.09
	Oct	(N=288)	24.17
	Nov	(N=318)	18.36
	Dec	(N=344)	15.75
	Average		29.3
BBS	Jan	(N=17)	8.35
	Feb	(N=47)	13.85
	Mar	(N=75)	21.74
	Apr	(N=105)	30.9
	May	(N=135)	38.11
	Jun	(N=162)	41.33
	Jul	(N=198)	39.72
	Aug	(N=228)	33.69
	Sep	(N=258)	25.03
	Oct	(N=288)	16.14
	Nov	(N=318)	9.61
	Dec	(N=344)	6.97
	Average		23.7866
BAJ	Jan	(N=17)	8.54
	Feb	(N=47)	14.05
	Mar	(N=75)	21.92
	Apr	(N=105)	31.02
	May	(N=135)	38.16
	Jun	(N=162)	41.35
	Jul	(N=198)	39.75
	Aug	(N=228)	33.78
	Sep	(N=258)	25.18
	Oct	(N=288)	16.33
	Nov	(N=318)	9.81
	Dec	(N=344)	7.15
	Average		23.92
FIN	Jan	(N=17)	1.23
	Feb	(N=47)	5.68
	Mar	(N=75)	13.92
	Apr	(N=105)	25.26
	May	(N=135)	35.57
	Jun	(N=162)	40.81
	Jul	(N=198)	38.24
	Aug	(N=228)	29.26
	Sep	(N=258)	17.93
	Oct	(N=288)	7.99
	Nov	(N=318)	2.13
	Dec	(N=344)	0.45
	Average		18.2058
OUE	Jan	(N=17)	11
	Feb	(N=47)	16.51
	Mar	(N=75)	24.06
	Apr	(N=105)	32.44
	May	(N=135)	38.78
	Jun	(N=162)	41.52
	Jul	(N=198)	40.13
	Aug	(N=228)	34.88
	Sep	(N=258)	27.06
	Oct	(N=288)	18.7
	Nov	(N=318)	12.28
	Dec	(N=344)	9.57
	Average		25.58
ICE	Jan	(N=17)	1.13
	Feb	(N=47)	5.53
	Mar	(N=75)	13.77
	Apr	(N=105)	25.14
	May	(N=135)	35.53
	Jun	(N=162)	40.83
	Jul	(N=198)	38.23
	Aug	(N=228)	29.17
	Sep	(N=258)	17.79
	Oct	(N=288)	7.84
	Nov	(N=318)	2.02
	Dec	(N=344)	0.38
	Average		18.1133
ALS	Jan	(N=17)	10.57
	Feb	(N=47)	16.08
	Mar	(N=75)	23.69
	Apr	(N=105)	32.2
	May	(N=135)	38.68
	Jun	(N=162)	41.5
	Jul	(N=198)	40.07
	Aug	(N=228)	34.7
	Sep	(N=258)	26.74
	Oct	(N=288)	18.29
	Nov	(N=318)	11.84
	Dec	(N=344)	9.14
	Average		25.291
ALT	Jan	(N=17)	14.46
	Feb	(N=47)	19.81
	Mar	(N=75)	26.8
	Apr	(N=105)	34.17
	May	(N=135)	39.43
	Jun	(N=162)	41.59
	Jul	(N=198)	40.45
	Aug	(N=228)	36.16
	Sep	(N=258)	29.43
	Oct	(N=288)	21.83
	Nov	(N=318)	15.7
	Dec	(N=344)	13.01
	Average		27.736
BAL	Jan	(N=17)	22.58
	Feb	(N=47)	27.07
	Mar	(N=75)	32.3
	Apr	(N=105)	37.02
	May	(N=135)	39.76
	Jun	(N=162)	40.65
	Jul	(N=198)	40.09
	Aug	(N=228)	37.94
	Sep	(N=258)	33.91
	Oct	(N=288)	28.53
	Nov	(N=318)	23.59
	Dec	(N=344)	21.26
	Average		32.06
BOZ	Jan	(N=17)	14.82
	Feb	(N=47)	20.15
	Mar	(N=75)	27.08
	Apr	(N=105)	34.33
	May	(N=135)	39.48
	Jun	(N=162)	41.58
	Jul	(N=198)	40.47
	Aug	(N=228)	36.27
	Sep	(N=258)	29.66
	Oct	(N=288)	22.15
	Nov	(N=318)	16.05
	Dec	(N=344)	13.37
	Average		27.9508
BQS	Jan	(N=17)	33.08
	Feb	(N=47)	35.32
	Mar	(N=75)	37.12
	Apr	(N=105)	37.56
	May	(N=135)	36.73
	Jun	(N=162)	35.97
	Jul	(N=198)	36.16
	Aug	(N=228)	36.97
	Sep	(N=258)	37.06
	Oct	(N=288)	35.66
	Nov	(N=318)	33.49
	Dec	(N=344)	32.27
	Average		35.61
BSB	Jan	(N=17)	11.34
	Feb	(N=47)	16.83
	Mar	(N=75)	24.33
	Apr	(N=105)	32.63
	May	(N=135)	38.86
	Jun	(N=162)	41.54
	Jul	(N=198)	40.17
	Aug	(N=228)	35.02
	Sep	(N=258)	27.3
	Oct	(N=288)	19.01
	Nov	(N=318)	12.61
	Dec	(N=344)	9.9
	Average		25.8
CAU	Jan	(N=17)	11.64
	Feb	(N=47)	17.13
	Mar	(N=75)	24.58
	Apr	(N=105)	32.79
	May	(N=135)	38.92
	Jun	(N=162)	41.55
	Jul	(N=198)	40.21
	Aug	(N=228)	35.14
	Sep	(N=258)	27.52
	Oct	(N=288)	19.29
	Nov	(N=318)	12.91
	Dec	(N=344)	10.2
	Average		25.99
CLS	Jan	(N=17)	18.78
	Feb	(N=47)	23.75
	Mar	(N=75)	29.89
	Apr	(N=105)	35.9
	May	(N=135)	39.83
	Jun	(N=162)	41.31
	Jul	(N=198)	40.48
	Aug	(N=228)	37.33
	Sep	(N=258)	32
	Oct	(N=288)	25.51
	Nov	(N=318)	19.92
	Dec	(N=344)	17.37
	Average		30.1725
DLS	Jan	(N=17)	16.14
	Feb	(N=47)	21.37
	Mar	(N=75)	28.05
	Apr	(N=105)	34.9
	May	(N=135)	39.64
	Jun	(N=162)	41.53
	Jul	(N=198)	40.52
	Aug	(N=228)	36.67
	Sep	(N=258)	30.48
	Oct	(N=288)	23.29
	Nov	(N=318)	17.35
	Dec	(N=344)	14.7
	Average		28.72
HDW	Jan	(N=17)	17.81
	Feb	(N=47)	22.89
	Mar	(N=75)	29.23
	Apr	(N=105)	35.55
	May	(N=135)	39.78
	Jun	(N=162)	41.41
	Jul	(N=198)	40.51
	Aug	(N=228)	37.11
	Sep	(N=258)	31.46
	Oct	(N=288)	24.71
	Nov	(N=318)	18.98
	Dec	(N=344)	16.39
	Average		29.66
EFR	Jan	(N=17)	9.15
	Feb	(N=47)	14.67
	Mar	(N=75)	22.47
	Apr	(N=105)	31.39
	May	(N=135)	38.33
	Jun	(N=162)	41.4
	Jul	(N=198)	39.86
	Aug	(N=228)	34.07
	Sep	(N=258)	25.67
	Oct	(N=288)	16.93
	Nov	(N=318)	10.43
	Dec	(N=344)	7.75
	Average		24.3433
AFA	Jan	(N=17)	32.23
	Feb	(N=47)	34.72
	Mar	(N=75)	36.86
	Apr	(N=105)	37.7
	May	(N=135)	37.19
	Jun	(N=162)	36.57
	Jul	(N=198)	36.7
	Aug	(N=228)	37.25
	Sep	(N=258)	36.96
	Oct	(N=288)	35.17
	Nov	(N=318)	32.71
	Dec	(N=344)	31.36
	Average		35.4516
GHE	Jan	(N=17)	16.32
	Feb	(N=47)	21.54
	Mar	(N=75)	28.18
	Apr	(N=105)	34.97
	May	(N=135)	39.66
	Jun	(N=162)	41.52
	Jul	(N=198)	40.52
	Aug	(N=228)	36.72
	Sep	(N=258)	30.59
	Oct	(N=288)	23.45
	Nov	(N=318)	17.53
	Dec	(N=344)	14.89
	Average		28.82
GOL	Jan	(N=17)	1.89
	Feb	(N=47)	6.6
	Mar	(N=75)	14.88
	Apr	(N=105)	25.96
	May	(N=135)	35.85
	Jun	(N=162)	40.76
	Jul	(N=198)	38.36
	Aug	(N=228)	29.81
	Sep	(N=258)	18.81
	Oct	(N=288)	8.94
	Nov	(N=318)	2.89
	Dec	(N=344)	0.97
	Average		18.81
HUS	Jan	(N=17)	19.73
	Feb	(N=47)	24.59
	Mar	(N=75)	30.52
	Apr	(N=105)	36.21
	May	(N=135)	39.85
	Jun	(N=162)	41.18
	Jul	(N=198)	40.42
	Aug	(N=228)	37.52
	Sep	(N=258)	32.51
	Oct	(N=288)	26.28
	Nov	(N=318)	20.84
	Dec	(N=344)	18.34
	Average		30.66
KAR	Jan	(N=17)	17.25
	Feb	(N=47)	22.38
	Mar	(N=75)	28.84
	Apr	(N=105)	35.34
	May	(N=135)	39.74
	Jun	(N=162)	41.46
	Jul	(N=198)	40.52
	Aug	(N=228)	36.97
	Sep	(N=258)	31.14
	Oct	(N=288)	24.24
	Nov	(N=318)	18.43
	Dec	(N=344)	15.82
	Average		29.34
KER	Jan	(N=17)	21.1
	Feb	(N=47)	25.79
	Mar	(N=75)	31.4
	Apr	(N=105)	36.63
	May	(N=135)	39.83
	Jun	(N=162)	40.96
	Jul	(N=198)	40.29
	Aug	(N=228)	37.75
	Sep	(N=258)	33.21
	Oct	(N=288)	27.37
	Nov	(N=318)	22.17
	Dec	(N=344)	19.74
	Average		31.35
KUI	Jan	(N=17)	7.36
	Feb	(N=47)	12.84
	Mar	(N=75)	20.84
	Apr	(N=105)	30.27
	May	(N=135)	37.82
	Jun	(N=162)	41.24
	Jul	(N=198)	39.54
	Aug	(N=228)	33.2
	Sep	(N=258)	24.22
	Oct	(N=288)	15.16
	Nov	(N=318)	8.62
	Dec	(N=344)	6.01
	Average		23.09
LBR	Jan	(N=17)	19.8
	Feb	(N=47)	24.66
	Mar	(N=75)	30.56
	Apr	(N=105)	36.24
	May	(N=135)	39.85
	Jun	(N=162)	41.17
	Jul	(N=198)	40.42
	Aug	(N=228)	37.53
	Sep	(N=258)	32.54
	Oct	(N=288)	26.33
	Nov	(N=318)	20.91
	Dec	(N=344)	18.41
	Average		30.7016
LEC	Jan	(N=17)	14.66
	Feb	(N=47)	20
	Mar	(N=75)	26.95
	Apr	(N=105)	34.26
	May	(N=135)	39.45
	Jun	(N=162)	41.59
	Jul	(N=198)	40.46
	Aug	(N=228)	36.22
	Sep	(N=258)	29.55
	Oct	(N=288)	22.01
	Nov	(N=318)	15.89
	Dec	(N=344)	13.21
	Average		27.8541
LRB	Jan	(N=17)	19.79
	Feb	(N=47)	24.65
	Mar	(N=75)	30.56
	Apr	(N=105)	36.23
	May	(N=135)	39.85
	Jun	(N=162)	41.17
	Jul	(N=198)	40.42
	Aug	(N=228)	37.53
	Sep	(N=258)	32.54
	Oct	(N=288)	26.33
	Nov	(N=318)	20.9
	Dec	(N=344)	18.4
	Average		30.6975
MAZ	Jan	(N=17)	14.79
	Feb	(N=47)	20.12
	Mar	(N=75)	27.05
	Apr	(N=105)	34.32
	May	(N=135)	39.47
	Jun	(N=162)	41.58
	Jul	(N=198)	40.47
	Aug	(N=228)	36.26
	Sep	(N=258)	29.64
	Oct	(N=288)	22.12
	Nov	(N=318)	16.02
	Dec	(N=344)	13.34
	Average		27.9316
MBO	Jan	(N=17)	34.23
	Feb	(N=47)	36.11
	Mar	(N=75)	37.41
	Apr	(N=105)	37.29
	May	(N=135)	36.02
	Jun	(N=162)	35.07
	Jul	(N=198)	35.35
	Aug	(N=228)	36.52
	Sep	(N=258)	37.13
	Oct	(N=288)	36.29
	Nov	(N=318)	34.55
	Dec	(N=344)	33.5
	Average		35.7891
MZS	Jan	(N=17)	31.78
	Feb	(N=47)	34.39
	Mar	(N=75)	36.71
	Apr	(N=105)	37.76
	May	(N=135)	37.41
	Jun	(N=162)	36.87
	Jul	(N=198)	36.96
	Aug	(N=228)	37.38
	Sep	(N=258)	36.89
	Oct	(N=288)	34.9
	Nov	(N=318)	32.29
	Dec	(N=344)	30.88
	Average		35.35
MKS	Jan	(N=17)	9.92
	Feb	(N=47)	15.44
	Mar	(N=75)	23.13
	Apr	(N=105)	31.84
	May	(N=135)	38.53
	Jun	(N=162)	41.46
	Jul	(N=198)	39.98
	Aug	(N=228)	34.42
	Sep	(N=258)	26.25
	Oct	(N=288)	17.67
	Nov	(N=318)	11.19
	Dec	(N=344)	8.5
	Average		24.86
PRA	Jan	(N=17)	12.24
	Feb	(N=47)	17.7
	Mar	(N=75)	25.07
	Apr	(N=105)	33.1
	May	(N=135)	39.04
	Jun	(N=162)	41.57
	Jul	(N=198)	40.27
	Aug	(N=228)	35.37
	Sep	(N=258)	27.94
	Oct	(N=288)	19.84
	Nov	(N=318)	13.5
	Dec	(N=344)	10.79
	Average		26.3691
RHS	Jan	(N=17)	8.35
	Feb	(N=47)	13.85
	Mar	(N=75)	21.74
	Apr	(N=105)	30.9
	May	(N=135)	38.11
	Jun	(N=162)	41.33
	Jul	(N=198)	39.72
	Aug	(N=228)	33.69
	Sep	(N=258)	25.03
	Oct	(N=288)	16.14
	Nov	(N=318)	9.61
	Dec	(N=344)	6.97
	Average		23.7866
SAN	Jan	(N=17)	18.61
	Feb	(N=47)	23.6
	Mar	(N=75)	29.77
	Apr	(N=105)	35.84
	May	(N=135)	39.82
	Jun	(N=162)	41.33
	Jul	(N=198)	40.49
	Aug	(N=228)	37.29
	Sep	(N=258)	31.9
	Oct	(N=288)	25.36
	Nov	(N=318)	19.75
	Dec	(N=344)	17.2
	Average		30.08
SFK	Jan	(N=17)	7.69
	Feb	(N=47)	13.18
	Mar	(N=75)	21.14
	Apr	(N=105)	30.48
	May	(N=135)	37.92
	Jun	(N=162)	41.27
	Jul	(N=198)	39.6
	Aug	(N=228)	33.37
	Sep	(N=258)	24.49
	Oct	(N=288)	15.49
	Nov	(N=318)	8.95
	Dec	(N=344)	6.33
	Average		23.3258
SHA	Jan	(N=17)	17.42
	Feb	(N=47)	22.53
	Mar	(N=75)	28.96
	Apr	(N=105)	35.41
	May	(N=135)	39.75
	Jun	(N=162)	41.44
	Jul	(N=198)	40.52
	Aug	(N=228)	37.01
	Sep	(N=258)	31.23
	Oct	(N=288)	24.38
	Nov	(N=318)	18.6
	Dec	(N=344)	15.99
	Average		29.4366
SHL	Jan	(N=17)	8.35
	Feb	(N=47)	13.85
	Mar	(N=75)	21.74
	Apr	(N=105)	30.9
	May	(N=135)	38.11
	Jun	(N=162)	41.33
	Jul	(N=198)	39.72
	Aug	(N=228)	33.69
	Sep	(N=258)	25.03
	Oct	(N=288)	16.14
	Nov	(N=318)	9.61
	Dec	(N=344)	6.97
	Average		23.7866
SKD	Jan	(N=17)	18.41
	Feb	(N=47)	23.42
	Mar	(N=75)	29.64
	Apr	(N=105)	35.77
	May	(N=135)	39.81
	Jun	(N=162)	41.35
	Jul	(N=198)	40.5
	Aug	(N=228)	37.24
	Sep	(N=258)	31.79
	Oct	(N=288)	25.2
	Nov	(N=318)	19.56
	Dec	(N=344)	16.99
	Average		29.97
SOL	Jan	(N=17)	11.71
	Feb	(N=47)	17.19
	Mar	(N=75)	24.64
	Apr	(N=105)	32.82
	May	(N=135)	38.94
	Jun	(N=162)	41.56
	Jul	(N=198)	40.21
	Aug	(N=228)	35.16
	Sep	(N=258)	27.57
	Oct	(N=288)	19.35
	Nov	(N=318)	12.98
	Dec	(N=344)	10.27
	Average		26.0333
TEX	Jan	(N=17)	7.21
	Feb	(N=47)	12.68
	Mar	(N=75)	20.69
	Apr	(N=105)	30.17
	May	(N=135)	37.77
	Jun	(N=162)	41.22
	Jul	(N=198)	39.51
	Aug	(N=228)	33.12
	Sep	(N=258)	24.09
	Oct	(N=288)	15
	Nov	(N=318)	8.46
	Dec	(N=344)	5.87
	Average		22.9825
WDS	Jan	(N=17)	16.75
	Feb	(N=47)	21.92
	Mar	(N=75)	28.48
	Apr	(N=105)	35.14
	May	(N=135)	39.7
	Jun	(N=162)	41.5
	Jul	(N=198)	40.52
	Aug	(N=228)	36.83
	Sep	(N=258)	30.84
	Oct	(N=288)	23.81
	Nov	(N=318)	17.94
	Dec	(N=344)	15.31
	Average		29.0616
ROM	Jan	(N=17)	7.89
	Feb	(N=47)	13.38
	Mar	(N=75)	21.32
	Apr	(N=105)	30.61
	May	(N=135)	37.98
	Jun	(N=162)	41.29
	Jul	(N=198)	39.63
	Aug	(N=228)	33.47
	Sep	(N=258)	24.65
	Oct	(N=288)	15.69
	Nov	(N=318)	9.15
	Dec	(N=344)	6.52
	Average		23.465
SSS	Jan	(N=17)	17.81
	Feb	(N=47)	22.89
	Mar	(N=75)	29.23
	Apr	(N=105)	35.55
	May	(N=135)	39.78
	Jun	(N=162)	41.41
	Jul	(N=198)	40.51
	Aug	(N=228)	37.11
	Sep	(N=258)	31.46
	Oct	(N=288)	24.71
	Nov	(N=318)	18.98
	Dec	(N=344)	16.39
	Average		29.6525
SXW	Jan	(N=17)	17.81
	Feb	(N=47)	22.89
	Mar	(N=75)	29.23
	Apr	(N=105)	35.55
	May	(N=135)	39.78
	Jun	(N=162)	41.41
	Jul	(N=198)	40.51
	Aug	(N=228)	37.11
	Sep	(N=258)	31.46
	Oct	(N=288)	24.71
	Nov	(N=318)	18.98
	Dec	(N=344)	16.39
	Average		29.65
TAN	Jan	(N=17)	16.52
	Feb	(N=47)	21.72
	Mar	(N=75)	28.32
	Apr	(N=105)	35.05
	May	(N=135)	39.68
	Jun	(N=162)	41.51
	Jul	(N=198)	40.52
	Aug	(N=228)	36.77
	Sep	(N=258)	30.71
	Oct	(N=288)	23.62
	Nov	(N=318)	17.72
	Dec	(N=344)	15.08
	Average		28.93
UDA	Jan	(N=17)	34.23
	Feb	(N=47)	36.11
	Mar	(N=75)	37.41
	Apr	(N=105)	37.29
	May	(N=135)	36.02
	Jun	(N=162)	35.07
	Jul	(N=198)	35.35
	Aug	(N=228)	36.52
	Sep	(N=258)	37.13
	Oct	(N=288)	36.29
	Nov	(N=318)	34.55
	Dec	(N=344)	33.5
	Average		35.7891
WAD	Jan	(N=17)	32.03
	Feb	(N=47)	34.57
	Mar	(N=75)	36.79
	Apr	(N=105)	37.73
	May	(N=135)	37.29
	Jun	(N=162)	36.71
	Jul	(N=198)	36.82
	Aug	(N=228)	37.31
	Sep	(N=258)	36.93
	Oct	(N=288)	35.05
	Nov	(N=318)	32.52
	Dec	(N=344)	31.14
	Average		35.4075

## Sheet: Supplementary Table S3
Supplementary Table S3. Sunshine fraction and average of extraterrestrial solar radiation from each geographic region for old and native sheep populations.
Breed	Latitude (Degree ; Radian)	Sunshine fraction S	Extera-terrestrial radiations-Annual average	Clearness index Kbar	Solar radiation (Hbar) [MJ/m^2/day]
AFA	9.15 ; 0.1596976	0.7042	35.4516	0.588297	20.8561
AFS	36.67 ; 0.64001224	0.6005	29.3	0.539057	15.7944
ALS	47.48 ; 0.82868233	0.6223	25.291	0.549589	13.8996
ALT	41.1171432 ; 0.7176295278522	0.5332	27.736	0.505863	14.0306
BAJ	50.85 ; 0.88749992	0.5482	23.92	0.513356	12.2795
BAL	27.58 ; 0.48136181	0.7138	32.06	0.592752	19.0036
BBS	51.17 ; 0.89308498	0.4066	23.7866	0.4401	10.4685
BOZ	40.53 ; 0.70738195	0.516	27.9508	0.497201	13.8972
BQS	7.27 ; 0.1268854	0.652	35.61	0.563777	20.0761
BSB	46.21 ; 0.80651665	0.5998	25.8	0.538717	13.8989
CAU	45.71 ; 0.79779	0.45	25.99	0.463199	12.0385
CLS	34.02 ; 0.59376101	0.5963	30.1725	0.537016	16.2031
DLS	38.37 ; 0.66968283	0.5944	28.72	0.536092	15.3966
EFR	49.82 ; 0.86952303	0.3003	24.3433	0.380425	9.2608
FIN	64.71 ; 1.1294026	0.2794	18.2058	0.368058	6.70078
GHE	38.07 ; 0.66444685	0.6021	28.82	0.539833	15.558
GOL	63.139647 ; 1.10199472869	0.3124	18.81	0.387478	7.28846
HDW	35.62 ; 0.62168628	0.551	29.66	0.514748	15.2674
HUS	32.44 ; 0.56618481	0.4748	30.66	0.476125	14.598
ICE	64.96 ; 1.1337659	0.1925	18.1133	0.313575	5.67989
KAR	36.55 ; 0.63791784	0.6489	29.34	0.562304	16.498
KER	30.12 ; 0.52569317	0.7126	31.35	0.592196	18.5653
KUI	52.84 ; 0.92223198	0.4168	23.09	0.445587	10.2886
LBR	32.32 ; 0.56409041	0.7323	30.7016	0.601291	18.4606
LEC	40.7928393 ; 0.7119693570202	0.5434	27.8541	0.510964	14.2324
LRB	32.33 ; 0.56426495	0.7193	30.6975	0.595296	18.2741
MAZ	40.58 ; 0.70825461	0.495	27.9316	0.486518	13.5892
MBO	4.6125522 ; 0.0805042228099	0.4649	35.7891	0.470987	16.8562
MKS	48.55 ; 0.84735735	0.3931	24.86	0.432781	10.7589
MZS	10.12 ; 0.17662732	0.6576	35.35	0.566432	20.0234
OUE	46.76 ; 0.81611596	0.3942	25.58	0.43338	11.0859
PRA	44.74 ; 0.78086031	0.4306	26.3691	0.452952	11.9439
RHS	51.17; 0.89308498	0.3206	23.7866	0.392215	9.32946
ROM	51.9460656 ; 0.9066298781747	0.3373	23.465	0.401763	9.42737
SAN	34.31 ; 0.59882247	0.6474	30.08	0.561591	16.8927
SFK	52.28 ; 0.91245813	0.3272	23.3258	0.396004	9.23712
SHA	36.27 ; 0.63303092	0.5481	29.4366	0.513306	15.11
SHL	51.17 ; 0.89308498	0.2101	23.7866	0.325075	7.73242
SKD	34.64 ; 0.60458205	0.6355	29.97	0.555917	16.6608
SOL	45.6083 ; 0.7960150012	0.3853	26.0333	0.428521	11.1558
SSS	35.62 ; 0.62168628	0.551	29.6525	0.514748	15.2636
SXW	35.62 ; 0.62168628	0.551	29.65	0.514748	15.2623
TAN	37.75 ; 0.65886179	0.6253	28.93	0.55103	15.9413
TEX	53.0995532 ; 0.9267620346756	0.3253	22.9825	0.394916	9.07615
UDA	4.6125522 ; 0.0805042228099	0.3712	35.7891	0.42076	15.0586
WAD	9.6000359 ; 0.167552234764	0.4674	35.4075	0.472287	16.7225
WDS	37.38 ; 0.65240407	0.5908	29.0616	0.534338	15.5287

## Sheet: Supplementary Table S4
Supplementary Table S4. Information of all CNVs and CNVRs in the 695 old and native sheep populations.
CNVs					CNVRs					Unique CNVs
Chr.	Region start	Region end	Length	Type	Chr.	Region start	Region end	Length	Type	Chr.	Region start	Region end	Length	Type
1	239185878	239256562	70685	Homozygous deletion	1	165342484	165352845	10362	Mixed	1	100043947	100053169	9223	Duplication
1	83002598	83013747	11150	Hemizygous deletion	1	166135991	167340755	1204765	Mixed	1	10040970	10127149	86180	Deletion
1	225703623	225708934	5312	Duplication	1	194235823	194297124	61302	Mixed	1	101014513	101017356	2844	Deletion
1	134424148	134494368	70221	Hemizygous deletion	1	204613149	204780301	167153	Mixed	1	101016626	101027829	11204	Deletion
1	239185878	239256562	70685	Hemizygous deletion	1	210535206	210576373	41168	Mixed	1	101017356	101027829	10474	Deletion
1	110244710	110256941	12232	Duplication	1	221151789	222115446	963658	Mixed	1	101087151	101089961	2811	Duplication
1	110357732	110387808	30077	Duplication	1	239180800	239266757	85958	Mixed	1	101859037	101869493	10457	Deletion
1	239185878	239256562	70685	Homozygous deletion	1	240888719	241200399	311681	Mixed	1	101920672	101955893	35222	Duplication
1	49439907	49460791	20885	Hemizygous deletion	1	241619250	241828188	208939	Mixed	1	101931320	101944496	13177	Duplication
1	239185878	239256562	70685	Homozygous deletion	1	242059404	242300122	240719	Mixed	1	102509360	102527315	17956	Deletion
1	150512915	150544234	31320	Hemizygous deletion	1	254522160	254571363	49204	Mixed	1	1027795	1090493	62699	Deletion
1	239185878	239256562	70685	Homozygous deletion	1	259520908	259580523	59616	Mixed	1	102806607	102811207	4601	Deletion
1	130731839	130741948	10110	Hemizygous deletion	1	262049847	262133696	83850	Mixed	1	103122344	103127419	5076	Deletion
1	149345248	149349488	4241	Hemizygous deletion	1	264050343	264057275	6933	Mixed	1	103570503	103581305	10803	Deletion
1	150512915	150544234	31320	Hemizygous deletion	1	55910	67691	11782	Gain	1	103639277	103648569	9293	Deletion
1	153615898	153630638	14741	Hemizygous deletion	1	123073	1171464	1048392	Mixed	1	103639277	103656333	17057	Deletion
1	239185878	239256562	70685	Homozygous deletion	1	1220137	1236506	16370	Loss	1	103641601	103685644	44044	Deletion
1	83002598	83013747	11150	Hemizygous deletion	1	1385370	1411601	26232	Loss	1	104260926	104305868	44943	Duplication
1	150495070	150505127	10058	Duplication	1	1449868	1471439	21572	Gain	1	104260926	104328289	67364	Duplication
1	150512915	150544234	31320	Homozygous deletion	1	1536351	1646902	110552	Mixed	1	104260926	104330892	69967	Duplication
1	154083063	154085168	2106	Homozygous deletion	1	1688376	1701628	13253	Loss	1	104260926	104333787	72862	Duplication
1	239185878	239256562	70685	Homozygous deletion	1	1741492	1754908	13417	Loss	1	104570466	104609426	38961	Deletion
1	130731839	130741948	10110	Hemizygous deletion	1	1786508	1813994	27487	Gain	1	104573133	104609426	36294	Deletion
1	239185878	239256562	70685	Homozygous deletion	1	2069474	2081593	12120	Loss	1	104596489	104617783	21295	Deletion
1	34487159	34503450	16292	Hemizygous deletion	1	2142799	2232076	89278	Loss	1	104704189	104719158	14970	Deletion
1	146553279	146579886	26608	Hemizygous deletion	1	2281498	2288659	7162	Loss	1	104966494	104969918	3425	Deletion
1	204716558	204749000	32443	Hemizygous deletion	1	2627438	2630826	3389	Loss	1	105093945	105095542	1598	Deletion
1	271470163	271472789	2627	Duplication	1	2943259	2974971	31713	Loss	1	105166875	105180327	13453	Deletion
1	239185878	239256562	70685	Homozygous deletion	1	3112486	3125341	12856	Loss	1	105177914	105180327	2414	Deletion
1	274140079	274169446	29368	Hemizygous deletion	1	3254292	3271788	17497	Loss	1	105177914	105194200	16287	Deletion
1	109017046	109018860	1815	Duplication	1	3394581	3397184	2604	Loss	1	105317903	105352594	34692	Deletion
1	239185878	239256562	70685	Homozygous deletion	1	3417932	3436288	18357	Loss	1	105741762	105744410	2649	Duplication
1	34487159	34503450	16292	Hemizygous deletion	1	4163961	4170218	6258	Gain	1	105904745	105923234	18490	Duplication
1	83002598	83013747	11150	Hemizygous deletion	1	5064113	5070386	6274	Loss	1	105983228	106067828	84601	Duplication
1	158630332	158659086	28755	Hemizygous deletion	1	5886376	5890315	3940	Loss	1	106178212	106200117	21906	Duplication
1	231110633	231116566	5934	Hemizygous deletion	1	6414319	6422842	8524	Gain	1	107150651	107160334	9684	Duplication
1	150495070	150505127	10058	Duplication	1	6965571	6989486	23916	Loss	1	107383682	107399852	16171	Deletion
1	34487159	34503450	16292	Hemizygous deletion	1	7124631	7142538	17908	Gain	1	10740505	10765462	24958	Deletion
1	134424148	134482442	58295	Hemizygous deletion	1	7272046	7296424	24379	Loss	1	10745944	10757420	11477	Deletion
1	239185878	239256562	70685	Hemizygous deletion	1	7516232	7523412	7181	Loss	1	107483422	107496221	12800	Deletion
1	239185878	239256562	70685	Homozygous deletion	1	8060056	8069364	9309	Loss	1	107514442	107562391	47950	Deletion
1	59717429	59729987	12559	Hemizygous deletion	1	8654470	8664387	9918	Loss	1	107541482	107562391	20910	Deletion
1	83002598	83043220	40623	Hemizygous deletion	1	9033837	9043267	9431	Loss	1	107547001	107562391	15391	Deletion
1	239185878	239256562	70685	Hemizygous deletion	1	10040970	10127149	86180	Loss	1	107966791	107976640	9850	Deletion
1	65770815	65794589	23775	Duplication	1	10740505	10765462	24958	Loss	1	107966791	107976856	10066	Deletion
1	239185878	239256562	70685	Homozygous deletion	1	10922185	10972937	50753	Loss	1	107975786	107976856	1071	Deletion
1	34487159	34503450	16292	Hemizygous deletion	1	13435289	13443232	7944	Gain	1	108100704	108108820	8117	Duplication
1	150512915	150536898	23984	Hemizygous deletion	1	13479628	13482062	2435	Gain	1	1081128	1086497	5370	Deletion
1	13479628	13482062	2435	Duplication	1	13924530	13935694	11165	Loss	1	1081128	1171464	90337	Deletion
1	262100025	262103532	3508	Hemizygous deletion	1	14468033	14480585	12553	Loss	1	1086441	1090493	4053	Deletion
1	239180800	239220518	39719	Duplication	1	14665662	14670121	4460	Loss	1	108852101	108857853	5753	Duplication
1	117042642	117048230	5589	Homozygous deletion	1	15634821	15650896	16076	Loss	1	109017046	109018370	1325	Duplication
1	626498	761240	134743	Hemizygous deletion	1	15708931	15724037	15107	Loss	1	109017046	109018860	1815	Duplication
1	822684	836832	14149	Hemizygous deletion	1	15794456	15819430	24975	Mixed	1	1090493	1130113	39621	Deletion
1	3417932	3419652	1721	Hemizygous deletion	1	15957108	15975205	18098	Gain	1	109119749	109133609	13861	Deletion
1	129671809	129675465	3657	Hemizygous deletion	1	17796999	17814737	17739	Loss	1	109119749	109146652	26904	Deletion
1	132560097	132575409	15313	Hemizygous deletion	1	17817532	17819759	2228	Gain	1	109130321	109146652	16332	Deletion
1	147743618	147853717	110100	Hemizygous deletion	1	17852861	17866785	13925	Loss	1	109133517	109146652	13136	Deletion
1	260279035	260280899	1865	Hemizygous deletion	1	17972728	18039883	67156	Mixed	1	109133517	109147584	14068	Deletion
1	271942805	271975014	32210	Hemizygous deletion	1	19236889	19252867	15979	Loss	1	109146233	109147584	1352	Deletion
1	27068373	27103785	35413	Duplication	1	19515981	19636191	120211	Loss	1	10922185	10936100	13916	Deletion
1	228077815	228079874	2060	Duplication	1	19997296	19998516	1221	Loss	1	10922185	10950921	28737	Deletion
1	150512915	150544234	31320	Homozygous deletion	1	20250231	20261701	11471	Loss	1	10922185	10972937	50753	Deletion
1	553722	563419	9698	Hemizygous deletion	1	20355515	20369907	14393	Loss	1	10933282	10946901	13620	Deletion
1	72522926	72530400	7475	Hemizygous deletion	1	20872287	20880171	7885	Loss	1	10950921	10963109	12189	Deletion
1	241427309	241445251	17943	Hemizygous deletion	1	21227576	21236305	8730	Gain	1	1095927	1116835	20909	Deletion
1	110269586	110290769	21184	Duplication	1	21463082	21479990	16909	Loss	1	110238914	110241914	3001	Duplication
1	110357732	110380268	22537	Duplication	1	23070333	23071732	1400	Gain	1	110238914	110256941	18028	Duplication
1	225703623	225706025	2403	Duplication	1	23810357	23827955	17599	Gain	1	110238914	110265741	26828	Duplication
1	38230776	38255534	24759	Hemizygous deletion	1	24172178	24239181	67004	Loss	1	110238914	110276990	38077	Duplication
1	239180800	239220518	39719	Duplication	1	26580439	26695660	115222	Loss	1	110238914	110284391	45478	Duplication
1	112840469	112845132	4664	Hemizygous deletion	1	27043519	27112825	69307	Mixed	1	110238914	110290769	51856	Duplication
1	146553279	146579886	26608	Hemizygous deletion	1	28217137	28241351	24215	Loss	1	110238914	110293854	54941	Duplication
1	274161781	274181505	19725	Hemizygous deletion	1	28748558	28769987	21430	Loss	1	110238914	110295948	57035	Duplication
1	110269586	110284391	14806	Duplication	1	29917699	29949152	31454	Loss	1	110238914	110348050	109137	Duplication
1	110357732	110387808	30077	Duplication	1	30466517	30472370	5854	Loss	1	110238914	110355371	116458	Duplication
1	34487159	34503450	16292	Homozygous deletion	1	34288483	34294041	5559	Gain	1	110238914	110387808	148895	Duplication
1	38230776	38260191	29416	Hemizygous deletion	1	34487159	34503450	16292	Loss	1	110238914	110391978	153065	Duplication
1	107966791	107976856	10066	Hemizygous deletion	1	34578862	34588486	9625	Loss	1	110241832	110284391	42560	Duplication
1	231110633	231116566	5934	Hemizygous deletion	1	34605245	34666982	61738	Loss	1	110241832	110290769	48938	Duplication
1	240558901	240584165	25265	Hemizygous deletion	1	34867976	34887209	19234	Gain	1	110241832	110293854	52023	Duplication
1	239185878	239220518	34641	Duplication	1	37036353	37052441	16089	Gain	1	110241832	110324454	82623	Duplication
1	130731839	130741948	10110	Hemizygous deletion	1	37401835	37405688	3854	Gain	1	110241832	110337752	95921	Duplication
1	153615898	153630638	14741	Hemizygous deletion	1	37511912	37527114	15203	Loss	1	110244710	110256941	12232	Duplication
1	110290769	110324454	33686	Duplication	1	37692427	37698726	6300	Loss	1	110244710	110273323	28614	Duplication
1	110355371	110387808	32438	Duplication	1	38230776	38260191	29416	Loss	1	110244710	110282554	37845	Duplication
1	238072246	238100298	28053	Duplication	1	39417916	39460227	42312	Loss	1	110244710	110284391	39682	Duplication
1	117042642	117059022	16381	Homozygous deletion	1	40085503	40098814	13312	Loss	1	110244710	110286604	41895	Duplication
1	125742723	125743987	1265	Homozygous deletion	1	40763013	40792881	29869	Loss	1	110244710	110290769	46060	Duplication
1	154083063	154085168	2106	Homozygous deletion	1	41435860	41439072	3213	Loss	1	110244710	110293854	49145	Duplication
1	233794328	233813011	18684	Hemizygous deletion	1	41706116	41733649	27534	Loss	1	110244710	110380268	135559	Duplication
1	255866903	255870098	3196	Hemizygous deletion	1	42864076	42865375	1300	Gain	1	110244710	110387808	143099	Duplication
1	27055583	27103785	48203	Duplication	1	44340823	44349255	8433	Mixed	1	110248531	110256941	8411	Duplication
1	38230776	38255534	24759	Hemizygous deletion	1	44413887	44416845	2959	Loss	1	110248531	110265741	17211	Duplication
1	157248715	157335919	87205	Hemizygous deletion	1	44428768	44436011	7244	Gain	1	110248531	110273323	24793	Duplication
1	165349010	165352845	3836	Hemizygous deletion	1	44666130	44712525	46396	Loss	1	110248531	110276990	28460	Duplication
1	173512455	173567358	54904	Hemizygous deletion	1	44833405	44853538	20134	Loss	1	110248531	110282554	34024	Duplication
1	110248531	110282554	34024	Duplication	1	44908422	44938334	29913	Loss	1	110248531	110284391	35861	Duplication
1	110293854	110391978	98125	Duplication	1	45138805	45226122	87318	Loss	1	110248531	110293854	45324	Duplication
1	553722	563419	9698	Hemizygous deletion	1	46569239	46643149	73911	Loss	1	110248531	110295948	47418	Duplication
1	729206	764111	34906	Hemizygous deletion	1	46841419	46854545	13127	Gain	1	110248531	110324454	75924	Duplication
1	869920	961697	91778	Hemizygous deletion	1	47026519	47035713	9195	Loss	1	110248531	110380268	131738	Duplication
1	3417932	3419652	1721	Hemizygous deletion	1	47401492	47496318	94827	Loss	1	110248531	110387808	139278	Duplication
1	8060056	8069364	9309	Hemizygous deletion	1	47699623	47726200	26578	Loss	1	110253647	110282554	28908	Duplication
1	131117242	131138997	21756	Hemizygous deletion	1	47760690	47871645	110956	Loss	1	110253647	110284391	30745	Duplication
1	165349010	165352845	3836	Hemizygous deletion	1	48027986	48078789	50804	Loss	1	110253647	110295948	42302	Duplication
1	233786228	233815659	29432	Hemizygous deletion	1	48122675	48140535	17861	Loss	1	110253647	110380268	126622	Duplication
1	260279035	260280899	1865	Hemizygous deletion	1	48488727	48490661	1935	Loss	1	110253647	110391978	138332	Duplication
1	261344665	261364015	19351	Hemizygous deletion	1	48617053	48780636	163584	Mixed	1	110255860	110256941	1082	Duplication
1	263195056	263224640	29585	Hemizygous deletion	1	48980816	49047157	66342	Loss	1	110255860	110265741	9882	Duplication
1	34487159	34503450	16292	Homozygous deletion	1	49436360	49521980	85621	Loss	1	110255860	110282554	26695	Duplication
1	276156	307655	31500	Hemizygous deletion	1	49731406	49870483	139078	Loss	1	110255860	110284391	28532	Duplication
1	912612	926700	14089	Hemizygous deletion	1	50393154	50394209	1056	Loss	1	110255860	110290769	34910	Duplication
1	150526498	150544234	17737	Hemizygous deletion	1	50551893	50562297	10405	Loss	1	110255860	110293854	37995	Duplication
1	261133642	261140480	6839	Hemizygous deletion	1	51239379	51281281	41903	Gain	1	110255860	110295948	40089	Duplication
1	262246565	262253123	6559	Hemizygous deletion	1	51331070	51592391	261322	Mixed	1	110255860	110357732	101873	Duplication
1	110255860	110256941	1082	Duplication	1	51792626	51805794	13169	Loss	1	110255860	110387808	131949	Duplication
1	110355371	110387808	32438	Duplication	1	52222844	52291767	68924	Loss	1	110255860	110391978	136119	Duplication
1	34487159	34503450	16292	Homozygous deletion	1	52989784	53007878	18095	Loss	1	110256540	110282554	26015	Duplication
1	905648	926700	21053	Hemizygous deletion	1	54547748	54568164	20417	Loss	1	110256540	110284391	27852	Duplication
1	27055583	27082284	26702	Duplication	1	54573038	54581219	8182	Gain	1	110256540	110295948	39409	Duplication
1	110269586	110282554	12969	Duplication	1	55233289	55247384	14096	Loss	1	110265741	110276990	11250	Duplication
1	110346851	110387808	40958	Duplication	1	55492119	55499508	7390	Loss	1	110265741	110291830	26090	Duplication
1	154083063	154085168	2106	Homozygous deletion	1	55716096	55792883	76788	Loss	1	110265741	110293854	28114	Duplication
1	153615898	153630638	14741	Hemizygous deletion	1	55948103	55992235	44133	Loss	1	110265741	110295948	30208	Duplication
1	274161781	274169446	7666	Hemizygous deletion	1	56218348	56502203	283856	Loss	1	110269586	110282554	12969	Duplication
1	239185878	239212139	26262	Duplication	1	56859742	56880390	20649	Loss	1	110269586	110284391	14806	Duplication
1	146553279	146579886	26608	Hemizygous deletion	1	57205114	57207539	2426	Gain	1	110269586	110290769	21184	Duplication
1	165349010	165352845	3836	Hemizygous deletion	1	57461850	57488763	26914	Loss	1	110269586	110295948	26363	Duplication
1	262246565	262253123	6559	Hemizygous deletion	1	57661307	57666773	5467	Loss	1	110269586	110324454	54869	Duplication
1	110241832	110284391	42560	Duplication	1	57767295	57808589	41295	Loss	1	110269586	110387808	118223	Duplication
1	110375419	110387808	12390	Duplication	1	57920769	57986890	66122	Loss	1	110269586	110391978	122393	Duplication
1	239185878	239220518	34641	Duplication	1	58022278	58043778	21501	Loss	1	110269586	110401392	131807	Duplication
1	455653	563419	107767	Hemizygous deletion	1	58559447	58646980	87534	Loss	1	110273323	110282554	9232	Duplication
1	1619087	1622107	3021	Hemizygous deletion	1	58833946	58880553	46608	Loss	1	110273323	110284391	11069	Duplication
1	2949884	2961710	11827	Hemizygous deletion	1	58893502	58912021	18520	Loss	1	110273323	110295948	22626	Duplication
1	20355515	20369907	14393	Hemizygous deletion	1	59153698	59177192	23495	Loss	1	110276990	110295948	18959	Duplication
1	124165513	124169850	4338	Hemizygous deletion	1	59717429	59729987	12559	Loss	1	110282554	110290769	8216	Duplication
1	261133642	261141262	7621	Hemizygous deletion	1	60131671	60173777	42107	Loss	1	110282554	110295948	13395	Duplication
1	261344665	261364015	19351	Hemizygous deletion	1	60363308	60371894	8587	Loss	1	110282554	110391978	109425	Duplication
1	262049847	262093901	44055	Hemizygous deletion	1	60838767	60897839	59073	Loss	1	110290769	110324454	33686	Duplication
1	263185519	263224640	39122	Hemizygous deletion	1	60979811	60989778	9968	Gain	1	110290769	110337752	46984	Duplication
1	154083063	154085168	2106	Homozygous deletion	1	62146189	62268412	122224	Loss	1	110290769	110379058	88290	Duplication
1	117042642	117048230	5589	Homozygous deletion	1	62779816	62780993	1178	Loss	1	110290769	110380268	89500	Duplication
1	165349010	165352845	3836	Homozygous deletion	1	63045126	63115311	70186	Loss	1	110290769	110387808	97040	Duplication
1	28217137	28241351	24215	Hemizygous deletion	1	65007615	65043923	36309	Loss	1	110293854	110341316	47463	Duplication
1	129130886	129137871	6986	Hemizygous deletion	1	65329954	65374114	44161	Loss	1	110293854	110387808	93955	Duplication
1	80104317	80130741	26425	Hemizygous deletion	1	65493888	65545807	51920	Loss	1	110293854	110391978	98125	Duplication
1	211179272	211212222	32951	Hemizygous deletion	1	65556345	65661847	105503	Mixed	1	110311445	110348050	36606	Duplication
1	240392468	240399550	7083	Hemizygous deletion	1	65672804	65856555	183752	Mixed	1	110311445	110387808	76364	Duplication
1	239850355	239857576	7222	Duplication	1	65889894	65909868	19975	Loss	1	110320165	110380268	60104	Duplication
1	110253647	110282554	28908	Duplication	1	66540738	66552319	11582	Loss	1	110320165	110387808	67644	Duplication
1	208143967	208160018	16052	Duplication	1	67428977	67451177	22201	Loss	1	110337752	110380268	42517	Duplication
1	132807086	132809164	2079	Duplication	1	67698440	67811269	112830	Loss	1	110337752	110387808	50057	Duplication
1	208143967	208160018	16052	Duplication	1	68636064	68666651	30588	Gain	1	110341316	110348050	6735	Duplication
1	34487159	34503450	16292	Homozygous deletion	1	68860478	68885581	25104	Loss	1	110341316	110380268	38953	Duplication
1	117042642	117048230	5589	Homozygous deletion	1	69187365	69209647	22283	Loss	1	110346851	110357732	10882	Duplication
1	150512915	150544234	31320	Homozygous deletion	1	72522926	72530400	7475	Loss	1	110346851	110379058	32208	Duplication
1	154083063	154085168	2106	Homozygous deletion	1	74094095	74107151	13057	Mixed	1	110346851	110387808	40958	Duplication
1	167361883	167402591	40709	Hemizygous deletion	1	75112721	75119594	6874	Gain	1	110347990	110379058	31069	Duplication
1	51244683	51263910	19228	Duplication	1	76315523	76324357	8835	Loss	1	110347990	110380268	32279	Duplication
1	117042642	117059022	16381	Homozygous deletion	1	76615220	76618063	2844	Loss	1	110347990	110387808	39819	Duplication
1	146553279	146579886	26608	Hemizygous deletion	1	77372387	77381042	8656	Loss	1	110355371	110379058	23688	Duplication
1	150512915	150560718	47804	Hemizygous deletion	1	77919664	77933717	14054	Loss	1	110355371	110380268	24898	Duplication
1	165342484	165352845	10362	Hemizygous deletion	1	78125892	78226301	100410	Loss	1	110355371	110387808	32438	Duplication
1	165349010	165352845	3836	Hemizygous deletion	1	78317243	78330205	12963	Loss	1	110356846	110379058	22213	Duplication
1	65627365	65635491	8127	Hemizygous deletion	1	78668909	78824012	155104	Loss	1	110356846	110380268	23423	Duplication
1	166578710	166586700	7991	Duplication	1	78927577	79345729	418153	Loss	1	110356846	110387808	30963	Duplication
1	150512915	150536898	23984	Hemizygous deletion	1	79376801	79470433	93633	Loss	1	110356846	110414616	57771	Duplication
1	231110633	231116566	5934	Hemizygous deletion	1	79619444	79713055	93612	Loss	1	110357732	110379058	21327	Duplication
1	51254967	51281281	26315	Duplication	1	79853227	79884176	30950	Loss	1	110357732	110380268	22537	Duplication
1	117042642	117048230	5589	Homozygous deletion	1	79949118	79969746	20629	Mixed	1	110357732	110387808	30077	Duplication
1	1385370	1411601	26232	Hemizygous deletion	1	80104317	80130741	26425	Loss	1	110357732	110391978	34247	Duplication
1	28217137	28236214	19078	Hemizygous deletion	1	80696526	80699462	2937	Loss	1	110375419	110380268	4850	Duplication
1	34487159	34503450	16292	Hemizygous deletion	1	80723611	80855022	131412	Loss	1	110375419	110387808	12390	Duplication
1	48714284	48727387	13104	Hemizygous deletion	1	80924234	81350296	426063	Mixed	1	110375419	110391978	16560	Duplication
1	129130886	129137871	6986	Hemizygous deletion	1	81456601	81480539	23939	Gain	1	110375419	110407995	32577	Duplication
1	131589894	131609544	19651	Hemizygous deletion	1	81506851	81567979	61129	Loss	1	110387808	110407995	20188	Duplication
1	165349010	165352845	3836	Hemizygous deletion	1	81677781	81740356	62576	Loss	1	110572272	110586201	13930	Deletion
1	166576994	166608685	31692	Hemizygous deletion	1	81796710	81838449	41740	Loss	1	110572272	110599329	27058	Deletion
1	204703146	204749000	45855	Hemizygous deletion	1	81925353	81951941	26589	Loss	1	110599329	110619181	19853	Deletion
1	218930434	218964918	34485	Hemizygous deletion	1	82296831	82333646	36816	Gain	1	111800260	111817178	16919	Deletion
1	23070333	23071732	1400	Duplication	1	82376920	82470277	93358	Loss	1	1122950	1146615	23666	Deletion
1	40085503	40092466	6964	Hemizygous deletion	1	82650050	82658989	8940	Gain	1	112517210	112544735	27526	Deletion
1	65627365	65645842	18478	Hemizygous deletion	1	82702258	82724361	22104	Loss	1	112517210	112561534	44325	Deletion
1	131573669	131593432	19764	Hemizygous deletion	1	82982220	83043220	61001	Loss	1	112840469	112845132	4664	Deletion
1	172458461	172468191	9731	Hemizygous deletion	1	84771179	84825773	54595	Loss	1	112840469	112849270	8802	Deletion
1	231110633	231116566	5934	Hemizygous deletion	1	85640452	85641678	1227	Loss	1	113488229	113555965	67737	Deletion
1	239185878	239256562	70685	Hemizygous deletion	1	85799358	85801120	1763	Loss	1	113817005	113819423	2419	Deletion
1	110282554	110290769	8216	Duplication	1	86000468	86003962	3495	Gain	1	113902759	113934326	31568	Deletion
1	110375419	110387808	12390	Duplication	1	86275425	86280837	5413	Loss	1	114842515	114852539	10025	Deletion
1	34487159	34503450	16292	Homozygous deletion	1	86918752	86923754	5003	Loss	1	115344770	115349657	4888	Duplication
1	130731839	130741948	10110	Hemizygous deletion	1	88961481	89002941	41461	Loss	1	115900720	115912570	11851	Deletion
1	157248715	157335919	87205	Hemizygous deletion	1	90699686	90721523	21838	Loss	1	116296308	116351109	54802	Deletion
1	110375419	110387808	12390	Duplication	1	91120086	91132787	12702	Loss	1	116305012	116351109	46098	Deletion
1	157251211	157335919	84709	Hemizygous deletion	1	91217512	91386296	168785	Loss	1	116637047	116655000	17954	Deletion
1	239185878	239256562	70685	Hemizygous deletion	1	93480457	93482585	2129	Gain	1	117045900	117059022	13123	Deletion
1	110238914	110265741	26828	Duplication	1	93779353	93790159	10807	Mixed	1	117802927	117810338	7412	Deletion
1	1086441	1090493	4053	Homozygous deletion	1	95232591	95271621	39031	Loss	1	120037227	120045009	7783	Deletion
1	37511912	37527114	15203	Hemizygous deletion	1	96853745	96898155	44411	Gain	1	121220014	121241868	21855	Deletion
1	116305012	116351109	46098	Hemizygous deletion	1	96925620	96946562	20943	Gain	1	121265385	121275938	10554	Deletion
1	130731839	130743004	11166	Hemizygous deletion	1	96966302	96993533	27232	Mixed	1	1220137	1236506	16370	Deletion
1	150512915	150544234	31320	Hemizygous deletion	1	97618347	97641141	22795	Gain	1	123073	149293	26221	Deletion
1	157251211	157335919	84709	Hemizygous deletion	1	98121016	98127870	6855	Gain	1	123073	176918	53846	Deletion
1	201959216	201962495	3280	Hemizygous deletion	1	98310442	98311564	1123	Gain	1	123073	988021	864949	Deletion
1	51244683	51281281	36599	Duplication	1	98401639	98465901	64263	Gain	1	123844631	123863613	18983	Deletion
1	34487159	34503450	16292	Homozygous deletion	1	99936533	99938002	1470	Gain	1	124165513	124169850	4338	Deletion
1	27068373	27108215	39843	Hemizygous deletion	1	100043947	100053169	9223	Mixed	1	125200234	125220248	20015	Deletion
1	48027986	48078789	50804	Hemizygous deletion	1	101014513	101027829	13317	Loss	1	125707258	125727100	19843	Deletion
1	127170144	127182285	12142	Hemizygous deletion	1	101087151	101089961	2811	Gain	1	125707258	125743987	36730	Deletion
1	133034159	133035362	1204	Hemizygous deletion	1	101859037	101869493	10457	Loss	1	125726953	125743987	17035	Deletion
1	221098926	221119775	20850	Hemizygous deletion	1	101920672	101955893	35222	Gain	1	125742723	125753241	10519	Duplication
1	34487159	34503450	16292	Hemizygous deletion	1	102509360	102527315	17956	Loss	1	126691683	126732612	40930	Deletion
1	149345248	149349488	4241	Hemizygous deletion	1	102806607	102811207	4601	Loss	1	126691683	126791283	99601	Deletion
1	218956964	218964918	7955	Hemizygous deletion	1	103122344	103127419	5076	Loss	1	126950810	126985571	34762	Deletion
1	34487159	34503450	16292	Homozygous deletion	1	103570503	103581305	10803	Loss	1	126969399	126975301	5903	Deletion
1	107383682	107399852	16171	Hemizygous deletion	1	103639277	103685644	46368	Loss	1	126969399	127026495	57097	Deletion
1	130731839	130743004	11166	Hemizygous deletion	1	104260926	104333787	72862	Gain	1	127156174	127182285	26112	Deletion
1	154083063	154085168	2106	Hemizygous deletion	1	104570466	104617783	47318	Loss	1	127170144	127182285	12142	Deletion
1	159146670	159163677	17008	Hemizygous deletion	1	104704189	104719158	14970	Loss	1	128708463	128738703	30241	Duplication
1	215043287	215051554	8268	Hemizygous deletion	1	104966494	104969918	3425	Loss	1	129130886	129137871	6986	Deletion
1	34487159	34503450	16292	Homozygous deletion	1	105093945	105095542	1598	Loss	1	129130886	129155349	24464	Deletion
1	117042642	117048230	5589	Homozygous deletion	1	105166875	105194200	27326	Loss	1	129575602	129587296	11695	Deletion
1	79949118	79969746	20629	Hemizygous deletion	1	105317903	105352594	34692	Loss	1	129671809	129675465	3657	Deletion
1	130731839	130743004	11166	Hemizygous deletion	1	105741762	105744410	2649	Gain	1	129755038	129828375	73338	Deletion
1	145887562	145889891	2330	Hemizygous deletion	1	105904745	105923234	18490	Gain	1	129769501	129828375	58875	Deletion
1	158713070	158719147	6078	Hemizygous deletion	1	105983228	106067828	84601	Gain	1	129769501	129917392	147892	Deletion
1	160618434	160643435	25002	Hemizygous deletion	1	106178212	106200117	21906	Gain	1	129775431	129828375	52945	Deletion
1	164099523	164181011	81489	Hemizygous deletion	1	107150651	107160334	9684	Gain	1	129793196	129814120	20925	Deletion
1	241158734	241162612	3879	Hemizygous deletion	1	107383682	107399852	16171	Loss	1	129793196	129828375	35180	Deletion
1	34487159	34503450	16292	Hemizygous deletion	1	107483422	107496221	12800	Loss	1	129803914	129805273	1360	Duplication
1	127170144	127182285	12142	Hemizygous deletion	1	107514442	107562391	47950	Loss	1	129899261	129997595	98335	Deletion
1	166576994	166611334	34341	Hemizygous deletion	1	107966791	107976856	10066	Loss	1	130022553	130025394	2842	Deletion
1	167361883	167407378	45496	Hemizygous deletion	1	108100704	108108820	8117	Gain	1	130147732	130181794	34063	Deletion
1	218956964	218964918	7955	Hemizygous deletion	1	108852101	108857853	5753	Gain	1	130283428	130285445	2018	Deletion
1	110320165	110387808	67644	Duplication	1	109017046	109018860	1815	Gain	1	130426025	130456155	30131	Deletion
1	34487159	34503450	16292	Homozygous deletion	1	109119749	109147584	27836	Loss	1	130426025	130500991	74967	Deletion
1	26580439	26695660	115222	Hemizygous deletion	1	110238914	110414616	175703	Gain	1	130443798	130464349	20552	Deletion
1	40763013	40792881	29869	Hemizygous deletion	1	110572272	110619181	46910	Loss	1	130550393	130660898	110506	Deletion
1	48617053	48727387	110335	Hemizygous deletion	1	111800260	111817178	16919	Loss	1	130727311	130741948	14638	Deletion
1	49731406	49870483	139078	Hemizygous deletion	1	112517210	112561534	44325	Loss	1	130727311	130743004	15694	Deletion
1	51331070	51445311	114242	Hemizygous deletion	1	112840469	112849270	8802	Loss	1	130727311	130750525	23215	Deletion
1	58559447	58646980	87534	Hemizygous deletion	1	113488229	113555965	67737	Loss	1	130731839	130741948	10110	Deletion
1	60838767	60897839	59073	Hemizygous deletion	1	113817005	113819423	2419	Loss	1	130731839	130743004	11166	Deletion
1	62229835	62252686	22852	Hemizygous deletion	1	113902759	113934326	31568	Loss	1	130731839	130750525	18687	Deletion
1	67770756	67774647	3892	Hemizygous deletion	1	114842515	114852539	10025	Loss	1	130741743	130743004	1262	Deletion
1	78668909	78824012	155104	Hemizygous deletion	1	115344770	115349657	4888	Gain	1	131004079	131005355	1277	Deletion
1	84771179	84825773	54595	Hemizygous deletion	1	115900720	115912570	11851	Loss	1	131004079	131138997	134919	Deletion
1	88961481	89002941	41461	Hemizygous deletion	1	116296308	116351109	54802	Loss	1	131004079	131790731	786653	Deletion
1	107514442	107562391	47950	Hemizygous deletion	1	116637047	116655000	17954	Loss	1	131028236	131037938	9703	Deletion
1	127156174	127182285	26112	Hemizygous deletion	1	117042642	117059022	16381	Mixed	1	131028236	131362875	334640	Deletion
1	130727311	130750525	23215	Hemizygous deletion	1	117802927	117810338	7412	Loss	1	131117242	131138997	21756	Deletion
1	132306996	132442157	135162	Hemizygous deletion	1	120037227	120045009	7783	Loss	1	131438951	131459521	20571	Duplication
1	132837472	132885302	47831	Hemizygous deletion	1	121220014	121241868	21855	Loss	1	131492711	131539307	46597	Deletion
1	135141310	135207908	66599	Hemizygous deletion	1	121265385	121275938	10554	Loss	1	131492711	131593432	100722	Deletion
1	135353309	135689049	335741	Hemizygous deletion	1	123844631	123863613	18983	Loss	1	131492711	131600632	107922	Deletion
1	138971317	139020568	49252	Hemizygous deletion	1	124165513	124169850	4338	Loss	1	131492711	131602685	109975	Deletion
1	145944511	146022027	77517	Hemizygous deletion	1	125200234	125220248	20015	Loss	1	131492711	131656696	163986	Deletion
1	146553279	146579886	26608	Hemizygous deletion	1	125707258	125753241	45984	Mixed	1	131509979	131539307	29329	Deletion
1	148401569	148451520	49952	Hemizygous deletion	1	126691683	126791283	99601	Loss	1	131509979	131593432	83454	Deletion
1	149742993	149988404	245412	Hemizygous deletion	1	126950810	127026495	75686	Loss	1	131509979	131600632	90654	Deletion
1	166135991	166225994	90004	Hemizygous deletion	1	127156174	127182285	26112	Loss	1	131532319	131539307	6989	Deletion
1	167289683	167340755	51073	Hemizygous deletion	1	128708463	128738703	30241	Gain	1	131539300	131600632	61333	Deletion
1	183861352	184033644	172293	Hemizygous deletion	1	129130886	129155349	24464	Loss	1	131573669	131593432	19764	Deletion
1	204524079	204565717	41639	Hemizygous deletion	1	129575602	129587296	11695	Loss	1	131573669	131600632	26964	Deletion
1	219582773	219633235	50463	Hemizygous deletion	1	129671809	129675465	3657	Loss	1	131573669	131602685	29017	Deletion
1	220156840	220320982	164143	Hemizygous deletion	1	129755038	129997595	242558	Mixed	1	131589894	131593432	3539	Deletion
1	220991055	221049482	58428	Hemizygous deletion	1	130022553	130025394	2842	Loss	1	131589894	131609544	19651	Deletion
1	221219432	221245456	26025	Hemizygous deletion	1	130147732	130181794	34063	Loss	1	131637699	131744252	106554	Deletion
1	221773339	222115446	342108	Hemizygous deletion	1	130283428	130285445	2018	Loss	1	132120258	132148279	28022	Deletion
1	222979948	223011806	31859	Hemizygous deletion	1	130426025	130500991	74967	Loss	1	132120258	132153294	33037	Deletion
1	240974140	241047996	73857	Hemizygous deletion	1	130550393	130660898	110506	Loss	1	132224765	132249976	25212	Deletion
1	254558852	254571363	12512	Duplication	1	130727311	130750525	23215	Loss	1	132249976	132307837	57862	Deletion
1	34487159	34503450	16292	Homozygous deletion	1	131004079	131790731	786653	Mixed	1	132249976	132315705	65730	Deletion
1	157263283	157335919	72637	Hemizygous deletion	1	132120258	132153294	33037	Loss	1	132249976	132400854	150879	Deletion
1	146553279	146579886	26608	Hemizygous deletion	1	132224765	133049786	825022	Mixed	1	132293781	132349173	55393	Deletion
1	192390505	192482099	91595	Hemizygous deletion	1	133197278	133387864	190587	Loss	1	132306996	132315705	8710	Deletion
1	34487159	34503450	16292	Hemizygous deletion	1	133403009	133419220	16212	Gain	1	132306996	132387561	80566	Deletion
1	130022553	130025394	2842	Hemizygous deletion	1	133426705	133471650	44946	Loss	1	132306996	132442157	135162	Deletion
1	150512915	150536898	23984	Hemizygous deletion	1	133561071	133586794	25724	Loss	1	132306996	132575409	268414	Deletion
1	110238914	110293854	54941	Duplication	1	133611474	133873358	261885	Loss	1	132553811	132575409	21599	Deletion
1	239185878	239256562	70685	Homozygous deletion	1	133905848	133964363	58516	Loss	1	132553811	132609729	55919	Deletion
1	41706116	41733649	27534	Hemizygous deletion	1	134087503	134101677	14175	Gain	1	132560097	132575409	15313	Deletion
1	146553279	146579886	26608	Hemizygous deletion	1	134200705	134212367	11663	Gain	1	132560097	132794286	234190	Deletion
1	130731839	130741948	10110	Hemizygous deletion	1	134382963	134495754	112792	Loss	1	132571636	132575409	3774	Deletion
1	146553279	146579886	26608	Hemizygous deletion	1	134524046	134555721	31676	Loss	1	132639330	132685982	46653	Deletion
1	149345248	149349488	4241	Hemizygous deletion	1	134592070	134945609	353540	Loss	1	132698414	132719151	20738	Deletion
1	150526498	150544234	17737	Hemizygous deletion	1	135076441	135207908	131468	Loss	1	132745851	132752881	7031	Deletion
1	160900434	160969089	68656	Hemizygous deletion	1	135353309	135689049	335741	Loss	1	132745851	132772235	26385	Deletion
1	110282554	110295948	13395	Duplication	1	135827042	135848293	21252	Loss	1	132745851	132794286	48436	Deletion
1	110375419	110387808	12390	Duplication	1	135950759	136024153	73395	Loss	1	132745851	132885302	139452	Deletion
1	262423448	262426951	3504	Duplication	1	136153392	136195589	42198	Loss	1	132745851	133049786	303936	Deletion
1	150512915	150536898	23984	Hemizygous deletion	1	138755707	138761495	5789	Loss	1	132807086	132809164	2079	Duplication
1	160900434	160969089	68656	Hemizygous deletion	1	138971317	139020568	49252	Loss	1	132837472	132885302	47831	Deletion
1	110241832	110324454	82623	Duplication	1	139386254	139450109	63856	Loss	1	132842227	132885302	43076	Deletion
1	110375419	110380268	4850	Duplication	1	139534175	139546368	12194	Loss	1	132960912	132967018	6107	Deletion
1	146553279	146579886	26608	Hemizygous deletion	1	139804455	139810295	5841	Gain	1	132960912	133035362	74451	Deletion
1	239185878	239256562	70685	Hemizygous deletion	1	140978420	141051447	73028	Loss	1	133034159	133035362	1204	Deletion
1	34487159	34503450	16292	Homozygous deletion	1	141207174	141223368	16195	Gain	1	133197278	133387864	190587	Deletion
1	130731839	130741948	10110	Hemizygous deletion	1	142203508	142215273	11766	Gain	1	133297348	133302729	5382	Deletion
1	146553279	146579886	26608	Hemizygous deletion	1	142256291	142259540	3250	Gain	1	133314091	133356828	42738	Deletion
1	166497717	166512361	14645	Hemizygous deletion	1	142372897	142459266	86370	Loss	1	133314091	133360594	46504	Deletion
1	34288483	34294041	5559	Duplication	1	143334830	143342551	7722	Loss	1	133337474	133387864	50391	Deletion
1	154198068	154201227	3160	Duplication	1	143433100	143444071	10972	Loss	1	133382529	133387864	5336	Deletion
1	150512915	150536898	23984	Hemizygous deletion	1	143793043	143930085	137043	Loss	1	133403009	133419220	16212	Duplication
1	239185878	239256562	70685	Hemizygous deletion	1	144064793	144095785	30993	Loss	1	133426705	133471650	44946	Deletion
1	110256540	110295948	39409	Duplication	1	144116329	144126755	10427	Loss	1	133452792	133471650	18859	Deletion
1	110375419	110380268	4850	Duplication	1	144201658	144318296	116639	Loss	1	133561071	133586794	25724	Deletion
1	34487159	34503450	16292	Homozygous deletion	1	145165838	145172552	6715	Loss	1	133611474	133873358	261885	Deletion
1	150512915	150536898	23984	Hemizygous deletion	1	145580804	146829966	1249163	Loss	1	133905848	133964363	58516	Deletion
1	93480457	93482585	2129	Duplication	1	146884319	146919224	34906	Loss	1	134087503	134101677	14175	Duplication
1	7124631	7142538	17908	Duplication	1	147040698	147063496	22799	Loss	1	134200705	134212367	11663	Duplication
1	93480457	93482585	2129	Duplication	1	147621131	147695484	74354	Loss	1	13435289	13443232	7944	Duplication
1	99936708	99938002	1295	Duplication	1	147743618	147853717	110100	Loss	1	134382963	134424148	41186	Deletion
1	109017046	109018370	1325	Duplication	1	147871099	147907511	36413	Loss	1	134384166	134424148	39983	Deletion
1	110269586	110295948	26363	Duplication	1	148146232	148230829	84598	Loss	1	134424148	134482442	58295	Deletion
1	110347990	110387808	39819	Duplication	1	148370023	148451520	81498	Loss	1	134424148	134494368	70221	Deletion
1	150512915	150544234	31320	Homozygous deletion	1	148481785	148625114	143330	Loss	1	134447233	134449853	2621	Deletion
1	167361883	167402591	40709	Hemizygous deletion	1	148677561	148680579	3019	Loss	1	134482442	134495754	13313	Deletion
1	274140079	274161923	21845	Hemizygous deletion	1	148718666	148754273	35608	Loss	1	134524046	134555721	31676	Deletion
1	110356846	110380268	23423	Duplication	1	148918475	149144542	226068	Loss	1	134592070	134945609	353540	Deletion
1	50393154	50394209	1056	Hemizygous deletion	1	149297526	150560718	1263193	Mixed	1	134681121	134693672	12552	Deletion
1	96966302	96970804	4503	Hemizygous deletion	1	150690905	150867793	176889	Mixed	1	13479628	13482062	2435	Duplication
1	165246917	165275110	28194	Hemizygous deletion	1	150957784	151015793	58010	Loss	1	134906836	134945609	38774	Deletion
1	110269586	110282554	12969	Duplication	1	151032437	151165628	133192	Loss	1	135076441	135096137	19697	Deletion
1	65794589	65810228	15640	Hemizygous deletion	1	151235336	151278307	42972	Loss	1	135076441	135193869	117429	Deletion
1	154083063	154085168	2106	Homozygous deletion	1	151865815	151960925	95111	Loss	1	135092311	135193869	101559	Deletion
1	65569509	65611332	41824	Hemizygous deletion	1	151988172	151991943	3772	Loss	1	135141310	135172999	31690	Deletion
1	65794589	65810228	15640	Hemizygous deletion	1	152047187	152052277	5091	Loss	1	135141310	135193869	52560	Deletion
1	129130886	129137871	6986	Hemizygous deletion	1	152159098	152176363	17266	Loss	1	135141310	135207772	66463	Deletion
1	225703623	225706025	2403	Duplication	1	152341360	152343871	2512	Loss	1	135141310	135207908	66599	Deletion
1	239850355	239857576	7222	Duplication	1	152436658	152442381	5724	Loss	1	135172325	135207772	35448	Deletion
1	150526498	150544234	17737	Hemizygous deletion	1	152519179	152549842	30664	Loss	1	135353309	135689049	335741	Deletion
1	209863313	209873581	10269	Duplication	1	152579361	152689433	110073	Mixed	1	135440822	135567104	126283	Deletion
1	154083063	154085168	2106	Homozygous deletion	1	152759463	152764837	5375	Gain	1	135507962	135628455	120494	Deletion
1	222843883	222895048	51166	Hemizygous deletion	1	152887119	153012370	125252	Loss	1	135531087	135611459	80373	Deletion
1	60979811	60989778	9968	Duplication	1	153572140	153633919	61780	Loss	1	135628163	135668146	39984	Deletion
1	117042642	117048230	5589	Homozygous deletion	1	153911304	153937653	26350	Gain	1	135827042	135848293	21252	Deletion
1	125742723	125743987	1265	Homozygous deletion	1	154068958	154104378	35421	Loss	1	135950759	136024153	73395	Deletion
1	127170144	127182285	12142	Hemizygous deletion	1	154198068	154201227	3160	Gain	1	135963567	135986742	23176	Deletion
1	209863313	209873581	10269	Duplication	1	154605168	154609031	3864	Gain	1	135995361	136024153	28793	Deletion
1	34487159	34503450	16292	Homozygous deletion	1	154845112	154858213	13102	Loss	1	136153392	136193081	39690	Deletion
1	117042642	117048230	5589	Homozygous deletion	1	155023390	155070901	47512	Loss	1	136153392	136195589	42198	Deletion
1	96966302	96970804	4503	Hemizygous deletion	1	156123514	156157372	33859	Loss	1	1385370	1411601	26232	Deletion
1	225703623	225706025	2403	Duplication	1	156669953	156671475	1523	Gain	1	138755707	138761495	5789	Deletion
1	239850355	239857576	7222	Duplication	1	157202860	157348789	145930	Loss	1	138971317	139020568	49252	Deletion
1	34487159	34503450	16292	Hemizygous deletion	1	157452639	157456107	3469	Gain	1	13924530	13935694	11165	Deletion
1	222843883	222895048	51166	Hemizygous deletion	1	157504082	157535413	31332	Loss	1	13927068	13931338	4271	Deletion
1	117042642	117059022	16381	Duplication	1	157635503	157672345	36843	Loss	1	139386254	139450109	63856	Deletion
1	1086441	1090493	4053	Homozygous deletion	1	157726577	158003638	277062	Loss	1	139534175	139546368	12194	Deletion
1	65569509	65611332	41824	Hemizygous deletion	1	158086970	158103691	16722	Loss	1	139804455	139810295	5841	Duplication
1	65794589	65822552	27964	Hemizygous deletion	1	158318764	158325447	6684	Loss	1	140978420	141051447	73028	Deletion
1	194254721	194256084	1364	Duplication	1	158361040	158895912	534873	Mixed	1	141007314	141017876	10563	Deletion
1	154083063	154085168	2106	Homozygous deletion	1	159057390	159119239	61850	Loss	1	141207174	141223368	16195	Duplication
1	127170144	127182285	12142	Hemizygous deletion	1	159146670	159208067	61398	Loss	1	142203508	142215273	11766	Duplication
1	110273323	110284391	11069	Duplication	1	159295307	159307091	11785	Loss	1	142256291	142258954	2664	Duplication
1	110356846	110379058	22213	Duplication	1	159575342	159578129	2788	Gain	1	142256291	142259540	3250	Duplication
1	48621811	48727387	105577	Hemizygous deletion	1	159634894	159643921	9028	Loss	1	142372897	142459266	86370	Deletion
1	51339467	51343980	4514	Hemizygous deletion	1	160618434	160664568	46135	Mixed	1	143334830	143342551	7722	Deletion
1	58559447	58592429	32983	Hemizygous deletion	1	160900434	160969089	68656	Loss	1	143433100	143444071	10972	Deletion
1	80723611	80855022	131412	Hemizygous deletion	1	161578169	161579597	1429	Loss	1	143793043	143930085	137043	Deletion
1	81506851	81567979	61129	Hemizygous deletion	1	164082101	164181011	98911	Mixed	1	143810580	143830905	20326	Deletion
1	82376920	82412185	35266	Hemizygous deletion	1	164999160	165008705	9546	Loss	1	144064793	144095785	30993	Deletion
1	130147732	130181794	34063	Hemizygous deletion	1	165031070	165050464	19395	Loss	1	144116329	144126755	10427	Deletion
1	130731839	130743004	11166	Hemizygous deletion	1	165246917	165312974	66058	Loss	1	144201658	144238535	36878	Deletion
1	132745851	132772235	26385	Hemizygous deletion	1	165478855	165505651	26797	Loss	1	144201658	144250466	48809	Deletion
1	132960912	133035362	74451	Hemizygous deletion	1	165604076	165733354	129279	Loss	1	144223082	144318296	95215	Deletion
1	133337474	133387864	50391	Hemizygous deletion	1	165979917	166067168	87252	Loss	1	14468033	14480585	12553	Deletion
1	135076441	135193869	117429	Hemizygous deletion	1	167361883	167539036	177154	Loss	1	1449868	1451528	1661	Duplication
1	135507962	135628455	120494	Hemizygous deletion	1	167779367	167870195	90829	Loss	1	1449868	1452350	2483	Duplication
1	144064793	144095785	30993	Hemizygous deletion	1	167927191	167978245	51055	Loss	1	145165838	145172552	6715	Deletion
1	146022027	146031437	9411	Hemizygous deletion	1	168350490	168359519	9030	Gain	1	1452350	1471439	19090	Duplication
1	146553279	146601211	47933	Hemizygous deletion	1	169435079	169439658	4580	Loss	1	145580804	146829966	1249163	Deletion
1	148918475	149081746	163272	Hemizygous deletion	1	171974379	171980780	6402	Loss	1	145783486	145792665	9180	Deletion
1	150739863	150780730	40868	Hemizygous deletion	1	172458461	172468191	9731	Loss	1	145787077	145792665	5589	Deletion
1	150957784	151015793	58010	Hemizygous deletion	1	172653528	172656801	3274	Gain	1	145816322	145843225	26904	Deletion
1	152341360	152343871	2512	Hemizygous deletion	1	173133795	173190665	56871	Loss	1	145887562	145889891	2330	Deletion
1	154083063	154104378	21316	Hemizygous deletion	1	173287738	173290639	2902	Loss	1	145944511	146022027	77517	Deletion
1	158657484	158776303	118820	Hemizygous deletion	1	173407605	173567358	159754	Loss	1	146003141	146031437	28297	Deletion
1	159146670	159208067	61398	Hemizygous deletion	1	175184020	175262681	78662	Loss	1	146022027	146031437	9411	Deletion
1	166565436	166718397	152962	Hemizygous deletion	1	175346709	175349697	2989	Gain	1	146253504	146312277	58774	Deletion
1	222535280	222640055	104776	Hemizygous deletion	1	177783210	177797823	14614	Loss	1	146288595	146312277	23683	Deletion
1	238612612	238620605	7994	Hemizygous deletion	1	177977899	177980128	2230	Loss	1	146290411	146293367	2957	Deletion
1	250899911	250914584	14674	Hemizygous deletion	1	179071199	179150800	79602	Loss	1	146300857	146333650	32794	Deletion
1	274140079	274182063	41985	Hemizygous deletion	1	179168766	179193763	24998	Loss	1	146369231	146378481	9251	Deletion
1	110269586	110401392	131807	Duplication	1	180140973	180148812	7840	Loss	1	146382114	146436739	54626	Deletion
1	197658345	197668669	10325	Hemizygous deletion	1	180834387	180851265	16879	Loss	1	146534731	146579886	45156	Deletion
1	239185878	239266757	80880	Hemizygous deletion	1	181721685	181767833	46149	Loss	1	146553279	146579886	26608	Deletion
1	110244710	110387808	143099	Duplication	1	183861352	184033644	172293	Loss	1	146553279	146601211	47933	Deletion
1	239185878	239256562	70685	Homozygous deletion	1	185112942	185122413	9472	Loss	1	146568123	146579886	11764	Deletion
1	297075	307655	10581	Hemizygous deletion	1	185614760	185625895	11136	Loss	1	146601042	146602170	1129	Deletion
1	487720	500109	12390	Hemizygous deletion	1	187687278	187696314	9037	Loss	1	14665662	14670121	4460	Deletion
1	715895	761240	45346	Hemizygous deletion	1	188114685	188138778	24094	Loss	1	146884319	146900250	15932	Deletion
1	786126	836832	50707	Hemizygous deletion	1	188368558	188382342	13785	Loss	1	146884319	146919224	34906	Deletion
1	17852861	17866785	13925	Hemizygous deletion	1	188389985	188409354	19370	Loss	1	147040698	147063496	22799	Deletion
1	105317903	105352594	34692	Hemizygous deletion	1	188589558	188598986	9429	Gain	1	147621131	147695484	74354	Deletion
1	136153392	136195589	42198	Hemizygous deletion	1	189246818	189252820	6003	Loss	1	147743618	147853717	110100	Deletion
1	185112942	185122413	9472	Hemizygous deletion	1	189486975	189490698	3724	Gain	1	147871099	147904192	33094	Deletion
1	197650016	197668669	18654	Hemizygous deletion	1	189559216	189579918	20703	Loss	1	147879303	147907511	28209	Deletion
1	201959216	201977495	18280	Hemizygous deletion	1	190262119	190293504	31386	Gain	1	147892547	147904192	11646	Deletion
1	65759202	65794589	35388	Duplication	1	191332321	191341306	8986	Loss	1	148146232	148230829	84598	Deletion
1	110290769	110387808	97040	Duplication	1	192390505	192482099	91595	Loss	1	148189721	148209413	19693	Deletion
1	81456601	81480539	23939	Monoallelic triplication	1	193554101	193572148	18048	Loss	1	148370023	148451520	81498	Deletion
1	239185878	239256562	70685	Homozygous deletion	1	193829523	193839074	9552	Gain	1	148401569	148423295	21727	Deletion
1	65627365	65645842	18478	Hemizygous deletion	1	194055271	194086474	31204	Gain	1	148401569	148451520	49952	Deletion
1	34487159	34503450	16292	Homozygous deletion	1	194555365	194597506	42142	Loss	1	148481785	148490584	8800	Deletion
1	553722	563419	9698	Hemizygous deletion	1	197642199	197668669	26471	Loss	1	148481785	148510744	28960	Deletion
1	83002598	83013747	11150	Hemizygous deletion	1	198488958	198496709	7752	Loss	1	148481785	148593318	111534	Deletion
1	146553279	146579886	26608	Hemizygous deletion	1	200556276	200558566	2291	Loss	1	148510744	148519315	8572	Deletion
1	149829292	149981551	152260	Hemizygous deletion	1	201959216	201977495	18280	Loss	1	148593318	148625114	31797	Deletion
1	167361883	167402591	40709	Hemizygous deletion	1	202205044	202266725	61682	Loss	1	148677561	148680579	3019	Deletion
1	197647946	197664640	16695	Hemizygous deletion	1	202545166	202570202	25037	Loss	1	148718666	148754273	35608	Deletion
1	239185878	239256562	70685	Hemizygous deletion	1	203433595	203435869	2275	Gain	1	148918475	149081746	163272	Deletion
1	1449868	1452350	2483	Duplication	1	203876551	203883658	7108	Gain	1	148918475	149144542	226068	Deletion
1	117042642	117059022	16381	Homozygous deletion	1	204390980	204436036	45057	Loss	1	149005596	149069453	63858	Deletion
1	231110633	231116566	5934	Homozygous deletion	1	204491563	204565717	74155	Loss	1	149297526	149524076	226551	Deletion
1	24172178	24239181	67004	Hemizygous deletion	1	204974736	205005575	30840	Loss	1	149305088	149316539	11452	Deletion
1	56218348	56281210	62863	Hemizygous deletion	1	205122293	205132222	9930	Gain	1	149345248	149349488	4241	Deletion
1	56450424	56502203	51780	Hemizygous deletion	1	205217576	205238523	20948	Loss	1	149345248	149350802	5555	Deletion
1	58833946	58880553	46608	Hemizygous deletion	1	205980931	205999058	18128	Loss	1	149370855	149374954	4100	Deletion
1	60838767	60867735	28969	Hemizygous deletion	1	207024064	207049927	25864	Loss	1	149373387	149762148	388762	Deletion
1	67698440	67774647	76208	Hemizygous deletion	1	208055217	208064201	8985	Gain	1	149417773	149433322	15550	Deletion
1	79439516	79470433	30918	Hemizygous deletion	1	208143967	208160018	16052	Gain	1	149485120	149495261	10142	Deletion
1	81700795	81740356	39562	Hemizygous deletion	1	208737837	208832526	94690	Loss	1	149485120	149643788	158669	Deletion
1	82982220	83013747	31528	Hemizygous deletion	1	208953842	208997210	43369	Loss	1	149562150	149643788	81639	Deletion
1	126950810	126985571	34762	Hemizygous deletion	1	209514541	209533785	19245	Gain	1	149578633	149600223	21591	Deletion
1	131028236	131362875	334640	Hemizygous deletion	1	209628581	209652581	24001	Loss	1	149578633	149622280	43648	Deletion
1	132553811	132609729	55919	Hemizygous deletion	1	209746895	209845887	98993	Loss	1	149578633	149643788	65156	Deletion
1	144201658	144250466	48809	Hemizygous deletion	1	209863313	209875869	12557	Gain	1	149578633	149711936	133304	Deletion
1	146534731	146579886	45156	Hemizygous deletion	1	209903389	209914253	10865	Loss	1	149587533	149600223	12691	Deletion
1	148146232	148230829	84598	Hemizygous deletion	1	209970265	210031347	61083	Loss	1	149587533	149699168	111636	Deletion
1	148370023	148451520	81498	Hemizygous deletion	1	210613956	210692409	78454	Loss	1	149596923	149600223	3301	Deletion
1	149485120	149643788	158669	Hemizygous deletion	1	211179272	211212222	32951	Loss	1	149621904	149669797	47894	Deletion
1	150112642	150341271	228630	Hemizygous deletion	1	211411722	211489509	77788	Loss	1	149723804	149733678	9875	Deletion
1	150484200	150509803	25604	Hemizygous deletion	1	212111922	212122025	10104	Gain	1	149723804	149750740	26937	Deletion
1	152612250	152647614	35365	Hemizygous deletion	1	212312049	212318134	6086	Loss	1	149742993	149759790	16798	Deletion
1	157202860	157251211	48352	Hemizygous deletion	1	214924009	214942288	18280	Loss	1	149742993	149988404	245412	Deletion
1	157504082	157535413	31332	Hemizygous deletion	1	215043287	215051554	8268	Loss	1	149829292	149981551	152260	Deletion
1	157635503	157672345	36843	Hemizygous deletion	1	216851435	216854108	2674	Gain	1	149934392	149944706	10315	Deletion
1	159057390	159107651	50262	Hemizygous deletion	1	218403846	218439225	35380	Loss	1	149934392	149946562	12171	Deletion
1	166565436	166751805	186370	Hemizygous deletion	1	218515022	218581774	66753	Loss	1	149934392	149954213	19822	Deletion
1	173133795	173190665	56871	Hemizygous deletion	1	218648139	218747682	99544	Gain	1	149934392	150509803	575412	Deletion
1	194555365	194597506	42142	Hemizygous deletion	1	218930434	218971014	40581	Loss	1	149939565	149944706	5142	Deletion
1	208953842	208968465	14624	Hemizygous deletion	1	219017274	219027183	9910	Gain	1	149939565	149946562	6998	Deletion
1	231164231	231167345	3115	Hemizygous deletion	1	219582773	219633235	50463	Loss	1	150112642	150341271	228630	Deletion
1	232305727	232326637	20911	Hemizygous deletion	1	219930645	219932713	2069	Loss	1	150176460	150201113	24654	Deletion
1	239185878	239256562	70685	Hemizygous deletion	1	220147771	220320982	173212	Loss	1	150177495	150248320	70826	Deletion
1	241632533	241655031	22499	Hemizygous deletion	1	220511845	220946924	435080	Loss	1	150191523	150193190	1668	Deletion
1	239185878	239256562	70685	Homozygous deletion	1	220956025	220981851	25827	Loss	1	150191523	150267487	75965	Deletion
1	553722	563419	9698	Hemizygous deletion	1	220991055	221049482	58428	Loss	1	150316034	150350003	33970	Deletion
1	85640452	85641678	1227	Hemizygous deletion	1	221098926	221131514	32589	Loss	1	150399071	150484952	85882	Deletion
1	165478855	165505651	26797	Hemizygous deletion	1	222209414	222210908	1495	Loss	1	150452833	150495286	42454	Deletion
1	197647946	197664640	16695	Hemizygous deletion	1	222363674	222696773	333100	Loss	1	150452833	150544234	91402	Deletion
1	110238914	110295948	57035	Duplication	1	222843883	222895048	51166	Loss	1	150453302	150495286	41985	Deletion
1	110355371	110387808	32438	Duplication	1	222904121	223011806	107686	Loss	1	150484200	150489716	5517	Deletion
1	203433595	203435869	2275	Duplication	1	223596482	223613311	16830	Loss	1	150484200	150495286	11087	Deletion
1	117042642	117048230	5589	Homozygous deletion	1	223862130	223923882	61753	Gain	1	150484200	150509803	25604	Deletion
1	130731839	130741948	10110	Homozygous deletion	1	224698798	224715776	16979	Loss	1	150495070	150505127	10058	Duplication
1	239185878	239256562	70685	Hemizygous deletion	1	225703623	225708934	5312	Gain	1	150509803	150536898	27096	Deletion
1	263233654	263237732	4079	Hemizygous deletion	1	226253194	226276407	23214	Gain	1	150509803	150544234	34432	Deletion
1	117042642	117048230	5589	Homozygous deletion	1	227304700	227322687	17988	Loss	1	150512915	150536898	23984	Deletion
1	239185878	239256562	70685	Homozygous deletion	1	227495292	227551528	56237	Loss	1	150512915	150544234	31320	Deletion
1	49454828	49460791	5964	Hemizygous deletion	1	228077815	228079874	2060	Gain	1	150512915	150549436	36522	Deletion
1	191334961	191341306	6346	Hemizygous deletion	1	228275568	228277556	1989	Loss	1	150512915	150560718	47804	Deletion
1	201959216	201976275	17060	Hemizygous deletion	1	228368658	228382825	14168	Loss	1	150526498	150532644	6147	Duplication
1	1449868	1452350	2483	Duplication	1	229406490	229456326	49837	Loss	1	150526498	150536898	10401	Duplication
1	146300857	146333650	32794	Hemizygous deletion	1	230893583	230896826	3244	Gain	1	150690905	150721939	31035	Deletion
1	172458461	172468191	9731	Hemizygous deletion	1	231110633	231121156	10524	Loss	1	150703666	150739863	36198	Deletion
1	239185878	239256562	70685	Hemizygous deletion	1	231164231	231167345	3115	Loss	1	150703666	150747738	44073	Deletion
1	241899000	241918703	19704	Hemizygous deletion	1	231219052	231227114	8063	Gain	1	150721447	150867793	146347	Deletion
1	34487159	34503450	16292	Homozygous deletion	1	232066248	232080065	13818	Loss	1	150739863	150780730	40868	Deletion
1	149345248	149349488	4241	Homozygous deletion	1	232305727	232326637	20911	Loss	1	150771493	150800844	29352	Duplication
1	65794589	65810228	15640	Hemizygous deletion	1	232662596	232668218	5623	Loss	1	150771493	150846526	75034	Deletion
1	146553279	146579886	26608	Hemizygous deletion	1	232744398	232749006	4609	Loss	1	150797848	150800844	2997	Duplication
1	239185878	239256562	70685	Hemizygous deletion	1	233702566	233729262	26697	Loss	1	150797848	150846526	48679	Deletion
1	159575342	159578129	2788	Duplication	1	233786228	233815659	29432	Loss	1	150828822	150846526	17705	Deletion
1	210535206	210551037	15832	Duplication	1	233878856	233899286	20431	Loss	1	150957784	151015793	58010	Deletion
1	117042642	117048230	5589	Homozygous deletion	1	234204643	234217738	13096	Gain	1	151032437	151165628	133192	Deletion
1	65794589	65810228	15640	Hemizygous deletion	1	234283779	234297046	13268	Loss	1	151077763	151108874	31112	Deletion
1	146553279	146579886	26608	Hemizygous deletion	1	234738957	234742228	3272	Loss	1	151235336	151278307	42972	Deletion
1	209628581	209652581	24001	Hemizygous deletion	1	235013678	235016997	3320	Loss	1	151865815	151915975	50161	Deletion
1	220511845	220946924	435080	Hemizygous deletion	1	235354192	235372933	18742	Loss	1	151909377	151960925	51549	Deletion
1	239185878	239256562	70685	Hemizygous deletion	1	236644782	236685904	41123	Loss	1	151942673	151960925	18253	Deletion
1	108852101	108857853	5753	Duplication	1	236999406	237020166	20761	Loss	1	151988172	151991943	3772	Deletion
1	210544348	210551037	6690	Duplication	1	238017602	238030486	12885	Gain	1	152047187	152052277	5091	Deletion
1	1086441	1090493	4053	Homozygous deletion	1	238072246	238100298	28053	Gain	1	152159098	152176363	17266	Deletion
1	117042642	117048230	5589	Homozygous deletion	1	238210281	238249360	39080	Loss	1	152341360	152343871	2512	Deletion
1	49436360	49456490	20131	Hemizygous deletion	1	238320595	238426067	105473	Loss	1	152436658	152442381	5724	Deletion
1	65627365	65645842	18478	Hemizygous deletion	1	238612612	238620605	7994	Loss	1	152519179	152549842	30664	Deletion
1	107541482	107562391	20910	Hemizygous deletion	1	239171453	239174967	3515	Gain	1	152579361	152679838	100478	Duplication
1	130731839	130743004	11166	Hemizygous deletion	1	239557571	239561030	3460	Gain	1	152612250	152647614	35365	Deletion
1	131509979	131593432	83454	Hemizygous deletion	1	239850355	239857576	7222	Gain	1	152677374	152689433	12060	Duplication
1	132560097	132575409	15313	Hemizygous deletion	1	240305646	240361477	55832	Loss	1	152759463	152764837	5375	Duplication
1	154083063	154085168	2106	Hemizygous deletion	1	240392468	240399550	7083	Loss	1	152887119	152930282	43164	Deletion
1	158756488	158776303	19816	Hemizygous deletion	1	240558901	240584165	25265	Loss	1	152887119	153012370	125252	Deletion
1	164999160	165008705	9546	Hemizygous deletion	1	240760674	240766735	6062	Loss	1	152910935	152934670	23736	Deletion
1	209628581	209652581	24001	Hemizygous deletion	1	241337450	241355010	17561	Loss	1	152966721	152985569	18849	Deletion
1	220652590	220674802	22213	Hemizygous deletion	1	241427309	241445251	17943	Loss	1	152967651	152985569	17919	Deletion
1	222431583	222468610	37028	Hemizygous deletion	1	241899000	241918703	19704	Loss	1	152969982	152985569	15588	Deletion
1	239185878	239256562	70685	Hemizygous deletion	1	242400676	242419086	18411	Loss	1	152984808	153004909	20102	Deletion
1	27055583	27103785	48203	Duplication	1	242438838	242441977	3140	Loss	1	153572140	153633919	61780	Deletion
1	117042642	117048230	5589	Homozygous deletion	1	242837554	242844502	6949	Loss	1	153615898	153630638	14741	Deletion
1	130731839	130741948	10110	Homozygous deletion	1	244125234	244205919	80686	Loss	1	153615898	153633919	18022	Deletion
1	149345248	149349488	4241	Homozygous deletion	1	248002734	248016972	14239	Loss	1	1536351	1558892	22542	Deletion
1	1566976	1619087	52112	Hemizygous deletion	1	248027611	248040731	13121	Loss	1	1536351	1566976	30626	Deletion
1	49509322	49513293	3972	Hemizygous deletion	1	250899911	250914584	14674	Loss	1	153911304	153937653	26350	Duplication
1	62229835	62231143	1309	Hemizygous deletion	1	251790423	251855075	64653	Loss	1	154068958	154085168	16211	Deletion
1	81067557	81090709	23153	Hemizygous deletion	1	253277110	253288285	11176	Loss	1	154083063	154085168	2106	Deletion
1	91217512	91230093	12582	Hemizygous deletion	1	253666436	253680367	13932	Gain	1	154083063	154092545	9483	Deletion
1	125707258	125727100	19843	Hemizygous deletion	1	254578509	254579841	1333	Loss	1	154083063	154104378	21316	Deletion
1	132120258	132148279	28022	Hemizygous deletion	1	255581021	255597353	16333	Gain	1	154198068	154201227	3160	Duplication
1	132306996	132315705	8710	Hemizygous deletion	1	255744244	255749415	5172	Loss	1	154605168	154609031	3864	Duplication
1	132745851	132752881	7031	Hemizygous deletion	1	255866903	255870098	3196	Loss	1	154845112	154858213	13102	Deletion
1	148481785	148490584	8800	Hemizygous deletion	1	257462577	257477107	14531	Loss	1	155023390	155070901	47512	Deletion
1	152910935	152934670	23736	Hemizygous deletion	1	259446862	259461363	14502	Loss	1	1554303	1566976	12674	Deletion
1	158506852	158548032	41181	Hemizygous deletion	1	259995812	259997066	1255	Loss	1	1554303	1587105	32803	Duplication
1	204703146	204749000	45855	Hemizygous deletion	1	260279035	260291220	12186	Loss	1	1555888	1566976	11089	Deletion
1	222004461	222039773	35313	Hemizygous deletion	1	260865316	260876779	11464	Loss	1	156123514	156157372	33859	Deletion
1	241337450	241355010	17561	Hemizygous deletion	1	260945463	260977494	32032	Gain	1	15634821	15650896	16076	Deletion
1	130731839	130741948	10110	Homozygous deletion	1	260990333	261000488	10156	Loss	1	156669953	156671475	1523	Duplication
1	204720869	204747555	26687	Homozygous deletion	1	261133642	261141262	7621	Loss	1	1566976	1619087	52112	Deletion
1	209628581	209652581	24001	Hemizygous deletion	1	261344665	261378393	33729	Loss	1	15708931	15718949	10019	Deletion
1	6414319	6422842	8524	Duplication	1	261509607	261531254	21648	Loss	1	15708931	15719335	10405	Deletion
1	117042642	117059022	16381	Homozygous deletion	1	262217520	262339277	121758	Loss	1	15708931	15722284	13354	Deletion
1	146553279	146579886	26608	Hemizygous deletion	1	262423448	262443419	19972	Gain	1	15708931	15724037	15107	Deletion
1	209628581	209652581	24001	Hemizygous deletion	1	262818152	262824376	6225	Loss	1	157202860	157251211	48352	Deletion
1	227495292	227551528	56237	Hemizygous deletion	1	262929087	262944748	15662	Loss	1	157218536	157335919	117384	Deletion
1	82650050	82658989	8940	Duplication	1	263067069	263118151	51083	Loss	1	157248715	157335919	87205	Deletion
1	110273323	110282554	9232	Duplication	1	263145648	263149897	4250	Loss	1	157248715	157348789	100075	Deletion
1	110347990	110387808	39819	Duplication	1	263173339	263237732	64394	Loss	1	157251211	157335919	84709	Deletion
1	210535206	210551037	15832	Duplication	1	263555137	263558472	3336	Loss	1	157263283	157335919	72637	Deletion
1	117042642	117048230	5589	Homozygous deletion	1	263772088	263840396	68309	Loss	1	157452639	157456107	3469	Duplication
1	65562670	65627908	65239	Hemizygous deletion	1	263924931	263944017	19087	Loss	1	157504082	157535413	31332	Deletion
1	65681110	65693402	12293	Hemizygous deletion	1	264521706	264529677	7972	Gain	1	157635503	157672345	36843	Deletion
1	65794589	65810228	15640	Hemizygous deletion	1	264536490	264584281	47792	Loss	1	157726577	157985670	259094	Deletion
1	130731839	130741948	10110	Hemizygous deletion	1	269282058	269356407	74350	Gain	1	157820872	157843069	22198	Deletion
1	202545166	202570202	25037	Hemizygous deletion	1	269362323	269399257	36935	Gain	1	157826107	157843069	16963	Deletion
1	130731839	130741948	10110	Homozygous deletion	1	269455351	269620952	165602	Loss	1	15794456	15819430	24975	Deletion
1	65604153	65627908	23756	Hemizygous deletion	1	271055840	271063257	7418	Loss	1	157949921	158003638	53718	Deletion
1	65794589	65810228	15640	Hemizygous deletion	1	271408142	271417804	9663	Loss	1	15795644	15808032	12389	Deletion
1	96966302	96970804	4503	Hemizygous deletion	1	271470163	271472789	2627	Gain	1	15795644	15814529	18886	Deletion
1	204743506	204749000	5495	Hemizygous deletion	1	271771931	271775705	3775	Loss	1	15807900	15814529	6630	Deletion
1	239185878	239256562	70685	Hemizygous deletion	1	271942805	271975014	32210	Loss	1	158086970	158103691	16722	Deletion
1	27044617	27097748	53132	Duplication	1	272998574	273001836	3263	Loss	1	158318764	158325447	6684	Deletion
1	110273323	110282554	9232	Duplication	1	273191450	273195336	3887	Gain	1	158361040	158790466	429427	Deletion
1	110355371	110387808	32438	Duplication	1	274101146	274115675	14530	Loss	1	158506852	158520054	13203	Deletion
1	146553279	146579886	26608	Hemizygous deletion	1	274140079	274192630	52552	Loss	1	158506852	158534973	28122	Deletion
1	239185878	239256562	70685	Hemizygous deletion	1	274455329	274465484	10156	Gain	1	158506852	158544929	38078	Deletion
1	159575342	159578129	2788	Duplication	1	274731717	274753560	21844	Loss	1	158506852	158548032	41181	Deletion
1	117042642	117048230	5589	Homozygous deletion	1	275323933	275401369	77437	Loss	1	158506852	158565657	58806	Deletion
1	110269586	110282554	12969	Duplication	2	476257	505655	29399	Mixed	1	158506852	158680314	173463	Deletion
1	110355371	110387808	32438	Duplication	2	1869287	1957905	88619	Mixed	1	158518078	158544929	26852	Deletion
1	117042642	117048230	5589	Homozygous deletion	2	10708421	10717061	8641	Mixed	1	158533764	158561619	27856	Deletion
1	96966302	96970804	4503	Hemizygous deletion	2	20778161	20806837	28677	Mixed	1	158581482	158617660	36179	Deletion
1	227495292	227551528	56237	Hemizygous deletion	2	45341931	45371273	29343	Mixed	1	158581482	158659086	77605	Deletion
1	225703623	225706025	2403	Duplication	2	77036617	77057969	21353	Mixed	1	158581482	158677979	96498	Deletion
1	154068958	154085168	16211	Homozygous deletion	2	79906990	79979321	72332	Mixed	1	158581482	158680314	98833	Deletion
1	110375419	110387808	12390	Duplication	2	80694582	80698463	3882	Mixed	1	158581482	158895912	314431	Deletion
1	65556345	65627908	71564	Hemizygous deletion	2	97506017	97667028	161012	Mixed	1	158591960	158595857	3898	Deletion
1	65803494	65822552	19059	Hemizygous deletion	2	98713894	98746166	32273	Mixed	1	158624973	158630332	5360	Deletion
1	269362323	269399257	36935	Duplication	2	105084367	105087395	3029	Mixed	1	158630332	158659086	28755	Deletion
1	130731839	130741948	10110	Homozygous deletion	2	116055333	116109391	54059	Mixed	1	158630332	158669007	38676	Deletion
1	24200119	24234161	34043	Hemizygous deletion	2	121824171	122084154	259984	Mixed	1	158657484	158699547	42064	Deletion
1	150512915	150536898	23984	Hemizygous deletion	2	122814813	123060127	245315	Mixed	1	158657484	158776303	118820	Deletion
1	165349010	165352845	3836	Hemizygous deletion	2	138654475	138664137	9663	Mixed	1	158713070	158719147	6078	Deletion
1	239180800	239220518	39719	Duplication	2	146352885	146402646	49762	Mixed	1	158713070	158776303	63234	Deletion
1	127170144	127182285	12142	Hemizygous deletion	2	154398660	154435733	37074	Mixed	1	158713070	158790466	77397	Deletion
1	130727311	130741948	14638	Hemizygous deletion	2	166165611	166243366	77756	Mixed	1	158719147	158790466	71320	Deletion
1	150512915	150544234	31320	Hemizygous deletion	2	167667211	167671556	4346	Mixed	1	158735847	158788357	52511	Deletion
1	110269586	110387808	118223	Duplication	2	180486286	180575151	88866	Mixed	1	158740497	158790466	49970	Deletion
1	130731839	130741948	10110	Hemizygous deletion	2	188196234	188232622	36389	Mixed	1	158756488	158776303	19816	Deletion
1	27055583	27103785	48203	Duplication	2	194298391	194995014	696624	Mixed	1	158775892	158788357	12466	Duplication
1	110269586	110282554	12969	Duplication	2	198085585	199556459	1470875	Mixed	1	158775892	158790466	14575	Deletion
1	110346851	110387808	40958	Duplication	2	199702169	200429694	727526	Mixed	1	158844951	158861071	16121	Deletion
1	152759463	152764837	5375	Duplication	2	210888595	210938855	50261	Mixed	1	159057390	159107651	50262	Deletion
1	239185878	239220518	34641	Duplication	2	238791220	238821304	30085	Mixed	1	159057390	159119239	61850	Deletion
1	150512915	150544234	31320	Homozygous deletion	2	245399117	245449200	50084	Mixed	1	159146670	159163677	17008	Deletion
1	626498	642757	16260	Hemizygous deletion	2	248727429	248737462	10034	Mixed	1	159146670	159208067	61398	Deletion
1	130731839	130743004	11166	Hemizygous deletion	2	247250	249259	2010	Loss	1	159163494	159208067	44574	Deletion
1	154068958	154085168	16211	Hemizygous deletion	2	417074	423223	6150	Loss	1	159205595	159208067	2473	Deletion
1	274140079	274169446	29368	Hemizygous deletion	2	583623	586852	3230	Loss	1	159295307	159307091	11785	Deletion
1	110375419	110387808	12390	Duplication	2	723089	944335	221247	Loss	1	15957108	15975205	18098	Duplication
1	130731839	130741948	10110	Homozygous deletion	2	1042737	1054253	11517	Gain	1	159575342	159578129	2788	Duplication
1	276156	307655	31500	Hemizygous deletion	2	1129596	1148176	18581	Loss	1	159634894	159643921	9028	Deletion
1	626498	642757	16260	Hemizygous deletion	2	1534115	1583088	48974	Loss	1	160618434	160622668	4235	Deletion
1	3417932	3419652	1721	Hemizygous deletion	2	1701982	1761928	59947	Loss	1	160618434	160636201	17768	Deletion
1	6965571	6989486	23916	Hemizygous deletion	2	1842260	1859123	16864	Loss	1	160618434	160643435	25002	Deletion
1	27068373	27074805	6433	Hemizygous deletion	2	2214803	2250891	36089	Loss	1	160618434	160657995	39562	Deletion
1	80804229	80808559	4331	Hemizygous deletion	2	2569076	2603521	34446	Loss	1	160622668	160652084	29417	Duplication
1	90699686	90721523	21838	Hemizygous deletion	2	3045114	3071825	26712	Loss	1	160636201	160657995	21795	Duplication
1	165349010	165352845	3836	Hemizygous deletion	2	3532191	3620455	88265	Gain	1	160636201	160664568	28368	Duplication
1	239185878	239256562	70685	Hemizygous deletion	2	3748566	3758574	10009	Loss	1	160900434	160969089	68656	Deletion
1	110253647	110295948	42302	Duplication	2	4607946	4628512	20567	Loss	1	161578169	161579597	1429	Deletion
1	110375419	110391978	16560	Duplication	2	4739121	4742321	3201	Loss	1	1619087	1622107	3021	Deletion
1	117042642	117048230	5589	Homozygous deletion	2	4966865	4973133	6269	Gain	1	1619087	1646288	27202	Deletion
1	29917699	29938805	21107	Hemizygous deletion	2	5214378	5241355	26978	Loss	1	164082101	164181011	98911	Deletion
1	63077748	63092874	15127	Hemizygous deletion	2	5503611	5517066	13456	Gain	1	164099523	164181011	81489	Deletion
1	65672804	65810228	137425	Hemizygous deletion	2	9427885	9457437	29553	Loss	1	164125420	164136193	10774	Duplication
1	158624973	158630332	5360	Hemizygous deletion	2	10310912	10319396	8485	Loss	1	1642222	1646902	4681	Deletion
1	274161781	274181505	19725	Hemizygous deletion	2	10545543	10547104	1562	Loss	1	164999160	165008705	9546	Deletion
1	117042642	117048230	5589	Homozygous deletion	2	10612977	10630291	17315	Gain	1	165031070	165050464	19395	Deletion
1	154083063	154085168	2106	Homozygous deletion	2	11762036	11785810	23775	Loss	1	165246917	165275110	28194	Deletion
1	107966791	107976856	10066	Hemizygous deletion	2	11871443	11872571	1129	Gain	1	165255636	165275110	19475	Deletion
1	201959216	201976275	17060	Hemizygous deletion	2	12653859	12656836	2978	Gain	1	165256554	165275110	18557	Deletion
1	259520908	259580523	59616	Hemizygous deletion	2	12822948	12836010	13063	Gain	1	165272593	165312974	40382	Deletion
1	165349010	165352845	3836	Hemizygous deletion	2	13936335	13944077	7743	Loss	1	165342484	165352845	10362	Deletion
1	254522160	254558852	36693	Hemizygous deletion	2	15359390	15386220	26831	Gain	1	165349010	165352150	3141	Duplication
1	34487159	34503450	16292	Homozygous deletion	2	18393484	18437619	44136	Loss	1	165478855	165505651	26797	Deletion
1	117042642	117048230	5589	Homozygous deletion	2	19092643	19192662	100020	Loss	1	165604076	165698527	94452	Deletion
1	297075	307655	10581	Hemizygous deletion	2	19244859	19287034	42176	Loss	1	165678017	165733354	55338	Deletion
1	553722	563419	9698	Hemizygous deletion	2	19435310	19852745	417436	Loss	1	165979917	165989792	9876	Deletion
1	48488727	48490661	1935	Hemizygous deletion	2	19920113	19930606	10494	Loss	1	165979917	166001264	21348	Deletion
1	116305012	116351109	46098	Hemizygous deletion	2	19980530	19988694	8165	Loss	1	165989792	166064410	74619	Deletion
1	165349010	165352845	3836	Hemizygous deletion	2	20043242	20156529	113288	Loss	1	166027448	166060417	32970	Deletion
1	228275568	228277556	1989	Hemizygous deletion	2	20305032	20408273	103242	Loss	1	166027448	166067168	39721	Deletion
1	263076116	263097101	20986	Hemizygous deletion	2	20422878	20760180	337303	Loss	1	166135991	166225994	90004	Deletion
1	117042642	117048230	5589	Homozygous deletion	2	20842731	20926520	83790	Loss	1	166177163	166219954	42792	Deletion
1	90699686	90721523	21838	Hemizygous deletion	2	22375693	22396591	20899	Loss	1	166187036	167324676	1137641	Deletion
1	96966302	96970804	4503	Hemizygous deletion	2	22751425	22757492	6068	Loss	1	166214466	166225994	11529	Deletion
1	154083063	154092545	9483	Hemizygous deletion	2	23065186	23074959	9774	Loss	1	166214466	166247739	33274	Deletion
1	110269586	110282554	12969	Duplication	2	24131543	24142303	10761	Loss	1	166347084	166349592	2509	Deletion
1	110346851	110387808	40958	Duplication	2	24615939	24617311	1373	Loss	1	166497717	166512361	14645	Deletion
1	142256291	142259540	3250	Duplication	2	25570968	25581682	10715	Loss	1	166565436	166586700	21265	Deletion
1	29917699	29938805	21107	Hemizygous deletion	2	26123884	26148886	25003	Loss	1	166565436	166718397	152962	Deletion
1	274140079	274169446	29368	Hemizygous deletion	2	27172318	27197563	25246	Loss	1	166565436	166751805	186370	Deletion
1	108100704	108108820	8117	Duplication	2	27508007	27532537	24531	Gain	1	166569873	166608685	38813	Deletion
1	203433595	203435869	2275	Duplication	2	27553502	27564223	10722	Loss	1	166569873	166611334	41462	Deletion
1	626498	628019	1522	Hemizygous deletion	2	27785516	27798299	12784	Loss	1	166576994	166586700	9707	Duplication
1	154083063	154085168	2106	Hemizygous deletion	2	28109556	28113138	3583	Loss	1	166576994	166608685	31692	Deletion
1	158624973	158630332	5360	Hemizygous deletion	2	28765563	28784524	18962	Loss	1	166576994	166611334	34341	Deletion
1	179071199	179150800	79602	Hemizygous deletion	2	29286929	29338553	51625	Loss	1	166578710	166611334	32625	Deletion
1	274140079	274169446	29368	Hemizygous deletion	2	30736225	30740770	4546	Gain	1	166586579	166607642	21064	Deletion
1	110375419	110387808	12390	Duplication	2	33709342	33741431	32090	Loss	1	166586579	166611334	24756	Deletion
1	203433595	203435869	2275	Duplication	2	35036462	35046336	9875	Loss	1	166790009	166791670	1662	Deletion
1	239185878	239212139	26262	Duplication	2	35101888	35103219	1332	Loss	1	166790009	166814287	24279	Deletion
1	130731839	130741948	10110	Hemizygous deletion	2	36115801	36155201	39401	Gain	1	166790009	166832766	42758	Deletion
1	232744398	232749006	4609	Hemizygous deletion	2	38275734	38277274	1541	Gain	1	166979414	167060888	81475	Duplication
1	274148429	274169446	21018	Hemizygous deletion	2	40924005	41000357	76353	Loss	1	167247277	167298366	51090	Deletion
1	110341316	110380268	38953	Duplication	2	41148062	41162530	14469	Loss	1	167257894	167298366	40473	Deletion
1	20250231	20261701	11471	Hemizygous deletion	2	41402296	41420214	17919	Loss	1	167289683	167340755	51073	Deletion
1	48714284	48737145	22862	Hemizygous deletion	2	42788158	42797557	9400	Loss	1	167361883	167399922	38040	Deletion
1	56349126	56393426	44301	Hemizygous deletion	2	42827337	42878529	51193	Loss	1	167361883	167402591	40709	Deletion
1	79949118	79967902	18785	Hemizygous deletion	2	43186684	43201628	14945	Loss	1	167361883	167407378	45496	Deletion
1	131492711	131593432	100722	Hemizygous deletion	2	43254907	43311086	56180	Loss	1	167407378	167539036	131659	Deletion
1	159205595	159208067	2473	Hemizygous deletion	2	43342791	43355405	12615	Loss	1	167484755	167523982	39228	Deletion
1	166569873	166611334	41462	Hemizygous deletion	2	43926525	43939908	13384	Loss	1	167779367	167870195	90829	Deletion
1	220956025	220981851	25827	Hemizygous deletion	2	45536255	45568626	32372	Loss	1	167927191	167978245	51055	Deletion
1	79949118	79969746	20629	Homozygous deletion	2	45974596	45993305	18710	Loss	1	168350490	168359519	9030	Duplication
1	553722	563419	9698	Hemizygous deletion	2	48021346	48024266	2921	Gain	1	1688376	1701628	13253	Deletion
1	17855650	17866785	11136	Hemizygous deletion	2	49379849	49381803	1955	Loss	1	169435079	169439658	4580	Deletion
1	99936708	99938002	1295	Duplication	2	50987477	51018203	30727	Gain	1	171974379	171980780	6402	Deletion
1	101087151	101089961	2811	Duplication	2	51484176	51491308	7133	Loss	1	172458461	172468191	9731	Deletion
1	110269586	110387808	118223	Duplication	2	51583376	51589001	5626	Loss	1	172653528	172656801	3274	Duplication
1	117042642	117048230	5589	Homozygous deletion	2	51769155	51786225	17071	Loss	1	173133795	173190665	56871	Deletion
1	1642222	1646902	4681	Hemizygous deletion	2	52302072	52307392	5321	Loss	1	173287738	173290639	2902	Deletion
1	110273323	110282554	9232	Duplication	2	53553764	53580206	26443	Loss	1	173407605	173536722	129118	Deletion
1	110347990	110387808	39819	Duplication	2	53878671	53883924	5254	Loss	1	173512455	173567358	54904	Deletion
1	1642222	1646902	4681	Hemizygous deletion	2	54185440	54199530	14091	Loss	1	1741492	1754908	13417	Deletion
1	110599329	110619181	19853	Hemizygous deletion	2	54528037	54549278	21242	Loss	1	175184020	175262681	78662	Deletion
1	150512915	150544234	31320	Hemizygous deletion	2	55790392	55836388	45997	Loss	1	175216187	175233064	16878	Deletion
1	1449868	1452350	2483	Duplication	2	58102875	58156227	53353	Gain	1	175346709	175349697	2989	Duplication
1	110248531	110282554	34024	Duplication	2	60375954	60380886	4933	Loss	1	177783210	177797823	14614	Deletion
1	110320165	110387808	67644	Duplication	2	60815553	60824253	8701	Loss	1	17796999	17814737	17739	Deletion
1	1086441	1090493	4053	Homozygous deletion	2	61323260	61333303	10044	Loss	1	177977899	177980128	2230	Deletion
1	110572272	110586201	13930	Hemizygous deletion	2	62363822	62404100	40279	Loss	1	17817532	17819759	2228	Duplication
1	234738957	234742228	3272	Hemizygous deletion	2	62599435	62683483	84049	Loss	1	17852861	17866785	13925	Deletion
1	274148429	274169446	21018	Hemizygous deletion	2	62823130	62828549	5420	Loss	1	17855650	17866785	11136	Deletion
1	28754310	28769987	15678	Hemizygous deletion	2	65216762	65220965	4204	Loss	1	1786508	1813994	27487	Duplication
1	57774205	57793716	19512	Hemizygous deletion	2	66781667	66792113	10447	Gain	1	179071199	179150800	79602	Deletion
1	110572272	110599329	27058	Hemizygous deletion	2	67179710	67182954	3245	Loss	1	179168766	179193763	24998	Deletion
1	197650016	197668669	18654	Hemizygous deletion	2	70028970	70030019	1050	Gain	1	17972728	18039883	67156	Duplication
1	79949118	79969746	20629	Homozygous deletion	2	70644667	70664007	19341	Gain	1	17991389	18008770	17382	Deletion
1	65569509	65657247	87739	Hemizygous deletion	2	72973549	73008454	34906	Loss	1	17995659	18007552	11894	Deletion
1	65794589	65845642	51054	Hemizygous deletion	2	73846005	73864152	18148	Loss	1	17995659	18008770	13112	Deletion
1	129130886	129137871	6986	Hemizygous deletion	2	74001948	74143129	141182	Gain	1	180140973	180148812	7840	Deletion
1	274140079	274169446	29368	Hemizygous deletion	2	74591101	74629628	38528	Gain	1	180147215	180148812	1598	Deletion
1	117042642	117048230	5589	Homozygous deletion	2	75164741	75166387	1647	Loss	1	180834387	180851265	16879	Deletion
1	274140079	274169446	29368	Hemizygous deletion	2	75694558	75704996	10439	Loss	1	180839231	180851265	12035	Deletion
1	110248531	110295948	47418	Duplication	2	75781435	75793708	12274	Loss	1	181721685	181767833	46149	Deletion
1	110375419	110387808	12390	Duplication	2	77365834	77367979	2146	Gain	1	183861352	184033644	172293	Deletion
1	274140079	274169446	29368	Hemizygous deletion	2	77732470	77778907	46438	Loss	1	183924277	183958037	33761	Deletion
1	274148429	274169446	21018	Hemizygous deletion	2	77796983	77835093	38111	Loss	1	185112942	185122413	9472	Deletion
1	65759202	65788893	29692	Duplication	2	77886874	77898564	11691	Loss	1	185614760	185621126	6367	Deletion
1	79949118	79969664	20547	Homozygous deletion	2	78228947	78287199	58253	Loss	1	185614760	185625895	11136	Deletion
1	65562670	65627908	65239	Hemizygous deletion	2	78742260	79069093	326834	Loss	1	187687278	187696314	9037	Deletion
1	65794589	65856555	61967	Hemizygous deletion	2	79238294	79413349	175056	Loss	1	188114685	188138778	24094	Deletion
1	231110633	231116566	5934	Hemizygous deletion	2	79487898	79621867	133970	Loss	1	188134688	188138778	4091	Deletion
1	44340823	44349255	8433	Duplication	2	79734685	79748262	13578	Loss	1	188368558	188382342	13785	Deletion
1	274140079	274169446	29368	Hemizygous deletion	2	79760588	79784673	24086	Loss	1	188389985	188409354	19370	Deletion
1	23810357	23814185	3829	Duplication	2	80035305	80168574	133270	Loss	1	188400249	188409354	9106	Deletion
1	117042642	117048230	5589	Duplication	2	80185861	80197725	11865	Loss	1	188589558	188598986	9429	Duplication
1	117042642	117059022	16381	Homozygous deletion	2	80250993	80263984	12992	Loss	1	189246818	189252820	6003	Deletion
1	28748558	28769987	21430	Hemizygous deletion	2	80294495	80338868	44374	Gain	1	189251213	189252820	1608	Deletion
1	130731839	130741948	10110	Hemizygous deletion	2	82429076	82467940	38865	Loss	1	189486975	189490698	3724	Duplication
1	1449868	1452350	2483	Duplication	2	83043831	83046285	2455	Gain	1	189559216	189579918	20703	Deletion
1	51254967	51273933	18967	Duplication	2	85090152	85348837	258686	Loss	1	189562724	189579918	17195	Deletion
1	34487159	34503450	16292	Homozygous deletion	2	86356738	86362585	5848	Gain	1	189572009	189579918	7910	Deletion
1	149345248	149349488	4241	Homozygous deletion	2	87269397	87292175	22779	Loss	1	189573514	189579918	6405	Deletion
1	79458715	79465235	6521	Hemizygous deletion	2	87393709	87415488	21780	Loss	1	190262119	190289125	27007	Duplication
1	146553279	146579886	26608	Hemizygous deletion	2	90020471	90073012	52542	Loss	1	190262119	190293504	31386	Duplication
1	150512915	150544234	31320	Hemizygous deletion	2	90117921	90152087	34167	Loss	1	190282963	190293504	10542	Duplication
1	157251211	157335919	84709	Hemizygous deletion	2	90422576	90457824	35249	Loss	1	191332321	191341306	8986	Deletion
1	229406490	229438690	32201	Hemizygous deletion	2	90577401	90763395	185995	Loss	1	191334961	191341306	6346	Deletion
1	110238914	110276990	38077	Duplication	2	90809073	90810170	1098	Gain	1	19236889	19247684	10796	Deletion
1	261133642	261140480	6839	Hemizygous deletion	2	91626103	91629281	3179	Gain	1	192390505	192482099	91595	Deletion
1	189486975	189490698	3724	Duplication	2	92547326	92603131	55806	Loss	1	19239250	19251685	12436	Deletion
1	130731839	130743004	11166	Hemizygous deletion	2	92726697	92791437	64741	Loss	1	19239250	19252867	13618	Deletion
1	149345248	149349488	4241	Hemizygous deletion	2	94652822	94684737	31916	Loss	1	193554101	193569506	15406	Deletion
1	154083063	154085168	2106	Hemizygous deletion	2	96320076	96338270	18195	Loss	1	193554101	193572148	18048	Deletion
1	220286059	220293891	7833	Hemizygous deletion	2	96448182	96454943	6762	Loss	1	193829523	193839074	9552	Duplication
1	259520908	259580523	59616	Hemizygous deletion	2	96901490	96904080	2591	Loss	1	194055271	194078405	23135	Duplication
1	110238914	110391978	153065	Duplication	2	97203862	97296805	92944	Loss	1	194056913	194078405	21493	Duplication
1	150512915	150544234	31320	Homozygous deletion	2	98184611	98216544	31934	Gain	1	194057622	194086474	28853	Duplication
1	154083063	154085168	2106	Homozygous deletion	2	98242728	98272921	30194	Loss	1	194235823	194297124	61302	Deletion
1	274140079	274169446	29368	Homozygous deletion	2	98510539	98525061	14523	Loss	1	194254721	194256084	1364	Duplication
1	153615898	153630638	14741	Hemizygous deletion	2	98828781	98861485	32705	Loss	1	194555365	194597506	42142	Deletion
1	259542804	259575290	32487	Hemizygous deletion	2	99064557	99107312	42756	Loss	1	19515981	19636191	120211	Deletion
1	98430500	98437914	7415	Duplication	2	99158848	99179574	20727	Loss	1	19634486	19636191	1706	Deletion
1	117042642	117048230	5589	Homozygous deletion	2	99257093	99318393	61301	Loss	1	197642199	197664640	22442	Deletion
1	149345248	149349488	4241	Homozygous deletion	2	99590385	99594926	4542	Loss	1	197647946	197664640	16695	Deletion
1	123073	176918	53846	Hemizygous deletion	2	99715573	99754354	38782	Loss	1	197650016	197668669	18654	Deletion
1	297075	307655	10581	Hemizygous deletion	2	100000308	100047222	46915	Loss	1	197653538	197664640	11103	Deletion
1	553722	563419	9698	Hemizygous deletion	2	101025755	101052380	26626	Gain	1	197658345	197664640	6296	Deletion
1	729206	761240	32035	Hemizygous deletion	2	101627786	101647398	19613	Loss	1	197658345	197667834	9490	Deletion
1	15795644	15814529	18886	Hemizygous deletion	2	102416813	102430222	13410	Loss	1	197658345	197668669	10325	Deletion
1	20355515	20369907	14393	Hemizygous deletion	2	103374377	103392753	18377	Loss	1	198488958	198496709	7752	Deletion
1	116305012	116351109	46098	Hemizygous deletion	2	104885388	104918492	33105	Loss	1	19997296	19998516	1221	Deletion
1	153572140	153633919	61780	Hemizygous deletion	2	105281028	105295733	14706	Loss	1	200556276	200557639	1364	Deletion
1	262100025	262103532	3508	Hemizygous deletion	2	105653973	105658148	4176	Loss	1	200556276	200558566	2291	Deletion
1	262929087	262944748	15662	Hemizygous deletion	2	106695852	106726584	30733	Loss	1	201959216	201962495	3280	Deletion
1	271771931	271775705	3775	Hemizygous deletion	2	106748571	106784543	35973	Loss	1	201959216	201976275	17060	Deletion
1	274140079	274169446	29368	Hemizygous deletion	2	107041331	107048148	6818	Loss	1	201959216	201977495	18280	Deletion
1	110241832	110290769	48938	Duplication	2	107296607	107330885	34279	Loss	1	202205044	202266725	61682	Deletion
1	231219052	231227114	8063	Duplication	2	107456590	107468597	12008	Loss	1	20250231	20261701	11471	Deletion
1	297075	312707	15633	Hemizygous deletion	2	108039278	108056467	17190	Loss	1	202545166	202570202	25037	Deletion
1	497461	521051	23591	Hemizygous deletion	2	108113983	108118700	4718	Loss	1	203433595	203435869	2275	Duplication
1	547302	563419	16118	Hemizygous deletion	2	108135363	108145424	10062	Gain	1	20355515	20369907	14393	Deletion
1	626498	762829	136332	Hemizygous deletion	2	108378092	108382699	4608	Gain	1	20359861	20369907	10047	Deletion
1	955170	961697	6528	Hemizygous deletion	2	108665773	108723664	57892	Loss	1	20366279	20369907	3629	Deletion
1	263076116	263097101	20986	Hemizygous deletion	2	109117545	109123980	6436	Gain	1	203876551	203883658	7108	Duplication
1	110355371	110380268	24898	Duplication	2	109136593	109230596	94004	Loss	1	204390980	204436036	45057	Deletion
1	150495070	150505127	10058	Duplication	2	109424962	109621574	196613	Loss	1	204491563	204565717	74155	Deletion
1	154083063	154085168	2106	Homozygous deletion	2	109901511	109916719	15209	Gain	1	204524079	204565717	41639	Deletion
1	626498	628019	1522	Hemizygous deletion	2	111018483	111025062	6580	Loss	1	204613149	204780301	167153	Duplication
1	116305012	116351109	46098	Hemizygous deletion	2	111372994	111426216	53223	Loss	1	204645430	204647105	1676	Duplication
1	150512915	150544234	31320	Hemizygous deletion	2	111729582	111758162	28581	Gain	1	204703146	204749000	45855	Deletion
1	157248715	157335919	87205	Hemizygous deletion	2	113870456	113889207	18752	Loss	1	204716558	204749000	32443	Deletion
1	239185878	239256562	70685	Hemizygous deletion	2	114093317	114141784	48468	Loss	1	204720869	204747555	26687	Deletion
1	261522657	261531254	8598	Hemizygous deletion	2	115895548	115904839	9292	Loss	1	204720869	204748439	27571	Deletion
1	110238914	110265741	26828	Duplication	2	116471065	116478397	7333	Loss	1	204720869	204749000	28132	Deletion
1	150495070	150505127	10058	Duplication	2	116739211	116754863	15653	Loss	1	204743506	204749000	5495	Deletion
1	34487159	34503450	16292	Homozygous deletion	2	117214818	117230353	15536	Loss	1	204974736	205005575	30840	Deletion
1	154083063	154085168	2106	Homozygous deletion	2	117645826	117662716	16891	Loss	1	205122293	205132222	9930	Duplication
1	130727311	130743004	15694	Hemizygous deletion	2	118212289	118363538	151250	Loss	1	205217576	205238523	20948	Deletion
1	239181622	239256562	74941	Hemizygous deletion	2	118696623	118702737	6115	Gain	1	205980931	205999058	18128	Deletion
1	110238914	110256941	18028	Duplication	2	119023279	119024751	1473	Gain	1	2069474	2081593	12120	Deletion
1	225703623	225706025	2403	Duplication	2	119229222	119268754	39533	Loss	1	207024064	207049927	25864	Deletion
1	150512915	150544234	31320	Homozygous deletion	2	120352330	120408158	55829	Loss	1	208055217	208064201	8985	Duplication
1	599741	642757	43017	Hemizygous deletion	2	120572298	120727794	155497	Loss	1	208143967	208160018	16052	Duplication
1	153615898	153633919	18022	Hemizygous deletion	2	120791320	120804736	13417	Loss	1	20872287	20880171	7885	Deletion
1	189251213	189252820	1608	Hemizygous deletion	2	120839542	120873249	33708	Loss	1	208737837	208832526	94690	Deletion
1	263076116	263118151	42036	Hemizygous deletion	2	121027005	121041191	14187	Loss	1	208953842	208968465	14624	Deletion
1	110238914	110290769	51856	Duplication	2	121252978	121255414	2437	Loss	1	208966678	208995219	28542	Deletion
1	110375419	110387808	12390	Duplication	2	121298574	121310089	11516	Loss	1	208966678	208997210	30533	Deletion
1	110238914	110284391	45478	Duplication	2	121388987	121498801	109815	Loss	1	209514541	209533785	19245	Duplication
1	3112486	3122600	10115	Hemizygous deletion	2	123073808	123139766	65959	Loss	1	209628581	209643643	15063	Deletion
1	3417932	3419652	1721	Hemizygous deletion	2	123279828	123399858	120031	Loss	1	209628581	209652581	24001	Deletion
1	201959216	201977495	18280	Hemizygous deletion	2	123710167	123809814	99648	Loss	1	209746895	209830916	84022	Deletion
1	553722	563419	9698	Hemizygous deletion	2	123908778	124096522	187745	Loss	1	209767764	209830916	63153	Deletion
1	912612	961697	49086	Hemizygous deletion	2	124219840	124247732	27893	Loss	1	209767764	209833952	66189	Deletion
1	1220137	1236506	16370	Hemizygous deletion	2	124378112	124471740	93629	Loss	1	209821114	209845887	24774	Deletion
1	3417932	3419652	1721	Hemizygous deletion	2	124805566	124820312	14747	Loss	1	209863313	209873581	10269	Duplication
1	15807900	15817788	9889	Hemizygous deletion	2	125831269	125834548	3280	Gain	1	209863313	209875869	12557	Duplication
1	20355515	20369907	14393	Hemizygous deletion	2	126080830	126153637	72808	Loss	1	209903389	209914253	10865	Deletion
1	189572009	189579918	7910	Hemizygous deletion	2	126705954	126713943	7990	Loss	1	209970265	210031347	61083	Deletion
1	260990333	261000488	10156	Hemizygous deletion	2	127994842	128002744	7903	Loss	1	210535206	210551037	15832	Duplication
1	262929087	262944748	15662	Hemizygous deletion	2	128418581	128431036	12456	Loss	1	210544348	210551037	6690	Duplication
1	263203503	263224640	21138	Hemizygous deletion	2	129126744	129130829	4086	Loss	1	210544348	210576373	32026	Deletion
1	110290769	110387808	97040	Duplication	2	129314244	129327427	13184	Loss	1	210613956	210692409	78454	Deletion
1	30466517	30472370	5854	Homozygous deletion	2	129606397	129648597	42201	Gain	1	211179272	211212222	32951	Deletion
1	117042642	117048230	5589	Homozygous deletion	2	129866142	129908945	42804	Loss	1	211411722	211489509	77788	Deletion
1	276156	307655	31500	Hemizygous deletion	2	130266736	130268211	1476	Loss	1	212111922	212122025	10104	Duplication
1	626498	642757	16260	Hemizygous deletion	2	130351945	130357891	5947	Gain	1	21227576	21236305	8730	Duplication
1	201959216	201976275	17060	Hemizygous deletion	2	130446267	130460081	13815	Loss	1	212312049	212318134	6086	Deletion
1	110238914	110256941	18028	Duplication	2	130671451	130683051	11601	Loss	1	2142799	2148227	5429	Deletion
1	149345248	149349488	4241	Homozygous deletion	2	131999419	132016433	17015	Loss	1	2142799	2160182	17384	Deletion
1	154083063	154085168	2106	Homozygous deletion	2	132407834	132415281	7448	Gain	1	2142799	2165598	22800	Deletion
1	251790423	251819659	29237	Hemizygous deletion	2	132794120	132799395	5276	Gain	1	21463082	21479990	16909	Deletion
1	274140079	274169446	29368	Hemizygous deletion	2	132892087	132905346	13260	Loss	1	214924009	214942288	18280	Deletion
1	117042642	117048230	5589	Homozygous deletion	2	133029486	133053984	24499	Loss	1	215043287	215051554	8268	Deletion
1	62229835	62231143	1309	Hemizygous deletion	2	133622191	133623741	1551	Loss	1	2159873	2165598	5726	Deletion
1	133452792	133471650	18859	Hemizygous deletion	2	133906178	134008771	102594	Gain	1	2159873	2232076	72204	Deletion
1	150509803	150544234	34432	Hemizygous deletion	2	136925021	136933722	8702	Loss	1	216851435	216854108	2674	Duplication
1	251790423	251819659	29237	Hemizygous deletion	2	137003422	137013389	9968	Loss	1	218403846	218439225	35380	Deletion
1	125742723	125743987	1265	Homozygous deletion	2	137504212	137532273	28062	Loss	1	218515022	218581774	66753	Deletion
1	123073	988021	864949	Hemizygous deletion	2	139969750	139982091	12342	Loss	1	218648139	218742755	94617	Duplication
1	7272046	7296424	24379	Hemizygous deletion	2	140783949	140828879	44931	Loss	1	218648139	218747682	99544	Duplication
1	15795644	15814529	18886	Hemizygous deletion	2	141329889	141428763	98875	Loss	1	218930434	218964918	34485	Deletion
1	20355515	20369907	14393	Hemizygous deletion	2	141594638	141600809	6172	Loss	1	218938246	218960911	22666	Deletion
1	65600210	65611332	11123	Hemizygous deletion	2	141742780	141838638	95859	Loss	1	218938246	218964918	26673	Deletion
1	239185878	239256562	70685	Hemizygous deletion	2	142341088	142343736	2649	Loss	1	218938246	218971014	32769	Deletion
1	260279035	260291220	12186	Hemizygous deletion	2	142503993	142518703	14711	Loss	1	218956964	218964918	7955	Deletion
1	262246565	262259014	12450	Hemizygous deletion	2	143072551	143077949	5399	Loss	1	219017274	219027183	9910	Duplication
1	263772088	263801059	28972	Hemizygous deletion	2	143236824	143252878	16055	Gain	1	219582773	219633235	50463	Deletion
1	264050343	264055236	4894	Hemizygous deletion	2	143758737	143763643	4907	Gain	1	219627890	219629132	1243	Deletion
1	110253647	110391978	138332	Duplication	2	144208436	144295667	87232	Loss	1	219930645	219932713	2069	Deletion
1	626498	642757	16260	Hemizygous deletion	2	144849255	144866529	17275	Loss	1	2201105	2226349	25245	Deletion
1	185614760	185625895	11136	Hemizygous deletion	2	144948977	144984338	35362	Loss	1	220147771	220196567	48797	Deletion
1	189251213	189252820	1608	Hemizygous deletion	2	145729079	145733986	4908	Loss	1	220147771	220293891	146121	Deletion
1	253277110	253288285	11176	Hemizygous deletion	2	146070214	146102313	32100	Loss	1	220156840	220227550	70711	Deletion
1	260279035	260287374	8340	Hemizygous deletion	2	146938785	147012531	73747	Loss	1	220156840	220320982	164143	Deletion
1	261509607	261531254	21648	Hemizygous deletion	2	149099034	149118993	19960	Loss	1	220286059	220293891	7833	Deletion
1	262237960	262256885	18926	Hemizygous deletion	2	149201363	149364598	163236	Gain	1	220511845	220946924	435080	Deletion
1	263067069	263118151	51083	Hemizygous deletion	2	150226340	150229506	3167	Loss	1	220652590	220674802	22213	Deletion
1	263839238	263840396	1159	Hemizygous deletion	2	150283239	150436588	153350	Loss	1	2208797	2222288	13492	Deletion
1	117042642	117048230	5589	Homozygous deletion	2	150970862	150980852	9991	Loss	1	220956025	220972491	16467	Deletion
1	276156	312707	36552	Hemizygous deletion	2	152353027	152393517	40491	Loss	1	220956025	220981851	25827	Deletion
1	462261	707792	245532	Hemizygous deletion	2	152632772	152642401	9630	Loss	1	220991055	221049482	58428	Deletion
1	1122950	1146615	23666	Hemizygous deletion	2	152704346	152758903	54558	Loss	1	221098926	221119775	20850	Deletion
1	3112486	3125341	12856	Hemizygous deletion	2	152865267	152881607	16341	Loss	1	221098926	221129747	30822	Deletion
1	65580523	65627908	47386	Hemizygous deletion	2	153048702	153051579	2878	Gain	1	221098926	221131514	32589	Deletion
1	65794589	65810228	15640	Hemizygous deletion	2	153158997	153174329	15333	Gain	1	221151789	221603279	451491	Deletion
1	130731839	130743004	11166	Hemizygous deletion	2	153251198	153460323	209126	Loss	1	221191908	221250308	58401	Deletion
1	157248715	157335919	87205	Hemizygous deletion	2	154071095	154150308	79214	Gain	1	221219432	221245456	26025	Deletion
1	189251213	189252820	1608	Hemizygous deletion	2	154585552	154595215	9664	Gain	1	221219432	221264166	44735	Deletion
1	261133642	261140480	6839	Hemizygous deletion	2	154721399	154750707	29309	Loss	1	221448158	221471747	23590	Deletion
1	262239719	262284366	44648	Hemizygous deletion	2	155681434	155686345	4912	Loss	1	221601609	221724850	123242	Deletion
1	110255860	110387808	131949	Duplication	2	156192872	156277234	84363	Gain	1	221601609	221882695	281087	Deletion
1	297075	312707	15633	Hemizygous deletion	2	156728237	156736706	8470	Loss	1	221637554	221701051	63498	Deletion
1	786126	830477	44352	Hemizygous deletion	2	156994111	157004160	10050	Loss	1	221724850	221726163	1314	Duplication
1	10950921	10963109	12189	Hemizygous deletion	2	158437187	158455449	18263	Loss	1	221738365	221831744	93380	Deletion
1	20355515	20369907	14393	Hemizygous deletion	2	159116370	159118970	2601	Loss	1	221738365	221882695	144331	Deletion
1	65794589	65845642	51054	Hemizygous deletion	2	159454910	159466686	11777	Loss	1	221752921	222115446	362526	Deletion
1	115900720	115912570	11851	Hemizygous deletion	2	160111429	160167114	55686	Loss	1	221758935	221774218	15284	Deletion
1	259995812	259997066	1255	Hemizygous deletion	2	160190477	160230626	40150	Loss	1	221773339	221977651	204313	Deletion
1	262237960	262284366	46407	Hemizygous deletion	2	160395558	160521167	125610	Loss	1	221773339	222115446	342108	Deletion
1	271408142	271417804	9663	Hemizygous deletion	2	161141154	161169575	28422	Loss	1	221902193	221920414	18222	Deletion
1	142256291	142259540	3250	Duplication	2	161825480	161857089	31610	Gain	1	222004461	222039773	35313	Deletion
1	34487159	34503450	16292	Homozygous deletion	2	162055070	162114788	59719	Loss	1	222209414	222210908	1495	Deletion
1	76615220	76618063	2844	Hemizygous deletion	2	162928094	162932242	4149	Gain	1	222363674	222688967	325294	Deletion
1	188368558	188382342	13785	Hemizygous deletion	2	162937267	163008838	71572	Loss	1	222408556	222443784	35229	Deletion
1	189251213	189252820	1608	Hemizygous deletion	2	163679046	163721623	42578	Loss	1	222408556	222474950	66395	Deletion
1	263076116	263095623	19508	Hemizygous deletion	2	165363147	165377284	14138	Loss	1	222408556	222696773	288218	Deletion
1	117042642	117059022	16381	Homozygous deletion	2	165728091	165748811	20721	Loss	1	222410943	222443784	32842	Deletion
1	276156	307655	31500	Hemizygous deletion	2	165808024	165845514	37491	Loss	1	222431583	222468610	37028	Deletion
1	512241	563419	51179	Hemizygous deletion	2	166261975	166280497	18523	Loss	1	222443784	222474950	31167	Deletion
1	3112486	3125341	12856	Hemizygous deletion	2	166321173	166322565	1393	Gain	1	222535280	222640055	104776	Deletion
1	3417932	3419652	1721	Hemizygous deletion	2	166397359	166456854	59496	Loss	1	222640054	222671737	31684	Deletion
1	20359861	20369907	10047	Hemizygous deletion	2	166643474	166714207	70734	Loss	1	222656116	222676390	20275	Deletion
1	129130886	129137871	6986	Hemizygous deletion	2	166952674	167127852	175179	Loss	1	222656116	222688967	32852	Deletion
1	189251213	189252820	1608	Hemizygous deletion	2	167219792	167343661	123870	Loss	1	222843883	222895048	51166	Deletion
1	189573514	189579918	6405	Hemizygous deletion	2	167451159	167462154	10996	Loss	1	222904121	223011806	107686	Deletion
1	110269586	110387808	118223	Duplication	2	167564604	167600135	35532	Loss	1	222979948	223011806	31859	Deletion
1	154083063	154085168	2106	Homozygous deletion	2	167804020	167893410	89391	Loss	1	223596482	223613311	16830	Deletion
1	626498	642757	16260	Hemizygous deletion	2	167938559	168007213	68655	Loss	1	223862130	223911986	49857	Duplication
1	51375860	51592391	216532	Duplication	2	168150889	168153443	2555	Loss	1	223862130	223923882	61753	Duplication
1	110248531	110256941	8411	Duplication	2	168301669	168439570	137902	Loss	1	224698798	224715776	16979	Deletion
1	110311445	110387808	76364	Duplication	2	168549976	168661088	111113	Loss	1	225703623	225706025	2403	Duplication
1	34487159	34503450	16292	Hemizygous deletion	2	168751119	168757302	6184	Loss	1	225703623	225708934	5312	Duplication
1	107966791	107976856	10066	Hemizygous deletion	2	169113904	169163807	49904	Gain	1	225704406	225706025	1620	Duplication
1	153615898	153630638	14741	Hemizygous deletion	2	169896296	169916851	20556	Loss	1	226253194	226276407	23214	Duplication
1	209628581	209643643	15063	Hemizygous deletion	2	170087878	170089950	2073	Loss	1	227304700	227315083	10384	Deletion
1	261133642	261141262	7621	Hemizygous deletion	2	170376681	170424322	47642	Loss	1	227304700	227322687	17988	Deletion
1	117042642	117048230	5589	Homozygous deletion	2	171611750	171639057	27308	Loss	1	227495292	227551528	56237	Deletion
1	125742723	125743987	1265	Homozygous deletion	2	172471907	172479671	7765	Loss	1	228077815	228079874	2060	Duplication
1	116305012	116351109	46098	Hemizygous deletion	2	172486163	172508069	21907	Loss	1	2281498	2288659	7162	Deletion
1	189251213	189252820	1608	Hemizygous deletion	2	173804166	173830185	26020	Loss	1	228275568	228277556	1989	Deletion
1	239185878	239256562	70685	Hemizygous deletion	2	173961657	173976405	14749	Loss	1	228368658	228382825	14168	Deletion
1	262239719	262253123	13405	Hemizygous deletion	2	174314448	174388031	73584	Loss	1	229406490	229438690	32201	Deletion
1	116305012	116351109	46098	Hemizygous deletion	2	174851948	174865631	13684	Loss	1	229438114	229456326	18213	Deletion
1	132745851	132752881	7031	Hemizygous deletion	2	178453401	178476225	22825	Loss	1	23070333	23071732	1400	Duplication
1	153615898	153630638	14741	Hemizygous deletion	2	178592256	178593997	1742	Loss	1	230893583	230896826	3244	Duplication
1	239185878	239256562	70685	Hemizygous deletion	2	179051694	179081564	29871	Gain	1	231110633	231116566	5934	Deletion
1	260279035	260280899	1865	Hemizygous deletion	2	179563576	179661414	97839	Loss	1	231110633	231121156	10524	Deletion
1	263772088	263801059	28972	Hemizygous deletion	2	179827074	179892029	64956	Loss	1	231164231	231167345	3115	Deletion
1	110238914	110355371	116458	Duplication	2	180859941	180864650	4710	Loss	1	231219052	231227114	8063	Duplication
1	151988172	151991943	3772	Hemizygous deletion	2	180952463	180968840	16378	Gain	1	232066248	232080065	13818	Deletion
1	157248715	157335919	87205	Hemizygous deletion	2	181209329	181328845	119517	Gain	1	232305727	232326637	20911	Deletion
1	2958967	2971637	12671	Hemizygous deletion	2	181425802	181446791	20990	Loss	1	232662596	232668218	5623	Deletion
1	3112486	3125341	12856	Hemizygous deletion	2	181536157	181561257	25101	Loss	1	232744398	232749006	4609	Deletion
1	8060056	8069364	9309	Hemizygous deletion	2	182361204	182378608	17405	Gain	1	233702566	233729262	26697	Deletion
1	116305012	116351109	46098	Hemizygous deletion	2	182382269	182432523	50255	Gain	1	233786228	233815659	29432	Deletion
1	130731839	130743004	11166	Hemizygous deletion	2	183472925	183484281	11357	Loss	1	233794328	233813011	18684	Deletion
1	189251213	189252820	1608	Hemizygous deletion	2	184574334	184590318	15985	Loss	1	233878856	233899286	20431	Deletion
1	263772088	263802350	30263	Hemizygous deletion	2	184627868	184643607	15740	Loss	1	234204643	234217738	13096	Duplication
1	117042642	117048230	5589	Homozygous deletion	2	184816234	184819493	3260	Loss	1	234283779	234297046	13268	Deletion
1	149345248	149349488	4241	Homozygous deletion	2	185378011	185392126	14116	Gain	1	234738957	234742228	3272	Deletion
1	553722	563419	9698	Hemizygous deletion	2	185499833	185531353	31521	Loss	1	235013678	235016997	3320	Deletion
1	116296308	116351109	54802	Hemizygous deletion	2	186291525	186334530	43006	Loss	1	235354192	235372933	18742	Deletion
1	189251213	189252820	1608	Hemizygous deletion	2	186532881	186581394	48514	Loss	1	236644782	236685904	41123	Deletion
1	154083063	154085168	2106	Homozygous deletion	2	187624249	187633057	8809	Gain	1	236999406	237020166	20761	Deletion
1	231110633	231116566	5934	Homozygous deletion	2	187676189	187770185	93997	Loss	1	238017602	238030486	12885	Duplication
1	44908422	44938334	29913	Hemizygous deletion	2	188295443	188305893	10451	Loss	1	238072246	238100298	28053	Duplication
1	45167208	45226122	58915	Hemizygous deletion	2	189676518	189695425	18908	Loss	1	23810357	23814185	3829	Duplication
1	46569239	46607429	38191	Hemizygous deletion	2	189801434	190074371	272938	Loss	1	23810357	23822081	11725	Duplication
1	47026519	47035713	9195	Hemizygous deletion	2	190194575	190198479	3905	Loss	1	23810357	23827955	17599	Duplication
1	47699623	47726200	26578	Hemizygous deletion	2	190633230	190937610	304381	Loss	1	238210281	238249360	39080	Deletion
1	48980816	49047157	66342	Hemizygous deletion	2	191000005	191063655	63651	Gain	1	238320595	238426067	105473	Deletion
1	49746158	49846935	100778	Hemizygous deletion	2	191882512	191895579	13068	Loss	1	238367163	238391989	24827	Deletion
1	56245781	56393426	147646	Hemizygous deletion	2	191914159	191915841	1683	Gain	1	238612612	238620605	7994	Deletion
1	57461850	57488763	26914	Hemizygous deletion	2	191986851	191998582	11732	Loss	1	239171453	239174967	3515	Duplication
1	57767295	57789377	22083	Hemizygous deletion	2	192213056	192215123	2068	Loss	1	239180800	239220518	39719	Duplication
1	57957853	57986890	29038	Hemizygous deletion	2	192984634	193002806	18173	Loss	1	239181622	239220518	38897	Duplication
1	58893502	58912021	18520	Hemizygous deletion	2	193679810	193708469	28660	Loss	1	239181622	239256562	74941	Deletion
1	60131671	60173777	42107	Hemizygous deletion	2	193867156	193879016	11861	Loss	1	239185878	239212139	26262	Duplication
1	63045126	63115311	70186	Hemizygous deletion	2	193924415	193932326	7912	Loss	1	239185878	239220518	34641	Duplication
1	65329954	65374114	44161	Hemizygous deletion	2	194060612	194080838	20227	Loss	1	239185878	239256562	70685	Deletion
1	67720726	67806567	85842	Hemizygous deletion	2	195080867	195103590	22724	Loss	1	239185878	239266757	80880	Deletion
1	78927577	79345729	418153	Hemizygous deletion	2	195683756	195748444	64689	Loss	1	239190294	239212139	21846	Duplication
1	79871950	79884176	12227	Hemizygous deletion	2	195946074	196234126	288053	Loss	1	239190294	239256562	66269	Deletion
1	80938042	81338606	400565	Hemizygous deletion	2	196286836	196307631	20796	Loss	1	239191196	239212139	20944	Duplication
1	129755038	129828375	73338	Hemizygous deletion	2	196349558	196576095	226538	Loss	1	239557571	239561030	3460	Duplication
1	129899261	129997595	98335	Hemizygous deletion	2	196705710	196747155	41446	Loss	1	239850355	239857576	7222	Duplication
1	131637699	131744252	106554	Hemizygous deletion	2	197385000	197895553	510554	Gain	1	240305646	240361477	55832	Deletion
1	132560097	132794286	234190	Hemizygous deletion	2	200527374	200532771	5398	Loss	1	240392468	240399550	7083	Deletion
1	133561071	133586794	25724	Hemizygous deletion	2	201925770	201933463	7694	Gain	1	240558901	240584165	25265	Deletion
1	133905848	133964363	58516	Hemizygous deletion	2	202177828	202179452	1625	Loss	1	240760674	240766735	6062	Deletion
1	134524046	134555721	31676	Hemizygous deletion	2	202372639	202373940	1302	Loss	1	240888719	241200399	311681	Deletion
1	139386254	139450109	63856	Hemizygous deletion	2	203927435	203931426	3992	Gain	1	240963515	241039433	75919	Deletion
1	140978420	141051447	73028	Hemizygous deletion	2	204093033	204098706	5674	Loss	1	240974140	241047996	73857	Deletion
1	144116329	144126755	10427	Hemizygous deletion	2	204135236	204172303	37068	Loss	1	241002501	241009364	6864	Deletion
1	145816322	145843225	26904	Hemizygous deletion	2	204184216	204188593	4378	Loss	1	241039433	241047996	8564	Duplication
1	146253504	146312277	58774	Hemizygous deletion	2	204524146	204529761	5616	Loss	1	241158734	241162612	3879	Deletion
1	146382114	146436739	54626	Hemizygous deletion	2	205465316	205489305	23990	Loss	1	241158734	241196063	37330	Deletion
1	146884319	146900250	15932	Hemizygous deletion	2	209200235	209202414	2180	Gain	1	241337450	241355010	17561	Deletion
1	147892547	147904192	11646	Hemizygous deletion	2	209775617	209842741	67125	Loss	1	241427309	241445251	17943	Deletion
1	148481785	148593318	111534	Hemizygous deletion	2	209931092	209962032	30941	Loss	1	241619250	241809058	189809	Duplication
1	149005596	149069453	63858	Hemizygous deletion	2	210171937	210210814	38878	Loss	1	241632533	241655031	22499	Deletion
1	149297526	149524076	226551	Hemizygous deletion	2	210364711	210384416	19706	Loss	1	241637777	241655031	17255	Deletion
1	149562150	149643788	81639	Hemizygous deletion	2	210682618	210690654	8037	Loss	1	24172178	24234161	61984	Deletion
1	149742993	149759790	16798	Hemizygous deletion	2	211487392	211510593	23202	Loss	1	24172178	24239181	67004	Deletion
1	150177495	150248320	70826	Hemizygous deletion	2	211613372	211682198	68827	Loss	1	241807823	241828188	20366	Deletion
1	150452833	150495286	42454	Hemizygous deletion	2	211982746	212030516	47771	Loss	1	241899000	241918703	19704	Deletion
1	151235336	151278307	42972	Hemizygous deletion	2	212491652	212578244	86593	Loss	1	24200119	24234161	34043	Deletion
1	151865815	151915975	50161	Hemizygous deletion	2	212798713	212812602	13890	Loss	1	24202686	24234161	31476	Deletion
1	152159098	152176363	17266	Hemizygous deletion	2	212985002	212987862	2861	Loss	1	242059404	242300122	240719	Deletion
1	152519179	152549842	30664	Hemizygous deletion	2	213081402	213203199	121798	Loss	1	242151588	242180377	28790	Duplication
1	157949921	158003638	53718	Hemizygous deletion	2	214281647	214345011	63365	Loss	1	24216166	24234161	17996	Deletion
1	158581482	158895912	314431	Hemizygous deletion	2	214476063	214484691	8629	Loss	1	242400676	242419086	18411	Deletion
1	165246917	165275110	28194	Hemizygous deletion	2	214551032	214589893	38862	Loss	1	242438838	242441977	3140	Deletion
1	177977899	177980128	2230	Hemizygous deletion	2	214800346	214819153	18808	Loss	1	242837554	242844502	6949	Deletion
1	183924277	183958037	33761	Hemizygous deletion	2	214835632	214837338	1707	Loss	1	244125234	244205919	80686	Deletion
1	204390980	204436036	45057	Hemizygous deletion	2	214933340	214934851	1512	Loss	1	248002734	248016972	14239	Deletion
1	205217576	205238523	20948	Hemizygous deletion	2	215120425	215178938	58514	Loss	1	248027611	248040731	13121	Deletion
1	209821114	209845887	24774	Hemizygous deletion	2	215567991	215643039	75049	Loss	1	250899911	250914584	14674	Deletion
1	209970265	210031347	61083	Hemizygous deletion	2	215726908	215740258	13351	Loss	1	251790423	251819659	29237	Deletion
1	210613956	210692409	78454	Hemizygous deletion	2	217690809	217692714	1906	Gain	1	251790423	251855075	64653	Deletion
1	220147771	220293891	146121	Hemizygous deletion	2	218006512	218206281	199770	Loss	1	251833912	251855075	21164	Deletion
1	221752921	222115446	362526	Hemizygous deletion	2	218501420	218562781	61362	Loss	1	253277110	253288285	11176	Deletion
1	222408556	222696773	288218	Hemizygous deletion	2	219589707	219590970	1264	Loss	1	253666436	253680367	13932	Duplication
1	238210281	238249360	39080	Hemizygous deletion	2	220214143	220228818	14676	Gain	1	254522160	254558852	36693	Deletion
1	238320595	238426067	105473	Hemizygous deletion	2	220380358	220401489	21132	Loss	1	254522160	254565419	43260	Deletion
1	240305646	240361477	55832	Hemizygous deletion	2	220666383	220678723	12341	Gain	1	254558852	254571363	12512	Duplication
1	244125234	244205919	80686	Hemizygous deletion	2	220743805	220839787	95983	Loss	1	254578509	254579841	1333	Deletion
1	193829523	193839074	9552	Duplication	2	222112756	222144011	31256	Gain	1	255581021	255597353	16333	Duplication
1	218938246	218964918	26673	Homozygous deletion	2	223791091	223802978	11888	Gain	1	255587129	255597353	10225	Duplication
1	234283779	234297046	13268	Hemizygous deletion	2	224558504	224571179	12676	Loss	1	255744244	255749415	5172	Deletion
1	1536351	1566976	30626	Hemizygous deletion	2	224873219	224892818	19600	Gain	1	255866903	255870098	3196	Deletion
1	218938246	218960911	22666	Hemizygous deletion	2	225563504	225572631	9128	Gain	1	255868927	255870098	1172	Deletion
1	231110633	231116566	5934	Hemizygous deletion	2	225757725	225833194	75470	Loss	1	257462577	257477107	14531	Deletion
1	1452350	1471439	19090	Duplication	2	226277970	226282429	4460	Gain	1	259446862	259461363	14502	Deletion
1	29917699	29938805	21107	Hemizygous deletion	2	227311393	227327319	15927	Loss	1	259520908	259580523	59616	Deletion
1	65580523	65604876	24354	Hemizygous deletion	2	228381581	228391770	10190	Loss	1	259542804	259571695	28892	Deletion
1	65794589	65810228	15640	Hemizygous deletion	2	228531386	228592396	61011	Loss	1	259542804	259575290	32487	Deletion
1	165246917	165275110	28194	Hemizygous deletion	2	228785126	228801268	16143	Loss	1	259558489	259575290	16802	Duplication
1	110341316	110348050	6735	Monoallelic triplication	2	228985478	228992354	6877	Loss	1	259995812	259997066	1255	Deletion
1	29917699	29938805	21107	Homozygous deletion	2	229277925	229301849	23925	Loss	1	260279035	260280899	1865	Deletion
1	65794589	65810228	15640	Hemizygous deletion	2	229796836	229810296	13461	Loss	1	260279035	260287374	8340	Deletion
1	129130886	129137871	6986	Hemizygous deletion	2	232426706	232487153	60448	Loss	1	260279035	260291220	12186	Deletion
1	165255636	165275110	19475	Hemizygous deletion	2	233078087	233081430	3344	Gain	1	260865316	260876779	11464	Deletion
1	166214466	166225994	11529	Hemizygous deletion	2	233423903	233431449	7547	Loss	1	260945463	260977494	32032	Duplication
1	275323933	275401369	77437	Hemizygous deletion	2	234849961	234894398	44438	Loss	1	260990333	260998948	8616	Deletion
1	29917699	29938805	21107	Hemizygous deletion	2	234943932	234952467	8536	Loss	1	260990333	261000488	10156	Deletion
1	21227576	21236305	8730	Duplication	2	235720127	235725177	5051	Gain	1	261133642	261140480	6839	Deletion
1	29917699	29938805	21107	Hemizygous deletion	2	236334413	236578142	243730	Loss	1	261133642	261141262	7621	Deletion
1	96966302	96970804	4503	Hemizygous deletion	2	237497390	237506896	9507	Loss	1	261344665	261364015	19351	Deletion
1	129130886	129137871	6986	Hemizygous deletion	2	238530703	238576755	46053	Loss	1	261359133	261364015	4883	Deletion
1	1086441	1090493	4053	Homozygous deletion	2	239442012	239485769	43758	Gain	1	261359133	261378393	19261	Deletion
1	1536351	1566976	30626	Homozygous deletion	2	239683094	239709124	26031	Loss	1	261509607	261531254	21648	Deletion
1	56349126	56393426	44301	Hemizygous deletion	2	241455928	241476453	20526	Loss	1	261522657	261525918	3262	Deletion
1	126691683	126732612	40930	Hemizygous deletion	2	243130820	243144745	13926	Loss	1	261522657	261531254	8598	Deletion
1	132560097	132575409	15313	Hemizygous deletion	2	243761055	243848835	87781	Loss	1	262049847	262093901	44055	Deletion
1	143810580	143830905	20326	Hemizygous deletion	2	245393037	245394152	1116	Loss	1	262076637	262103532	26896	Deletion
1	166565436	166586700	21265	Hemizygous deletion	2	245529880	245556901	27022	Loss	1	262076637	262133696	57060	Deletion
1	169435079	169439658	4580	Hemizygous deletion	2	245819263	245862025	42763	Loss	1	262077179	262103532	26354	Deletion
1	189251213	189252820	1608	Hemizygous deletion	2	246049429	246056947	7519	Loss	1	262093129	262103532	10404	Deletion
1	231110633	231116566	5934	Homozygous deletion	2	246409528	246415871	6344	Loss	1	262093129	262106680	13552	Deletion
1	1536351	1566976	30626	Hemizygous deletion	2	246768188	246797153	28966	Loss	1	262098448	262103532	5085	Deletion
1	65794589	65810228	15640	Hemizygous deletion	2	246901401	246915470	14070	Loss	1	262100025	262103532	3508	Deletion
1	204720869	204747555	26687	Hemizygous deletion	2	247001390	247010475	9086	Loss	1	262130606	262133696	3091	Duplication
1	275323933	275401369	77437	Hemizygous deletion	2	247039729	247041977	2249	Loss	1	262217520	262253123	35604	Deletion
1	231110633	231116566	5934	Homozygous deletion	2	247175719	247186302	10584	Loss	1	262237960	262253123	15164	Deletion
1	1536351	1558892	22542	Hemizygous deletion	2	247315710	247326952	11243	Loss	1	262237960	262256885	18926	Deletion
1	29917699	29938805	21107	Hemizygous deletion	2	247810595	247883893	73299	Loss	1	262237960	262284366	46407	Deletion
1	275340116	275352634	12519	Hemizygous deletion	2	248046600	248087987	41388	Loss	1	262239719	262253123	13405	Deletion
1	21227576	21236305	8730	Duplication	2	248183855	248210385	26531	Loss	1	262239719	262256885	17167	Deletion
1	29917699	29938805	21107	Hemizygous deletion	2	248377929	248410899	32971	Loss	1	262239719	262284366	44648	Deletion
1	132698414	132719151	20738	Hemizygous deletion	2	248759351	248800026	40676	Loss	1	262246565	262253123	6559	Deletion
1	159146670	159163677	17008	Hemizygous deletion	3	525296	1184597	659302	Mixed	1	262246565	262256885	10321	Deletion
1	165246917	165275110	28194	Hemizygous deletion	3	1297799	1959441	661643	Mixed	1	262246565	262259014	12450	Deletion
1	231110633	231116566	5934	Hemizygous deletion	3	2197132	2288838	91707	Mixed	1	262246565	262284366	37802	Deletion
1	100043947	100053169	9223	Duplication	3	2775975	3184256	408282	Mixed	1	262279355	262339277	59923	Deletion
1	101931320	101944496	13177	Duplication	3	8358867	8383604	24738	Mixed	1	262308447	262324669	16223	Deletion
1	29917699	29938805	21107	Hemizygous deletion	3	12900382	12946329	45948	Mixed	1	262308447	262339277	30831	Deletion
1	165246917	165275110	28194	Hemizygous deletion	3	48329098	48385358	56261	Mixed	1	262423448	262426951	3504	Duplication
1	231110633	231116566	5934	Hemizygous deletion	3	53438396	53920510	482115	Mixed	1	262423448	262443419	19972	Duplication
1	276156	307655	31500	Hemizygous deletion	3	54167095	55155000	987906	Mixed	1	262425216	262443419	18204	Duplication
1	1554303	1566976	12674	Hemizygous deletion	3	59236044	59259516	23473	Mixed	1	2627438	2630826	3389	Deletion
1	165256554	165275110	18557	Hemizygous deletion	3	66530871	66615431	84561	Mixed	1	262818152	262824376	6225	Deletion
1	231110633	231116566	5934	Hemizygous deletion	3	80900628	80960154	59527	Mixed	1	262929087	262934763	5677	Deletion
1	1536351	1566976	30626	Homozygous deletion	3	88373122	88707905	334784	Mixed	1	262929087	262944748	15662	Deletion
1	129130886	129137871	6986	Homozygous deletion	3	109058003	109138172	80170	Mixed	1	263067069	263097101	30033	Deletion
1	276156	307655	31500	Hemizygous deletion	3	119156129	119223568	67440	Mixed	1	263067069	263118151	51083	Deletion
1	393614	413180	19567	Hemizygous deletion	3	119768549	119778322	9774	Mixed	1	263076116	263085392	9277	Deletion
1	553722	563419	9698	Hemizygous deletion	3	119868053	120107154	239102	Mixed	1	263076116	263095623	19508	Deletion
1	626498	642757	16260	Hemizygous deletion	3	121621125	121752530	131406	Mixed	1	263076116	263097101	20986	Deletion
1	729206	764111	34906	Hemizygous deletion	3	136880179	136894160	13982	Mixed	1	263076116	263118151	42036	Deletion
1	826294	961697	135404	Hemizygous deletion	3	158239133	158314104	74972	Mixed	1	263145648	263149897	4250	Deletion
1	2159873	2232076	72204	Hemizygous deletion	3	161904250	162048790	144541	Mixed	1	263173339	263224640	51302	Deletion
1	2281498	2288659	7162	Hemizygous deletion	3	162211509	162241869	30361	Mixed	1	263173339	263237732	64394	Deletion
1	2943259	2969580	26322	Hemizygous deletion	3	163766519	163957528	191010	Mixed	1	263185519	263224640	39122	Deletion
1	7516232	7523412	7181	Hemizygous deletion	3	163980706	164184814	204109	Mixed	1	263195056	263224640	29585	Deletion
1	20355515	20369907	14393	Hemizygous deletion	3	168682628	168752006	69379	Mixed	1	263203503	263224640	21138	Deletion
1	121220014	121241868	21855	Hemizygous deletion	3	179085833	179119608	33776	Mixed	1	263209294	263219332	10039	Deletion
1	150512915	150544234	31320	Hemizygous deletion	3	179152761	179302421	149661	Mixed	1	263233654	263237732	4079	Deletion
1	165256554	165275110	18557	Hemizygous deletion	3	183886109	184149419	263311	Mixed	1	263555137	263558472	3336	Deletion
1	189251213	189252820	1608	Hemizygous deletion	3	203703317	203794242	90926	Mixed	1	263772088	263801059	28972	Deletion
1	260279035	260291220	12186	Hemizygous deletion	3	203855146	204082043	226898	Mixed	1	263772088	263802350	30263	Deletion
1	261133642	261141262	7621	Hemizygous deletion	3	205326084	205480682	154599	Mixed	1	263772088	263811327	39240	Deletion
1	261344665	261364015	19351	Hemizygous deletion	3	206768349	206880308	111960	Mixed	1	263772088	263840396	68309	Deletion
1	263173339	263224640	51302	Hemizygous deletion	3	207627488	207652986	25499	Mixed	1	263784193	263811327	27135	Deletion
1	263772088	263811327	39240	Hemizygous deletion	3	216149530	216163961	14432	Mixed	1	263797082	263801059	3978	Deletion
1	1536351	1566976	30626	Homozygous deletion	3	217673711	217808786	135076	Mixed	1	263839238	263840396	1159	Deletion
1	13927068	13931338	4271	Hemizygous deletion	3	220040195	220341455	301261	Mixed	1	263924931	263927442	2512	Deletion
1	14665662	14670121	4460	Hemizygous deletion	3	223222127	223329192	107066	Mixed	1	263924931	263944017	19087	Deletion
1	20359861	20369907	10047	Hemizygous deletion	3	223677441	223743624	66184	Mixed	1	264050343	264055236	4894	Deletion
1	29917699	29938805	21107	Hemizygous deletion	3	130944	144010	13067	Loss	1	264052211	264057275	5065	Duplication
1	65604153	65627908	23756	Hemizygous deletion	3	258631	297502	38872	Loss	1	264521706	264529677	7972	Duplication
1	65794589	65810228	15640	Hemizygous deletion	3	366945	384045	17101	Loss	1	264536490	264566079	29590	Deletion
1	103570503	103581305	10803	Hemizygous deletion	3	1213520	1222296	8777	Loss	1	264549692	264567633	17942	Deletion
1	165256554	165275110	18557	Hemizygous deletion	3	2013119	2018858	5740	Loss	1	264549692	264584281	34590	Deletion
1	231110633	231116566	5934	Hemizygous deletion	3	2148844	2153687	4844	Loss	1	26580439	26695660	115222	Deletion
1	262818152	262824376	6225	Hemizygous deletion	3	2309915	2349272	39358	Loss	1	26674107	26695660	21554	Deletion
1	263173339	263237732	64394	Hemizygous deletion	3	2409041	2496586	87546	Loss	1	269282058	269286909	4852	Duplication
1	263555137	263558472	3336	Hemizygous deletion	3	2657997	2660999	3003	Loss	1	269286224	269342004	55781	Duplication
1	263772088	263801059	28972	Hemizygous deletion	3	2678743	2719379	40637	Loss	1	269293226	269299273	6048	Duplication
1	275323933	275352634	28702	Hemizygous deletion	3	3274985	3348026	73042	Loss	1	269293226	269309413	16188	Duplication
1	1536351	1558892	22542	Hemizygous deletion	3	3397915	3543055	145141	Loss	1	269293226	269321568	28343	Duplication
1	29917699	29938805	21107	Hemizygous deletion	3	3587524	3603156	15633	Gain	1	269294950	269299273	4324	Duplication
1	81124536	81135424	10889	Hemizygous deletion	3	3672600	3728450	55851	Loss	1	269294950	269342004	47055	Duplication
1	129130886	129137871	6986	Hemizygous deletion	3	5096085	5112466	16382	Loss	1	269297835	269342004	44170	Duplication
1	231110633	231116566	5934	Hemizygous deletion	3	5224336	5248623	24288	Loss	1	269342004	269356407	14404	Duplication
1	65556345	65604876	48532	Homozygous deletion	3	5513239	5519745	6507	Loss	1	269362323	269363647	1325	Duplication
1	65681110	65693402	12293	Homozygous deletion	3	5592704	5606841	14138	Gain	1	269362323	269371573	9251	Duplication
1	65794589	65822552	27964	Homozygous deletion	3	6117862	6156087	38226	Loss	1	269362323	269399257	36935	Duplication
1	275323933	275373251	49319	Homozygous deletion	3	6925606	6934723	9118	Loss	1	269455351	269620952	165602	Deletion
1	297075	312707	15633	Hemizygous deletion	3	6975555	6999875	24321	Loss	1	27043519	27074805	31287	Duplication
1	29917699	29938805	21107	Hemizygous deletion	3	7147363	7157064	9702	Loss	1	27043519	27103785	60267	Duplication
1	102806607	102811207	4601	Hemizygous deletion	3	7268640	7280563	11924	Loss	1	27043519	27112825	69307	Duplication
1	109119749	109146652	26904	Hemizygous deletion	3	7300275	7315530	15256	Loss	1	27044617	27082284	37668	Duplication
1	187687278	187696314	9037	Hemizygous deletion	3	7459596	7467150	7555	Gain	1	27044617	27097748	53132	Duplication
1	231110633	231116566	5934	Hemizygous deletion	3	7552163	7557303	5141	Loss	1	27044617	27103785	59169	Duplication
1	21227576	21236305	8730	Duplication	3	7750502	7766455	15954	Loss	1	27055583	27082284	26702	Duplication
1	129130886	129137871	6986	Homozygous deletion	3	7893267	7975630	82364	Loss	1	27055583	27086979	31397	Duplication
1	297075	307655	10581	Hemizygous deletion	3	8044554	8068899	24346	Loss	1	27055583	27103785	48203	Duplication
1	826294	936029	109736	Hemizygous deletion	3	8113277	8164575	51299	Loss	1	27055583	27108215	52633	Duplication
1	3417932	3419652	1721	Hemizygous deletion	3	8473088	8522240	49153	Loss	1	27055583	27112825	57243	Duplication
1	29917699	29938805	21107	Hemizygous deletion	3	8538625	8552412	13788	Loss	1	27068373	27103785	35413	Duplication
1	262076637	262103532	26896	Hemizygous deletion	3	10355127	10363007	7881	Gain	1	27068373	27108215	39843	Deletion
1	275323933	275352634	28702	Hemizygous deletion	3	10401528	10436445	34918	Loss	1	271055840	271063257	7418	Deletion
1	100046417	100053169	6753	Duplication	3	11864518	11870209	5692	Loss	1	271408142	271417804	9663	Deletion
1	193829523	193839074	9552	Duplication	3	12250430	12264059	13630	Loss	1	271470163	271472789	2627	Duplication
1	117042642	117048230	5589	Homozygous deletion	3	12328436	12342462	14027	Gain	1	271771931	271775705	3775	Deletion
1	65794589	65810228	15640	Hemizygous deletion	3	12496447	12507347	10901	Loss	1	271942805	271975014	32210	Deletion
1	96966302	96970804	4503	Hemizygous deletion	3	13070722	13136653	65932	Loss	1	272998574	273001836	3263	Deletion
1	114842515	114852539	10025	Hemizygous deletion	3	13935090	13942475	7386	Loss	1	273191450	273195336	3887	Duplication
1	129130886	129137871	6986	Hemizygous deletion	3	20307672	20661472	353801	Gain	1	274101146	274115675	14530	Deletion
1	274148429	274181505	33077	Hemizygous deletion	3	21278834	21316399	37566	Loss	1	274140079	274161923	21845	Deletion
1	592220	599741	7522	Duplication	3	22359393	22363450	4058	Gain	1	274140079	274169446	29368	Deletion
1	117042642	117048230	5589	Homozygous deletion	3	23194470	23224403	29934	Loss	1	274140079	274181505	41427	Deletion
1	150512915	150536898	23984	Hemizygous deletion	3	23699010	23897046	198037	Gain	1	274140079	274182063	41985	Deletion
1	166578710	166611334	32625	Hemizygous deletion	3	25187468	25190810	3343	Loss	1	274148429	274169446	21018	Deletion
1	110375419	110387808	12390	Duplication	3	25407303	25430764	23462	Loss	1	274148429	274181505	33077	Deletion
1	96966302	96970804	4503	Homozygous deletion	3	26796249	26819743	23495	Loss	1	274158714	274169446	10733	Deletion
1	117042642	117059022	16381	Homozygous deletion	3	27702330	27713910	11581	Gain	1	274158714	274182063	23350	Deletion
1	132698414	132719151	20738	Hemizygous deletion	3	29612732	29665827	53096	Loss	1	274161781	274169446	7666	Deletion
1	146553279	146579886	26608	Hemizygous deletion	3	31259673	31264244	4572	Loss	1	274161781	274181505	19725	Deletion
1	167361883	167402591	40709	Hemizygous deletion	3	33471992	33475031	3040	Loss	1	274181505	274192630	11126	Deletion
1	110375419	110387808	12390	Duplication	3	33734080	33753710	19631	Gain	1	274455329	274465484	10156	Duplication
1	145783486	145792665	9180	Hemizygous deletion	3	34044660	34055851	11192	Gain	1	274731717	274753560	21844	Deletion
1	152969982	152985569	15588	Hemizygous deletion	3	35717014	35735535	18522	Loss	1	274734531	274753560	19030	Deletion
1	242059404	242300122	240719	Hemizygous deletion	3	36224485	36299687	75203	Loss	1	275323933	275352634	28702	Deletion
1	110293854	110387808	93955	Duplication	3	38055877	38102242	46366	Loss	1	275323933	275373251	49319	Deletion
1	133403009	133419220	16212	Duplication	3	38197305	38207058	9754	Loss	1	275323933	275401369	77437	Deletion
1	146553279	146579886	26608	Homozygous deletion	3	40176069	40182837	6769	Gain	1	275340116	275352634	12519	Deletion
1	130731839	130750525	18687	Hemizygous deletion	3	40672321	40680457	8137	Loss	1	276156	312707	36552	Deletion
1	132698414	132719151	20738	Hemizygous deletion	3	41714993	41730951	15959	Loss	1	276156	356863	80708	Deletion
1	110346851	110387808	40958	Duplication	3	41833824	41856210	22387	Loss	1	28217137	28236214	19078	Deletion
1	34487159	34503450	16292	Homozygous deletion	3	43005354	43041309	35956	Loss	1	28217137	28241351	24215	Deletion
1	65569509	65627908	58400	Hemizygous deletion	3	43369566	43428865	59300	Gain	1	28748558	28769987	21430	Deletion
1	65794589	65810228	15640	Hemizygous deletion	3	43512647	43520218	7572	Loss	1	28754310	28769987	15678	Deletion
1	110238914	110276990	38077	Duplication	3	43546071	43547492	1422	Gain	1	2943259	2969580	26322	Deletion
1	29917699	29942555	24857	Hemizygous deletion	3	46102458	46113128	10671	Gain	1	2949884	2961710	11827	Deletion
1	125200234	125220248	20015	Hemizygous deletion	3	46166484	46218320	51837	Loss	1	2949884	2971637	21754	Deletion
1	146553279	146579886	26608	Hemizygous deletion	3	46586381	46667618	81238	Loss	1	2949884	2974971	25088	Deletion
1	150771493	150846526	75034	Hemizygous deletion	3	46820570	46859240	38671	Loss	1	2958967	2971637	12671	Deletion
1	110269586	110295948	26363	Duplication	3	46903577	46921626	18050	Loss	1	297075	307655	10581	Deletion
1	110346851	110387808	40958	Duplication	3	46967902	46969782	1881	Gain	1	297075	312707	15633	Deletion
1	5064113	5070386	6274	Hemizygous deletion	3	47061069	47080363	19295	Loss	1	297075	394236	97162	Deletion
1	29917699	29938805	21107	Hemizygous deletion	3	47089467	47091201	1735	Gain	1	29917699	29930059	12361	Deletion
1	65562670	65627522	64853	Hemizygous deletion	3	47100561	47127360	26800	Loss	1	29917699	29933554	15856	Deletion
1	65794589	65845642	51054	Hemizygous deletion	3	47256035	47259495	3461	Loss	1	29917699	29938805	21107	Deletion
1	130731839	130741948	10110	Hemizygous deletion	3	47667492	48199729	532238	Loss	1	29917699	29942555	24857	Deletion
1	132698414	132719151	20738	Hemizygous deletion	3	48242332	48264174	21843	Loss	1	29917699	29949152	31454	Deletion
1	146553279	146579886	26608	Hemizygous deletion	3	48533432	48763095	229664	Loss	1	29930004	29938805	8802	Deletion
1	110269586	110282554	12969	Duplication	3	49162589	49265949	103361	Loss	1	30466517	30472370	5854	Deletion
1	110337752	110387808	50057	Duplication	3	49323892	49480055	156164	Loss	1	3112486	3122600	10115	Deletion
1	130731839	130741948	10110	Homozygous deletion	3	52286034	52347863	61830	Loss	1	3112486	3125341	12856	Deletion
1	231110633	231116566	5934	Homozygous deletion	3	52357758	52368709	10952	Loss	1	3254292	3271788	17497	Deletion
1	62229835	62231143	1309	Hemizygous deletion	3	52513842	52541149	27308	Loss	1	3394581	3397184	2604	Deletion
1	81217593	81223619	6027	Hemizygous deletion	3	52776969	52786131	9163	Gain	1	3417932	3419652	1721	Deletion
1	116637047	116655000	17954	Hemizygous deletion	3	53143445	53177385	33941	Loss	1	3417932	3436288	18357	Deletion
1	166586579	166611334	24756	Hemizygous deletion	3	53232018	53372336	140319	Loss	1	34288483	34294041	5559	Duplication
1	110238914	110355371	116458	Duplication	3	54045899	54084186	38288	Loss	1	34487159	34497997	10839	Deletion
1	29930004	29938805	8802	Hemizygous deletion	3	55363581	55370925	7345	Loss	1	34487159	34503450	16292	Deletion
1	146553279	146579886	26608	Hemizygous deletion	3	55908131	55930206	22076	Loss	1	34497997	34503450	5454	Deletion
1	152969982	152985569	15588	Hemizygous deletion	3	56021258	56029172	7915	Gain	1	34578862	34588486	9625	Deletion
1	112840469	112845132	4664	Hemizygous deletion	3	57395851	57396877	1027	Loss	1	34605245	34666982	61738	Deletion
1	110341316	110380268	38953	Duplication	3	59138184	59153407	15224	Loss	1	34620210	34666982	46773	Deletion
1	132698414	132719151	20738	Hemizygous deletion	3	59993889	59997124	3236	Loss	1	34867976	34887209	19234	Duplication
1	167361883	167402591	40709	Hemizygous deletion	3	60294860	60297357	2498	Gain	1	37036353	37052441	16089	Duplication
1	110238914	110295948	57035	Duplication	3	62060121	62093966	33846	Loss	1	37401835	37405688	3854	Duplication
1	110375419	110387808	12390	Duplication	3	62133356	62140582	7227	Loss	1	37511912	37527114	15203	Deletion
1	48725365	48737145	11781	Hemizygous deletion	3	62568123	62628374	60252	Loss	1	37692427	37698726	6300	Deletion
1	132698414	132719151	20738	Hemizygous deletion	3	64008547	64014130	5584	Loss	1	38230776	38255534	24759	Deletion
1	150771493	150846526	75034	Hemizygous deletion	3	66394947	66396723	1777	Gain	1	38230776	38260191	29416	Deletion
1	110290769	110380268	89500	Duplication	3	67136006	67205353	69348	Loss	1	393614	413180	19567	Deletion
1	117042642	117048230	5589	Homozygous deletion	3	67221553	67260302	38750	Loss	1	39417916	39460227	42312	Deletion
1	29917699	29933554	15856	Hemizygous deletion	3	68359176	68363837	4662	Loss	1	40085503	40092466	6964	Deletion
1	65627365	65645842	18478	Hemizygous deletion	3	68427792	68500432	72641	Loss	1	40085503	40098814	13312	Deletion
1	130727311	130750525	23215	Hemizygous deletion	3	68510983	68524770	13788	Loss	1	406849	419044	12196	Deletion
1	132698414	132719151	20738	Hemizygous deletion	3	69302914	69305897	2984	Loss	1	40763013	40792881	29869	Deletion
1	149417773	149433322	15550	Hemizygous deletion	3	69687013	69697767	10755	Loss	1	41435860	41439072	3213	Deletion
1	150512915	150544234	31320	Hemizygous deletion	3	70164195	70179679	15485	Loss	1	4163961	4170218	6258	Duplication
1	110269586	110387808	118223	Duplication	3	71124959	71134084	9126	Loss	1	41706116	41733649	27534	Deletion
1	117042642	117059022	16381	Homozygous deletion	3	71353029	71363326	10298	Loss	1	42864076	42865375	1300	Duplication
1	150512915	150544234	31320	Homozygous deletion	3	71439710	71460559	20850	Loss	1	44413887	44416845	2959	Deletion
1	29917699	29938805	21107	Hemizygous deletion	3	71632102	72200487	568386	Loss	1	44428768	44436011	7244	Duplication
1	65794589	65810228	15640	Hemizygous deletion	3	72230657	72553944	323288	Loss	1	44666130	44712525	46396	Deletion
1	110276990	110295948	18959	Duplication	3	72567179	72616002	48824	Loss	1	44833405	44853538	20134	Deletion
1	110356846	110387808	30963	Duplication	3	73031127	73040614	9488	Loss	1	44908422	44914137	5716	Deletion
1	201959216	201976275	17060	Hemizygous deletion	3	73097776	73193356	95581	Loss	1	44908422	44938334	29913	Deletion
1	239185878	239256562	70685	Hemizygous deletion	3	73330632	73443762	113131	Loss	1	45138805	45167208	28404	Deletion
1	98401639	98465901	64263	Duplication	3	74450170	74477809	27640	Loss	1	45150077	45220164	70088	Deletion
1	110248531	110282554	34024	Duplication	3	74611190	74856346	245157	Loss	1	45167208	45226122	58915	Deletion
1	110346851	110387808	40958	Duplication	3	75521574	75524780	3207	Gain	1	455653	563419	107767	Deletion
1	117042642	117048230	5589	Homozygous deletion	3	76257109	76270958	13850	Gain	1	462261	512241	49981	Deletion
1	239181622	239256562	74941	Hemizygous deletion	3	77042088	77043857	1770	Loss	1	462261	707792	245532	Deletion
1	110355371	110387808	32438	Duplication	3	78437683	78443170	5488	Loss	1	46569239	46607429	38191	Deletion
1	34487159	34503450	16292	Homozygous deletion	3	80060457	80074682	14226	Gain	1	46569239	46643149	73911	Deletion
1	117042642	117048230	5589	Homozygous deletion	3	81187916	81192919	5004	Loss	1	46585501	46587603	2103	Deletion
1	239185878	239256562	70685	Hemizygous deletion	3	81726827	81730179	3353	Gain	1	46597795	46607429	9635	Deletion
1	110255860	110391978	136119	Duplication	3	82993529	83027327	33799	Loss	1	46841419	46854545	13127	Duplication
1	225703623	225706025	2403	Duplication	3	85441124	85447199	6076	Loss	1	47026519	47035713	9195	Deletion
1	34487159	34503450	16292	Hemizygous deletion	3	86295573	86341104	45532	Loss	1	47401492	47465016	63525	Deletion
1	49436360	49456490	20131	Hemizygous deletion	3	87163469	87168991	5523	Loss	1	47428208	47496318	68111	Deletion
1	146290411	146293367	2957	Hemizygous deletion	3	87229344	87259608	30265	Loss	1	47699623	47726200	26578	Deletion
1	149596923	149600223	3301	Hemizygous deletion	3	87755048	87861420	106373	Loss	1	47760690	47871645	110956	Deletion
1	149939565	149946562	6998	Hemizygous deletion	3	87967374	88270567	303194	Loss	1	47834485	47871645	37161	Deletion
1	158581482	158659086	77605	Hemizygous deletion	3	88734685	88757513	22829	Loss	1	48027986	48078789	50804	Deletion
1	158844951	158861071	16121	Hemizygous deletion	3	88953303	88955007	1705	Loss	1	48067195	48078789	11595	Deletion
1	160618434	160636201	17768	Hemizygous deletion	3	88999082	89018751	19670	Gain	1	48122675	48140535	17861	Deletion
1	166214466	166225994	11529	Hemizygous deletion	3	89394284	89401820	7537	Loss	1	48488727	48490661	1935	Deletion
1	219627890	219629132	1243	Hemizygous deletion	3	91703526	91727739	24214	Loss	1	48617053	48727387	110335	Deletion
1	239185878	239266757	80880	Hemizygous deletion	3	91752888	91767485	14598	Loss	1	48617053	48772498	155446	Deletion
1	110255860	110282554	26695	Duplication	3	91868636	91870873	2238	Loss	1	48621811	48657379	35569	Deletion
1	110346851	110387808	40958	Duplication	3	94701853	94704207	2355	Gain	1	48621811	48727387	105577	Deletion
1	190282963	190293504	10542	Duplication	3	94794614	94808520	13907	Loss	1	48701567	48727387	25821	Deletion
1	117042642	117048230	5589	Homozygous deletion	3	95214839	95217093	2255	Loss	1	48714284	48727387	13104	Deletion
1	95232591	95271621	39031	Hemizygous deletion	3	95760139	95772490	12352	Gain	1	48714284	48780636	66353	Deletion
1	239185878	239256562	70685	Hemizygous deletion	3	96117992	96134600	16609	Loss	1	48725365	48737145	11781	Deletion
1	166576994	166586700	9707	Duplication	3	96945743	96950227	4485	Gain	1	48725365	48778799	53435	Deletion
1	239185878	239256562	70685	Hemizygous deletion	3	97041571	97055653	14083	Loss	1	487720	500109	12390	Deletion
1	190262119	190293504	31386	Duplication	3	97246141	97262229	16089	Loss	1	487720	512241	24522	Deletion
1	204720869	204747555	26687	Homozygous deletion	3	100789374	100806303	16930	Gain	1	487720	521051	33332	Deletion
1	34487159	34503450	16292	Hemizygous deletion	3	101892968	101899147	6180	Gain	1	487720	563419	75700	Deletion
1	148593318	148625114	31797	Hemizygous deletion	3	102000738	102009994	9257	Loss	1	48980816	49047157	66342	Deletion
1	154083063	154085168	2106	Hemizygous deletion	3	102173815	102195134	21320	Loss	1	49436360	49456490	20131	Deletion
1	218956964	218964918	7955	Hemizygous deletion	3	102351404	102375154	23751	Loss	1	49436360	49521980	85621	Deletion
1	117042642	117059022	16381	Homozygous deletion	3	103125969	103128538	2570	Loss	1	49439907	49460791	20885	Deletion
1	204703146	204749000	45855	Hemizygous deletion	3	103395274	103438193	42920	Loss	1	49454828	49460791	5964	Deletion
1	221758935	221774218	15284	Hemizygous deletion	3	103990827	103994753	3927	Loss	1	49509322	49513293	3972	Deletion
1	274140079	274182063	41985	Hemizygous deletion	3	104069214	104084482	15269	Loss	1	49731406	49870483	139078	Deletion
1	110282554	110391978	109425	Duplication	3	107629938	107689084	59147	Loss	1	497461	521051	23591	Deletion
1	117042642	117048230	5589	Homozygous deletion	3	108768306	108792235	23930	Loss	1	497461	563419	65959	Deletion
1	149596923	149600223	3301	Hemizygous deletion	3	109170323	109354023	183701	Loss	1	49746158	49846935	100778	Deletion
1	158581482	158680314	98833	Hemizygous deletion	3	109382813	109482875	100063	Loss	1	49868223	49870483	2261	Deletion
1	212312049	212318134	6086	Hemizygous deletion	3	109791557	109812719	21163	Gain	1	50393154	50394209	1056	Deletion
1	239185878	239266757	80880	Hemizygous deletion	3	109870848	109877738	6891	Loss	1	50551893	50562297	10405	Deletion
1	27055583	27103785	48203	Duplication	3	109902614	110013457	110844	Loss	1	5064113	5070386	6274	Deletion
1	190262119	190289125	27007	Duplication	3	110193080	110206702	13623	Gain	1	512241	563419	51179	Deletion
1	34487159	34503450	16292	Homozygous deletion	3	110387070	110400822	13753	Loss	1	51239379	51263910	24532	Duplication
1	19515981	19636191	120211	Hemizygous deletion	3	110619638	110626034	6397	Gain	1	51244683	51259719	15037	Duplication
1	44833405	44853538	20134	Hemizygous deletion	3	111175233	111190102	14870	Loss	1	51244683	51263910	19228	Duplication
1	45138805	45167208	28404	Hemizygous deletion	3	111194914	111199879	4966	Gain	1	51244683	51281281	36599	Duplication
1	47760690	47871645	110956	Hemizygous deletion	3	112821456	112831560	10105	Loss	1	51254967	51263910	8944	Duplication
1	49436360	49521980	85621	Hemizygous deletion	3	114467991	114495882	27892	Loss	1	51254967	51273933	18967	Duplication
1	52989784	53007878	18095	Hemizygous deletion	3	114515254	114558026	42773	Loss	1	51254967	51281281	26315	Duplication
1	56349126	56481979	132854	Hemizygous deletion	3	114898957	114952771	53815	Loss	1	51331070	51340248	9179	Deletion
1	67794043	67811269	17227	Hemizygous deletion	3	115550201	115561485	11285	Loss	1	51331070	51445311	114242	Deletion
1	80741417	80855022	113606	Hemizygous deletion	3	117597967	117611030	13064	Loss	1	51331070	51472011	140942	Deletion
1	81128369	81135424	7056	Hemizygous deletion	3	117617689	117663638	45950	Gain	1	51339467	51343980	4514	Deletion
1	81677781	81740356	62576	Hemizygous deletion	3	117675932	117699489	23558	Loss	1	51375860	51449901	74042	Deletion
1	81796710	81838449	41740	Hemizygous deletion	3	117828020	117834865	6846	Loss	1	51375860	51592391	216532	Duplication
1	82376920	82412185	35266	Hemizygous deletion	3	118574232	118779896	205665	Loss	1	51792626	51805794	13169	Deletion
1	126691683	126732612	40930	Hemizygous deletion	3	119620628	119697996	77369	Loss	1	52222844	52291767	68924	Deletion
1	130426025	130500991	74967	Hemizygous deletion	3	120164780	120234964	70185	Loss	1	52989784	52993857	4074	Deletion
1	131004079	131790731	786653	Hemizygous deletion	3	120422617	120448732	26116	Loss	1	52989784	53007878	18095	Deletion
1	132306996	132575409	268414	Hemizygous deletion	3	120477573	120557443	79871	Loss	1	541751	563419	21669	Deletion
1	132745851	133049786	303936	Hemizygous deletion	3	120958780	120981550	22771	Gain	1	54547748	54568164	20417	Deletion
1	135076441	135193869	117429	Hemizygous deletion	3	121119526	121199198	79673	Loss	1	54573038	54581219	8182	Duplication
1	135531087	135611459	80373	Hemizygous deletion	3	121882863	121978416	95554	Loss	1	547302	563419	16118	Deletion
1	135950759	136024153	73395	Hemizygous deletion	3	122090161	122125547	35387	Loss	1	547302	642757	95456	Deletion
1	149934392	150509803	575412	Hemizygous deletion	3	122215109	122218833	3725	Loss	1	55233289	55247384	14096	Deletion
1	151032437	151165628	133192	Hemizygous deletion	3	122310854	122315432	4579	Loss	1	553722	563419	9698	Deletion
1	152984808	153004909	20102	Hemizygous deletion	3	122546981	122550028	3048	Loss	1	553722	628019	74298	Deletion
1	157726577	157985670	259094	Hemizygous deletion	3	122683300	122711196	27897	Loss	1	553722	642757	89036	Deletion
1	158318764	158325447	6684	Hemizygous deletion	3	122917365	123005616	88252	Loss	1	55492119	55499508	7390	Deletion
1	158506852	158565657	58806	Hemizygous deletion	3	123068060	123090589	22530	Gain	1	556382	563419	7038	Deletion
1	159057390	159119239	61850	Hemizygous deletion	3	123134630	123142272	7643	Gain	1	55716096	55792883	76788	Deletion
1	159295307	159307091	11785	Hemizygous deletion	3	123159503	123162642	3140	Loss	1	55910	67691	11782	Duplication
1	160618434	160636201	17768	Hemizygous deletion	3	123215052	123231757	16706	Loss	1	55948103	55992235	44133	Deletion
1	164082101	164181011	98911	Hemizygous deletion	3	123677407	123703200	25794	Loss	1	55966253	55987114	20862	Deletion
1	165342484	165352845	10362	Hemizygous deletion	3	126224833	126246914	22082	Loss	1	56218348	56281210	62863	Deletion
1	166790009	166814287	24279	Hemizygous deletion	3	126470710	126610166	139457	Loss	1	56245781	56393426	147646	Deletion
1	167484755	167523982	39228	Hemizygous deletion	3	126658867	126763154	104288	Loss	1	56349126	56393426	44301	Deletion
1	218515022	218581774	66753	Hemizygous deletion	3	127881023	127932137	51115	Loss	1	56349126	56407756	58631	Deletion
1	221219432	221264166	44735	Hemizygous deletion	3	128841964	128904338	62375	Loss	1	56349126	56481979	132854	Deletion
1	222408556	222696773	288218	Hemizygous deletion	3	131468013	131469955	1943	Gain	1	56357364	56393426	36063	Deletion
1	30466517	30472370	5854	Homozygous deletion	3	132170281	132274464	104184	Loss	1	56357364	56407756	50393	Deletion
1	34487159	34503450	16292	Hemizygous deletion	3	132822810	132827994	5185	Loss	1	56450424	56502203	51780	Deletion
1	48725365	48737145	11781	Hemizygous deletion	3	132921573	132950409	28837	Loss	1	56859742	56880390	20649	Deletion
1	56349126	56407756	58631	Hemizygous deletion	3	133060664	133090792	30129	Loss	1	57205114	57207539	2426	Duplication
1	95232591	95264663	32073	Hemizygous deletion	3	133224258	133243672	19415	Loss	1	57461850	57488763	26914	Deletion
1	131509979	131539307	29329	Hemizygous deletion	3	133737285	133774131	36847	Gain	1	57661307	57666773	5467	Deletion
1	132120258	132153294	33037	Hemizygous deletion	3	133944126	133991759	47634	Loss	1	57767295	57789377	22083	Deletion
1	132745851	132794286	48436	Hemizygous deletion	3	134077889	134098575	20687	Loss	1	57774205	57793716	19512	Deletion
1	133314091	133356828	42738	Hemizygous deletion	3	134104251	134105266	1016	Gain	1	57774205	57808589	34385	Deletion
1	135963567	135986742	23176	Hemizygous deletion	3	134810684	134904632	93949	Gain	1	57920769	57977443	56675	Deletion
1	146003141	146031437	28297	Hemizygous deletion	3	136279215	136281841	2627	Loss	1	57957853	57986890	29038	Deletion
1	148593318	148625114	31797	Hemizygous deletion	3	137339004	137444402	105399	Loss	1	58022278	58038164	15887	Deletion
1	158506852	158565657	58806	Hemizygous deletion	3	137762161	137861655	99495	Gain	1	58022278	58043778	21501	Deletion
1	158713070	158776303	63234	Hemizygous deletion	3	137970317	138009600	39284	Gain	1	58559447	58592429	32983	Deletion
1	166790009	166832766	42758	Hemizygous deletion	3	138476640	138487670	11031	Loss	1	58559447	58646980	87534	Deletion
1	204703146	204749000	45855	Hemizygous deletion	3	141294959	141304134	9176	Gain	1	58833946	58880553	46608	Deletion
1	110248531	110324454	75924	Duplication	3	144437466	144454697	17232	Loss	1	58840757	58854297	13541	Deletion
1	117042642	117048230	5589	Homozygous deletion	3	144975024	144990284	15261	Gain	1	58842562	58854297	11736	Deletion
1	239185878	239256562	70685	Hemizygous deletion	3	145329164	145380955	51792	Loss	1	5886376	5890315	3940	Deletion
1	110248531	110282554	34024	Duplication	3	145801697	145816174	14478	Loss	1	58893502	58912021	18520	Deletion
1	110346851	110387808	40958	Duplication	3	147035104	147078878	43775	Loss	1	59153698	59177192	23495	Deletion
1	19634486	19636191	1706	Hemizygous deletion	3	147137560	147240514	102955	Loss	1	59155065	59176143	21079	Deletion
1	46597795	46607429	9635	Hemizygous deletion	3	147260420	147477907	217488	Loss	1	592220	599741	7522	Duplication
1	81796710	81824365	27656	Hemizygous deletion	3	147542517	147574396	31880	Loss	1	59717429	59729987	12559	Deletion
1	113817005	113819423	2419	Hemizygous deletion	3	148092190	148170930	78741	Loss	1	599741	642757	43017	Deletion
1	132306996	132315705	8710	Hemizygous deletion	3	148981433	148992024	10592	Gain	1	60131671	60173777	42107	Deletion
1	132560097	132575409	15313	Hemizygous deletion	3	149084922	149144858	59937	Loss	1	60363308	60371894	8587	Deletion
1	133314091	133360594	46504	Hemizygous deletion	3	151183551	151189690	6140	Loss	1	60838767	60867735	28969	Deletion
1	149587533	149600223	12691	Hemizygous deletion	3	151310642	151321604	10963	Gain	1	60838767	60897839	59073	Deletion
1	150453302	150495286	41985	Hemizygous deletion	3	151738260	151762482	24223	Gain	1	60979811	60989778	9968	Duplication
1	152967651	152985569	17919	Hemizygous deletion	3	153185618	153236783	51166	Gain	1	62146189	62268412	122224	Deletion
1	154083063	154085168	2106	Hemizygous deletion	3	154318689	154334718	16030	Loss	1	62222929	62231143	8215	Deletion
1	158086970	158103691	16722	Hemizygous deletion	3	155655309	155747997	92689	Loss	1	62229835	62231143	1309	Deletion
1	218938246	218971014	32769	Hemizygous deletion	3	156874906	156906730	31825	Loss	1	62229835	62236498	6664	Deletion
1	239185878	239256562	70685	Hemizygous deletion	3	157595089	157610188	15100	Loss	1	62229835	62252686	22852	Deletion
1	248027611	248040731	13121	Hemizygous deletion	3	157972445	158146384	173940	Loss	1	626498	628019	1522	Deletion
1	264536490	264566079	29590	Hemizygous deletion	3	158366062	158496541	130480	Loss	1	626498	642757	16260	Deletion
1	274181505	274192630	11126	Hemizygous deletion	3	158620041	158684170	64130	Loss	1	626498	761240	134743	Deletion
1	110253647	110282554	28908	Duplication	3	158874811	158912240	37430	Loss	1	626498	762829	136332	Deletion
1	110346851	110379058	32208	Duplication	3	158940525	159225114	284590	Loss	1	62779816	62780993	1178	Deletion
1	239185878	239256562	70685	Homozygous deletion	3	159505003	159516040	11038	Loss	1	63045126	63115311	70186	Deletion
1	150512915	150536898	23984	Hemizygous deletion	3	161279732	161299584	19853	Loss	1	63077748	63092874	15127	Deletion
1	154083063	154085168	2106	Hemizygous deletion	3	161569402	161597140	27739	Loss	1	6414319	6422842	8524	Duplication
1	239185878	239256562	70685	Hemizygous deletion	3	163235697	163258124	22428	Loss	1	65007615	65043923	36309	Deletion
1	110357732	110387808	30077	Duplication	3	163466809	163514407	47599	Loss	1	65329954	65374114	44161	Deletion
1	158657484	158660150	2667	Duplication	3	163577916	163606966	29051	Loss	1	65493888	65545807	51920	Deletion
1	34487159	34503450	16292	Homozygous deletion	3	163622769	163636258	13490	Loss	1	65556345	65604876	48532	Deletion
1	146553279	146579886	26608	Hemizygous deletion	3	163713081	163757389	44309	Loss	1	65556345	65627908	71564	Deletion
1	201959216	201976275	17060	Hemizygous deletion	3	164255905	164334336	78432	Loss	1	65556345	65657247	100903	Deletion
1	239185878	239256562	70685	Hemizygous deletion	3	164356818	164596275	239458	Loss	1	65562670	65611332	48663	Deletion
1	27068373	27103785	35413	Duplication	3	166442322	166465534	23213	Gain	1	65562670	65627522	64853	Deletion
1	110248531	110256941	8411	Duplication	3	168353465	168359111	5647	Loss	1	65562670	65627908	65239	Deletion
1	110346851	110387808	40958	Duplication	3	168837007	168857833	20827	Loss	1	65562670	65645842	83173	Deletion
1	30466517	30472370	5854	Homozygous deletion	3	168910591	168921396	10806	Loss	1	65569509	65604876	35368	Deletion
1	34487159	34503450	16292	Homozygous deletion	3	168929465	168933251	3787	Gain	1	65569509	65611332	41824	Deletion
1	204720869	204747555	26687	Homozygous deletion	3	170838368	170854424	16057	Loss	1	65569509	65627399	57891	Deletion
1	239185878	239256562	70685	Homozygous deletion	3	173397390	173414182	16793	Gain	1	65569509	65627908	58400	Deletion
1	729206	747566	18361	Hemizygous deletion	3	173918385	173932321	13937	Loss	1	65569509	65657247	87739	Deletion
1	130731839	130741948	10110	Hemizygous deletion	3	174998347	175009854	11508	Loss	1	65580523	65604876	24354	Deletion
1	110244710	110256941	12232	Duplication	3	175611026	175692480	81455	Gain	1	65580523	65611332	30810	Deletion
1	117042642	117048230	5589	Duplication	3	175942540	176014923	72384	Gain	1	65580523	65627908	47386	Deletion
1	125742723	125753241	10519	Duplication	3	176268783	176290292	21510	Loss	1	65600210	65611332	11123	Deletion
1	158657484	158660150	2667	Duplication	3	176388769	176407694	18926	Loss	1	65604153	65627399	23247	Deletion
1	117042642	117048230	5589	Homozygous deletion	3	177116138	177145852	29715	Loss	1	65604153	65627908	23756	Deletion
1	49454828	49460791	5964	Hemizygous deletion	3	177740026	177776378	36353	Loss	1	65611332	65627908	16577	Duplication
1	96966302	96970804	4503	Hemizygous deletion	3	178029974	178048894	18921	Loss	1	65611332	65661847	50516	Duplication
1	239185878	239256562	70685	Hemizygous deletion	3	178232826	178238906	6081	Loss	1	65657205	65661847	4643	Deletion
1	110244710	110256941	12232	Duplication	3	180120766	180152504	31739	Gain	1	65672804	65810228	137425	Deletion
1	110375419	110387808	12390	Duplication	3	180777370	180789475	12106	Loss	1	65681110	65693402	12293	Deletion
1	130731839	130741948	10110	Homozygous deletion	3	180831319	180941051	109733	Loss	1	65704830	65717274	12445	Duplication
1	48725365	48737145	11781	Hemizygous deletion	3	181228602	181231740	3139	Loss	1	65745380	65770815	25436	Deletion
1	49436360	49456490	20131	Hemizygous deletion	3	181327694	181449590	121897	Loss	1	65759202	65788893	29692	Duplication
1	81124536	81129272	4737	Hemizygous deletion	3	181626876	181664798	37923	Loss	1	65759202	65794589	35388	Duplication
1	146553279	146579886	26608	Hemizygous deletion	3	182758797	182767665	8869	Gain	1	65770815	65794589	23775	Duplication
1	149934392	149946562	12171	Hemizygous deletion	3	182795647	182815401	19755	Gain	1	65794589	65810228	15640	Deletion
1	150484200	150489716	5517	Hemizygous deletion	3	183140571	183168200	27630	Loss	1	65794589	65822552	27964	Deletion
1	150703666	150739863	36198	Hemizygous deletion	3	183220170	183240958	20789	Gain	1	65794589	65845642	51054	Deletion
1	160900434	160969089	68656	Hemizygous deletion	3	183514444	183517589	3146	Loss	1	65794589	65856555	61967	Deletion
1	239185878	239256562	70685	Hemizygous deletion	3	183643526	183754229	110704	Loss	1	65803494	65822552	19059	Deletion
1	110273323	110295948	22626	Duplication	3	184441864	184444683	2820	Gain	1	65803494	65845642	42149	Deletion
1	34487159	34503450	16292	Hemizygous deletion	3	185001832	185118995	117164	Loss	1	65889894	65909868	19975	Deletion
1	130731839	130741948	10110	Hemizygous deletion	3	185571391	185573155	1765	Loss	1	66540738	66552319	11582	Deletion
1	239185878	239256562	70685	Hemizygous deletion	3	185609000	185630879	21880	Loss	1	67428977	67451177	22201	Deletion
1	51244683	51281281	36599	Duplication	3	185984440	186017718	33279	Loss	1	67698440	67774647	76208	Deletion
1	34487159	34503450	16292	Homozygous deletion	3	186895103	186909910	14808	Gain	1	67720726	67806567	85842	Deletion
1	218938246	218964918	26673	Homozygous deletion	3	187391578	187409164	17587	Gain	1	67770756	67774647	3892	Deletion
1	239185878	239256562	70685	Hemizygous deletion	3	187627084	187646372	19289	Gain	1	67770756	67806567	35812	Deletion
1	27044617	27103785	59169	Duplication	3	188115595	188134223	18629	Loss	1	67794043	67803093	9051	Deletion
1	110375419	110387808	12390	Duplication	3	188678341	188722871	44531	Loss	1	67794043	67806567	12525	Deletion
1	34487159	34503450	16292	Homozygous deletion	3	188929339	188931795	2457	Gain	1	67794043	67811269	17227	Deletion
1	130731839	130741948	10110	Homozygous deletion	3	190751162	190775223	24062	Loss	1	67795380	67803093	7714	Deletion
1	112517210	112544735	27526	Hemizygous deletion	3	191558136	191576479	18344	Loss	1	67795380	67811269	15890	Deletion
1	165272593	165312974	40382	Hemizygous deletion	3	191778127	191782484	4358	Loss	1	68636064	68666651	30588	Duplication
1	154083063	154085168	2106	Homozygous deletion	3	191884891	191890891	6001	Gain	1	68860478	68885581	25104	Deletion
1	34487159	34503450	16292	Hemizygous deletion	3	192488561	192497263	8703	Gain	1	69187365	69209647	22283	Deletion
1	48714284	48727387	13104	Hemizygous deletion	3	192780758	192791339	10582	Gain	1	6965571	6989486	23916	Deletion
1	56349126	56393426	44301	Hemizygous deletion	3	193120378	193127552	7175	Loss	1	7124631	7135470	10840	Duplication
1	67795380	67811269	15890	Hemizygous deletion	3	195369467	195376390	6924	Loss	1	7124631	7142538	17908	Duplication
1	80985799	81009905	24107	Hemizygous deletion	3	195653413	195678852	25440	Gain	1	7125905	7134136	8232	Duplication
1	129775431	129828375	52945	Hemizygous deletion	3	196151176	196186180	35005	Gain	1	7125905	7135470	9566	Duplication
1	131004079	131005355	1277	Hemizygous deletion	3	196277730	196302598	24869	Loss	1	715895	761240	45346	Deletion
1	146022027	146031437	9411	Hemizygous deletion	3	197465190	197469734	4545	Loss	1	72522926	72530400	7475	Deletion
1	146553279	146579886	26608	Hemizygous deletion	3	198380328	198412531	32204	Gain	1	7272046	7296424	24379	Deletion
1	148593318	148625114	31797	Hemizygous deletion	3	204368091	204406187	38097	Loss	1	729206	746152	16947	Deletion
1	149934392	149954213	19822	Hemizygous deletion	3	204495443	204513061	17619	Loss	1	729206	747566	18361	Deletion
1	150703666	150747738	44073	Hemizygous deletion	3	204520201	204539184	18984	Loss	1	729206	761240	32035	Deletion
1	158775892	158790466	14575	Hemizygous deletion	3	204585324	204647557	62234	Gain	1	729206	762829	33624	Deletion
1	220956025	220972491	16467	Hemizygous deletion	3	204945419	204951383	5965	Gain	1	729206	764111	34906	Deletion
1	231110633	231116566	5934	Hemizygous deletion	3	205019925	205036989	17065	Gain	1	74094095	74107151	13057	Duplication
1	239185878	239266757	80880	Hemizygous deletion	3	205151911	205167590	15680	Loss	1	74102617	74107151	4535	Deletion
1	110269586	110295948	26363	Duplication	3	206261912	206267717	5806	Gain	1	743943	761240	17298	Deletion
1	110375419	110407995	32577	Duplication	3	206499581	206507976	8396	Gain	1	746152	764111	17960	Deletion
1	146553279	146579886	26608	Hemizygous deletion	3	206624929	206634614	9686	Gain	1	75112721	75119594	6874	Duplication
1	150512915	150544234	31320	Hemizygous deletion	3	207569823	207571059	1237	Loss	1	7516232	7523412	7181	Deletion
1	165272593	165312974	40382	Hemizygous deletion	3	207915525	207927162	11638	Gain	1	76315523	76324357	8835	Deletion
1	239185878	239256562	70685	Hemizygous deletion	3	209504929	209514120	9192	Loss	1	76615220	76618063	2844	Deletion
1	110248531	110295948	47418	Duplication	3	210649797	210701150	51354	Loss	1	77372387	77378492	6106	Deletion
1	110375419	110387808	12390	Duplication	3	210870015	210871886	1872	Gain	1	77372387	77381042	8656	Deletion
1	269293226	269321568	28343	Duplication	3	210877033	210932492	55460	Loss	1	77919664	77933717	14054	Deletion
1	239185878	239256562	70685	Homozygous deletion	3	211173751	211189269	15519	Gain	1	78125892	78226301	100410	Deletion
1	165272593	165312974	40382	Hemizygous deletion	3	211984557	212015316	30760	Loss	1	78317243	78330205	12963	Deletion
1	105741762	105744410	2649	Duplication	3	212279898	212285407	5510	Loss	1	786126	830477	44352	Deletion
1	231110633	231116566	5934	Homozygous deletion	3	212881470	212908475	27006	Loss	1	786126	836832	50707	Deletion
1	239185878	239256562	70685	Homozygous deletion	3	213283730	213299207	15478	Loss	1	78668909	78824012	155104	Deletion
1	130727311	130743004	15694	Hemizygous deletion	3	213810459	213820317	9859	Loss	1	78927577	79345729	418153	Deletion
1	160900434	160969089	68656	Hemizygous deletion	3	214593610	214602809	9200	Loss	1	78968980	79169686	200707	Deletion
1	165272593	165312974	40382	Hemizygous deletion	3	214800644	214821896	21253	Loss	1	78999650	79029818	30169	Deletion
1	255744244	255749415	5172	Hemizygous deletion	3	216655693	216701812	46120	Loss	1	79376801	79470433	93633	Deletion
1	130731839	130741948	10110	Hemizygous deletion	3	216810777	216837196	26420	Loss	1	79439516	79470433	30918	Deletion
1	239185878	239256562	70685	Hemizygous deletion	3	216861200	216869122	7923	Gain	1	79454483	79458715	4233	Deletion
1	117042642	117048230	5589	Homozygous deletion	3	217993998	218029534	35537	Loss	1	79458715	79465235	6521	Deletion
1	239185878	239256562	70685	Homozygous deletion	3	218324169	218363633	39465	Loss	1	79619444	79713055	93612	Deletion
1	130731839	130741948	10110	Hemizygous deletion	3	218449086	218613500	164415	Loss	1	79853227	79884176	30950	Deletion
1	157251211	157335919	84709	Hemizygous deletion	3	218623111	218659817	36707	Loss	1	79871950	79884176	12227	Deletion
1	165272593	165312974	40382	Hemizygous deletion	3	219065141	219071316	6176	Loss	1	79949118	79964796	15679	Deletion
1	218956964	218964918	7955	Hemizygous deletion	3	219137822	219185373	47552	Loss	1	79949118	79966649	17532	Duplication
1	93480457	93482585	2129	Duplication	3	219629354	219636730	7377	Gain	1	79949118	79967902	18785	Deletion
1	132807086	132809164	2079	Duplication	3	219960766	220001606	40841	Loss	1	79949118	79969664	20547	Deletion
1	239185878	239256562	70685	Homozygous deletion	3	220409326	220454453	45128	Gain	1	79949118	79969746	20629	Deletion
1	145787077	145792665	5589	Hemizygous deletion	3	220793123	220814510	21388	Loss	1	79964796	79969746	4951	Duplication
1	110375419	110387808	12390	Duplication	3	220860918	220909781	48864	Gain	1	80104317	80130741	26425	Deletion
1	269297835	269342004	44170	Duplication	3	220951589	220956297	4709	Loss	1	8060056	8069364	9309	Deletion
1	34487159	34503450	16292	Homozygous deletion	3	221067013	221110356	43344	Loss	1	80696526	80699462	2937	Deletion
1	117042642	117048230	5589	Homozygous deletion	3	221137430	221155682	18253	Loss	1	80723611	80855022	131412	Deletion
1	239185878	239256562	70685	Homozygous deletion	3	221496354	221504921	8568	Loss	1	80741417	80855022	113606	Deletion
1	204720869	204747555	26687	Hemizygous deletion	3	221923316	221924318	1003	Loss	1	80767374	80768504	1131	Deletion
1	242837554	242844502	6949	Hemizygous deletion	3	222007912	222034354	26443	Loss	1	80803208	80808559	5352	Deletion
1	204720869	204747555	26687	Homozygous deletion	3	222261255	222457124	195870	Loss	1	80804229	80808559	4331	Deletion
1	34487159	34503450	16292	Hemizygous deletion	3	222501307	222541030	39724	Loss	1	80924234	81009905	85672	Deletion
1	49439907	49460791	20885	Hemizygous deletion	3	222729982	222799707	69726	Loss	1	80924234	81027545	103312	Deletion
1	130731839	130743004	11166	Hemizygous deletion	3	222868382	222894614	26233	Loss	1	809317	961697	152381	Deletion
1	152436658	152442381	5724	Hemizygous deletion	3	222980088	222996710	16623	Loss	1	809317	983151	173835	Deletion
1	158630332	158669007	38676	Hemizygous deletion	3	223069131	223084770	15640	Loss	1	80938042	81027545	89504	Deletion
1	222443784	222474950	31167	Hemizygous deletion	3	223113507	223132401	18895	Loss	1	80938042	81338606	400565	Deletion
1	231110633	231116566	5934	Hemizygous deletion	3	223151035	223155751	4717	Loss	1	80985799	81009905	24107	Deletion
1	239185878	239266757	80880	Hemizygous deletion	3	223548985	223612088	63104	Loss	1	81067557	81090709	23153	Deletion
1	110269586	110282554	12969	Duplication	3	223844595	223902379	57785	Loss	1	81067557	81093910	26354	Deletion
1	110347990	110387808	39819	Duplication	4	49056	257944	208889	Mixed	1	81067557	81188540	120984	Deletion
1	239185878	239256562	70685	Homozygous deletion	4	22852029	22879594	27566	Mixed	1	81071576	81152619	81044	Deletion
1	48725365	48737145	11781	Hemizygous deletion	4	32231494	32280565	49072	Mixed	1	81124536	81129272	4737	Deletion
1	62229835	62231143	1309	Hemizygous deletion	4	32821643	32927072	105430	Mixed	1	81124536	81135424	10889	Deletion
1	130731839	130741948	10110	Hemizygous deletion	4	50075450	50092813	17364	Mixed	1	81128369	81135424	7056	Deletion
1	110248531	110293854	45324	Duplication	4	58337470	58357106	19637	Mixed	1	81280706	81350296	69591	Deletion
1	112517210	112561534	44325	Hemizygous deletion	4	72677057	73276375	599319	Mixed	1	81456601	81480539	23939	Duplication
1	130731839	130750525	18687	Hemizygous deletion	4	89682257	89773962	91706	Mixed	1	81506851	81567979	61129	Deletion
1	239185878	239256562	70685	Hemizygous deletion	4	105259990	105314189	54200	Mixed	1	81524895	81567979	43085	Deletion
1	110269586	110282554	12969	Duplication	4	105922196	105927113	4918	Mixed	1	81544321	81562519	18199	Deletion
1	110357732	110379058	21327	Duplication	4	106833552	106905946	72395	Mixed	1	81677781	81740356	62576	Deletion
1	65627365	65645842	18478	Hemizygous deletion	4	111971702	112018699	46998	Mixed	1	81700795	81711086	10292	Deletion
1	241002501	241009364	6864	Hemizygous deletion	4	112190099	112627060	436962	Mixed	1	81700795	81740356	39562	Deletion
1	241002501	241009364	6864	Homozygous deletion	4	112710596	112720069	9474	Mixed	1	817721	876527	58807	Deletion
1	129130886	129137871	6986	Hemizygous deletion	4	889463	942536	53074	Loss	1	81796710	81824365	27656	Deletion
1	150512915	150544234	31320	Hemizygous deletion	4	1003990	1017648	13659	Gain	1	81796710	81838449	41740	Deletion
1	157251211	157335919	84709	Hemizygous deletion	4	1031864	1082604	50741	Loss	1	81925353	81937551	12199	Deletion
1	231110633	231116566	5934	Hemizygous deletion	4	1336126	1399505	63380	Loss	1	81925353	81951941	26589	Deletion
1	241002501	241009364	6864	Hemizygous deletion	4	1687201	1689674	2474	Loss	1	822684	836832	14149	Deletion
1	205122293	205132222	9930	Duplication	4	1745057	1807435	62379	Loss	1	822684	890255	67572	Deletion
1	160636201	160643435	7235	Homozygous deletion	4	1965910	2017747	51838	Loss	1	822684	912612	89929	Deletion
1	241002501	241009364	6864	Hemizygous deletion	4	2075763	2184854	109092	Loss	1	82296831	82333646	36816	Duplication
1	150512915	150544234	31320	Hemizygous deletion	4	2595731	2624840	29110	Loss	1	82376920	82412185	35266	Deletion
1	157251211	157335919	84709	Hemizygous deletion	4	2668061	2669805	1745	Loss	1	82412185	82470277	58093	Deletion
1	241002501	241009364	6864	Hemizygous deletion	4	3720014	3822031	102018	Loss	1	826294	926700	100407	Deletion
1	194057622	194086474	28853	Duplication	4	3933491	3938543	5053	Gain	1	826294	936029	109736	Deletion
1	241002501	241009364	6864	Hemizygous deletion	4	4793738	4797670	3933	Loss	1	826294	961697	135404	Deletion
1	51244683	51281281	36599	Duplication	4	6351563	6386380	34818	Gain	1	82650050	82658989	8940	Duplication
1	194056913	194078405	21493	Duplication	4	6570403	6597152	26750	Gain	1	82702258	82724361	22104	Deletion
1	241002501	241009364	6864	Homozygous deletion	4	6767299	6808610	41312	Loss	1	82982220	83013747	31528	Deletion
1	274140079	274169446	29368	Homozygous deletion	4	6947455	6963947	16493	Loss	1	83002598	83013747	11150	Deletion
1	110273323	110282554	9232	Duplication	4	7004254	7012473	8220	Loss	1	83002598	83043220	40623	Deletion
1	110357732	110387808	30077	Duplication	4	8634660	8640828	6169	Gain	1	83012031	83019875	7845	Deletion
1	241002501	241009364	6864	Homozygous deletion	4	9389535	9397195	7661	Gain	1	84771179	84825773	54595	Deletion
1	51244683	51281281	36599	Duplication	4	10211133	10268015	56883	Loss	1	85640452	85641678	1227	Deletion
1	110273323	110282554	9232	Duplication	4	10324739	10354724	29986	Gain	1	85799358	85801120	1763	Deletion
1	110357732	110387808	30077	Duplication	4	10403153	10411722	8570	Gain	1	86000468	86003962	3495	Duplication
1	194055271	194078405	23135	Duplication	4	11334735	11351459	16725	Loss	1	86275425	86280837	5413	Deletion
1	241002501	241009364	6864	Hemizygous deletion	4	11995133	11999462	4330	Gain	1	8654470	8664387	9918	Deletion
1	65627365	65645842	18478	Hemizygous deletion	4	12753506	12838797	85292	Loss	1	8657009	8664387	7379	Deletion
1	157251211	157335919	84709	Hemizygous deletion	4	14123186	14132703	9518	Loss	1	86918752	86923754	5003	Deletion
1	241002501	241009364	6864	Hemizygous deletion	4	14705267	14757621	52355	Gain	1	869920	961697	91778	Deletion
1	51244683	51281281	36599	Duplication	4	15362306	15365352	3047	Loss	1	88961481	89002941	41461	Deletion
1	130731839	130741948	10110	Homozygous deletion	4	16801823	16825985	24163	Loss	1	9033837	9043267	9431	Deletion
1	14468033	14480585	12553	Hemizygous deletion	4	16884993	16905961	20969	Loss	1	905648	926700	21053	Deletion
1	51244683	51259719	15037	Duplication	4	17244800	17541724	296925	Loss	1	905648	961697	56050	Deletion
1	239185878	239256562	70685	Homozygous deletion	4	17653306	17655287	1982	Loss	1	905648	988021	82374	Deletion
1	487720	563419	75700	Hemizygous deletion	4	17707791	17800114	92324	Loss	1	90699686	90721523	21838	Deletion
1	1619087	1646288	27202	Hemizygous deletion	4	18251233	18323580	72348	Loss	1	91120086	91132787	12702	Deletion
1	13924530	13935694	11165	Hemizygous deletion	4	19310587	19332884	22298	Loss	1	91217512	91223644	6133	Deletion
1	17991389	18008770	17382	Hemizygous deletion	4	20104289	20117390	13102	Loss	1	91217512	91230093	12582	Deletion
1	20872287	20880171	7885	Hemizygous deletion	4	20428440	20444495	16056	Loss	1	91217512	91386296	168785	Deletion
1	86918752	86923754	5003	Hemizygous deletion	4	20507347	20526294	18948	Loss	1	912612	926700	14089	Deletion
1	102806607	102811207	4601	Hemizygous deletion	4	21398973	21403543	4571	Gain	1	912612	961697	49086	Deletion
1	116305012	116351109	46098	Hemizygous deletion	4	21431700	21535047	103348	Loss	1	93480457	93482585	2129	Duplication
1	1449868	1452350	2483	Duplication	4	22948042	23017657	69616	Loss	1	942349	970082	27734	Deletion
1	157248715	157335919	87205	Hemizygous deletion	4	23535872	23540100	4229	Loss	1	95232591	95264663	32073	Deletion
1	261133642	261141262	7621	Hemizygous deletion	4	26778340	26785518	7179	Loss	1	95232591	95271621	39031	Deletion
1	110238914	110290769	51856	Duplication	4	27240140	27295177	55038	Loss	1	955170	1171464	216295	Deletion
1	40085503	40092466	6964	Hemizygous deletion	4	27959559	27978144	18586	Loss	1	955170	961697	6528	Deletion
1	146553279	146579886	26608	Hemizygous deletion	4	27992234	27999417	7184	Loss	1	955170	962652	7483	Deletion
1	262093129	262106680	13552	Hemizygous deletion	4	28203743	28226020	22278	Loss	1	955170	970082	14913	Deletion
1	1449868	1452350	2483	Duplication	4	29598754	29607861	9108	Loss	1	955170	988021	32852	Deletion
1	27068373	27103785	35413	Duplication	4	30579206	30590796	11591	Loss	1	96853745	96898155	44411	Duplication
1	110375419	110387808	12390	Duplication	4	31776689	31785297	8609	Loss	1	96925620	96946562	20943	Duplication
1	208055217	208064201	8985	Duplication	4	31792717	31798439	5723	Loss	1	96966302	96970804	4503	Deletion
1	34487159	34503450	16292	Homozygous deletion	4	31833825	31839491	5667	Loss	1	96966302	96993533	27232	Duplication
1	297075	307655	10581	Hemizygous deletion	4	31937926	31971755	33830	Loss	1	97618347	97641141	22795	Duplication
1	553722	642757	89036	Hemizygous deletion	4	32354095	32421584	67490	Gain	1	979229	988021	8793	Deletion
1	261133642	261141262	7621	Hemizygous deletion	4	32500212	32530651	30440	Gain	1	98121016	98127870	6855	Duplication
1	110269586	110324454	54869	Duplication	4	32573990	32597240	23251	Gain	1	98310442	98311564	1123	Duplication
1	110355371	110380268	24898	Duplication	4	32630387	32648107	17721	Gain	1	98401639	98465901	64263	Duplication
1	34487159	34503450	16292	Homozygous deletion	4	32777969	32810655	32687	Gain	1	98430500	98437914	7415	Duplication
1	276156	307655	31500	Hemizygous deletion	4	33398900	33405937	7038	Loss	1	99936533	99938002	1470	Duplication
1	553722	563419	9698	Hemizygous deletion	4	34055411	34106731	51321	Loss	1	99936708	99938002	1295	Duplication
1	626498	642757	16260	Hemizygous deletion	4	34276890	34367284	90395	Loss	1	100046417	100053169	6753	Mixed
1	148189721	148209413	19693	Hemizygous deletion	4	34979726	35042667	62942	Loss	1	117042642	117048230	5589	Mixed
1	189251213	189252820	1608	Hemizygous deletion	4	35126699	35138461	11763	Gain	1	117042642	117059022	16381	Mixed
1	194235823	194297124	61302	Hemizygous deletion	4	36163716	36174540	10825	Loss	1	125742723	125743987	1265	Mixed
1	261133642	261140480	6839	Hemizygous deletion	4	36623180	36628036	4857	Loss	1	150526498	150544234	17737	Mixed
1	263076116	263118151	42036	Hemizygous deletion	4	36847895	36864186	16292	Loss	1	15807900	15817788	9889	Mixed
1	553722	563419	9698	Hemizygous deletion	4	37017784	37034970	17187	Loss	1	158657484	158660150	2667	Mixed
1	905648	961697	56050	Hemizygous deletion	4	37670205	37709950	39746	Loss	1	160636201	160643435	7235	Mixed
1	15708931	15718949	10019	Hemizygous deletion	4	37785153	37798643	13491	Gain	1	165349010	165352845	3836	Mixed
1	15795644	15814529	18886	Hemizygous deletion	4	38787715	38800424	12710	Loss	1	166578710	166586700	7991	Mixed
1	110375419	110387808	12390	Duplication	4	38965334	38969381	4048	Loss	1	27055583	27074805	19223	Mixed
1	65604153	65627908	23756	Hemizygous deletion	4	39150177	39153555	3379	Gain	1	27068373	27074805	6433	Mixed
1	65794589	65810228	15640	Hemizygous deletion	4	39236951	39244607	7657	Loss	1	276156	307655	31500	Mixed
1	110248531	110293854	45324	Duplication	4	39323703	39662608	338906	Loss	1	44340823	44349255	8433	Mixed
1	822684	890255	67572	Hemizygous deletion	4	40704620	41102151	397532	Gain	1	48714284	48737145	22862	Mixed
1	3112486	3125341	12856	Hemizygous deletion	4	41125170	41169777	44608	Loss	1	65627365	65635491	8127	Mixed
1	20359861	20369907	10047	Hemizygous deletion	4	41285496	41315811	30316	Loss	1	65627365	65645842	18478	Mixed
1	165349010	165352845	3836	Hemizygous deletion	4	41393314	41606708	213395	Loss	1	81217593	81223619	6027	Mixed
1	189251213	189252820	1608	Hemizygous deletion	4	41670284	41711967	41684	Loss	1	93779353	93790159	10807	Mixed
1	261522657	261531254	8598	Hemizygous deletion	4	41925350	41996891	71542	Loss	2	105084367	105087395	3029	Mixed
1	262929087	262934763	5677	Hemizygous deletion	4	42357021	42376101	19081	Loss	2	10708421	10717061	8641	Mixed
1	110375419	110387808	12390	Duplication	4	42468260	42469509	1250	Loss	2	167667211	167671556	4346	Mixed
1	34487159	34503450	16292	Homozygous deletion	4	42654026	42673365	19340	Gain	2	188205367	188211254	5888	Mixed
1	65556345	65604876	48532	Homozygous deletion	4	42776181	42795700	19520	Loss	2	245419197	245449200	30004	Mixed
1	65681110	65693402	12293	Homozygous deletion	4	45579167	45649908	70742	Loss	2	248728105	248737462	9358	Mixed
1	65794589	65822552	27964	Homozygous deletion	4	45680862	45682382	1521	Loss	2	80694582	80698463	3882	Mixed
1	125742723	125743987	1265	Homozygous deletion	4	45744075	45745678	1604	Loss	2	97607825	97611589	3765	Mixed
1	116305012	116351109	46098	Hemizygous deletion	4	46193457	46232991	39535	Loss	2	97660020	97667028	7009	Mixed
1	239190294	239256562	66269	Hemizygous deletion	4	47420081	47432418	12338	Loss	2	100000308	100019952	19645	Deletion
1	110238914	110276990	38077	Duplication	4	49889394	49896504	7111	Loss	2	100000308	100040410	40103	Deletion
1	297075	312707	15633	Hemizygous deletion	4	50317516	50322520	5005	Loss	2	100040097	100047222	7126	Deletion
1	487720	512241	24522	Hemizygous deletion	4	50965204	50986775	21572	Loss	2	101025755	101050948	25194	Duplication
1	553722	563419	9698	Hemizygous deletion	4	51777683	51785798	8116	Loss	2	101048751	101052380	3630	Duplication
1	626498	761240	134743	Hemizygous deletion	4	52274086	52311298	37213	Loss	2	101627786	101647398	19613	Deletion
1	822684	912612	89929	Hemizygous deletion	4	52636882	52665470	28589	Loss	2	102416813	102430222	13410	Deletion
1	955170	1171464	216295	Hemizygous deletion	4	53380641	53386302	5662	Gain	2	10310912	10315899	4988	Deletion
1	2159873	2165598	5726	Hemizygous deletion	4	55216036	55223203	7168	Loss	2	10310912	10315987	5076	Deletion
1	3417932	3419652	1721	Hemizygous deletion	4	56244999	56262472	17474	Loss	2	10315111	10319396	4286	Deletion
1	15807900	15814529	6630	Hemizygous deletion	4	57069542	57094606	25065	Loss	2	103374377	103377803	3427	Deletion
1	17855650	17866785	11136	Hemizygous deletion	4	57675785	57702678	26894	Loss	2	103374377	103380512	6136	Deletion
1	20355515	20369907	14393	Hemizygous deletion	4	57924697	57944755	20059	Gain	2	103374377	103384524	10148	Deletion
1	65627365	65645842	18478	Hemizygous deletion	4	58083575	58103787	20213	Loss	2	103374377	103392753	18377	Deletion
1	121265385	121275938	10554	Hemizygous deletion	4	58396196	58462630	66435	Loss	2	103374697	103380512	5816	Deletion
1	154845112	154858213	13102	Hemizygous deletion	4	58883341	58946745	63405	Loss	2	103374988	103377803	2816	Deletion
1	185614760	185621126	6367	Hemizygous deletion	4	58959138	59074630	115493	Loss	2	103374988	103380512	5525	Deletion
1	189562724	189579918	17195	Hemizygous deletion	4	59163229	59220968	57740	Loss	2	1042737	1052684	9948	Duplication
1	260279035	260280899	1865	Hemizygous deletion	4	61434359	61520361	86003	Gain	2	1045037	1054253	9217	Duplication
1	260865316	260876779	11464	Hemizygous deletion	4	61895708	61929370	33663	Loss	2	104885388	104891657	6270	Deletion
1	261133642	261141262	7621	Hemizygous deletion	4	63738258	63749625	11368	Loss	2	104885388	104918492	33105	Deletion
1	261522657	261531254	8598	Hemizygous deletion	4	65904851	65926789	21939	Loss	2	105281028	105295733	14706	Deletion
1	262076637	262133696	57060	Hemizygous deletion	4	66232370	66251360	18991	Gain	2	10545543	10547104	1562	Deletion
1	263203503	263224640	21138	Hemizygous deletion	4	66999660	67007433	7774	Gain	2	105653973	105658148	4176	Deletion
1	263772088	263840396	68309	Hemizygous deletion	4	68822152	68858115	35964	Loss	2	10612977	10630291	17315	Duplication
1	108100704	108108820	8117	Duplication	4	70497296	70509148	11853	Gain	2	106695852	106726584	30733	Deletion
1	110238914	110276990	38077	Duplication	4	72515376	72532363	16988	Gain	2	106748571	106784543	35973	Deletion
1	226253194	226276407	23214	Duplication	4	73429180	73430716	1537	Gain	2	107041331	107048148	6818	Deletion
1	117042642	117048230	5589	Homozygous deletion	4	73478328	73497031	18704	Loss	2	107296607	107310543	13937	Deletion
1	154083063	154085168	2106	Homozygous deletion	4	74463870	74562078	98209	Loss	2	107296607	107330885	34279	Deletion
1	157248715	157335919	87205	Hemizygous deletion	4	74913222	74927873	14652	Loss	2	107456590	107468597	12008	Deletion
1	110238914	110290769	51856	Duplication	4	75838100	75853282	15183	Gain	2	108039278	108056467	17190	Deletion
1	117042642	117048230	5589	Homozygous deletion	4	76517781	76565673	47893	Loss	2	108113983	108118700	4718	Deletion
1	125742723	125743987	1265	Homozygous deletion	4	77073288	77076221	2934	Loss	2	108135363	108145424	10062	Duplication
1	297075	307655	10581	Hemizygous deletion	4	77355281	77362890	7610	Gain	2	108378092	108382699	4608	Duplication
1	626498	642757	16260	Hemizygous deletion	4	78332394	78333534	1141	Gain	2	108665773	108723664	57892	Deletion
1	1642222	1646902	4681	Hemizygous deletion	4	78639891	78645989	6099	Gain	2	109117545	109123980	6436	Duplication
1	10950921	10963109	12189	Hemizygous deletion	4	79085714	79098729	13016	Loss	2	109136593	109173092	36500	Deletion
1	20366279	20369907	3629	Hemizygous deletion	4	79774798	79787455	12658	Gain	2	109136593	109176608	40016	Deletion
1	103122344	103127419	5076	Hemizygous deletion	4	81948730	81950451	1722	Gain	2	109136593	109215922	79330	Deletion
1	198488958	198496709	7752	Hemizygous deletion	4	82857529	82924348	66820	Loss	2	109182026	109230596	48571	Deletion
1	262093129	262106680	13552	Hemizygous deletion	4	83169949	83197613	27665	Loss	2	109424962	109456368	31407	Deletion
1	263233654	263237732	4079	Hemizygous deletion	4	83381832	83514420	132589	Loss	2	109454164	109474902	20739	Deletion
1	110238914	110241914	3001	Duplication	4	83592448	84347346	754899	Loss	2	109455336	109621574	166239	Deletion
1	297075	307655	10581	Hemizygous deletion	4	84490396	84500454	10059	Gain	2	109901511	109916719	15209	Duplication
1	462261	512241	49981	Hemizygous deletion	4	85936515	85940194	3680	Gain	2	111018483	111025062	6580	Deletion
1	626498	762829	136332	Hemizygous deletion	4	86119344	86140159	20816	Gain	2	111372994	111426216	53223	Deletion
1	1081128	1171464	90337	Hemizygous deletion	4	88530912	88538205	7294	Loss	2	111729582	111758162	28581	Duplication
1	3112486	3125341	12856	Hemizygous deletion	4	88816855	88827920	11066	Gain	2	1129596	1148176	18581	Deletion
1	3417932	3419652	1721	Hemizygous deletion	4	89312510	89380533	68024	Loss	2	113870456	113889207	18752	Deletion
1	8654470	8664387	9918	Hemizygous deletion	4	89564958	89602103	37146	Loss	2	114093317	114141784	48468	Deletion
1	15795644	15814529	18886	Hemizygous deletion	4	89966457	90110237	143781	Loss	2	115895548	115901116	5569	Deletion
1	96966302	96970804	4503	Hemizygous deletion	4	90401976	90425173	23198	Loss	2	115895548	115902903	7356	Deletion
1	143334830	143342551	7722	Hemizygous deletion	4	90562248	90565251	3004	Loss	2	115895548	115904839	9292	Deletion
1	189251213	189252820	1608	Hemizygous deletion	4	91417181	91451714	34534	Loss	2	116055333	116085420	30088	Deletion
1	189559216	189579918	20703	Hemizygous deletion	4	92345748	92351587	5840	Gain	2	116055333	116098190	42858	Deletion
1	260279035	260280899	1865	Hemizygous deletion	4	92859248	92900524	41277	Loss	2	116058028	116069594	11567	Deletion
1	262279355	262339277	59923	Hemizygous deletion	4	92934736	92945803	11068	Loss	2	116058028	116090225	32198	Deletion
1	263067069	263097101	30033	Hemizygous deletion	4	95040217	95063885	23669	Gain	2	116058028	116098190	40163	Deletion
1	263772088	263811327	39240	Hemizygous deletion	4	95720029	95742733	22705	Gain	2	116058028	116101155	43128	Deletion
1	65556345	65604876	48532	Homozygous deletion	4	95821149	95850140	28992	Loss	2	116066473	116098190	31718	Deletion
1	65681110	65693402	12293	Homozygous deletion	4	97733933	97736715	2783	Gain	2	116066473	116109391	42919	Deletion
1	65794589	65822552	27964	Homozygous deletion	4	97947939	97952298	4360	Gain	2	116090225	116093829	3605	Duplication
1	276156	312707	36552	Hemizygous deletion	4	98023556	98061614	38059	Loss	2	116090225	116098190	7966	Deletion
1	497461	563419	65959	Hemizygous deletion	4	98149277	98156361	7085	Loss	2	116471065	116478397	7333	Deletion
1	15708931	15722284	13354	Hemizygous deletion	4	99737900	99740643	2744	Gain	2	116739211	116754863	15653	Deletion
1	102806607	102811207	4601	Hemizygous deletion	4	105133899	105135251	1353	Gain	2	117214818	117222054	7237	Deletion
1	110238914	110256941	18028	Duplication	4	105775884	105777808	1925	Loss	2	117214818	117230353	15536	Deletion
1	110375419	110391978	16560	Duplication	4	106186311	106216124	29814	Loss	2	11762036	11773007	10972	Deletion
1	264521706	264529677	7972	Duplication	4	106509059	106518435	9377	Gain	2	11763857	11785810	21954	Deletion
1	297075	307655	10581	Hemizygous deletion	4	107541268	107591862	50595	Loss	2	117645826	117662716	16891	Deletion
1	547302	642757	95456	Hemizygous deletion	4	107864838	107872947	8110	Loss	2	118212289	118286109	73821	Deletion
1	729206	762829	33624	Hemizygous deletion	4	107951736	108048344	96609	Loss	2	118212289	118363538	151250	Deletion
1	3417932	3419652	1721	Hemizygous deletion	4	108169083	108382634	213552	Loss	2	118228543	118286109	57567	Deletion
1	20359861	20369907	10047	Hemizygous deletion	4	108850376	108886226	35851	Loss	2	118271763	118286109	14347	Deletion
1	261133642	261141262	7621	Hemizygous deletion	4	109967335	110007305	39971	Loss	2	118696623	118702737	6115	Duplication
1	262246565	262256885	10321	Hemizygous deletion	4	110716608	110737840	21233	Gain	2	11871443	11872571	1129	Duplication
1	263924931	263944017	19087	Hemizygous deletion	4	111765121	111777190	12070	Loss	2	119023279	119024751	1473	Duplication
1	1449868	1452350	2483	Duplication	4	112055561	112124431	68871	Loss	2	119229222	119268754	39533	Deletion
1	110269586	110290769	21184	Duplication	4	112955137	113038849	83713	Loss	2	120352330	120378897	26568	Deletion
1	110375419	110387808	12390	Duplication	4	114012607	114034489	21883	Loss	2	120352330	120408158	55829	Deletion
1	154083063	154085168	2106	Homozygous deletion	4	114304823	114306899	2077	Loss	2	120366135	120378897	12763	Deletion
1	553722	628019	74298	Hemizygous deletion	4	114593507	114614228	20722	Loss	2	120366135	120408158	42024	Deletion
1	955170	961697	6528	Hemizygous deletion	4	116196045	116205858	9814	Loss	2	120377680	120402461	24782	Deletion
1	21463082	21479990	16909	Hemizygous deletion	4	116253628	116298788	45161	Loss	2	120386743	120408158	21416	Deletion
1	86275425	86280837	5413	Hemizygous deletion	4	116631845	116689904	58060	Loss	2	120402461	120406717	4257	Deletion
1	261133642	261141262	7621	Hemizygous deletion	4	117303590	117308049	4460	Loss	2	120402461	120408158	5698	Deletion
1	34487159	34503450	16292	Homozygous deletion	4	118009755	118016234	6480	Gain	2	120572298	120578766	6469	Deletion
1	117042642	117048230	5589	Homozygous deletion	4	118047093	118149156	102064	Loss	2	120572298	120591471	19174	Deletion
1	626498	642757	16260	Hemizygous deletion	4	118214478	118262690	48213	Loss	2	120572298	120696865	124568	Deletion
1	261359133	261364015	4883	Hemizygous deletion	4	118431542	118477047	45506	Loss	2	120635928	120727794	91867	Deletion
1	110253647	110380268	126622	Duplication	4	118543819	118627017	83199	Loss	2	120650068	120687728	37661	Deletion
1	117042642	117048230	5589	Homozygous deletion	4	118903997	118934519	30523	Loss	2	120663836	120675804	11969	Deletion
1	154083063	154085168	2106	Hemizygous deletion	4	119058066	119060655	2590	Loss	2	120663836	120687728	23893	Deletion
1	110375419	110380268	4850	Duplication	5	1836563	1859690	23128	Mixed	2	120663836	120706352	42517	Deletion
1	152677374	152689433	12060	Duplication	5	2332061	2410487	78427	Mixed	2	120671878	120675804	3927	Deletion
1	276156	312707	36552	Hemizygous deletion	5	7627122	7645446	18325	Mixed	2	120674629	120675804	1176	Deletion
1	553722	563419	9698	Hemizygous deletion	5	8628964	8701584	72621	Mixed	2	120674629	120687728	13100	Deletion
1	1090493	1130113	39621	Hemizygous deletion	5	8903138	8974990	71853	Mixed	2	120791320	120804736	13417	Deletion
1	3112486	3125341	12856	Hemizygous deletion	5	9023061	9066330	43270	Mixed	2	120839542	120843047	3506	Deletion
1	13927068	13931338	4271	Hemizygous deletion	5	11690004	11803118	113115	Mixed	2	120842961	120873249	30289	Deletion
1	15708931	15724037	15107	Hemizygous deletion	5	11877466	12013463	135998	Mixed	2	121027005	121041191	14187	Deletion
1	15795644	15814529	18886	Hemizygous deletion	5	16620970	16759885	138916	Mixed	2	121252978	121255414	2437	Deletion
1	20355515	20369907	14393	Hemizygous deletion	5	17808119	17891515	83397	Mixed	2	121298574	121310089	11516	Deletion
1	165349010	165352845	3836	Hemizygous deletion	5	38883600	39026117	142518	Mixed	2	121388987	121432286	43300	Deletion
1	261359133	261378393	19261	Hemizygous deletion	5	39121763	39259983	138221	Mixed	2	121432246	121498801	66556	Deletion
1	263772088	263801059	28972	Hemizygous deletion	5	40489106	40536149	47044	Mixed	2	121824171	121938799	114629	Deletion
1	263924931	263944017	19087	Hemizygous deletion	5	49244722	49278522	33801	Mixed	2	121898186	122065849	167664	Deletion
1	34487159	34503450	16292	Homozygous deletion	5	49553739	49643653	89915	Mixed	2	121958598	121962657	4060	Duplication
1	125742723	125743987	1265	Homozygous deletion	5	49798338	49804384	6047	Mixed	2	122039880	122084154	44275	Deletion
1	160900434	160969089	68656	Homozygous deletion	5	54779199	54790950	11752	Mixed	2	122814813	123015055	200243	Deletion
1	127170144	127182285	12142	Hemizygous deletion	5	81962724	82240307	277584	Mixed	2	122866487	122960234	93748	Deletion
1	129130886	129137871	6986	Hemizygous deletion	5	82350899	82761560	410662	Mixed	2	122907109	122994713	87605	Deletion
1	189251213	189252820	1608	Hemizygous deletion	5	82861956	83024367	162412	Mixed	2	123011198	123060127	48930	Duplication
1	262100025	262103532	3508	Hemizygous deletion	5	83049409	83126985	77577	Mixed	2	123073808	123139766	65959	Deletion
1	86000468	86003962	3495	Duplication	5	88927056	88987218	60163	Mixed	2	123279828	123296092	16265	Deletion
1	274140079	274169446	29368	Homozygous deletion	5	89215023	89234306	19284	Mixed	2	123279828	123390310	110483	Deletion
1	553722	563419	9698	Hemizygous deletion	5	96323528	96416708	93181	Mixed	2	123279828	123399858	120031	Deletion
1	955170	961697	6528	Hemizygous deletion	5	101677901	101691668	13768	Mixed	2	123293499	123321817	28319	Deletion
1	2069474	2081593	12120	Hemizygous deletion	5	102649898	102803004	153107	Mixed	2	123341292	123390310	49019	Deletion
1	3417932	3419652	1721	Hemizygous deletion	5	48964	150099	101136	Gain	2	123710167	123738965	28799	Deletion
1	260279035	260287374	8340	Hemizygous deletion	5	274993	277796	2804	Loss	2	123724526	123738965	14440	Deletion
1	262098448	262103532	5085	Hemizygous deletion	5	465541	492142	26602	Gain	2	123724526	123809814	85289	Deletion
1	110238914	110290769	51856	Duplication	5	779001	817702	38702	Loss	2	123908778	123938094	29317	Deletion
1	110355371	110387808	32438	Duplication	5	2479531	2491960	12430	Loss	2	123908778	123994734	85957	Deletion
1	123073	149293	26221	Hemizygous deletion	5	2914557	2926758	12202	Loss	2	123975219	123994734	19516	Deletion
1	65627365	65645842	18478	Hemizygous deletion	5	3260726	3284977	24252	Gain	2	123975219	124012715	37497	Deletion
1	148718666	148754273	35608	Hemizygous deletion	5	3303375	3319761	16387	Gain	2	123975219	124048434	73216	Deletion
1	154083063	154085168	2106	Hemizygous deletion	5	3337263	3349729	12467	Gain	2	123975219	124096522	121304	Deletion
1	157263283	157335919	72637	Hemizygous deletion	5	3397215	3416845	19631	Loss	2	123989066	123994734	5669	Deletion
1	189251213	189252820	1608	Hemizygous deletion	5	3949444	3985441	35998	Loss	2	123989066	124093947	104882	Deletion
1	261522657	261531254	8598	Hemizygous deletion	5	4052617	4060199	7583	Loss	2	124219840	124247732	27893	Deletion
1	154605168	154609031	3864	Duplication	5	4400098	4456069	55972	Loss	2	124240307	124247732	7426	Deletion
1	117042642	117048230	5589	Homozygous deletion	5	4465458	4479370	13913	Loss	2	124378112	124404301	26190	Deletion
1	221098926	221129747	30822	Homozygous deletion	5	4754604	4761957	7354	Loss	2	124382925	124404301	21377	Deletion
1	276156	307655	31500	Hemizygous deletion	5	4847708	4851330	3623	Gain	2	124399910	124404301	4392	Deletion
1	553722	563419	9698	Hemizygous deletion	5	5377411	5379705	2295	Loss	2	124399910	124471740	71831	Deletion
1	955170	961697	6528	Hemizygous deletion	5	5482082	5580998	98917	Loss	2	124451064	124453657	2594	Deletion
1	3112486	3125341	12856	Hemizygous deletion	5	5874844	5891196	16353	Loss	2	124805566	124820312	14747	Deletion
1	263797082	263801059	3978	Hemizygous deletion	5	5981379	6000575	19197	Loss	2	125831269	125834548	3280	Duplication
1	154083063	154085168	2106	Homozygous deletion	5	6184974	6200658	15685	Loss	2	126080830	126127111	46282	Deletion
1	553722	563419	9698	Hemizygous deletion	5	6815466	6833919	18454	Loss	2	126080830	126134824	53995	Deletion
1	626498	642757	16260	Hemizygous deletion	5	6849480	6852800	3321	Gain	2	126080830	126143915	63086	Deletion
1	1642222	1646902	4681	Hemizygous deletion	5	8273382	8318727	45346	Gain	2	126080830	126153637	72808	Deletion
1	3112486	3125341	12856	Hemizygous deletion	5	8438065	8553470	115406	Loss	2	126127111	126143915	16805	Deletion
1	3417932	3419652	1721	Hemizygous deletion	5	8573953	8586016	12064	Gain	2	12653859	12656836	2978	Duplication
1	191334961	191341306	6346	Hemizygous deletion	5	9401831	9402847	1017	Gain	2	126705954	126713943	7990	Deletion
1	262239719	262256885	17167	Hemizygous deletion	5	9807842	9857756	49915	Loss	2	127994842	128002744	7903	Deletion
1	110253647	110391978	138332	Duplication	5	10017993	10046177	28185	Gain	2	12822948	12836010	13063	Duplication
1	117042642	117048230	5589	Homozygous deletion	5	10578271	10592152	13882	Loss	2	128418581	128431036	12456	Deletion
1	34578862	34588486	9625	Hemizygous deletion	5	10757411	10771312	13902	Loss	2	129126744	129130829	4086	Deletion
1	65580523	65604876	24354	Hemizygous deletion	5	10837231	10884946	47716	Loss	2	129314244	129327427	13184	Deletion
1	65794589	65810228	15640	Hemizygous deletion	5	11033568	11035694	2127	Loss	2	129606397	129648597	42201	Duplication
1	255868927	255870098	1172	Hemizygous deletion	5	11157759	11160577	2819	Gain	2	129611182	129640872	29691	Duplication
1	110244710	110380268	135559	Duplication	5	11542620	11575267	32648	Gain	2	129611182	129648597	37416	Duplication
1	274455329	274465484	10156	Duplication	5	12462011	12480928	18918	Loss	2	129620371	129640872	20502	Duplication
1	149345248	149349488	4241	Homozygous deletion	5	12523703	12533821	10119	Loss	2	129636899	129648597	11699	Duplication
1	553722	563419	9698	Hemizygous deletion	5	12746906	12759400	12495	Gain	2	129866142	129908945	42804	Deletion
1	869920	961697	91778	Hemizygous deletion	5	12991463	12993813	2351	Loss	2	130266736	130268211	1476	Deletion
1	17995659	18008770	13112	Hemizygous deletion	5	13379900	13386345	6446	Loss	2	130351945	130357891	5947	Duplication
1	189251213	189252820	1608	Hemizygous deletion	5	14070968	14081415	10448	Loss	2	130353098	130357306	4209	Duplication
1	260279035	260280899	1865	Hemizygous deletion	5	14260294	14308618	48325	Loss	2	130353098	130357891	4794	Duplication
1	110248531	110256941	8411	Duplication	5	14447661	14462434	14774	Loss	2	130446267	130460081	13815	Deletion
1	110346851	110387808	40958	Duplication	5	14476557	14498772	22216	Loss	2	130671451	130683051	11601	Deletion
1	153911304	153937653	26350	Duplication	5	15374970	15410405	35436	Gain	2	131999419	132005245	5827	Deletion
1	34487159	34503450	16292	Homozygous deletion	5	15554496	15569332	14837	Loss	2	131999419	132015773	16355	Deletion
1	117042642	117048230	5589	Homozygous deletion	5	15620099	15625251	5153	Gain	2	131999419	132016433	17015	Deletion
1	955170	961697	6528	Hemizygous deletion	5	15966427	15977617	11191	Gain	2	132407834	132412869	5036	Duplication
1	102806607	102811207	4601	Hemizygous deletion	5	16070158	16095975	25818	Loss	2	132407834	132415281	7448	Duplication
1	626498	642757	16260	Hemizygous deletion	5	16140534	16167864	27331	Loss	2	132794120	132799395	5276	Duplication
1	274140079	274169446	29368	Hemizygous deletion	5	16390213	16562588	172376	Loss	2	132892087	132905346	13260	Deletion
1	86000468	86003962	3495	Duplication	5	17212543	17229233	16691	Loss	2	133029486	133037071	7586	Deletion
1	110375419	110387808	12390	Duplication	5	17331658	17333917	2260	Loss	2	133029486	133053984	24499	Deletion
1	297075	312707	15633	Hemizygous deletion	5	17563997	17601546	37550	Loss	2	133622191	133623741	1551	Deletion
1	955170	961697	6528	Hemizygous deletion	5	17675158	17678779	3622	Loss	2	133906178	134008771	102594	Duplication
1	15807900	15814529	6630	Hemizygous deletion	5	17944399	17947656	3258	Loss	2	136925021	136933722	8702	Deletion
1	81700795	81711086	10292	Hemizygous deletion	5	18185476	18215039	29564	Loss	2	137003422	137013389	9968	Deletion
1	157263283	157335919	72637	Hemizygous deletion	5	18648500	18695952	47453	Loss	2	137504212	137524674	20463	Deletion
1	263772088	263801059	28972	Hemizygous deletion	5	18788543	18813629	25087	Loss	2	137518923	137532273	13351	Deletion
1	269362323	269371573	9251	Duplication	5	18868491	19008495	140005	Loss	2	138654475	138658320	3846	Deletion
1	34487159	34503450	16292	Homozygous deletion	5	19649084	19657390	8307	Loss	2	138658320	138664137	5818	Duplication
1	146553279	146579886	26608	Hemizygous deletion	5	20295565	20300526	4962	Gain	2	13936335	13944077	7743	Deletion
1	167407378	167539036	131659	Hemizygous deletion	5	20769582	20778584	9003	Loss	2	139969750	139982091	12342	Deletion
1	204720869	204747555	26687	Hemizygous deletion	5	20849173	20856434	7262	Loss	2	140783949	140787366	3418	Deletion
1	218938246	218964918	26673	Hemizygous deletion	5	21392344	21413643	21300	Gain	2	140783949	140826043	42095	Deletion
1	27068373	27103785	35413	Duplication	5	21425034	21434333	9300	Loss	2	140783949	140828879	44931	Deletion
1	117042642	117048230	5589	Homozygous deletion	5	21822673	21832817	10145	Loss	2	141329889	141353101	23213	Deletion
1	68636064	68666651	30588	Duplication	5	22217915	22230914	13000	Loss	2	141334759	141356902	22144	Deletion
1	104260926	104305868	44943	Duplication	5	22886807	22922270	35464	Loss	2	141335196	141428763	93568	Deletion
1	110269586	110282554	12969	Duplication	5	22990770	22994974	4205	Loss	2	141350448	141428763	78316	Deletion
1	110357732	110379058	21327	Duplication	5	23463872	23469273	5402	Loss	2	141594638	141600809	6172	Deletion
1	225703623	225708934	5312	Duplication	5	24975604	25105820	130217	Loss	2	141742780	141838638	95859	Deletion
1	117042642	117048230	5589	Homozygous deletion	5	25342943	25355863	12921	Loss	2	142341088	142343736	2649	Deletion
1	145580804	146829966	1249163	Hemizygous deletion	5	25667862	25697882	30021	Loss	2	142503993	142518703	14711	Deletion
1	218956964	218964918	7955	Hemizygous deletion	5	25941956	25958175	16220	Loss	2	143072551	143077949	5399	Deletion
1	104260926	104328289	67364	Duplication	5	26462477	26463815	1339	Gain	2	143236824	143252878	16055	Duplication
1	110269586	110295948	26363	Duplication	5	27439367	27478337	38971	Loss	2	143246890	143252878	5989	Duplication
1	234204643	234217738	13096	Duplication	5	28702661	28762532	59872	Loss	2	143758737	143763643	4907	Duplication
1	34487159	34503450	16292	Homozygous deletion	5	29634197	29649329	15133	Loss	2	144208436	144281755	73320	Deletion
1	117042642	117048230	5589	Homozygous deletion	5	29740068	29755938	15871	Loss	2	144257772	144295667	37896	Deletion
1	51792626	51805794	13169	Hemizygous deletion	5	29797345	29844095	46751	Loss	2	144276357	144295667	19311	Deletion
1	146553279	146579886	26608	Hemizygous deletion	5	30009001	30056748	47748	Loss	2	144849255	144866529	17275	Deletion
1	27068373	27074805	6433	Duplication	5	30108101	30181334	73234	Loss	2	144852256	144865228	12973	Deletion
1	68636064	68666651	30588	Duplication	5	30275720	30349895	74176	Loss	2	144948977	144984338	35362	Deletion
1	218956964	218964918	7955	Hemizygous deletion	5	30393021	30513037	120017	Loss	2	145729079	145733986	4908	Deletion
1	34487159	34503450	16292	Homozygous deletion	5	31006018	31131124	125107	Loss	2	146070214	146102313	32100	Deletion
1	218938246	218964918	26673	Homozygous deletion	5	31364563	31374068	9506	Loss	2	146352885	146376266	23382	Deletion
1	62229835	62231143	1309	Hemizygous deletion	5	32090481	32209342	118862	Loss	2	146352885	146402646	49762	Duplication
1	152910935	152934670	23736	Hemizygous deletion	5	32695369	32705012	9644	Loss	2	146938785	146992603	53819	Deletion
1	239185878	239256562	70685	Hemizygous deletion	5	33340408	33374003	33596	Loss	2	146952051	146978920	26870	Deletion
1	104260926	104330892	69967	Duplication	5	34252203	34264775	12573	Loss	2	146952051	147012531	60481	Deletion
1	34487159	34503450	16292	Homozygous deletion	5	35438906	35442142	3237	Loss	2	149099034	149104170	5137	Deletion
1	146553279	146579886	26608	Hemizygous deletion	5	35507858	35511576	3719	Loss	2	149099034	149118993	19960	Deletion
1	239185878	239256562	70685	Hemizygous deletion	5	35719657	35766893	47237	Loss	2	149201363	149364598	163236	Duplication
1	104260926	104333787	72862	Duplication	5	36648894	36649956	1063	Gain	2	150226340	150229506	3167	Deletion
1	34620210	34666982	46773	Hemizygous deletion	5	37194206	37199947	5742	Gain	2	150283239	150436588	153350	Deletion
1	40085503	40098814	13312	Hemizygous deletion	5	37887869	37965274	77406	Gain	2	150303412	150304579	1168	Deletion
1	150512915	150536898	23984	Hemizygous deletion	5	38395650	38403063	7414	Loss	2	150303412	150311364	7953	Deletion
1	152966721	152985569	18849	Hemizygous deletion	5	38457314	38601960	144647	Loss	2	150303412	150312930	9519	Deletion
1	193554101	193569506	15406	Hemizygous deletion	5	38623787	38637767	13981	Gain	2	150970862	150980852	9991	Deletion
1	239185878	239256562	70685	Hemizygous deletion	5	38662344	38691155	28812	Loss	2	152353027	152393517	40491	Deletion
1	54573038	54581219	8182	Duplication	5	38713044	38741418	28375	Loss	2	152632772	152642401	9630	Deletion
1	34487159	34503450	16292	Homozygous deletion	5	39480698	39491370	10673	Gain	2	152704346	152750120	45775	Deletion
1	117042642	117048230	5589	Homozygous deletion	5	39516237	39525597	9361	Loss	2	152709511	152758903	49393	Deletion
1	24172178	24234161	61984	Hemizygous deletion	5	39649424	39650552	1129	Loss	2	152865267	152881607	16341	Deletion
1	239185878	239256562	70685	Hemizygous deletion	5	39672256	39693641	21386	Loss	2	153048702	153051579	2878	Duplication
1	24172178	24234161	61984	Hemizygous deletion	5	40591682	40609264	17583	Loss	2	153158997	153174329	15333	Duplication
1	79454483	79458715	4233	Hemizygous deletion	5	40808806	40869347	60542	Loss	2	153251198	153460323	209126	Deletion
1	149939565	149946562	6998	Hemizygous deletion	5	40923450	41044494	121045	Loss	2	153286232	153337581	51350	Deletion
1	158591960	158595857	3898	Hemizygous deletion	5	41167937	41203781	35845	Loss	2	153401984	153403056	1073	Deletion
1	34605245	34666982	61738	Hemizygous deletion	5	41261569	41315913	54345	Loss	2	1534115	1583088	48974	Deletion
1	130731839	130741948	10110	Hemizygous deletion	5	41666418	41672354	5937	Gain	2	15359390	15366408	7019	Duplication
1	146553279	146579886	26608	Hemizygous deletion	5	41737710	41745209	7500	Loss	2	15359390	15375567	16178	Duplication
1	239185878	239256562	70685	Hemizygous deletion	5	43453216	43460341	7126	Loss	2	15359390	15386220	26831	Duplication
1	166578710	166586700	7991	Duplication	5	43520447	43589412	68966	Loss	2	154071095	154150308	79214	Duplication
1	34487159	34503450	16292	Homozygous deletion	5	47067312	47089558	22247	Gain	2	154398660	154418637	19978	Deletion
1	117042642	117059022	16381	Homozygous deletion	5	47920475	47934476	14002	Loss	2	154398660	154435733	37074	Duplication
1	40085503	40092466	6964	Hemizygous deletion	5	47983120	47985297	2178	Loss	2	154585552	154595215	9664	Duplication
1	172458461	172468191	9731	Hemizygous deletion	5	48174000	48183820	9821	Loss	2	154591485	154595215	3731	Duplication
1	27068373	27103785	35413	Duplication	5	48780994	48795295	14302	Loss	2	154721399	154750707	29309	Deletion
1	104260926	104330892	69967	Duplication	5	49545198	49549505	4308	Gain	2	155681434	155686345	4912	Deletion
1	110244710	110293854	49145	Duplication	5	49781003	49785329	4327	Loss	2	156192872	156277234	84363	Duplication
1	110347990	110380268	32279	Duplication	5	49792267	49794865	2599	Loss	2	156222663	156277234	54572	Duplication
1	156669953	156671475	1523	Duplication	5	51216949	51236254	19306	Gain	2	156728237	156736706	8470	Deletion
1	152969982	152985569	15588	Hemizygous deletion	5	52411908	52445945	34038	Loss	2	156994111	157004160	10050	Deletion
1	239185878	239256562	70685	Hemizygous deletion	5	52493438	52494942	1505	Loss	2	158437187	158455449	18263	Deletion
1	104260926	104305868	44943	Duplication	5	53219250	53230833	11584	Gain	2	159116370	159118970	2601	Deletion
1	110375419	110387808	12390	Duplication	5	53247470	53250889	3420	Gain	2	159454910	159466686	11777	Deletion
1	34487159	34503450	16292	Homozygous deletion	5	53891387	53893109	1723	Loss	2	160111429	160167114	55686	Deletion
1	150512915	150536898	23984	Hemizygous deletion	5	55837262	55842566	5305	Loss	2	160190477	160230626	40150	Deletion
1	172458461	172468191	9731	Hemizygous deletion	5	58264982	58274139	9158	Loss	2	160213427	160230626	17200	Deletion
1	7125905	7135470	9566	Duplication	5	59010469	59017863	7395	Loss	2	160395558	160490666	95109	Deletion
1	27043519	27103785	60267	Duplication	5	61041174	61046440	5267	Loss	2	160475352	160490666	15315	Deletion
1	104260926	104333787	72862	Duplication	5	61056139	61067909	11771	Loss	2	160487896	160521167	33272	Deletion
1	34487159	34503450	16292	Homozygous deletion	5	61137253	61165274	28022	Loss	2	161141154	161169575	28422	Deletion
1	150512915	150544234	31320	Hemizygous deletion	5	62953769	62955872	2104	Gain	2	161825480	161828416	2937	Duplication
1	239185878	239256562	70685	Hemizygous deletion	5	63089213	63095921	6709	Loss	2	161825480	161847550	22071	Duplication
1	34487159	34503450	16292	Homozygous deletion	5	63987504	64010207	22704	Gain	2	161825480	161857089	31610	Duplication
1	150512915	150544234	31320	Hemizygous deletion	5	64323351	64330547	7197	Loss	2	162055070	162057358	2289	Deletion
1	34487159	34503450	16292	Homozygous deletion	5	64495459	64579630	84172	Loss	2	162056377	162114788	58412	Deletion
1	221098926	221129747	30822	Homozygous deletion	5	64891970	64954620	62651	Loss	2	162928094	162932242	4149	Duplication
1	48725365	48737145	11781	Hemizygous deletion	5	65158109	65163908	5800	Loss	2	162937267	163008838	71572	Deletion
1	146553279	146579886	26608	Hemizygous deletion	5	65627042	65649126	22085	Gain	2	162962090	163008838	46749	Deletion
1	34487159	34503450	16292	Homozygous deletion	5	65788209	65796373	8165	Gain	2	163679046	163721623	42578	Deletion
1	117042642	117048230	5589	Homozygous deletion	5	66025674	66031568	5895	Loss	2	165363147	165377284	14138	Deletion
1	154083063	154085168	2106	Homozygous deletion	5	66679288	66683007	3720	Loss	2	165728091	165748811	20721	Deletion
1	239185878	239256562	70685	Homozygous deletion	5	66782842	66803271	20430	Loss	2	165808024	165845514	37491	Deletion
1	117042642	117059022	16381	Duplication	5	70083495	70106259	22765	Loss	2	165823726	165845514	21789	Deletion
1	149345248	149349488	4241	Homozygous deletion	5	70989575	70992764	3190	Loss	2	166165611	166181639	16029	Duplication
1	146553279	146579886	26608	Hemizygous deletion	5	71225461	71284181	58721	Loss	2	166165611	166199435	33825	Duplication
1	221098926	221119775	20850	Hemizygous deletion	5	71339606	71355196	15591	Loss	2	166165611	166217009	51399	Deletion
1	239185878	239256562	70685	Hemizygous deletion	5	71393635	71405314	11680	Loss	2	166165611	166243366	77756	Deletion
1	239185878	239256562	70685	Homozygous deletion	5	71474445	71530130	55686	Loss	2	166195921	166217009	21089	Deletion
1	149345248	149349488	4241	Hemizygous deletion	5	71862673	71870158	7486	Loss	2	166261975	166280497	18523	Deletion
1	171974379	171980780	6402	Hemizygous deletion	5	73459720	73598409	138690	Loss	2	166321173	166322565	1393	Duplication
1	1449868	1452350	2483	Duplication	5	73769443	73839501	70059	Loss	2	166397359	166456854	59496	Deletion
1	149345248	149349488	4241	Homozygous deletion	5	74192704	74235638	42935	Loss	2	166643474	166707806	64333	Deletion
1	117042642	117048230	5589	Homozygous deletion	5	74473752	74482281	8530	Loss	2	166665974	166714207	48234	Deletion
1	221098926	221129747	30822	Homozygous deletion	5	74501573	74560136	58564	Gain	2	166952674	167127852	175179	Deletion
1	150512915	150544234	31320	Hemizygous deletion	5	75161379	75196824	35446	Loss	2	166971488	167100172	128685	Deletion
1	110253647	110284391	30745	Duplication	5	76515161	76521828	6668	Gain	2	167024939	167059319	34381	Deletion
1	34487159	34503450	16292	Homozygous deletion	5	78657242	78759247	102006	Loss	2	167219792	167343661	123870	Deletion
1	150512915	150544234	31320	Hemizygous deletion	5	80281523	80294167	12645	Loss	2	167451159	167462154	10996	Deletion
1	239185878	239256562	70685	Hemizygous deletion	5	80969068	80988733	19666	Loss	2	167564604	167600135	35532	Deletion
1	117042642	117048230	5589	Homozygous deletion	5	81474363	81508253	33891	Loss	2	167804020	167848258	44239	Deletion
1	221098926	221129747	30822	Homozygous deletion	5	81868841	81885191	16351	Loss	2	167804020	167893410	89391	Deletion
1	150512915	150544234	31320	Hemizygous deletion	5	83257176	83274910	17735	Loss	2	167836430	167848258	11829	Deletion
1	37036353	37052441	16089	Duplication	5	83418318	83507423	89106	Loss	2	167836430	167854034	17605	Deletion
1	154083063	154085168	2106	Homozygous deletion	5	85666171	85680185	14015	Loss	2	167848258	167854034	5777	Deletion
1	110375419	110387808	12390	Duplication	5	86844792	86848001	3210	Loss	2	167938559	168007213	68655	Deletion
1	34487159	34497997	10839	Homozygous deletion	5	87128329	87193717	65389	Loss	2	168150889	168153443	2555	Deletion
1	117042642	117048230	5589	Homozygous deletion	5	87212425	87223304	10880	Loss	2	168301669	168360834	59166	Deletion
1	149345248	149349488	4241	Homozygous deletion	5	88671769	88676293	4525	Loss	2	168314493	168327611	13119	Deletion
1	146553279	146579886	26608	Hemizygous deletion	5	88888387	88898208	9822	Loss	2	168314493	168439570	125078	Deletion
1	239185878	239256562	70685	Hemizygous deletion	5	89296513	89299843	3331	Gain	2	168549976	168584542	34567	Deletion
1	110248531	110295948	47418	Duplication	5	89557275	89633178	75904	Loss	2	168562012	168617473	55462	Deletion
1	34487159	34503450	16292	Homozygous deletion	5	89698699	89735236	36538	Loss	2	168562012	168656076	94065	Deletion
1	154083063	154085168	2106	Homozygous deletion	5	89799787	89808846	9060	Gain	2	168655791	168661088	5298	Deletion
1	130731839	130741948	10110	Hemizygous deletion	5	90080819	90111702	30884	Loss	2	168751119	168757302	6184	Deletion
1	239185878	239256562	70685	Hemizygous deletion	5	90570511	90601566	31056	Loss	2	169113904	169163807	49904	Duplication
1	34487159	34503450	16292	Homozygous deletion	5	91691955	91693893	1939	Loss	2	169896296	169916851	20556	Deletion
1	239185878	239256562	70685	Homozygous deletion	5	91861231	91904883	43653	Loss	2	170087878	170089950	2073	Deletion
1	110248531	110282554	34024	Duplication	5	92282184	92289794	7611	Loss	2	1701982	1746117	44136	Deletion
1	154083063	154085168	2106	Homozygous deletion	5	93856723	93859558	2836	Gain	2	1701982	1748707	46726	Deletion
1	20250231	20261701	11471	Hemizygous deletion	5	93904272	93996436	92165	Loss	2	170376681	170419992	43312	Deletion
1	24202686	24234161	31476	Hemizygous deletion	5	94322724	94381698	58975	Loss	2	170376681	170424322	47642	Deletion
1	26674107	26695660	21554	Hemizygous deletion	5	95292782	95337815	45034	Loss	2	170396644	170415591	18948	Deletion
1	34487159	34503450	16292	Hemizygous deletion	5	95825055	95839119	14065	Gain	2	1705268	1716708	11441	Deletion
1	37692427	37698726	6300	Hemizygous deletion	5	96112684	96129942	17259	Gain	2	1705268	1746117	40850	Deletion
1	55966253	55987114	20862	Hemizygous deletion	5	96950970	96967555	16586	Loss	2	1711299	1746117	34819	Deletion
1	56349126	56407756	58631	Hemizygous deletion	5	97391289	97530761	139473	Loss	2	1711299	1761928	50630	Deletion
1	58840757	58854297	13541	Hemizygous deletion	5	97628234	97633560	5327	Loss	2	1713544	1748707	35164	Deletion
1	67795380	67803093	7714	Hemizygous deletion	5	97759774	97825662	65889	Loss	2	171611750	171639057	27308	Deletion
1	80696526	80699462	2937	Hemizygous deletion	5	98242123	98272463	30341	Loss	2	1716618	1746117	29500	Deletion
1	81071576	81152619	81044	Hemizygous deletion	5	98406610	98422242	15633	Loss	2	172471907	172479671	7765	Deletion
1	81524895	81567979	43085	Hemizygous deletion	5	99977424	99981337	3914	Loss	2	172486163	172508069	21907	Deletion
1	116637047	116655000	17954	Hemizygous deletion	5	100370370	100789389	419020	Loss	2	173804166	173830185	26020	Deletion
1	125742723	125743987	1265	Hemizygous deletion	5	100887347	100971945	84599	Loss	2	173961657	173976405	14749	Deletion
1	129130886	129155349	24464	Hemizygous deletion	5	101557604	101580215	22612	Loss	2	174314448	174388031	73584	Deletion
1	130727311	130741948	14638	Hemizygous deletion	5	101765871	101816123	50253	Loss	2	174851948	174865631	13684	Deletion
1	132842227	132885302	43076	Hemizygous deletion	5	101991606	102024432	32827	Loss	2	178453401	178476225	22825	Deletion
1	134906836	134945609	38774	Hemizygous deletion	5	102372541	102430330	57790	Loss	2	178592256	178593997	1742	Deletion
1	135963567	135986742	23176	Hemizygous deletion	5	102546388	102636636	90249	Loss	2	179051694	179081564	29871	Duplication
1	150512915	150544234	31320	Hemizygous deletion	5	104739254	104741004	1751	Loss	2	179563576	179661414	97839	Deletion
1	158657484	158699547	42064	Hemizygous deletion	5	105307921	105313290	5370	Loss	2	179827074	179892029	64956	Deletion
1	166576994	166611334	34341	Hemizygous deletion	5	106596584	106616135	19552	Loss	2	180486286	180575151	88866	Deletion
1	207024064	207049927	25864	Hemizygous deletion	5	106924688	107033925	109238	Gain	2	180542249	180561865	19617	Duplication
1	218938246	218964918	26673	Hemizygous deletion	6	2848296	2876738	28443	Mixed	2	180550025	180575151	25127	Deletion
1	240963515	241039433	75919	Hemizygous deletion	6	3204962	3412650	207689	Mixed	2	180561865	180575151	13287	Duplication
1	57774205	57793716	19512	Hemizygous deletion	6	10253045	10428914	175870	Mixed	2	180859941	180864650	4710	Deletion
1	167361883	167402591	40709	Hemizygous deletion	6	21728872	21797469	68598	Mixed	2	180952463	180968840	16378	Duplication
1	65569509	65611332	41824	Hemizygous deletion	6	25346651	25382742	36092	Mixed	2	181209329	181308981	99653	Duplication
1	65794589	65810228	15640	Hemizygous deletion	6	30163098	30189688	26591	Mixed	2	181295175	181328845	33671	Duplication
1	173407605	173536722	129118	Hemizygous deletion	6	31751958	32311262	559305	Mixed	2	181425802	181446791	20990	Deletion
1	117042642	117048230	5589	Homozygous deletion	6	33345059	33647667	302609	Mixed	2	181536157	181561257	25101	Deletion
1	82296831	82333646	36816	Duplication	6	34127992	34194944	66953	Mixed	2	182361204	182378608	17405	Duplication
1	239850355	239857576	7222	Duplication	6	48690299	48727689	37391	Mixed	2	182382269	182432523	50255	Duplication
1	110248531	110295948	47418	Duplication	6	50827262	50949921	122660	Mixed	2	183472925	183484281	11357	Deletion
1	110375419	110387808	12390	Duplication	6	64017612	64122205	104594	Mixed	2	18393484	18437619	44136	Deletion
1	110238914	110295948	57035	Duplication	6	73938833	74269743	330911	Mixed	2	1842260	1859123	16864	Deletion
1	110375419	110387808	12390	Duplication	6	78318499	79954805	1636307	Mixed	2	184574334	184590318	15985	Deletion
1	117042642	117048230	5589	Homozygous deletion	6	84351995	84359462	7468	Mixed	2	184627868	184643607	15740	Deletion
1	239850355	239857576	7222	Duplication	6	100368424	100456331	87908	Mixed	2	184816234	184819493	3260	Deletion
1	29917699	29942555	24857	Hemizygous deletion	6	110336622	110392610	55989	Mixed	2	185378011	185392126	14116	Duplication
1	165349010	165352150	3141	Duplication	6	111618738	111632035	13298	Mixed	2	185499833	185524470	24638	Deletion
1	117042642	117048230	5589	Homozygous deletion	6	113579312	113926543	347232	Mixed	2	185499833	185531353	31521	Deletion
1	218956964	218964918	7955	Hemizygous deletion	6	115953862	116056473	102612	Mixed	2	186291525	186334530	43006	Deletion
1	110347990	110387808	39819	Duplication	6	179036	322657	143622	Gain	2	186320435	186334530	14096	Deletion
1	259446862	259461363	14502	Hemizygous deletion	6	889216	890548	1333	Loss	2	186532881	186581394	48514	Deletion
1	57774205	57793716	19512	Hemizygous deletion	6	919772	1052544	132773	Loss	2	1869287	1910326	41040	Duplication
1	91120086	91132787	12702	Hemizygous deletion	6	1188607	1191548	2942	Loss	2	187624249	187633057	8809	Duplication
1	13435289	13443232	7944	Duplication	6	1249576	1267122	17547	Gain	2	187676189	187770185	93997	Deletion
1	274140079	274169446	29368	Homozygous deletion	6	1438196	1517352	79157	Loss	2	188196234	188211254	15021	Deletion
1	52222844	52291767	68924	Hemizygous deletion	6	1698298	1728899	30602	Loss	2	188196234	188219876	23643	Deletion
1	239191196	239212139	20944	Duplication	6	2636840	2646794	9955	Loss	2	188205367	188219876	14510	Deletion
1	269293226	269309413	16188	Duplication	6	2965029	2990743	25715	Loss	2	188205367	188232622	27256	Deletion
1	208143967	208160018	16052	Duplication	6	3473830	3538438	64609	Loss	2	188295443	188305893	10451	Deletion
1	160618434	160622668	4235	Hemizygous deletion	6	3940773	3952149	11377	Loss	2	189676518	189679033	2516	Deletion
1	274148429	274169446	21018	Hemizygous deletion	6	4601375	5439243	837869	Loss	2	189676518	189695425	18908	Deletion
1	65794589	65822552	27964	Hemizygous deletion	6	5496659	5500264	3606	Gain	2	189801434	189817826	16393	Deletion
1	110341316	110348050	6735	Duplication	6	6186272	6187328	1057	Gain	2	189801434	189821891	20458	Deletion
1	110269586	110282554	12969	Duplication	6	7523216	7614366	91151	Loss	2	189821752	190074371	252620	Deletion
1	110337752	110380268	42517	Duplication	6	7633746	7692867	59122	Loss	2	1900062	1957905	57844	Deletion
1	125742723	125743987	1265	Duplication	6	7963881	8107660	143780	Loss	2	190194575	190198479	3905	Deletion
1	239185878	239256562	70685	Hemizygous deletion	6	8216781	8372037	155257	Loss	2	190633230	190937610	304381	Deletion
1	166578710	166586700	7991	Duplication	6	8679716	8751668	71953	Loss	2	190640282	190937610	297329	Deletion
1	208966678	208997210	30533	Hemizygous deletion	6	8793615	8807396	13782	Loss	2	190809053	190817484	8432	Deletion
1	274148429	274169446	21018	Hemizygous deletion	6	8877453	9156366	278914	Loss	2	190814802	190817484	2683	Deletion
1	105741762	105744410	2649	Duplication	6	9451883	9694129	242247	Loss	2	190906002	190922941	16940	Deletion
1	110248531	110273323	24793	Duplication	6	9749812	9760062	10251	Loss	2	19092643	19146502	53860	Deletion
1	110375419	110387808	12390	Duplication	6	9871964	10055901	183938	Loss	2	191000005	191038662	38658	Duplication
1	204720869	204747555	26687	Homozygous deletion	6	10600245	10603933	3689	Loss	2	191000005	191063655	63651	Duplication
1	57774205	57793716	19512	Hemizygous deletion	6	10920826	10943250	22425	Loss	2	191011240	191059752	48513	Duplication
1	167361883	167402591	40709	Hemizygous deletion	6	12027041	12032508	5468	Loss	2	191046841	191056885	10045	Duplication
1	123844631	123863613	18983	Hemizygous deletion	6	12105138	12114825	9688	Loss	2	19121334	19128640	7307	Deletion
1	1449868	1452350	2483	Duplication	6	12491747	12511438	19692	Loss	2	19121334	19192662	71329	Deletion
1	97618347	97641141	22795	Duplication	6	14563848	14574500	10653	Loss	2	191882512	191895579	13068	Deletion
1	110357732	110379058	21327	Duplication	6	15147047	15167199	20153	Loss	2	191888844	191895579	6736	Deletion
1	130443798	130464349	20552	Hemizygous deletion	6	15178749	15196829	18081	Gain	2	191914159	191915841	1683	Duplication
1	150512915	150544234	31320	Hemizygous deletion	6	16288242	16302935	14694	Gain	2	191986851	191998582	11732	Deletion
1	15957108	15975205	18098	Duplication	6	16578507	16583802	5296	Gain	2	192213056	192215123	2068	Deletion
1	110269586	110282554	12969	Duplication	6	17217031	17316361	99331	Loss	2	19244859	19287034	42176	Deletion
1	24172178	24234161	61984	Hemizygous deletion	6	18053801	18067256	13456	Loss	2	192984634	193002806	18173	Deletion
1	80804229	80808559	4331	Hemizygous deletion	6	18407837	18436588	28752	Loss	2	192986387	193002806	16420	Deletion
1	98310442	98311564	1123	Duplication	6	18634232	18691022	56791	Loss	2	192990425	193002806	12382	Deletion
1	65580523	65611332	30810	Hemizygous deletion	6	18919207	18954148	34942	Gain	2	193679810	193708469	28660	Deletion
1	65794589	65810228	15640	Hemizygous deletion	6	19040499	19115489	74991	Loss	2	193867156	193879016	11861	Deletion
1	78999650	79029818	30169	Hemizygous deletion	6	20111062	20122625	11564	Loss	2	193924415	193932326	7912	Deletion
1	239185878	239256562	70685	Hemizygous deletion	6	21193637	21199106	5470	Loss	2	194060612	194080838	20227	Deletion
1	110347990	110387808	39819	Duplication	6	21388380	21404853	16474	Loss	2	194298391	194476709	178319	Deletion
1	1086441	1090493	4053	Homozygous deletion	6	21583183	21592833	9651	Loss	2	194307665	194377330	69666	Deletion
1	117042642	117048230	5589	Homozygous deletion	6	22591589	22610439	18851	Loss	2	194339489	194364655	25167	Deletion
1	65580523	65627908	47386	Hemizygous deletion	6	23226454	23231307	4854	Loss	2	19435310	19761746	326437	Deletion
1	138755707	138761495	5789	Hemizygous deletion	6	25174608	25197616	23009	Gain	2	194364655	194734698	370044	Deletion
1	180834387	180851265	16879	Hemizygous deletion	6	26022301	26083410	61110	Loss	2	194377057	194482789	105733	Deletion
1	239185878	239256562	70685	Hemizygous deletion	6	26275276	26306124	30849	Loss	2	194392915	194431566	38652	Deletion
1	79949118	79966649	17532	Duplication	6	26327707	26360956	33250	Loss	2	194392915	194771600	378686	Deletion
1	150526498	150544234	17737	Hemizygous deletion	6	26389658	26500459	110802	Loss	2	194413913	194431566	17654	Duplication
1	239185878	239256562	70685	Hemizygous deletion	6	26577306	26600643	23338	Loss	2	194426413	194482789	56377	Deletion
1	105983228	106067828	84601	Duplication	6	26620544	26635575	15032	Loss	2	194608786	194628925	20140	Deletion
1	125742723	125743987	1265	Duplication	6	27837215	27852440	15226	Loss	2	194608786	194974625	365840	Deletion
1	105741762	105744410	2649	Duplication	6	28004541	28063371	58831	Loss	2	194717807	194771600	53794	Deletion
1	110248531	110256941	8411	Duplication	6	28726854	28727987	1134	Loss	2	194902686	194912505	9820	Deletion
1	110375419	110387808	12390	Duplication	6	28772457	28805809	33353	Loss	2	194928837	194947454	18618	Deletion
1	259558489	259575290	16802	Duplication	6	30741613	30747836	6224	Loss	2	194928837	194968226	39390	Deletion
1	239185878	239256562	70685	Homozygous deletion	6	30934302	31019656	85355	Loss	2	194928837	194974625	45789	Deletion
1	146553279	146579886	26608	Hemizygous deletion	6	31127970	31137776	9807	Loss	2	194933580	194974625	41046	Deletion
1	153615898	153630638	14741	Hemizygous deletion	6	31260462	31282260	21799	Loss	2	194933580	194995014	61435	Deletion
1	208966678	208995219	28542	Hemizygous deletion	6	31349563	31350876	1314	Gain	2	194947454	194974625	27172	Deletion
1	274140079	274169446	29368	Hemizygous deletion	6	32489567	32501110	11544	Loss	2	195080867	195103590	22724	Deletion
1	262423448	262426951	3504	Duplication	6	32538652	32566600	27949	Loss	2	195683756	195697829	14074	Deletion
1	269342004	269356407	14404	Duplication	6	32599772	32652575	52804	Loss	2	195683756	195748444	64689	Deletion
1	154083063	154085168	2106	Homozygous deletion	6	32726590	32806596	80007	Loss	2	195946074	195964034	17961	Deletion
1	82702258	82724361	22104	Hemizygous deletion	6	32898707	33012304	113598	Loss	2	195964034	196098589	134556	Deletion
1	65627365	65635491	8127	Duplication	6	33276595	33287679	11085	Loss	2	195993378	196042232	48855	Deletion
1	269294950	269342004	47055	Duplication	6	33815846	34105112	289267	Loss	2	195993378	196224674	231297	Deletion
1	117042642	117048230	5589	Homozygous deletion	6	34262278	34290040	27763	Loss	2	196147192	196224674	77483	Deletion
1	167361883	167399922	38040	Hemizygous deletion	6	34640206	34684945	44740	Loss	2	196163924	196224674	60751	Deletion
1	110255860	110284391	28532	Duplication	6	36216032	36228141	12110	Gain	2	196163924	196234126	70203	Deletion
1	218648139	218742755	94617	Duplication	6	36831746	36842683	10938	Loss	2	196286836	196307631	20796	Deletion
1	150512915	150536898	23984	Hemizygous deletion	6	36940375	36947919	7545	Gain	2	196349558	196576095	226538	Deletion
1	110269586	110282554	12969	Duplication	6	38363231	38389309	26079	Loss	2	196440042	196460182	20141	Deletion
1	110355371	110379058	23688	Duplication	6	38819147	38883690	64544	Loss	2	196705710	196747155	41446	Deletion
1	139804455	139810295	5841	Duplication	6	39322826	39327084	4259	Gain	2	19698288	19733321	35034	Deletion
1	218648139	218747682	99544	Duplication	6	40174862	40190270	15409	Gain	2	19698288	19836825	138538	Deletion
1	117042642	117048230	5589	Homozygous deletion	6	40457295	40533486	76192	Loss	2	19710164	19733321	23158	Deletion
1	136153392	136193081	39690	Hemizygous deletion	6	40654578	41598767	944190	Gain	2	19710164	19761746	51583	Deletion
1	150512915	150536898	23984	Homozygous deletion	6	41744584	41746696	2113	Gain	2	19710164	19836825	126662	Deletion
1	167361883	167402591	40709	Hemizygous deletion	6	42470384	42672464	202081	Loss	2	197385000	197895553	510554	Duplication
1	110269586	110282554	12969	Duplication	6	42787757	42923999	136243	Loss	2	19742887	19779336	36450	Deletion
1	110357732	110379058	21327	Duplication	6	44104761	44119441	14681	Loss	2	198085585	199556459	1470875	Duplication
1	218648139	218742755	94617	Duplication	6	44611760	44624685	12926	Loss	2	198120850	198143545	22696	Deletion
1	1086441	1090493	4053	Homozygous deletion	6	44633463	44638791	5329	Gain	2	198196690	198206143	9454	Duplication
1	117042642	117048230	5589	Homozygous deletion	6	46339437	46351895	12459	Loss	2	19823162	19852745	29584	Deletion
1	233702566	233729262	26697	Hemizygous deletion	6	46899587	46910314	10728	Gain	2	198557630	198567600	9971	Deletion
1	79949118	79966649	17532	Duplication	6	47253935	47276744	22810	Loss	2	198911485	198977808	66324	Deletion
1	130731839	130741948	10110	Homozygous deletion	6	47378891	47445915	67025	Loss	2	198916610	198972658	56049	Deletion
1	218956964	218964918	7955	Hemizygous deletion	6	47673418	47680798	7381	Loss	2	198916610	199005535	88926	Deletion
1	65569509	65611332	41824	Hemizygous deletion	6	47706934	47733877	26944	Loss	2	198938689	198972658	33970	Deletion
1	136153392	136195589	42198	Hemizygous deletion	6	47751022	47760681	9660	Loss	2	198956266	198977808	21543	Deletion
1	37401835	37405688	3854	Duplication	6	48302262	48315983	13722	Loss	2	19920113	19930606	10494	Deletion
1	223862130	223923882	61753	Duplication	6	48365968	48383145	17178	Loss	2	19928211	19930606	2396	Deletion
1	1741492	1754908	13417	Hemizygous deletion	6	48533741	48546444	12704	Loss	2	199702169	200429694	727526	Duplication
1	208143967	208160018	16052	Duplication	6	48584795	48646858	62064	Loss	2	199715062	199756648	41587	Deletion
1	117042642	117059022	16381	Homozygous deletion	6	48846833	48873200	26368	Loss	2	19980530	19988694	8165	Deletion
1	48488727	48490661	1935	Hemizygous deletion	6	48903516	49113146	209631	Loss	2	200246680	200324949	78270	Deletion
1	110375419	110387808	12390	Duplication	6	49134366	49174547	40182	Loss	2	200274101	200289744	15644	Deletion
1	209514541	209533785	19245	Duplication	6	49377463	49400044	22582	Loss	2	200274101	200292769	18669	Deletion
1	150512915	150536898	23984	Hemizygous deletion	6	49470265	49504857	34593	Loss	2	200300970	200389353	88384	Deletion
1	150512915	150544234	31320	Homozygous deletion	6	49883017	49897263	14247	Gain	2	20043242	20136994	93753	Deletion
1	110269586	110282554	12969	Duplication	6	50385731	50386741	1011	Gain	2	200527374	200532771	5398	Deletion
1	110347990	110387808	39819	Duplication	6	50423394	50448842	25449	Loss	2	20112392	20156529	44138	Deletion
1	154083063	154085168	2106	Homozygous deletion	6	50617205	50628086	10882	Loss	2	201925770	201933463	7694	Duplication
1	149345248	149349488	4241	Hemizygous deletion	6	51333216	51499119	165904	Loss	2	202177828	202179452	1625	Deletion
1	150512915	150536898	23984	Hemizygous deletion	6	51517169	51576751	59583	Loss	2	202372639	202373940	1302	Deletion
1	231110633	231116566	5934	Hemizygous deletion	6	51698879	51729609	30731	Loss	2	20305032	20408273	103242	Deletion
1	107150651	107160334	9684	Duplication	6	51746665	51758466	11802	Gain	2	20314755	20329951	15197	Deletion
1	129803914	129805273	1360	Duplication	6	51896338	52127231	230894	Loss	2	20324918	20331308	6391	Deletion
1	208143967	208160018	16052	Duplication	6	52823887	52852262	28376	Loss	2	203927435	203931426	3992	Duplication
1	264052211	264057275	5065	Duplication	6	53004145	53082726	78582	Loss	2	204093033	204098706	5674	Deletion
1	34487159	34503450	16292	Homozygous deletion	6	53181934	53247140	65207	Loss	2	204135236	204172303	37068	Deletion
1	65627365	65645842	18478	Hemizygous deletion	6	53687028	53759087	72060	Loss	2	204184216	204188593	4378	Deletion
1	83002598	83013747	11150	Hemizygous deletion	6	53903808	53919831	16024	Loss	2	20422878	20505014	82137	Deletion
1	146553279	146579886	26608	Hemizygous deletion	6	53928684	53943533	14850	Loss	2	204524146	204529761	5616	Deletion
1	201959216	201976275	17060	Hemizygous deletion	6	54011835	54080895	69061	Loss	2	20458736	20477414	18679	Deletion
1	239185878	239256562	70685	Hemizygous deletion	6	54161171	54269366	108196	Loss	2	20458736	20505014	46279	Deletion
1	116637047	116655000	17954	Hemizygous deletion	6	54356672	54426298	69627	Loss	2	20458736	20651379	192644	Deletion
1	154083063	154085168	2106	Hemizygous deletion	6	54441278	54478366	37089	Loss	2	20471083	20505014	33932	Deletion
1	172458461	172468191	9731	Hemizygous deletion	6	54495967	54742364	246398	Loss	2	20486412	20505014	18603	Deletion
1	239185878	239266757	80880	Hemizygous deletion	6	55073637	55095348	21712	Loss	2	20504742	20570201	65460	Deletion
1	34487159	34503450	16292	Homozygous deletion	6	55590711	55593566	2856	Loss	2	205465316	205480806	15491	Deletion
1	117042642	117048230	5589	Homozygous deletion	6	55772730	55836217	63488	Loss	2	205465316	205485782	20467	Deletion
1	239185878	239256562	70685	Homozygous deletion	6	57879406	57889872	10467	Loss	2	205465316	205489305	23990	Deletion
1	130731839	130741948	10110	Hemizygous deletion	6	57960472	57967214	6743	Loss	2	20611410	20621841	10432	Deletion
1	153615898	153630638	14741	Hemizygous deletion	6	58010604	58021531	10928	Loss	2	20611410	20636278	24869	Deletion
1	142256291	142259540	3250	Duplication	6	58346304	58353543	7240	Gain	2	20611410	20655735	44326	Deletion
1	34487159	34503450	16292	Homozygous deletion	6	58390445	58398139	7695	Gain	2	20611410	20760180	148771	Deletion
1	239185878	239256562	70685	Hemizygous deletion	6	58627881	58639647	11767	Gain	2	20651379	20704106	52728	Deletion
1	132960912	132967018	6107	Hemizygous deletion	6	58660966	58664670	3705	Gain	2	20655735	20704106	48372	Deletion
1	239185878	239256562	70685	Hemizygous deletion	6	58852709	58872009	19301	Loss	2	20668900	20704106	35207	Deletion
1	110248531	110295948	47418	Duplication	6	59001103	59059514	58412	Loss	2	20778161	20793664	15504	Duplication
1	110375419	110387808	12390	Duplication	6	60566267	60567567	1301	Loss	2	20778161	20806837	28677	Deletion
1	262425216	262443419	18204	Duplication	6	60817247	60836605	19359	Loss	2	20790094	20793664	3571	Duplication
1	117042642	117048230	5589	Homozygous deletion	6	60929731	60958756	29026	Gain	2	20842731	20917817	75087	Deletion
1	112840469	112849270	8802	Hemizygous deletion	6	61587951	61624560	36610	Gain	2	20896364	20926520	30157	Deletion
1	172458461	172468191	9731	Hemizygous deletion	6	62248348	62264868	16521	Gain	2	209200235	209202414	2180	Duplication
1	274161781	274169446	7666	Hemizygous deletion	6	62463265	62472257	8993	Gain	2	209775617	209780967	5351	Deletion
1	110248531	110256941	8411	Duplication	6	63658417	63683095	24679	Loss	2	209775617	209842741	67125	Deletion
1	110375419	110387808	12390	Duplication	6	64204456	64287400	82945	Loss	2	209931092	209962032	30941	Deletion
1	34487159	34503450	16292	Homozygous deletion	6	64390441	64687928	297488	Loss	2	210171937	210210814	38878	Deletion
1	117042642	117048230	5589	Homozygous deletion	6	64927213	64964853	37641	Loss	2	210364711	210384416	19706	Deletion
1	56357364	56393426	36063	Hemizygous deletion	6	65026587	65030660	4074	Loss	2	210682618	210687537	4920	Deletion
1	56859742	56880390	20649	Hemizygous deletion	6	65101203	65325351	224149	Loss	2	210686142	210687537	1396	Deletion
1	80767374	80768504	1131	Hemizygous deletion	6	66050365	66106140	55776	Loss	2	210686142	210690654	4513	Deletion
1	81925353	81951941	26589	Hemizygous deletion	6	66623359	66629699	6341	Gain	2	210888595	210897218	8624	Duplication
1	130283428	130285445	2018	Hemizygous deletion	6	67387253	67394629	7377	Gain	2	210888595	210910406	21812	Deletion
1	135141310	135207772	66463	Hemizygous deletion	6	68640257	68646936	6680	Gain	2	210888595	210919644	31050	Deletion
1	149723804	149750740	26937	Hemizygous deletion	6	69942355	69946362	4008	Loss	2	210888595	210928894	40300	Deletion
[truncated: 37,152 more rows]

## Sheet: Supplementary Table S5
Supplementary Table S5.Genes overlapping with 4769 CNVRs.
Chromosome	CNVR start	CNVR end	Gene start	Gene end	Gene ID
1	234204643	234217738	234205576	234234300	AADACL2
1	57767295	57808589	57669271	57987131	ADGRL2
1	10740505	10765462	10749905	10755364	ADPRHL2
1	24172178	24239181	22749863	24241103	AGBL4
1	76315523	76324357	76299167	76379716	AGL
1	123073	1171464	747098	764765	AGXT
1	108100704	108108820	108093738	108106183	AIM2
1	262217520	262339277	262212759	262224523	AIRE
1	168350490	168359519	168214120	168446988	ALCAM
1	37511912	37527114	37518181	37527879	ANGPTL3
1	123073	1171464	970508	1000001	ANKMY1
1	123073	1171464	495331	509967	ANO7
1	105317903	105352594	105340882	105452763	ARHGEF11
1	156669953	156671475	156627497	156708884	ARL13B
1	51331070	51592391	51410614	51433439	ASB17
1	123073	1171464	197896	212123	ATG4B
1	37692427	37698726	37673707	37771317	ATG4C
1	202205044	202266725	202173405	202285224	ATP11B
1	128708463	128738703	128726064	128734624	ATP5J
1	85799358	85801120	85791908	85801932	ATXN7L2
1	110572272	110619181	110580546	110586760	B4GALT3
1	197642199	197668669	197658258	197682497	BCL6
1	13924530	13935694	13886163	13926348	BMP8A
1	19236889	19252867	19243140	19248508	BTBD19
1	111800260	111817178	111806810	111810908	C1H1orf111
1	262217520	262339277	262283224	262293718	C1H21orf2
1	263924931	263944017	263935147	263945285	C1H21orf58
1	151235336	151278307	151253636	152556909	CADM2
1	151865815	151960925	151253636	152556909	CADM2
1	152159098	152176363	151253636	152556909	CADM2
1	152519179	152549842	151253636	152556909	CADM2
1	123073	1171464	919661	942517	CAPN10
1	261133642	261141262	261133034	261153763	CBS
1	65493888	65545807	65457859	65524349	CCBL2
1	19997296	19998516	19994612	19999118	CCDC17
1	204390980	204436036	204404074	204460692	CCDC39
1	194055271	194086474	194056203	194105098	CCDC50
1	228368658	228382825	228379562	228393720	CCNL1
1	17796999	17814737	17804941	17808915	CDC20
1	109119749	109147584	109085495	109127675	CFAP45
1	103639277	103685644	103660721	103664613	CKS1B
1	78927577	79345729	79190461	79418111	COL11A1
1	79376801	79470433	79190461	79418111	COL11A1
1	263173339	263237732	263182392	263236931	COL18A1
1	62146189	62268412	62138448	62538281	COL24A1
1	263772088	263840396	263766217	263783506	COL6A2
1	269455351	269620952	269444011	269614155	COL6A6
1	10740505	10765462	10756459	10761140	COL8A2
1	14665662	14670121	14667737	14683606	COL9A2
1	102806607	102811207	102806517	102811627	CREB3L4
1	123073	1171464	702528	734284	CROCC2
1	91120086	91132787	91109431	91144714	CSDE1
1	86275425	86280837	86263155	86283984	CSF1
1	60838767	60897839	60886119	60899506	CTBS
1	123073	1171464	133789	158785	D2HGDH
1	7272046	7296424	7277191	7361601	DGKD
1	37511912	37527114	37408896	37600933	DOCK7
1	74094095	74107151	73347330	74275449	DPYD
1	17796999	17814737	17809090	17813902	ELOVL1
1	235354192	235372933	235334843	235377095	ERICH6
1	10922185	10972937	10937422	10938814	EVA1B
1	68860478	68885581	68872517	69114261	EVI5
1	28748558	28769987	28746449	28761440	FAM151A
1	259446862	259461363	259455163	259513257	FAM3B
1	69187365	69209647	69158694	69283004	FAM69A
1	123073	1171464	301039	403182	FARP2
1	110572272	110619181	110616340	110620068	FCER1G
1	109017046	109018860	109012257	109024456	FCRL6
1	103639277	103685644	103666962	103673130	FLAD1
1	49731406	49870483	49862081	49870682	FPGT
1	263772088	263840396	263794941	263810502	FTCD
1	128708463	128738703	128686203	128726268	GABPA
1	271055840	271063257	271042280	271063471	GALNT15
1	147621131	147695484	147485504	147792198	GBE1
1	147743618	147853717	147485504	147792198	GBE1
1	65672804	65856555	65672668	65689009	GBP5
1	68636064	68666651	68614891	68660989	GLMN
1	104260926	104333787	104223062	104307345	GON4L
1	171974379	171980780	171963373	171992432	GUCA1C
1	2069474	2081593	1956394	2198202	HDAC4
1	2142799	2232076	1956394	2198202	HDAC4
1	105166875	105194200	105168690	105181746	HDGF
1	123073	1171464	432761	490604	HDLBP
1	67698440	67811269	67680171	67807144	HFM1
1	15794456	15819430	15816274	15937865	HIVEP3
1	236999406	237020166	236975818	237035468	HLTF
1	140978420	141051447	141021137	141034533	HSPA13
1	109119749	109147584	109136710	109156264	IGSF9
1	103122344	103127419	103107759	103163460	IL6R
1	123073	1171464	164262	176934	ING5
1	7516232	7523412	7521703	7654763	INPP5D
1	226253194	226276407	226139658	226357279	IQCJ
1	104966494	104969918	104963762	105001312	IQGAP3
1	98121016	98127870	98111247	98128616	ITGA10
1	110238914	110414616	110286437	110294096	ITLN
1	229406490	229456326	229052842	229501582	KCNAB1
1	274455329	274465484	274223952	274687498	KCNH8
1	123073	1171464	794470	877315	KIF1A
1	28217137	28241351	28225114	28237695	LDLRAD1
1	141207174	141223368	141199648	141278398	LIPI
1	104570466	104617783	104598536	104618698	LMNA
1	188368558	188382342	188327322	188433515	LRCH3
1	188389985	188409354	188327322	188433515	LRCH3
1	44833405	44853538	44837910	45461095	LRRC7
1	44908422	44938334	44837910	45461095	LRRC7
1	45138805	45226122	44837910	45461095	LRRC7
1	105317903	105352594	105327227	105340890	LRRC71
1	3254292	3271788	3175971	3278528	LRRFIP1
1	49731406	49870483	49665976	49862044	LRRIQ3
1	179071199	179150800	178656559	179360619	LSAMP
1	179168766	179193763	178656559	179360619	LSAMP
1	263772088	263840396	263836789	263868476	LSS
1	125200234	125220248	125198163	125255736	LTN1
1	200556276	200558566	200557063	200558675	MAGEF1
1	20250231	20261701	20189141	20370094	MAST2
1	20355515	20369907	20189141	20370094	MAST2
1	192390505	192482099	192396885	192716067	MB21D2
1	189559216	189579918	189552958	189580811	MFI2
1	20872287	20880171	20878398	20926728	MKNK1
1	3417932	3436288	3409832	3458974	MLPH
1	17796999	17814737	17785348	17800312	MPL
1	117802927	117810338	117809461	117896579	MPZL1
1	51331070	51592391	51319623	51404529	MSH4
1	188589558	188598986	188582359	188630422	MUC4
1	85640452	85641678	85636099	85657485	MYBPHL
1	209514541	209533785	209241427	210874124	NAALADL2
1	209628581	209652581	209241427	210874124	NAALADL2
1	209746895	209845887	209241427	210874124	NAALADL2
1	209970265	210031347	209241427	210874124	NAALADL2
1	210535206	210576373	209241427	210874124	NAALADL2
1	210613956	210692409	209241427	210874124	NAALADL2
1	133561071	133586794	133468479	134074276	NCAM2
1	133611474	133873358	133468479	134074276	NCAM2
1	133905848	133964363	133468479	134074276	NCAM2
1	110572272	110619181	110607367	110616294	NDUFS2
1	46841419	46854545	46640177	47668502	NEGR1
1	47401492	47496318	46640177	47668502	NEGR1
1	105093945	105095542	105092744	105101979	NES
1	211179272	211212222	211024890	212002363	NLGN1
1	211411722	211489509	211024890	212002363	NLGN1
1	189246818	189252820	189244778	189252423	NRROS
1	62779816	62780993	62743115	62780496	ODF2L
1	78125892	78226301	78199200	78426585	OLFM3
1	78317243	78330205	78199200	78426585	OLFM3
1	188114685	188138778	188062873	188164150	OSBPL11
1	1220137	1236506	1233587	1235199	OTOS
1	234738957	234742228	234738284	234800900	P2RY14
1	104704189	104719158	104712605	104722351	PAQR6
1	185112942	185122413	185113030	185161637	PARP14
1	123073	1171464	550349	580947	PASK
1	263555137	263558472	263513008	263570689	PCBP3
1	264050343	264057275	263951972	264057781	PCNT
1	260865316	260876779	260864996	260944974	PDE9A
1	21463082	21479990	21469368	21474761	PDZK1IP1
1	105317903	105352594	105300703	105326486	PEAR1
1	205122293	205132222	205083187	205364186	PEX5L
1	205217576	205238523	205083187	205364186	PEX5L
1	262217520	262339277	262240532	262261989	PFKL
1	189486975	189490698	189485685	189492928	PIGZ
1	205980931	205999058	205904440	205989643	PIK3CA
1	65329954	65374114	65236597	65378319	PKN2
1	271942805	271975014	271851619	271963275	PLCL2
1	19236889	19252867	19235084	19240509	PLK3
1	240305646	240361477	240249168	240372130	PLOD2
1	244125234	244205919	244190226	244316841	PLS1
1	110572272	110619181	110576565	110580449	PPOX
1	123073	1171464	526516	542774	PPP1R7
1	105166875	105194200	105192535	105218210	PRCC
1	259995812	259997066	259967416	260029716	PRDM15
1	215043287	215051554	214981545	215051409	PRKCI
1	17972728	18039883	17961333	18045787	PTPRF
1	228077815	228079874	228078905	228085039	PTX3
1	262049847	262133696	262052066	262064360	PWP2
1	103639277	103685644	103644983	103650359	PYGO2
1	3394581	3397184	3355947	3396122	RAB17
1	3112486	3125341	3086788	3128262	RAMP1
1	198488958	198496709	198495741	198508933	RFC4
1	79853227	79884176	79866944	79901070	RNPC3
1	145580804	146829966	144440605	145730515	ROBO1
1	142372897	142459266	141848156	143332463	ROBO2
1	68636064	68666651	68660953	68776114	RPAP2
1	227304700	227322687	226912712	227361315	RSRC1
1	115344770	115349657	115318995	115371422	RXRG
1	102509360	102527315	102522007	102525660	S100A1
1	102509360	102527315	102508282	102515297	S100A16
1	2943259	2974971	2968203	2998200	SCLY
1	27043519	27112825	27108592	27200586	SCP2
1	100043947	100053169	100041092	100050027	SELENBP1
1	164082101	164181011	164047061	164186542	SENP7
1	123073	1171464	404590	425787	SEPT2
1	41706116	41733649	41703626	41937939	SGIP1
1	10922185	10972937	10922500	10936873	SH3D21
1	103639277	103685644	103650457	103660290	SHC1
1	220147771	220320982	220153657	220268466	SI
1	214924009	214942288	214919801	214947207	SKIL
1	187687278	187696314	187623649	187774752	SLC12A8
1	175184020	175262681	175134028	175250558	SLC9C1
1	123073	1171464	592820	689362	SNED1
1	75112721	75119594	75067472	75240421	SNX7
1	120037227	120045009	120015905	120046913	SON
1	60838767	60897839	60825793	60895221	SPATA1
1	212312049	212318134	212242425	212511421	SPATA16
1	263772088	263840396	263812791	263830695	SPATC1L
1	60979811	60989778	60961995	61020097	SSX2IP
1	51792626	51805794	51649820	52288598	ST6GALNAC3
1	52222844	52291767	51649820	52288598	ST6GALNAC3
1	88961481	89002941	88955654	89023021	ST7L
1	10922185	10972937	10948013	10966364	STK40
1	156669953	156671475	156670662	156687718	STX19
1	183861352	184033644	183733453	184057849	STXBP5L
1	91217512	91386296	91236612	91371564	SYCP1
1	109119749	109147584	109127834	109135167	TAGLN2
1	271942805	271975014	271965200	272561957	TBC1D5
1	19236889	19252867	19240492	19241781	TCTEX1D4
1	10740505	10765462	10744550	10748931	TEKT2
1	123073	1171464	212657	248024	THAP4
1	253666436	253680367	253637539	253708661	TOPBP1
1	262049847	262133696	261973800	262051007	TRAPPC10
1	98310442	98311564	98311364	98311435	TRNAH-GUG
1	244125234	244205919	244128489	244186672	TRPC1
1	262217520	262339277	262310384	262350225	TRPM2
1	93480457	93482585	93464713	93515508	TTF2
1	60131671	60173777	60142097	60311781	TTLL7
1	115900720	115912570	115891454	115916581	UCK2
1	260279035	260291220	260223334	260310028	UMODL1
1	121220014	121241868	121199442	121276689	URB1
1	121265385	121275938	121199442	121276689	URB1
1	37401835	37405688	37395599	37406892	USP1
1	110572272	110619181	110569252	110575929	USP21
1	139386254	139450109	139385805	139552373	USP25
1	139534175	139546368	139385805	139552373	USP25
1	7272046	7296424	7190330	7273857	USP40
1	260990333	261000488	260995560	261014863	WDR4
1	263924931	263944017	263923009	263927938	YBEY
1	103639277	103685644	103681547	103695651	ZBTB7B
1	26580439	26695660	26551423	26687257	ZCCHC11
1	10040970	10127149	9988528	10157322	ZMYM4
1	66540738	66552319	66528588	66565603	ZNF326
1	275323933	275401369	275348789	275362964	ZNF596
1	67428977	67451177	67428741	67523259	ZNF644
1	19515981	19636191	19424177	19590877	ZSWIM5
2	174851948	174865631	174847994	174910207	ACMSD
2	41148062	41162530	41141228	41163899	ADAMDEC1
2	1869287	1957905	1867239	1874280	ADI1
2	228785126	228801268	228726913	228811871	AGFG1
2	116471065	116478397	116456731	116477295	AMMECR1L
2	198085585	199556459	198238519	198479012	ANKRD44
2	111372994	111426216	111340962	111428246	ANXA10
2	165363147	165377284	165192462	165900760	ARHGAP15
2	165728091	165748811	165192462	165900760	ARHGAP15
2	165808024	165845514	165192462	165900760	ARHGAP15
2	247810595	247883893	247783070	247924516	ARHGEF10L
2	248727429	248737462	248721099	248736668	ARHGEF19
2	133906178	134008771	133837898	133917849	ATF2
2	248377929	248410899	248392206	248410137	ATP13A2
2	26123884	26148886	26071786	26262257	AUH
2	215726908	215740258	215695057	215782342	BARD1
2	27508007	27532537	27521171	27524508	BARX1
2	149099034	149118993	148974823	149301148	BAZ2B
2	149201363	149364598	148974823	149301148	BAZ2B
2	42788158	42797557	42756580	42807360	BIN3
2	43186684	43201628	43184242	43230138	BMP1
2	198085585	199556459	198916389	198979202	BOLL
2	10310912	10319396	10318013	10346010	BSPRY
2	209200235	209202414	209169924	209200745	C2H2orf80
2	42827337	42878529	42823628	42832085	C2H8orf58
2	11762036	11785810	11741579	11836993	C2H9orf84
2	120839542	120873249	120843412	120968915	CALCRL
2	246049429	246056947	246014163	246149361	CAPZB
2	61323260	61333303	61309512	61348644	CARNMT1
2	150283239	150436588	150134932	150477144	CCDC148
2	22751425	22757492	22754507	22763191	CDK20
2	3045114	3071825	2897717	3079063	CDK5RAP2
2	28765563	28784524	28589712	28826555	CENPP
2	202372639	202373940	202362246	202425088	CFLAR
2	133906178	134008771	133968674	134183107	CHN1
2	202177828	202179452	202171169	202178442	CLK1
2	85090152	85348837	85021167	85372534	CNTLN
2	143758737	143763643	143696657	143769680	COBLL1
2	234849961	234894398	234860850	234916131	COL16A1
2	9427885	9457437	9410222	9559195	COL27A1
2	119229222	119268754	119227288	119267823	COL3A1
2	228531386	228592396	228427726	228585952	COL4A3
2	228381581	228391770	228280498	228419711	COL4A4
2	1869287	1957905	1931604	1954488	COLEC11
2	198085585	199556459	198697035	198714353	COQ10B
2	87269397	87292175	87215778	87326838	DENND4C
2	90117921	90152087	90149432	90161840	DMRTA1
2	43254907	43311086	43309456	43323853	DMTN
2	179051694	179081564	178565400	180206200	DPP10
2	179563576	179661414	178565400	180206200	DPP10
2	179827074	179892029	178565400	180206200	DPP10
2	136925021	136933722	136903654	136958569	DYNC1I2
2	248759351	248800026	248771345	248799905	EPHA2
2	243130820	243144745	243109943	243146608	EPHA8
2	212491652	212578244	212091751	213385983	ERBB4
2	212798713	212812602	212091751	213385983	ERBB4
2	213081402	213203199	212091751	213385983	ERBB4
2	43254907	43311086	43288099	43301424	FAM160B2
2	121388987	121498801	121473424	121555430	FAM171B
2	223791091	223802978	223743023	223812739	FARSB
2	43342791	43355405	43342501	43347519	FGF17
2	238530703	238576755	238561704	238575356	FGR
2	144849255	144866529	144853017	144988497	FIGN
2	144948977	144984338	144853017	144988497	FIGN
2	10545543	10547104	10484873	10550276	FKBP15
2	36115801	36155201	35971535	36381417	FRMD3
2	154071095	154150308	153959591	154608046	GALNT13
2	154398660	154435733	153959591	154608046	GALNT13
2	154585552	154595215	153959591	154608046	GALNT13
2	106695852	106726584	106521080	108008281	GALNTL6
2	106748571	106784543	106521080	108008281	GALNTL6
2	107296607	107330885	106521080	108008281	GALNTL6
2	74001948	74143129	74007695	74096579	GLDC
2	104885388	104918492	104827540	105022676	GLRA3
2	220380358	220401489	220398691	220406053	GMPPA
2	241455928	241476453	241456726	241496476	GRHL3
2	2214803	2250891	2181861	2229842	GSN
2	234943932	234952467	234945012	234956088	HCRTR1
2	10310912	10319396	10313434	10316553	HDHD3
2	197385000	197895553	197399974	197851118	HECW2
2	132892087	132905346	132899503	132902661	HOXD10
2	132892087	132905346	132894431	132899468	HOXD9
2	43254907	43311086	43261429	43277486	HR
2	116055333	116109391	116061032	116062994	HS6ST1
2	243761055	243848835	243781657	243856066	HSPG2
2	245819263	245862025	245840555	245853278	HTR6
2	238530703	238576755	238530640	238534368	IFI6
2	146352885	146402646	146368153	146429840	IFIH1
2	94652822	94684737	94644224	94757000	IFT74
2	210682618	210690654	210666697	210798636	KANSL1L
2	146070214	146102313	145785925	146324646	KCNH7
2	133029486	133053984	133011855	133110982	KIAA1715
2	102416813	102430222	102416077	102599262	KIF13B
2	159454910	159466686	159419573	159595937	KIF5C
2	247001390	247010475	247004672	247008086	KLHDC7A
2	116739211	116754863	116717561	116739473	LIMS2
2	96320076	96338270	95654790	97086138	LINGO2
2	166952674	167127852	166948548	169135064	LRP1B
2	167219792	167343661	166948548	169135064	LRP1B
2	167564604	167600135	166948548	169135064	LRP1B
2	167804020	167893410	166948548	169135064	LRP1B
2	167938559	168007213	166948548	169135064	LRP1B
2	168301669	168439570	166948548	169135064	LRP1B
2	168549976	168661088	166948548	169135064	LRP1B
2	94652822	94684737	94666046	94681695	LRRC19
2	45341931	45371273	45281048	45349528	LZTS1
2	210171937	210210814	210094918	210394834	MAP2
2	210364711	210384416	210094918	210394834	MAP2
2	238791220	238821304	238785937	238799737	MAP3K6
2	160111429	160167114	159922229	160113386	MBD5
2	51769155	51786225	51742055	51808457	MELK
2	138654475	138664137	138654995	138664231	METTL5
2	228531386	228592396	228591784	228619932	MFF
2	12653859	12656836	12600918	12698413	MUSK
2	116739211	116754863	116740114	116837404	MYO7B
2	723089	944335	848421	949142	MYT1L
2	204093033	204098706	204015571	204182386	NBEAL1
2	204135236	204172303	204015571	204182386	NBEAL1
2	156728237	156736706	156690312	156893984	NEB
2	117645826	117662716	117639851	117664537	NEMP2
2	43342791	43355405	43352052	43367916	NPM2
2	43254907	43311086	43283320	43286242	NUDT18
2	237497390	237506896	237500372	237544400	OPRD1
2	160395558	160521167	160401372	160496711	ORC4
2	130671451	130683051	130615139	130776455	OSBPL6
2	248183855	248210385	248149748	248201364	PADI1
2	248046600	248087987	248034196	248054440	PADI6
2	51484176	51491308	51406263	51597189	PAX5
2	51583376	51589001	51406263	51597189	PAX5
2	246768188	246797153	246748128	246898839	PAX7
2	101025755	101052380	101025366	101052713	PBK
2	126080830	126153637	126139228	126528015	PDE1A
2	42827337	42878529	42835341	42848928	PDLIM2
2	198085585	199556459	198123457	198197404	PGAP1
2	233423903	233431449	233339310	233459933	PHC2
2	27785516	27798299	27777996	27866647	PHF2
2	245393037	245394152	245391429	245442827	PLA2G2D
2	245399117	245449200	245391429	245442827	PLA2G2D
2	245393037	245394152	245386269	245396697	PLA2G2F
2	198085585	199556459	199002291	199376076	PLCL1
2	72973549	73008454	73007925	73052553	PLGRKT
2	118212289	118363538	118231689	118431309	PMS1
2	50987477	51018203	50985894	51002621	POLR1E
2	58102875	58156227	58139556	58167245	PSAT1
2	13936335	13944077	13789357	13947700	PTPN3
2	77732470	77778907	75711747	78193980	PTPRD
2	77796983	77835093	75711747	78193980	PTPRD
2	220214143	220228818	220211341	220230596	PTPRN
2	70644667	70664007	70654517	70708582	PUM3
2	723089	944335	771318	821893	PXDN
2	198085585	199556459	198786706	198884110	RFTN2
2	72973549	73008454	72972185	72974131	RLN2
2	103374377	103392753	103345984	103382416	RP1L1
2	239442012	239485769	239439592	239464407	RPS6KA1
2	1869287	1957905	1923748	1928654	RPS7
2	142341088	142343736	142287237	142463962	SCN1A
2	143072551	143077949	143037067	143180207	SCN2A
2	143236824	143252878	143225383	143346474	SCN3A
2	248377929	248410899	248360515	248383788	SDHB
2	24131543	24142303	24053052	24139259	SEMA4D
2	129866142	129908945	129733589	129881156	SESTD1
2	198085585	199556459	198636780	198696849	SF3B1
2	239683094	239709124	239706794	239708277	SH3BGRL3
2	146938785	147012531	146744519	147095289	SLC4A10
2	42827337	42878529	42852324	42889559	SORBS3
2	214281647	214345011	214232408	215355848	SPAG16
2	214551032	214589893	214232408	215355848	SPAG16
2	214800346	214819153	214232408	215355848	SPAG16
2	215120425	215178938	214232408	215355848	SPAG16
2	229277925	229301849	229172741	229363151	SPHKAP
2	138654475	138664137	138662944	138672175	SSB
2	156192872	156277234	156274370	156323623	STAM2
2	241455928	241476453	241395310	241456632	STPG1
2	12822948	12836010	12776720	12977818	SVEP1
2	238791220	238821304	238799886	238809702	SYTL1
2	185499833	185531353	185481343	185551662	TFCP2L1
2	120791320	120804736	120744082	120831110	TFPI
2	172486163	172508069	171875603	172949664	THSD7B
2	137504212	137532273	137410290	137591611	TLK1
2	245819263	245862025	245734831	245838817	TMCO4
2	476257	505655	487649	492687	TMEM18
2	238791220	238821304	238812193	238823005	TMEM222
2	156994111	157004160	156993483	157011270	TNFAIP6
2	723089	944335	718327	748993	TPO
2	2569076	2603521	2585077	2608129	TRAF1
2	1842260	1859123	1821623	1859296	TRAPPC12
2	49379849	49381803	49355655	49383391	TRIM14
2	1701982	1761928	1744752	1818649	TSSC1
2	142503993	142518703	142479666	142574186	TTC21B
2	130351945	130357891	130206206	130483885	TTN
2	130446267	130460081	130206206	130483885	TTN
2	239683094	239709124	239683266	239706115	UBXN11
2	173961657	173976405	173954016	173985650	UBXN4
2	203927435	203931426	203913605	203941145	WDR12
2	149201363	149364598	149316146	149381962	WDSUB1
2	28109556	28113138	28074338	28229057	WNK2
2	219589707	219590970	219585255	219604347	ZNF142
2	129314244	129327427	129075333	129560323	ZNF385B
2	101627786	101647398	101621776	101666973	ZNF395
2	123710167	123809814	123531052	123879441	ZNF804A
2	174314448	174388031	174166806	174461016	ZRANB3
2	121388987	121498801	121422790	121442650	ZSWIM2
3	192780758	192791339	192784325	192949942	ABCC9
3	147260420	147477907	147408511	147498706	ABCD2
3	69687013	69697767	69512817	69697268	ACYP2
3	2409041	2496586	2443687	2476204	ADAMTS13
3	2309915	2349272	2345918	2379546	ADAMTSL2
3	223677441	223743624	223703043	223704331	ADM2
3	103990827	103994753	103991792	103995458	ADRA2B
3	43512647	43520218	43506229	43577990	AFTPH
3	43546071	43547492	43506229	43577990	AFTPH
3	2678743	2719379	2686070	2698330	AGPAT2
3	46586381	46667618	46665296	46684727	AHSA2
3	5513239	5519745	5495189	5520973	AIF1L
3	173397390	173414182	173411713	173470784	ALDH1L2
3	223222127	223329192	223256185	223265150	ALG12
3	36224485	36299687	35830774	36564588	ALK
3	95214839	95217093	95182256	95374098	ALMS1
3	1297799	1959441	1727312	1735540	ANAPC2
3	134077889	134098575	134081909	134090668	ANKRD33
3	168682628	168752006	167731416	168880678	ANKS1B
3	168837007	168857833	167731416	168880678	ANKS1B
3	161569402	161597140	161569534	161576852	ARHGEF25
3	366945	384045	383433	406574	ARRDC1
3	223844595	223902379	223860756	223864040	ARSA
3	38197305	38207058	38202809	38207696	ASPRV1
3	219960766	220001606	219840142	219962669	ATXN10
3	211173751	211189269	211170909	211187158	B4GALNT3
3	212881470	212908475	212882671	212889406	BID
3	163235697	163258124	163247868	163251499	BLOC1S1
3	175611026	175692480	175423833	175750358	BTBD11
3	147260420	147477907	147299263	147408380	C3H12orf40
3	173397390	173414182	173390639	173403995	C3H12orf45
3	35717014	35735535	35725271	35736076	C3H2orf71
3	7893267	7975630	7966808	7971469	C3H9orf16
3	2775975	3184256	3178521	3182961	C3H9orf69
3	2409041	2496586	2435701	2442880	CACFD1
3	212279898	212285407	212157941	212544872	CACNA1C
3	214800644	214821896	214722658	214852505	CACNA1I
3	211984557	212015316	211981260	212051461	CACNA2D4
3	3397915	3543055	3361914	3406122	CAMSAP1
3	2775975	3184256	2971115	2978369	CARD9
3	7459596	7467150	7429733	7460915	CCBL1
3	96117992	96134600	96128854	96136497	CCDC142
3	525296	1184597	862360	871637	CCDC183
3	2775975	3184256	3031774	3047089	CCDC187
3	68427792	68500432	68406824	68525029	CCDC88A
3	68510983	68524770	68406824	68525029	CCDC88A
3	185984440	186017718	185706850	186137244	CCDC91
3	163235697	163258124	163238279	163241675	CD63
3	220409326	220454453	220423375	220431931	CDPF1
3	216655693	216701812	216698875	216710651	CENPM
3	43005354	43041309	43037536	43063610	CEP68
3	7750502	7766455	7754075	7765850	CERCAM
3	8358867	8383604	8363017	8369871	CFAP157
3	216149530	216163961	216144366	216155525	CHADL
3	7893267	7975630	7948467	7965826	CIZ1
3	148981433	148992024	148990341	149116397	CNOT2
3	149084922	149144858	148990341	149116397	CNOT2
3	145801697	145816174	145641947	146060068	CNTN1
3	1297799	1959441	1367380	1441936	COL5A1
3	148092190	148170930	148056039	148320002	CPNE8
3	12250430	12264059	12242390	12261845	CRB2
3	23699010	23897046	23779914	23811570	DDX1
3	11864518	11870209	11750215	12241972	DENND1A
3	7893267	7975630	7894942	7938934	DNM1
3	181626876	181664798	181628364	181691621	DNM1L
3	7268640	7280563	7272203	7281199	DOLPP1
3	8113277	8164575	8150892	8155634	DPM2
3	161569402	161597140	161577254	161582212	DTX3
3	128841964	128904338	128841461	129057440	EEA1
3	2678743	2719379	2699148	2702214	EGFL7
3	258631	297502	264526	343264	EHMT1
3	206768349	206880308	206717883	206777308	EM4B
3	138476640	138487670	138479753	138497221	ENDOU
3	525296	1184597	698017	772005	EXD3
3	104069214	104084482	104077087	104087474	FAHD2A
3	8113277	8164575	8111223	8147561	FAM102A
3	216810777	216837196	216817347	216820304	FAM109B
3	8473088	8522240	8489552	8542593	FAM129B
3	8538625	8552412	8489552	8542593	FAM129B
3	46102458	46113128	46084592	46113583	FAM161A
3	2309915	2349272	2341110	2342786	FAM163B
3	103395274	103438193	103331451	103430664	FAM178B
3	157595089	157610188	157039505	157605161	FAM19A2
3	222261255	222457124	222253982	222437646	FAM19A5
3	183140571	183168200	183148035	183177020	FAM60A
3	7300275	7315530	7297223	7318310	FAM73B
3	102351404	102375154	102350889	102352008	FBXL14
3	175942540	176014923	175941829	175961117	FBXO7
3	1297799	1959441	1328439	1337537	FCN1
3	87229344	87259608	87238949	87282777	FEZ2
3	187391578	187409164	187406191	187429088	FGFR1OP2
3	210649797	210701150	210696383	210703749	FKBP4
3	210649797	210701150	210638657	210650710	FOXM1
3	3672600	3728450	3665354	3673997	GBGT1
3	62568123	62628374	62494188	62572816	GCFC2
3	111175233	111190102	111138569	111195668	GLIPR1
3	111194914	111199879	111138569	111195668	GLIPR1
3	3397915	3543055	3513512	3528102	GLT6D1
3	7893267	7975630	7877377	7894344	GOLGA2
3	104069214	104084482	104064059	104076769	GPAT2
3	97041571	97055653	97052957	97057218	GPR45
3	2775975	3184256	2984855	3004502	GPSM1
3	220793123	220814510	220780593	220821595	GRAMD4
3	133944126	133991759	133979285	133983431	GRASP
3	20307672	20661472	20239246	20366975	GREB1
3	144437466	144454697	144428642	144477606	GXYLT1
3	223548985	223612088	223566482	223573438	HDAC10
3	153185618	153236783	153180246	153245884	HELB
3	6117862	6156087	6060028	6215658	HMCN2
3	132170281	132274464	132217617	132223267	HOXC10
3	132170281	132274464	132231974	132235415	HOXC11
3	132170281	132274464	132250664	132253254	HOXC12
3	132170281	132274464	132260521	132269131	HOXC13
3	132170281	132274464	132173583	132177952	HOXC5
3	132170281	132274464	132195585	132199430	HOXC8
3	132170281	132274464	132205316	132208814	HOXC9
3	223222127	223329192	223325562	223340828	IL17REL
3	180120766	180152504	180146102	180167871	IL2RB
3	2775975	3184256	2918117	2928650	INPP5E
3	210870015	210871886	210765673	210887202	IQSEC3
3	210877033	210932492	210765673	210887202	IQSEC3
3	210649797	210701150	210679845	210689910	ITFG2
3	163235697	163258124	163257841	163281404	ITGA7
3	187627084	187646372	187546311	188152028	ITPR2
3	188115595	188134223	187546311	188152028	ITPR2
3	3397915	3543055	3416044	3487561	KCNT1
3	102173815	102195134	102123811	102198232	KIAA1211L
3	62568123	62628374	62622782	62679827	KIAA1841
3	31259673	31264244	31034125	31278316	KLHL29
3	111194914	111199879	111194593	111209023	KRR1
3	5592704	5606841	5524908	5593446	LAMC3
3	7893267	7975630	7966808	7978323	LCN2
3	3397915	3543055	3510196	3512245	LCN9
3	154318689	154334718	154247456	154342991	LEMD3
3	2775975	3184256	3106138	3115159	LHX3
3	223677441	223743624	223724596	223728827	LMF2
3	161904250	162048790	161929859	162002646	LRP1
3	80060457	80074682	80072505	80171859	LRPPRC
3	120958780	120981550	120970480	121189700	LRRIQ1
3	121119526	121199198	120970480	121189700	LRRIQ1
3	8538625	8552412	8545130	8580552	LRSAM1
3	525296	1184597	824755	833092	MAMDC4
3	223548985	223612088	223573573	223578197	MAPK12
3	223844595	223902379	223841932	223851080	MAPK8IP2
3	217673711	217808786	217689483	217704942	MCAT
3	151183551	151189690	151164576	151193550	MDM1
3	41714993	41730951	41579686	41727043	MEIS1
3	91703526	91727739	91675085	91725845	MEMO1
3	182758797	182767665	182767008	182776952	METTL20
3	132921573	132950409	132927443	132929622	MFSD5
3	102351404	102375154	102268979	102389852	MGAT4A
3	122090161	122125547	121974440	122837985	MGAT4C
3	122683300	122711196	121974440	122837985	MGAT4C
3	223677441	223743624	223710825	223713487	MIOX
3	95760139	95772490	95766842	95792427	MOB1A
3	96117992	96134600	96118962	96122427	MOGS
3	217993998	218029534	217968945	218039679	MPPED1
3	101892968	101899147	101885883	101909539	MRPL30
3	207627488	207652986	207627696	207629030	MRPL51
3	96117992	96134600	96124910	96128823	MRPL53
3	81187916	81192919	81160046	81378102	MTA3
3	161904250	162048790	162039315	162045096	NAB2
3	3274985	3348026	3243549	3280365	NACC2
3	8044554	8068899	8044888	8050843	NAIF1
3	23699010	23897046	23408474	23739865	NBAS
3	223677441	223743624	223729229	223739890	NCAPH2
3	1297799	1959441	1749379	1757189	NDOR1
3	161904250	162048790	161906145	161908419	NDUFA4L2
3	216810777	216837196	216826253	216835923	NDUFA6
3	141294959	141304134	141270598	141742989	NELL2
3	211173751	211189269	211188328	211260564	NINJ2
3	207569823	207571059	207570932	207579797	NOP2
3	2775975	3184256	2847499	2872512	NOTCH1
3	525296	1184597	688736	697355	NOXA1
3	133944126	133991759	133939214	133954148	NR4A1
3	210649797	210701150	210671352	210679434	NRIP2
3	73097776	73193356	73066113	74278588	NRXN1
3	73330632	73443762	73066113	74278588	NRXN1
3	525296	1184597	523546	666320	NSMF
3	59993889	59997124	59989711	59995755	NT5DC4
3	20307672	20661472	20375812	20383152	NTSR2
3	161904250	162048790	161917079	161925512	NXPH4
3	1213520	1222296	1188795	1226521	OLFM1
3	33471992	33475031	33419654	33510309	OTOF
3	170838368	170854424	170792829	170853123	PARPBP
3	218449086	218613500	218498603	218612984	PARVB
3	218623111	218659817	218620987	218650876	PARVG
3	38055877	38102242	38098777	38100379	PCBP1
3	145329164	145380955	145097834	145520274	PDZRN4
3	219137822	219185373	219151699	219269503	PHF21B
3	196151176	196186180	195922757	196412849	PIK3C2G
3	196277730	196302598	195922757	196412849	PIK3C2G
3	161569402	161597140	161583588	161596130	PIP4K2C
3	8113277	8164575	8156034	8165116	PIP5KL1
3	7552163	7557303	7546067	7559534	PKN3
3	195369467	195376390	195149798	195414356	PLEKHA5
3	223548985	223612088	223589622	223607826	PLXNB2
3	170838368	170854424	170853280	170855015	PMCH
3	2775975	3184256	2928519	2938068	PMPCA
3	218324169	218363633	218359527	218375057	PNPLA5
3	97246141	97262229	97260184	97261689	POU3F3
3	220409326	220454453	220352272	220416312	PPARA
3	115550201	115561485	115484615	115655544	PPP1R12A
3	223677441	223743624	223664295	223696335	PPP6R2
3	78437683	78443170	77913448	78461119	PRKCE
3	136279215	136281841	136268735	136289334	PRPF40B
3	5224336	5248623	5211562	5285459	PRRC2B
3	8358867	8383604	8360472	8362943	PTRH1
3	2775975	3184256	3078055	3104968	QSOX2
3	12496447	12507347	12504923	12666388	RABGAP1
3	525296	1184597	847350	861889	RABL6
3	25407303	25430764	25419619	25426257	RAD51AP2
3	3672600	3728450	3708779	3733823	RALGDS
3	216149530	216163961	216159925	216185554	RANGAP1
3	5096085	5112466	4989257	5110546	RAPGEF1
3	163235697	163258124	163243191	163247867	RDH5
3	2409041	2496586	2480852	2488023	REXO4
3	174998347	175009854	174913826	175021261	RIC8B
3	218449086	218613500	218439169	218470857	SAMM50
3	2197132	2288838	2200201	2256512	SARDH
3	217673711	217808786	217768573	217894328	SCUBE1
3	2775975	3184256	2938105	2944701	SDCCAG3
3	162211509	162241869	162228813	162238675	SDR9C7
3	2775975	3184256	2890127	2916556	SEC16A
3	103395274	103438193	103437482	103444488	SEMA4C
3	94794614	94808520	94742485	94872458	SFXN5
3	62060121	62093966	62062938	62148522	SH3RF3
3	62133356	62140582	62062938	62148522	SH3RF3
3	223844595	223902379	223876952	223922208	SHANK3
3	216655693	216701812	216675329	216680413	SHISA8
3	161904250	162048790	161908602	161913884	SHMT2
3	159505003	159516040	159333526	159539728	SLC16A7
3	8044554	8068899	8011532	8044890	SLC25A25
3	147035104	147078878	146738594	147256312	SLC2A13
3	147137560	147240514	146738594	147256312	SLC2A13
3	2409041	2496586	2424334	2434031	SLC2A6
3	210877033	210932492	210896879	210916406	SLC6A12
3	210877033	210932492	210919660	210958698	SLC6A13
3	216810777	216837196	216821635	216825229	SMDT1
3	2775975	3184256	2947348	2968677	SNAPC4
3	3397915	3543055	3491406	3498690	SOHLH1
3	190751162	190775223	190022421	191171657	SOX5
3	133060664	133090792	133060113	133073937	SPRYD3
3	69302914	69305897	69139696	69350166	SPTBN1
3	216655693	216701812	216609027	216672985	SREBF2
3	192488561	192497263	192401125	192584084	ST8SIA1
3	161904250	162048790	162024350	162039192	STAT6
3	2409041	2496586	2488112	2511345	STKLD1
3	8358867	8383604	8374485	8412147	STXBP1
3	56021258	56029172	56010983	56047363	SUCLG1
3	218324169	218363633	218326549	218342815	SULT4A1
3	175942540	176014923	175963647	176440791	SYN3
3	176268783	176290292	175963647	176440791	SYN3
3	176388769	176407694	175963647	176440791	SYN3
3	114898957	114952771	114742194	115237316	SYT1
3	180831319	180941051	180894987	181008674	SYT10
3	207627488	207652986	207645961	207654835	TAPBPL
3	107629938	107689084	107630502	107686008	TBC1D15
3	220860918	220909781	220888969	221079127	TBC1D22A
3	220951589	220956297	220888969	221079127	TBC1D22A
3	221067013	221110356	220888969	221079127	TBC1D22A
3	97041571	97055653	97018931	97049924	TGFBRAP1
3	187391578	187409164	187351085	187393251	TM7SF3
3	103125969	103128538	102960416	103141193	TMEM131
3	180120766	180152504	180088537	180140517	TMPRSS6
3	118574232	118779896	118397867	118835595	TMTC2
3	216655693	216701812	216688536	216692227	TNFRSF13C
3	133060664	133090792	133074092	133088046	TNS2
3	1297799	1959441	1738330	1745518	TPRN
3	525296	1184597	794870	805525	TRAF2
3	122215109	122218833	122215495	122215567	TRNAG-CCC
3	191778127	191782484	191778103	191778175	TRNAK-UUU
3	102000738	102009994	101947847	102036766	TSGA10
3	120958780	120981550	120938236	120970488	TSPAN19
3	8358867	8383604	8345744	8360465	TTC16
3	77042088	77043857	77041113	77156287	TTC7A
3	217673711	217808786	217736035	217753599	TTLL12
3	223548985	223612088	223542813	223565804	TUBGCP6
3	3274985	3348026	3314423	3340164	UBAC1
3	168910591	168921396	168907108	168994369	UHRF1BP1L
3	168929465	168933251	168907108	168994369	UHRF1BP1L
3	156874906	156906730	156829611	156958015	USP15
3	46586381	46667618	46483220	46665217	USP34
3	207627488	207652986	207640338	207647275	VAMP1
3	2148844	2153687	2045230	2190753	VAV2
3	96117992	96134600	96115950	96118785	WBP1
3	136880179	136894160	136877161	136881445	WNT1
3	136880179	136894160	136888219	136894451	WNT10B
3	220040195	220341455	220025118	220052477	WNT7B
3	181626876	181664798	181616571	181627477	YARS2
3	223222127	223329192	223243382	223245582	ZBED4
4	112955137	113038849	112978205	112993997	ABCB8
4	112955137	113038849	113031108	113088428	AGAP3
4	112955137	113038849	112996311	113001043	ASIC3
4	112955137	113038849	112967975	112975803	ATG9B
4	112055561	112124431	112058443	112066567	ATP6V0E2
4	92859248	92900524	92868917	92871683	ATP6V1F
4	72677057	73276375	72880869	72895751	C4H7orf62
4	77073288	77076221	77027448	77122127	CAMK2B
4	74463870	74562078	74433012	74502732	CFAP69
4	109967335	110007305	109410144	111067671	CNTNAP2
4	110716608	110737840	109410144	111067671	CNTNAP2
4	15362306	15365352	15302077	15485087	COL28A1
4	66999660	67007433	66961863	67098532	CPVL
4	32231494	32280565	32274609	32300481	DBF4
4	22852029	22879594	22424489	23306033	DGKB
4	22948042	23017657	22424489	23306033	DGKB
4	30579206	30590796	30313286	30665076	DNAH11
4	118009755	118016234	117987765	118011011	DNAJB6
4	56244999	56262472	56137557	56609533	DOCK4
4	116196045	116205858	115456833	116266516	DPP6
4	116253628	116298788	115456833	116266516	DPP6
4	61895708	61929370	61843126	61941302	DPY19L2
4	106186311	106216124	106197264	106204740	EPHA1
4	85936515	85940194	85859654	85985747	FAM3C
4	112955137	113038849	113021853	113026329	FASTK
4	92859248	92900524	92837629	92865592	FLNC
4	79085714	79098729	78782503	79093399	GLI3
4	40704620	41102151	40929586	41036557	GNAI1
4	31833825	31839491	31819033	31844979	GPNMB
4	91417181	91451714	90672338	91563424	GRM8
4	74463870	74562078	74525374	74552318	GTPBP10
4	38965334	38969381	38904285	38991849	HGF
4	68822152	68858115	68825561	68835506	HOXA10
4	68822152	68858115	68817583	68824465	HOXA11
4	68822152	68858115	68852896	68898107	HOXA3
4	68822152	68858115	68836590	68867690	HOXA9
4	31937926	31971755	31897319	32049061	IGF2BP3
4	57069542	57094606	56754837	57718366	IMMP2L
4	57675785	57702678	56754837	57718366	IMMP2L
4	92934736	92945803	92940494	92946963	IRF5
4	92859248	92900524	92883866	92913694	KCP
4	33398900	33405937	33183911	33502012	KIAA1324L
4	114012607	114034489	113952807	114138341	KMT2C
4	46193457	46232991	46197774	46291732	KMT2E
4	112055561	112124431	112089718	112095197	LRRC61
4	9389535	9397195	9379583	9399680	LRRD1
4	41925350	41996891	41759708	43273506	MAGI2
4	42357021	42376101	41759708	43273506	MAGI2
4	42654026	42673365	41759708	43273506	MAGI2
4	42776181	42795700	41759708	43273506	MAGI2
4	95040217	95063885	94824850	95204635	MKLN1
4	76517781	76565673	76554167	76568101	NACAD
4	112955137	113038849	112949235	112968096	NOS3
4	63738258	63749625	63722278	63765422	NT5C3A
4	31776689	31785297	31771513	31798652	NUPL2
4	31792717	31798439	31771513	31798652	NUPL2
4	116253628	116298788	116279156	116310785	PAXIP1
4	37670205	37709950	37400993	37770518	PCLO
4	12753506	12838797	12768544	12782313	PDK4
4	66232370	66251360	66190883	66261816	PLEKHA8
4	95821149	95850140	95759218	96252028	PLXNA4
4	112055561	112124431	112095470	112098480	RARRES2
4	36163716	36174540	36054263	36599906	SEMA3A
4	37017784	37034970	36930372	37203081	SEMA3E
4	32821643	32927072	32812260	32832272	SLC25A40
4	112955137	113038849	113009985	113021577	SLC4A2
4	92345748	92351587	91929818	92351267	SND1
4	111971702	112018699	111969697	112025215	SSPO
4	76517781	76565673	76542765	76552998	TBRG4
4	52274086	52311298	52200787	52430171	TFEC
4	112955137	113038849	113026917	113028931	TMUB1
4	74913222	74927873	74768189	74992182	TNS3
4	119058066	119060655	119000864	119064899	VIPR2
4	20428440	20444495	20382837	20480156	VWDE
4	118903997	118934519	118890643	118942953	WDR60
4	112055561	112124431	112089647	112092850	ZBED6CL
4	111765121	111777190	111775403	111807239	ZNF777
4	72677057	73276375	72852055	73433337	ZNF804B
4	112055561	112124431	112025161	112061235	ZNF862
4	106186311	106216124	106188211	106196392	ZYX
5	5482082	5580998	5512391	5518719	ABHD8
5	1836563	1859690	1689818	1948698	ADAMTS2
5	9023061	9066330	9023735	9043874	ADGRE2
5	9401831	9402847	9394600	9412367	ADGRE5
5	5482082	5580998	5521060	5526555	ANKLE1
5	5482082	5580998	5488106	5498524	ANO8
5	18868491	19008495	18912025	18945272	AP3D1
5	41167937	41203781	41185728	41202465	APC2
5	51216949	51236254	51060069	51599193	ARHGAP26
5	40808806	40869347	40785692	40818679	ARID3A
5	17563997	17601546	17582033	17621919	ATCAY
5	3397215	3416845	3402391	3417982	ATP13A1
5	40923450	41044494	41010238	41012378	ATP5D
5	5482082	5580998	5526703	5532570	BABAM1
5	40489106	40536149	40527297	40534206	BSG
5	15374970	15410405	15367670	15401347	C3
5	40923450	41044494	41040600	41044574	C5H19orf24
5	6184974	6200658	6199697	6218883	C5H19orf44
5	9807842	9857756	9828447	9848879	C5H19orf57
5	16140534	16167864	16162697	16164437	C5H19orf70
5	17808119	17891515	17875536	17880649	C5H19orf71
5	17808119	17891515	17811928	17823439	CACTIN
5	59010469	59017863	59003611	59069180	CAMK2A
5	43520447	43589412	43536979	43544781	CAMLG
5	14070968	14081415	14060855	14076983	CAMSAP3
5	40923450	41044494	40999336	41009404	CBARP
5	9807842	9857756	9811438	9828443	CC2D1A
5	40489106	40536149	40498557	40504342	CDC34
5	4052617	4060199	4055810	4066295	CERS1
5	87212425	87223304	87209051	87228546	CETN3
5	17212543	17229233	17192732	17217468	CHAF1A
5	95292782	95337815	95292016	95363422	CHD1
5	6184974	6200658	6174259	6199488	CHERP
5	40923450	41044494	41035750	41040788	CIRBP
5	40808806	40869347	40861661	40869499	CNN2
5	15554496	15569332	15560275	15562573	CRB3
5	14260294	14308618	14298165	14298962	CTXN1
5	48174000	48183820	48163677	48195764	CXXC5
5	41167937	41203781	41155574	41171780	DAZAP1
5	5482082	5580998	5500709	5508373	DDA1
5	43520447	43589412	43553130	43601503	DDX46
5	15554496	15569332	15549688	15559564	DENND1C
5	10837231	10884946	10843135	10846878	DHPS
5	32090481	32209342	32076336	32207850	DMXL1
5	18868491	19008495	18840146	18886147	DOT1L
5	16070158	16095975	16079625	16093690	DUS3L
5	17331658	17333917	17328647	17335059	EBI3
5	4400098	4456069	4439400	4463976	ELL
5	7627122	7645446	7630987	7640646	EPHX3
5	13379900	13386345	13382176	13387884	EPOR
5	90570511	90601566	90368215	90763314	FAM172A
5	47067312	47089558	47058615	47067927	FAM53C
5	22990770	22994974	22980679	23208590	FBN2
5	14447661	14462434	14397671	14467101	FBN3
5	10837231	10884946	10832690	10838732	FBXW9
5	12462011	12480928	12472252	12476507	FDX1L
5	105307921	105313290	104957565	105407389	FER
5	274993	277796	273354	300541	FLT4
5	20295565	20300526	20242000	20317738	FNIP1
5	40591682	40609264	40602556	40608933	FSTL3
5	17808119	17891515	17881980	17894917	FZR1
5	63089213	63095921	63035454	63161815	GALNT10
5	17808119	17891515	17838864	17847064	GIPC3
5	18185476	18215039	18189567	18205192	GNA11
5	35507858	35511576	35508085	35519153	GPRIN1
5	40808806	40869347	40835716	40844833	GRIN3B
5	15620099	15625251	15620447	15626670	GTF2F1
5	5482082	5580998	5481260	5485392	GTPBP3
5	40489106	40536149	40504345	40513022	GZMM
5	65788209	65796373	65773253	65810883	HAVCR1
5	17808119	17891515	17849515	17856223	HMG20B
5	16140534	16167864	16157880	16162678	HSD11B1L
5	12462011	12480928	12457839	12465191	ICAM5
5	4465458	4479370	4467544	4470102	ISYNA1
5	18868491	19008495	18946709	18949957	IZUMO4
5	10757411	10771312	10764778	10766382	JUNB
5	16620970	16759885	16625412	16726915	KDM4B
5	54779199	54790950	54734150	54801170	LARS
5	18648500	18695952	18650152	18654908	LMNB2
5	16140534	16167864	16135810	16154564	LONP1
5	14260294	14308618	14269767	14278464	LRRC8E
5	10837231	10884946	10865128	10880530	MAN2B1
5	47920475	47934476	47901412	47940268	MATR3
5	41261569	41315913	41282941	41291578	MBD3
5	41261569	41315913	41269747	41277854	MEX3D
5	17808119	17891515	17865893	17875384	MFSD12
5	40923450	41044494	41016843	41023063	MIDN
5	18868491	19008495	18987255	18996815	MKNK2
5	18868491	19008495	18950114	18983862	MOB3A
5	5482082	5580998	5509329	5510815	MRPL34
5	5377411	5379705	5377159	5419156	MVB12A
5	5482082	5580998	5573794	5682406	MYO9B
5	36648894	36649956	36646386	36655257	N4BP3
5	9807842	9857756	9851607	9855954	NANOS3
5	17944399	17947656	17943743	17994634	NFIC
5	10578271	10592152	10512776	10581163	NFIX
5	17563997	17601546	17569149	17573600	NMRK2
5	5482082	5580998	5550794	5561342	NR2F6
5	5981379	6000575	5931600	6019096	NWD1
5	2332061	2410487	2347972	2571965	OBSCN
5	2479531	2491960	2347972	2571965	OBSCN
5	5482082	5580998	5563385	5565499	OCEL1
5	19649084	19657390	19643044	19713816	P4HA2
5	19649084	19657390	19644485	19663035	PDLIM4
5	48780994	48795295	48750633	48822404	PFDN1
5	4754604	4761957	4749544	4759666	PIK3R2
5	17808119	17891515	17761718	17810172	PIP5K1C
5	18868491	19008495	18887995	18890266	PLEKHJ1
5	9807842	9857756	9804189	9809276	PODNL1
5	47983120	47985297	47981314	47985891	PROB1
5	16070158	16095975	16093636	16095843	PRR22
5	14260294	14308618	14262796	14265775	PRR36
5	40591682	40609264	40609078	40616239	PRSS57
5	16390213	16562588	16496469	16568842	PTPRS
5	15966427	15977617	15958729	16008408	RANBP3
5	779001	817702	762155	812798	RASGEF1C
5	12462011	12480928	12476661	12490631	RAVER1
5	93856723	93859558	93852569	93873311	RIOK2
5	40591682	40609264	40585937	40596228	RNF126
5	35438906	35442142	35438273	35449715	RNF44
5	16140534	16167864	16154674	16156005	RPL36
5	41167937	41203781	41175748	41176115	RPS15
5	43453216	43460341	43424903	43453825	SAR1B
5	40923450	41044494	40919862	40962598	SBNO2
5	43520447	43589412	43461065	43532062	SEC24A
5	18868491	19008495	18890316	18898914	SF3A2
5	64495459	64579630	64506342	65436963	SGCD
5	64891970	64954620	64506342	65436963	SGCD
5	41737710	41745209	41734759	41744866	SHROOM1
5	5874844	5891196	5876832	5917743	SIN3B
5	15554496	15569332	15565386	15578736	SLC25A23
5	12746906	12759400	12742163	12757974	SLC44A2
5	14260294	14308618	14294052	14296367	SNAPC2
5	47983120	47985297	47979523	47991508	SPATA24
5	92282184	92289794	92250821	92307176	SPATA9
5	78657242	78759247	78639712	78921759	SSBP2
5	4465458	4479370	4470698	4485301	SSBP4
5	40923450	41044494	40982180	40999019	STK11
5	3949444	3985441	3927047	3956219	SUGP2
5	13379900	13386345	13380052	13382019	SWSAP1
5	17808119	17891515	17827941	17838730	TBXA2R
5	41261569	41315913	41304251	41336453	TCF3
5	14260294	14308618	14289651	14292761	TGFBR3L
5	65627042	65649126	65646132	65680616	TIMD4
5	14260294	14308618	14299590	14313111	TIMM44
5	106596584	106616135	106576532	106849669	TMEM232
5	40808806	40869347	40844880	40856922	TMEM259
5	18648500	18695952	18667141	18698109	TMPRSS9
5	40489106	40536149	40487027	40493748	TPGS1
5	12523703	12533821	12506117	12535993	TYK2
5	16620970	16759885	16747200	16781572	UHRF1
5	35719657	35766893	35711850	35776749	UNC5A
5	5482082	5580998	5569057	5572887	USE1
5	5482082	5580998	5537480	5546569	USHBP1
5	40808806	40869347	40828742	40833851	WDR18
5	10837231	10884946	10846764	10850914	WDR83
5	10837231	10884946	10851039	10863942	WDR83OS
5	14070968	14081415	14078175	14086926	XAB2
5	80281523	80294167	80170727	80460327	XRCC4
5	17675158	17678779	17659035	17679628	ZFR2
5	12462011	12480928	12468676	12471792	ZGLP1
5	37194206	37199947	37197979	37224052	ZNF354A
5	26462477	26463815	26439590	26543490	ZNF608
6	113579312	113926543	113576044	113721510	ABLIM2
6	76744563	76762355	76563989	77502551	ADGRL3
6	76894463	76932913	76563989	77502551	ADGRL3
6	76979715	77041139	76563989	77502551	ADGRL3
6	77092153	77158775	76563989	77502551	ADGRL3
6	12491747	12511438	12314476	13018734	ANK2
6	94186128	94193317	94116861	94297851	ANTXR2
6	179036	322657	290050	314042	APELA
6	66050365	66106140	66025053	66155190	ATP10D
6	110336622	110392610	110325067	110345003	BST1
6	25174608	25197616	25111906	25212277	C6H4orf17
6	12027041	12032508	11870774	12192040	CAMK2D
6	12105138	12114825	11870774	12192040	CAMK2D
6	32898707	33012304	32953705	34428908	CCSER1
6	33345059	33647667	32953705	34428908	CCSER1
6	33815846	34105112	32953705	34428908	CCSER1
6	34127992	34194944	32953705	34428908	CCSER1
6	34262278	34290040	32953705	34428908	CCSER1
6	21728872	21797469	21713052	21791689	CENPE
6	71313015	71346775	71298217	71368289	CEP135
6	16288242	16302935	16061452	16578068	COL25A1
6	116321582	116541523	116495489	116536815	CPLX1
6	85092762	85144219	85097149	85113820	CSN1S2
6	116321582	116541523	116400689	116409635	DGKQ
6	114653254	114772266	114722579	114726837	DOK7
6	80738288	80791732	80629738	81042818	EPHA5
6	80854304	80954098	80629738	81042818	EPHA5
6	80962528	81036412	80629738	81042818	EPHA5
6	58010604	58021531	57987718	58059143	FAM114A1
6	115206539	115318922	115294311	115352570	FAM193A
6	115953862	116056473	115991934	116002382	FGFR3
6	116321582	116541523	116344461	116349501	FGFRL1
6	64390441	64687928	64467396	64555046	GABRG1
6	116321582	116541523	116430796	116480641	GAK
6	86531748	86545873	86526242	86569541	GC
6	18919207	18954148	18937347	18951586	GIMD1
6	30934302	31019656	30703853	32342398	GRID2
6	31260462	31282260	30703853	32342398	GRID2
6	31751958	32311262	30703853	32342398	GRID2
6	61587951	61624560	61570508	61703510	GRXCR1
6	17217031	17316361	17276139	17319948	HADH
6	36216032	36228141	36181502	36236259	HERC6
6	114653254	114772266	114702395	114708639	HGFAC
6	114178432	114321136	114318745	114326535	HMX1
6	105964715	105976500	105963206	105998950	HS3ST1
6	113579312	113926543	113885203	113901557	HTRA3
6	114803668	114959462	114902414	115022649	HTT	end_range=115022649,.
6	116321582	116541523	116373564	116388550	IDUA
6	85586565	85589544	85578326	85588203	JCHAIN
6	40174862	40190270	40081833	41393754	KCNIP4
6	40457295	40533486	40081833	41393754	KCNIP4
6	40654578	41598767	40081833	41393754	KCNIP4
6	17217031	17316361	17147295	17268176	LEF1
6	115953862	116056473	115964697	115988062	LETM1
6	114653254	114772266	114648998	114661096	LRPAP1
6	116586819	116684075	116660612	116667998	MAEA
6	100368424	100456331	100342351	100753325	MAPK10
6	34640206	34684945	34599682	34705043	MMRN1
6	92165230	92213659	92118631	92189342	MRPL1
6	114803668	114959462	114885867	114891676	MSANTD1
6	59001103	59059514	58983911	59057805	N4BP2
6	2848296	2876738	2837338	2871747	NAF1
6	10600245	10603933	10552473	10875691	NDST4
6	66623359	66629699	66607642	66631805	NIPAL1
6	70937651	70985544	70961545	70984718	NMU
6	67387253	67394629	67371830	67395802	OCIAD1
6	49883017	49897263	49767878	50239327	PCDH7
6	70937651	70985544	70915815	70957586	PDCL2
6	58852709	58872009	58786702	58908657	PDS5A
6	44611760	44624685	44588806	44624774	PI4K2B
6	116817676	116838627	116825182	116865746	PIGG
6	115770915	115788741	115643941	115806190	POLN
6	4601375	5439243	4567039	4931216	PRDM5
6	85092762	85144219	85114944	85130427	PRR27
6	26022301	26083410	25998007	26153413	RAP1GDS1
6	58346304	58353543	58338502	58411731	RFC1
6	58390445	58398139	58338502	58411731	RFC1
6	114803668	114959462	114794688	114842245	RGS12
6	68640257	68646936	68421234	68814471	SCFD2
6	115206539	115318922	115207264	115224512	SH3BP2
6	113579312	113926543	113788889	113838721	SH3TC1
6	44104761	44119441	44104939	44190755	SOD3
6	113230139	113238301	113037829	113393958	SORCS2
6	19040499	19115489	18987075	19195094	TBCK
6	78318499	79954805	79583112	79717598	TECRL
6	89931123	89933372	89932813	89948008	THAP6
6	115953862	116056473	116052794	116058967	TMEM129
6	116321582	116541523	116410215	116417338	TMEM175
6	84572016	84756814	84701793	84757230	UGT2A1
6	6186272	6187328	6185904	6241821	USP53
6	116586819	116684075	116627711	116649297	UVSSA
6	104773703	104790773	104753699	104777219	WDR1
6	58346304	58353543	58255697	58347709	WDR19
7	11630601	11645851	11606980	11655991	ANKDD1A
7	6416040	6421813	6313319	6450915	ANKRD31
7	32895083	32905756	32898696	32901043	ANKRD63
7	8993338	9063003	8920962	9161107	AP3B1
7	9085261	9091884	8920962	9161107	AP3B1
7	4467791	4517053	4461486	4534745	AP3S1
7	56368432	56369905	56360227	56430588	AP4E1
7	66461845	66630791	66533040	66556876	AP5M1
7	27048148	27055352	27045938	27068532	ARHGAP11A
7	54771216	54814721	54763558	54784245	ARPP19
7	40563972	40602541	40495292	40583237	ATL1
7	69478285	69552889	69502230	69553842	C7H14orf39
7	20139977	20160310	20156583	20169758	C7H15orf59
7	14795789	14817550	14799858	14814412	CALML4
7	20351289	20369809	20352498	20358597	CBLN3
7	68691599	68711662	68643147	68725307	CCDC175
7	89077912	89096403	88718313	89175760	CEP128
7	10426531	10507410	10425659	10526621	CMYA5
7	12406840	12455929	12340676	12450311	DENND4A
7	81244342	81259594	80976950	81261438	DPF3
7	57612594	57751569	57612456	57652122	DTWD1
7	82020301	82038018	81998311	82039533	ELMSAN1
7	84666226	84669285	84662681	84715834	ESRRB
7	66461845	66630791	66476503	66532909	EXOC5
7	57612594	57751569	57652046	57867901	FAM227B
7	32416905	32419193	32241004	32452755	FSIP1
7	74378331	74532056	74367886	74682108	FUT8
7	20529907	20558270	20541299	20547858	GMPR2
7	75505098	75566855	75393686	75938903	GPHN
7	19779375	19801770	19752675	19797490	HCN4
7	10198629	10257880	10147308	10290337	HOMER1
7	85126177	85148075	85141863	85144823	IRF2BPL
7	85560824	85565181	85561093	85568411	ISM2
7	34228132	34301202	34233058	34239483	JMJD7
7	71991379	72066864	71820859	72210577	KCNH5
7	2934303	2942724	2654990	3170865	KCNN2
7	20351289	20369809	20343908	20360854	KHNYN
7	67562755	67681970	67564238	67707295	KIAA0586
7	34228132	34301202	34179142	34232838	MAPKBP1
7	149266	289371	173161	702324	MCC
7	36985925	37077609	36950772	37880755	MDGA2
7	37571179	37590510	36950772	37880755	MDGA2
7	20529907	20558270	20556626	20560782	MDP1
7	12495285	12570910	12544761	12859526	MEGF11
7	34174459	34176731	34024918	34177571	MGA
7	69863323	69904464	69775370	69995638	MNAT1
7	50832790	51121174	50832833	50925308	MNS1
7	21579297	21599038	21594947	21599348	MRPL52
7	47942312	47957389	47941771	48157982	MYO1E
7	54771216	54814721	54793862	54991732	MYO5A
7	18581199	18684934	18461527	18656136	MYO9A
7	20529907	20558270	20548130	20556484	NEDD8
7	19643877	19658638	19504096	19737382	NEO1
7	19820901	20039987	19980165	20046177	NPTN
7	98649042	98704909	98697434	98741060	NRDE2
7	86420977	86453957	86267141	88044716	NRXN3
7	25254773	25255964	25253307	25265045	NUTM1
7	20351289	20369809	20364373	20384494	NYNRIN
7	32895083	32905756	32870187	32895425	PAK6
7	14795789	14817550	14668904	14797535	PIAS1
7	34228132	34301202	34239422	34250865	PLA2G4B
7	76277795	76287304	76245075	76302197	PLEKHH1
7	42305640	42311613	42304703	42326025	PLEKHO2
7	98649042	98704909	98687544	98696003	PSMC1
7	82134142	82140612	82120699	82141710	PTGR2
7	12495285	12570910	12516228	12536111	RAB11A
7	19820901	20039987	19870858	19980172	REC114
7	48201457	48261808	48202076	48286571	RNF111
7	33160731	33178339	33166501	33171511	RPUSD2
7	40563972	40602541	40584625	40612837	SAV1
7	79893463	79908536	79756228	80135262	SIPA1L1
7	99774822	99780493	99728353	99803027	SPG11
7	33385293	33390246	33377560	33389598	SPINT1
7	34228132	34301202	34249750	34299892	SPTBN5
7	35021557	35024139	34925630	35040492	STARD9
7	50261963	50305528	49970044	50354553	TCF12
7	50832790	51121174	50925407	51022257	TEX9
7	20529907	20558270	20538158	20544014	TINF2
7	23641591	23646691	23645214	23645295	TRNAL-AAG
7	23641591	23646691	23646196	23646267	TRNAP-AGG
7	52886690	52906436	52604880	53308399	UNC13C
7	2136510	2174884	2135360	2207355	YTHDC2
7	8053341	8067101	8041658	8059851	ZBED3
7	21010619	21028682	21001785	21032003	ZFHX2
7	50591861	50615933	50583804	50711863	ZNF280D
8	30482627	30498628	30435885	30666666	AIM1
8	74945465	74949685	74872965	74973576	AKAP12
8	36154066	36177856	36127435	36469801	ASCC3
8	7184955	7192517	6983555	7253622	BCKDHB
8	30020665	30029041	29991710	30021559	BEND3
8	37316561	37361895	37304519	37330415	CCNC
8	43788808	43810974	43790143	44003862	EPHA7
8	90078086	90158078	90049987	90083328	ERMARD
8	75547645	75553628	75364025	75648724	ESR1
8	58459725	58472170	58337999	58703270	EYA4
8	2217707	2432933	2013414	2324549	FILIP1
8	82119497	82121571	82048250	82163145	FNDC1
8	21589187	21617665	21610269	21710210	FRK
8	88960872	89008927	88981132	88987111	FRMD1
8	88482005	88489444	88480565	88484643	GPR31
8	20837234	20846630	20837781	20861405	GPRC6A
8	34909106	35094997	34905375	35643157	GRIK2
8	35211380	35235465	34905375	35643157	GRIK2
8	35283126	35295554	34905375	35643157	GRIK2
8	4205880	4232031	4216020	4220357	HTR1B
8	9156595	9208333	9150906	9251792	IBTK
8	82845207	82885054	82792178	82878871	IGF2R
8	26237718	26244125	26231559	26243044	KIAA1919
8	88960872	89008927	88941651	88969372	KIF25
8	28747222	28790070	28724170	28920312	LACE1
8	54638970	54668247	54315641	54842723	LAMA2
8	54713005	54735835	54315641	54842723	LAMA2
8	41019390	41445340	41316130	41402495	MANEA
8	36990400	36992296	36976140	37002136	MCHR2
8	4561848	4578699	4465933	4704871	MEI4
8	57394030	57506586	57373565	57445060	MOXD1
8	76438749	76448004	76438546	76451059	MTRF1L
8	13819529	13869716	13430820	14619320	NKAIN2
8	14141587	14172708	13430820	14619320	NKAIN2
8	78529596	78560060	78559196	78625989	NOX3
8	21493976	21500050	21463003	21579615	NT5DC1
8	85098381	85148992	84770637	85311244	PACRG
8	84435525	84453311	83560850	84770428	PARK2
8	84564311	84580757	83560850	84770428	PARK2
8	84616444	84632645	83560850	84770428	PARK2
8	73551951	73564957	73529301	73567106	PPIL4
8	31686698	31690025	31584381	31778139	PREP
8	31710719	31717143	31584381	31778139	PREP
8	53365644	53424446	53174896	53650434	PTPRK
8	20837234	20846630	20752594	20879432	RFX6
8	48251005	48391064	48205312	48432066	RNGTT
8	11198050	11214020	11192813	11287467	RSPO3
8	72254620	72284337	71627931	72658989	SASH1
8	2217707	2432933	2325109	2462063	SENP6
8	15802999	15805928	15771886	15806596	SERINC1
8	26856012	26858157	26832079	26865645	SLC22A16
8	89263294	89304902	89209155	89322277	SMOC2
8	16830758	17046192	16859886	17055296	TBC1D32
8	52877393	52944373	52878537	53083904	THEMIS
8	52963371	52965723	52878537	53083904	THEMIS
8	68456183	68463435	68461328	68461410	TRNAL-UAA
8	37316561	37361895	37332949	37338729	TSTD3
8	88534292	88537266	88536679	88573219	UNC93A
8	88566350	88616316	88536679	88573219	UNC93A
8	37316561	37361895	37341679	37396422	USP45
9	13307586	13645241	13455625	13469059	ADCK5
9	14576162	14581819	14579211	14649614	ADGRB1
9	5477473	5570087	5161237	6053372	ADGRB3
9	15920249	15925137	15905853	15945325	AGO2
9	44060675	44088780	44003935	44122743	ARFGEF1
9	13307586	13645241	13259143	13311678	ARHGAP39
9	34582026	34601586	34580499	34627042	ATP6V1H
9	13307586	13645241	13530910	13549472	BOP1
9	13191404	13195821	13194854	13197098	C9H8orf33
9	88055601	88062315	87751385	88275297	CNBD1
9	88210947	88272921	87751385	88275297	CNBD1
9	4218721	4258880	4020827	4496190	COL19A1
9	16991472	17010366	16903240	17128643	COL22A1
9	17022630	17028775	16903240	17128643	COL22A1
9	44308045	44314123	44200289	44514690	CPA6
9	13307586	13645241	13439844	13455633	CPSF1
9	63516346	63558008	63485512	64889567	CSMD3
9	63600162	63720945	63485512	64889567	CSMD3
9	63838009	63935478	63485512	64889567	CSMD3
9	64120141	64253001	63485512	64889567	CSMD3
9	64661718	64901790	63485512	64889567	CSMD3
9	73626809	73724197	73623364	73639399	CTHRC1
9	13307586	13645241	13372092	13385450	CYHR1
9	68419433	68562614	68497667	68534998	EMC2
9	13819537	13922173	13818781	13827496	EPPK1
9	47679462	47897023	47469443	47846059	EYA1
9	13819537	13922173	13896799	13909692	FAM83H
9	28845643	28850948	28847283	28884880	FAM91A1
9	73626809	73724197	73677528	73714621	FZD6
9	13963855	14203814	14199259	14211114	GLI4
9	13307586	13645241	13637542	13641856	GPAA1
9	15393049	15431206	15421205	15423842	GPR20
9	13963855	14203814	14015559	14024000	GSDMD
9	13307586	13645241	13512605	13530933	HSF1
9	16478816	16493218	16422498	16527242	KCNK9
9	13307586	13645241	13364314	13371538	KIFC2
9	4764461	4787500	4646798	4792379	LMBRD1
9	13307586	13645241	13315263	13319732	LRRC24
9	13819537	13922173	13913444	13917782	MAPK15
9	86970447	86978608	86861843	87249027	MMP16
9	13307586	13645241	13549549	13569008	MROH1
9	13963855	14203814	14006692	14011559	MROH6
9	34328518	34333689	34330412	34339214	NPBWR1
9	70452297	70460321	70384059	70832044	OXR1
9	21420572	21441906	21375172	21450716	PHF20L1
9	67419429	67424318	67413550	67588999	PKHD1L1
9	32239673	32247066	32162819	32293650	PRKDC
9	13819537	13922173	13842892	13855713	PUF60
9	13963855	14203814	13976772	13984337	PYCRL
9	13307586	13645241	13323949	13330540	RECQL4
9	13963855	14203814	14134652	14145162	RHPN1
9	1673057	1683610	1586455	2085504	RIMS1
9	1867131	1879017	1586455	2085504	RIMS1
9	86384131	86402173	86381711	86416125	RIPK2
9	49143549	49152821	49143657	49176177	SBSPON
9	13819537	13922173	13856597	13877499	SCRIB
9	13307586	13645241	13493187	13496610	SCRT1
9	13307586	13645241	13620872	13624701	SHARPIN
9	85658008	85676363	85551322	85776463	SLC26A7
9	13307586	13645241	13414226	13431635	SLC39A4
9	15454500	15526023	15459151	15527205	SLC45A4
9	94379417	94415635	94199285	94446226	SNTB1
9	49681159	49716170	49463976	49773266	STAU2
9	78160079	78164184	77980268	78255639	STK3
9	13307586	13645241	13387324	13400115	TONSL
9	37882284	37904239	37666865	37976100	TOX
9	16315241	16381360	15989167	16395458	TRAPPC9
9	83876010	83909541	83796108	83898599	TRIQK
9	14746111	14892367	14725108	14764284	TSNARE1
9	13963855	14203814	13969580	13974303	TSTA3
9	77257053	77433981	76934510	77745994	VPS13B
9	77629646	77650020	76934510	77745994	VPS13B
9	13307586	13645241	13400249	13405660	VPS28
9	35453155	35471481	35381274	35688058	XKR4
9	13963855	14203814	14027941	14091271	ZC3H3
9	52583513	52589979	52537336	52752177	ZFHX4
9	13963855	14203814	14183332	14188175	ZNF696
10	85645180	86091637	85906887	85913758	ADPRHL1
10	84619718	84643297	84608955	84640830	ANKRD10
10	85645180	86091637	85606341	85658579	ATP11A
10	84516153	84534922	84511179	84520866	CARKD
10	84516153	84534922	84525217	84543986	CARS2
10	16483327	16487353	16483871	16542806	CPB2
10	85645180	86091637	85807016	85832449	CUL4A
10	46435906	46525960	46495478	46959631	DACH1
10	46589902	46612713	46495478	46959631	DACH1
10	25711982	25717165	25548429	25896466	DCLK1
10	21515911	21534751	21501699	21543931	DHRS12
10	85645180	86091637	85765144	85780320	F10
10	85645180	86091637	85758112	85765036	F7
10	82346855	82366058	82096383	82706669	FAM155A
10	74464907	74470340	74422888	74729144	FARP1
10	19114193	19133583	19028260	19143810	FNDC3A
10	85645180	86091637	86067956	86090008	GAS6
10	66814011	66837346	66198751	67793170	GPC5
10	66970058	67007899	66198751	67793170	GPC5
10	85645180	86091637	85864568	85883925	GRTP1
10	41967211	44397422	44372905	44916819	KLHL1
10	44487711	44523269	44372905	44916819	KLHL1
10	44540739	44582410	44372905	44916819	KLHL1
10	44718310	44786468	44372905	44916819	KLHL1
10	85645180	86091637	85849875	85864424	LAMP1
10	16643966	16647262	16552317	16647901	LCP1
10	32610915	32621717	32565381	32611397	LNX2
10	85645180	86091637	85715906	85754310	MCF2L
10	78199324	78262992	78200814	78213584	METTL21C
10	31258565	31264085	31211953	31595513	MTUS2
10	26628819	26636348	25979718	26654048	NBEA
10	5467141	5509476	5418991	5531436	PCDH17
10	38572028	39856209	39634124	40811761	PCDH9
10	40006115	40104044	39634124	40811761	PCDH9
10	40224759	40258593	39634124	40811761	PCDH9
10	40482492	40508176	39634124	40811761	PCDH9
10	85645180	86091637	85792799	85807074	PCID2
10	47949813	47954231	47946975	48174554	PIBF1
10	48134887	48141335	47946975	48174554	PIBF1
10	85645180	86091637	85782552	85790049	PROZ
10	53186971	53192558	53105195	53233117	SCEL
10	19333362	19351451	19317590	19356297	SETDB2
10	62568944	62784020	62721845	62736253	SLITRK5
10	27909537	27926619	27750577	28253930	STARD13
10	50808529	50810916	50732058	50946254	TBC1D4
10	1938659	1956859	1823056	2053381	TDRD3
10	85645180	86091637	85975965	85989158	TFDP1
10	85645180	86091637	85941527	85962758	TMCO3
11	50648499	50737967	50646039	50667974	AATK
11	26624688	26632853	26629403	26641632	ACAP1
11	44175541	44203961	44174847	44184828	ACBD4
11	50317345	50483195	50367675	50370580	ACTG1
11	33820258	34006092	33920967	33940327	ALKBH5
11	30856040	30890024	30810274	30862618	ARHGAP44
11	60616972	60626765	60604781	60660567	ARSG
11	17666395	17684617	17655974	17690519	ATAD5
11	24115394	24180030	24122676	24148536	ATP2A3
11	61033949	61053621	61039591	61066062	AXIN2
11	49101345	49132909	48996402	49103586	B3GNTL1
11	50317345	50483195	50410899	50465755	BAHCC1
11	50648499	50737967	50670174	50727238	BAIAP2
11	26396682	26412901	26398439	26404455	BCL6B
11	10825709	10877327	10758460	10943368	BRIP1
11	10909829	10919152	10758460	10943368	BRIP1
11	8774859	8826521	8803486	8827834	BZRAP1
11	50577426	50639686	50586817	50588877	C11H17orf89
11	52936057	52941602	52927140	52938675	C11H17orf99
11	203498	443273	268451	1109337	CA10
11	625478	825203	268451	1109337	CA10
11	12353440	12368977	12352618	12360060	CA4
11	35589652	35600391	35587282	35650352	CACNA1G
11	39186676	39200273	39199174	39217129	CACNB1
11	61698995	61816452	61800691	61806588	CACNG5
11	37180164	37182386	37179738	37202731	CALCOCO2
11	24088307	24090231	24064297	24092257	CAMKK1
11	39977309	39982249	39961388	39983911	CASC3
11	54964865	54973679	54973536	54985792	CASKIN2
11	54984928	55002034	54973536	54985792	CASKIN2
11	51675204	51699966	51695874	51706184	CBX2
11	51675204	51699966	51686922	51690184	CBX8
11	8080548	8117925	8096792	8097696	CCDC182
11	43792314	43793562	43791934	43801276	CCDC43
11	40075988	40119901	40065420	40076488	CDC6
11	55364622	55380035	55366136	55378094	CDR2L
11	50577426	50639686	50606242	50622760	CEP131
11	35953560	35961895	35945920	35962445	COL1A1
11	39857149	39859677	39856877	39860563	CSF3
11	26546570	26556158	26547266	26553932	CTDNEP1
11	8150172	8229259	8202803	8224558	CUEDC1
11	44088016	44095573	44089746	44117345	DCAKD
11	22043997	22069215	22064962	22079518	DOC2B
11	22642853	22674028	22631005	22645093	DPH1
11	34046535	34053231	34036729	34056375	DRC3
11	33820258	34006092	33997062	34005830	DRG2
11	49893009	49954353	49921451	49928121	DUS1L
11	46156344	46179585	46162811	46226713	EFCAB3
11	26804947	26829083	26825396	26831123	EIF4A1
11	30856040	30890024	30862659	30880061	ELAC2
11	26546570	26556158	26553012	26560527	ELP5
11	52250944	52277364	52269639	52283826	ENGASE
11	50577426	50639686	50588696	50597859	ENTHD2
11	39593720	39597538	39597222	39615609	ERBB2
11	54570562	54588863	54574626	54592616	EVPL
11	50317345	50483195	50333179	50342974	FAAP100
11	50159892	50198984	50160690	50168351	FAM195B
11	33698625	33774160	33757584	33763992	FAM83G
11	49893009	49954353	49888074	49905801	FASN
11	26704231	26711993	26706192	26712761	FGF11
11	41404096	41438368	41437393	41445277	FKBP10
11	33820258	34006092	33888357	33900200	FLII
11	44224606	44245284	44235754	44261146	FMNL1
11	50317345	50483195	50343123	50350670	FSCN2
11	26546570	26556158	26544193	26546715	GABARAP
11	50159892	50198984	50173568	50179937	GCGR
11	55176922	55186471	55171250	55185209	GGA3
11	12448756	12461607	12440959	12472740	GGNBP2
11	20415031	20439302	20421623	20430095	GIT1
11	26135649	26151257	26151052	26152529	GLTPD2
11	49893009	49954353	49928429	49933339	GPS1
11	33698625	33774160	33698265	33724898	GRAP
11	41369580	41371234	41365627	41376261	HAP1
11	44175541	44203961	44187424	44190942	HEXIM1
11	44175541	44203961	44196867	44202957	HEXIM2
11	22642853	22674028	22655266	22668102	HIC1
11	55231136	55260020	55241731	55255126	HN1
11	47572382	47608064	47573825	47592397	ICAM2
11	41404096	41438368	41392501	41422145	JUP
11	34724348	34847823	34814403	34848134	KCNJ12
11	55973612	55980682	55968280	55995152	KIF19
11	18775960	18850483	18638709	18803245	KSR1
11	38989620	39006672	38983420	39025644	LASP1
11	33820258	34006092	33900170	33914921	LLGL1
11	54878189	54934397	54930775	54959433	LLGL2
11	8774859	8826521	8745903	8775927	LPO
11	38121870	38141995	38130392	38137625	LRRC46
11	50035206	50106951	50079945	50085475	MAFG
11	34724348	34847823	34745805	34764408	MAP2K3
11	48959851	48975575	48957013	48973730	METRNL
11	53865002	53871136	53846770	53914219	MGAT5B
11	33820258	34006092	33883584	33888291	MIEF2
11	22945059	22959933	22940478	22953893	MNT
11	8774859	8826521	8777277	8787874	MPO
11	34447213	34537751	34446061	34517178	MPRIP
11	38121870	38141995	38135340	38141391	MRPL10
11	54673260	54697429	54671705	54676076	MRPL38
11	8150172	8229259	8186904	8192273	MRPS23
11	7914029	7921824	7631370	8035845	MSI2
11	50035206	50106951	50064928	50069087	MYADML2
11	33820258	34006092	33945761	33993348	MYO15A
11	12407487	12409890	12398386	12431499	MYO19
11	34724348	34847823	34717055	34726024	NATD1
11	26624688	26632853	26613059	26624881	NEURL4
11	18431881	18444693	18210698	18465125	NF1
11	37927291	37936350	37924547	37935246	NFE2L1
11	50035206	50106951	50049359	50055727	NOTUM
11	38380935	38420653	38333656	38457858	NPEPPS
11	50317345	50483195	50278451	50330609	NPLOC4
11	55231136	55260020	55258521	55260197	NT5C
11	55176922	55186471	55185869	55211860	NUP85
11	22642853	22674028	22645026	22646430	OVCA2
11	23947056	23957547	23938244	23953620	P2RX5
11	41404096	41438368	41429533	41436229	P3H4
11	5773632	5805877	5774689	5803850	PCTP
11	50035206	50106951	50095438	50102481	PCYT2
11	32837748	32846882	32800058	32843735	PIGL
11	24991458	24993872	24919256	24993483	PITPNM3
11	9253327	9456565	9454148	9480884	PPM1E
11	39518934	39536757	39527120	39535136	PPP1R1B
11	61602274	61612239	61479631	61759173	PRKCA
11	61698995	61816452	61479631	61759173	PRKCA
11	26135649	26151257	26144867	26147119	PSMB6
11	50035206	50106951	50071622	50076355	PYCR1
11	18106192	18118627	18094538	18151678	RAB11FIP4
11	34133177	34160536	34150127	34177216	RAI1
11	34176328	34185774	34150127	34177216	RAI1
11	40075988	40119901	40102035	40123460	RARA
11	54878189	54934397	54858364	54887901	RECQL5
11	14589965	14602776	14558485	14632620	RFFL
11	49893009	49954353	49933860	49937340	RFNG
11	54209735	54235079	54193769	54217664	RHBDF2
11	22322250	22335455	22333417	22336716	RILP
11	33570026	33585658	33569175	33576832	RNF112
11	22322250	22335455	22320517	22332148	SCARF1
11	47518823	47550376	47509117	47610238	SCN4A
11	47572382	47608064	47509117	47610238	SCN4A
11	38121870	38141995	38126219	38130254	SCRN2
11	19439453	19440563	19439129	19441958	SEBOX
11	26804947	26829083	26815253	26824476	SENP3
11	53475154	53494512	53439309	53619648	SEPT9
11	50035206	50106951	50087586	50095134	SIRT7
11	26396682	26412901	26410931	26413413	SLC16A11
11	26396682	26412901	26406864	26410638	SLC16A13
11	49748227	49765836	49746753	49758022	SLC16A3
11	55279774	55299042	55278723	55296923	SLC16A5
11	50577426	50639686	50544775	50584677	SLC38A10
11	57161473	57175494	57034812	57314150	SLC39A11
11	33414663	33422866	33405866	33424958	SLC47A2
11	33698625	33774160	33718955	33777211	SLC5A10
11	40376948	40384204	40361176	40383458	SMARCE1
11	33820258	34006092	33852330	33861113	SMCR8
11	22642853	22674028	22666701	22869145	SMG6
11	54878189	54934397	54874853	54882899	SMIM5
11	24683314	24690480	24662571	24684211	SMTNL2
11	54275460	54312047	54294813	54300028	SPHK1
11	34133177	34160536	34133695	34149654	SREBF1
11	20650132	20666329	20469771	20717189	SSH2
11	39518934	39536757	39535577	39559879	STARD3
11	41763488	41772556	41751943	41813579	STAT5B
11	55231136	55260020	55225074	55233987	SUMO2
11	20345851	20386427	20293794	20399629	TAOK1
11	49101345	49132909	49103733	49247199	TBCD
11	39559747	39563371	39561643	39562907	TCAP
11	9157166	9181810	9041948	9194891	TEX14
11	52954665	52958179	52945160	52956300	TMC8
11	54984928	55002034	54987301	55021675	TMEM94
11	26804947	26829083	26803132	26811057	TNFSF12
11	26804947	26829083	26811459	26814879	TNFSF13
11	4735859	4738237	4720395	4780937	TOM1L1
11	33820258	34006092	33861377	33882322	TOP3A
11	20415031	20439302	20415961	20419935	TP53I13
11	54964865	54973679	54965034	54972037	TSEN54
11	56044560	56058138	56037148	56063979	TTYH2
11	54275460	54312047	54281593	54293121	UBE2O
11	54719630	54744691	54713279	54730939	UNC13D
11	54719630	54744691	54730951	54763231	UNK
11	22395691	22411594	22400610	22412955	WDR81
11	54528175	54530161	54527906	54532882	ZACN
12	49190078	49436689	49216342	49230457	ACAP3
12	45102266	45137807	45015515	45116845	ACOT7
12	28029433	28056171	28012010	28037253	ADCK3
12	150628	439519	302616	342027	ADORA1
12	49190078	49436689	49424783	49464433	AGRN
12	46586236	46589440	46543539	46678101	AJAP1
12	58255955	58269092	58236776	58262629	ANGPTL1
12	47496074	47636510	47601863	47625540	ARHGEF16
12	35096666	35121346	35081408	35107268	BLZF1
12	13287423	13293097	13172265	13669196	BRINP3
12	13631784	13660879	13172265	13669196	BRINP3
12	77495964	77636509	77518988	77535723	C12H1orf106
12	49190078	49436689	49378350	49401983	C12H1orf159
12	39944972	39963433	39943813	39970826	C12H1orf167
12	65494204	65558023	65481032	65531557	C12H1orf27
12	4263353	4352641	4207231	4264423	C4BPA
12	77495964	77636509	77618245	77673139	CACNA1S
12	77653012	77826965	77618245	77673139	CACNA1S
12	48786605	48834065	48813952	48835688	CALML6
12	40967985	41037880	40964504	41011235	CASZ1
12	35096666	35121346	35112795	35135612	CCDC181
12	47281681	47354155	47351705	47368940	CCDC27
12	28029433	28056171	28038039	28335660	CDC42BPA
12	28076676	28162845	28038039	28335660	CDC42BPA
12	47281681	47354155	47289007	47329771	CEP104
12	48786605	48834065	48751323	48810310	CFAP74
12	4889618	4956499	4896128	5032152	CFH
12	45243649	45285288	45188580	45252957	CHD5
12	150628	439519	352222	365563	CHI3L1
12	49190078	49436689	49198672	49208855	CPSF3L
12	49190078	49436689	49194656	49198650	CPTP
12	78319043	78546521	78476870	78486034	CSRP1
12	41709191	41725923	41692878	41741502	CTNNBIP1
12	47281681	47354155	47273162	47288859	DFFB
12	26154220	26357487	26102908	26512095	DNAH14
12	78842773	79003249	78942080	78946688	ELF3
12	1280720	1293311	1268842	1287260	ETNK2
12	49190078	49436689	49253293	49264485	FAM132A
12	48223645	48585321	48282088	48295511	FAM213B
12	49799988	49818446	49772968	49804990	FBLIM1
12	513619	634321	520734	531055	FMOD
12	45102266	45137807	45118161	45130544	GPR153
12	78842773	79003249	79000460	79005314	GPR37L1
12	45102266	45137807	45132939	45133837	HES3
12	77653012	77826965	77732800	77770697	IGFN1
12	78842773	79003249	78824554	78861504	IPO9
12	45243649	45285288	45253477	45350131	KCNAB2
12	66609149	66633927	66400930	66637592	KCNK2
12	5127989	5142173	5095980	5540456	KCNT2
12	5251474	5353330	5095980	5540456	KCNT2
12	77495964	77636509	77568926	77597310	KIF21B
12	35647631	35749502	35619651	35777440	KIFAP3
12	77907016	77956769	77900269	77927773	KLHL12
12	44833701	44862589	44840221	44850678	KLHL21
12	5561776	5645466	5602091	5605849	LAX1
12	27350635	27401066	27325137	27413608	LIN9
12	47281681	47354155	47334353	47344592	LRRC47
12	1526256	1547719	1542120	1587126	MDM4
12	47496074	47636510	47494195	47597221	MEGF6
12	48223645	48585321	48247073	48286670	MMEL1
12	48223645	48585321	48440252	48487120	MORN1
12	150628	439519	343176	351745	MYBPH
12	48928436	48932260	48916284	48935596	NADK
12	78731685	78752250	78695540	78815105	NAV1
12	45464960	45498392	45350382	45499406	NPHP4
12	654183	669151	658835	666639	OPTC
12	48223645	48585321	48330760	48346313	PANK4
12	65494204	65558023	65538942	65544033	PDC
12	48223645	48585321	48411668	48429315	PEX10
12	40967985	41037880	41025949	41168408	PEX14
12	77653012	77826965	77797138	77830846	PKP1
12	48223645	48585321	48351761	48374497	PLCH2
12	44911422	44946982	44891443	44942699	PLEKHG5
12	150628	439519	141808	187520	PPFIA4
12	1455609	1463123	1448406	1456273	PPP1R15B
12	47496074	47636510	47633284	47870247	PRDM16
12	47846416	48014424	47633284	47870247	PRDM16
12	49190078	49436689	49209017	49216432	PUSL1
12	53550235	53558978	53465680	54164980	RABGAP1L
12	54096584	54105421	53465680	54164980	RABGAP1L
12	77907016	77956769	77930090	77935874	RABIF
12	58255955	58269092	58146048	58305963	RALGPS2
12	1280720	1293311	1288458	1298343	REN
12	48223645	48585321	48429463	48440124	RER1
12	55340446	55375242	55157445	55389073	RFWD2
12	11228320	11245742	11211653	11242207	RGS18
12	61583035	61584579	61570738	61642533	RGSL1
12	49190078	49436689	49403765	49409422	RNF223
12	78842773	79003249	78931021	78939443	RNPEP
12	49190078	49436689	49231046	49239349	SCNN1D
12	49190078	49436689	49274270	49286421	SDF4
12	78842773	79003249	78868946	78871400	SHISA4
12	48223645	48585321	48503366	48526088	SKI
12	49799988	49818446	49811739	49817969	SLC25A34
12	47281681	47354155	47344854	47351558	SMIM1
12	29021256	29035655	28902904	29658133	SMYD3
12	64219380	64242845	64177142	64277759	SWT1
12	78842773	79003249	78904706	78916343	TIMM17A
12	48786605	48834065	48811930	48814141	TMEM52
12	49799988	49818446	49795614	49811581	TMEM82
12	77653012	77826965	77689453	77702342	TMEM9
12	49190078	49436689	49296313	49299518	TNFRSF18
12	44911422	44946982	44942843	44947786	TNFRSF25
12	49190078	49436689	49289032	49292009	TNFRSF4
12	78319043	78546521	78520072	78535762	TNNI1
12	78319043	78546521	78537820	78556690	TNNT2
12	48223645	48585321	48232129	48246933	TTC34
12	49190078	49436689	49313348	49324092	TTLL10
12	49190078	49436689	49240191	49252725	UBE2J2
12	78319043	78546521	78333136	78336792	UBE2T
12	40446076	40454402	40434350	40446269	UBIAD1
12	17283470	17300535	16935992	17875743	USH2A
12	44833701	44862589	44855249	44863484	ZBTB48
12	61189214	61196543	61192733	61201810	ZNF648
13	74023527	74066299	74026943	74041106	ACOT8
13	41705176	41712960	41678089	41722021	ACSS1
13	53283322	53581679	53509832	53519764	ARFGAP1
13	78840595	78858570	78835097	78946748	ATP9A
13	53283322	53581679	53541493	53544763	BIRC7
13	4799272	4874770	4857868	4885517	BTBD3
13	62425794	62485091	62440917	62445896	C13H20orf144
13	53674926	54163369	54079671	54092326	CABLES2
13	16040419	16044485	15912077	16305397	CAMK1D
13	62425794	62485091	62340168	62427268	CBFA2T2
13	16468107	16529916	16387071	16475910	CCDC3
13	18972321	19267350	19012814	19259875	CCDC7
13	50646640	50663407	50637805	50647256	CDC25B
13	50646640	50663407	50647947	50661219	CENPB
13	64180112	64195542	64151591	64198825	CEP250
13	53283322	53581679	53488296	53497940	CHRNA4
13	53283322	53581679	53497948	53506867	COL20A1
13	53674926	54163369	53768021	53793841	COL9A3
13	30409059	30416682	30312230	30587810	CUBN
13	53674926	54163369	53696783	53745045	DIDO1
13	62425794	62485091	62455855	62477099	E2F1
13	53283322	53581679	53398385	53409986	EEF1A2
13	61437990	61451190	61419999	61478567	EFCAB8
13	69447220	69494734	69465402	69472176	EMILIN3
13	64783738	64789207	64674107	64808706	EPB41L1
13	58758814	58792713	58763665	58774452	FAM210B
13	78015449	78067296	78008101	78037580	FAM65C
13	53674926	54163369	54025794	54039868	GATA5
13	53674926	54163369	53688690	53696494	GID8
13	53283322	53581679	53339256	53356149	GMEB2
13	25057449	25064265	24976738	25280706	GPR158
13	54222552	54234463	54212968	54231055	HRH3
13	60375811	60406895	60371052	60389936	ID1
13	29146025	29164823	29052978	29248677	ITGA8
13	3390489	3413939	3404819	3439626	JAG1
13	53283322	53581679	53417912	53461353	KCNQ2
13	24233510	24242826	23892801	24433187	KIAA1217
13	34075234	34090910	34072220	34152633	KIAA1462
13	9833923	9875775	9536194	9848679	KIF16B
13	53674926	54163369	54109569	54161352	LAMA5
13	69447220	69494734	69446668	69463656	LPIN3
13	7400565	7426851	7012483	9329604	MACROD2
13	8428216	8454321	7012483	9329604	MACROD2
13	50587222	50590667	50585774	50597650	MAVS
13	71718301	71720789	71689754	71719946	MYBL2
13	52946485	52961269	52918885	52949249	MYT1
13	62425794	62485091	62434030	62455788	NECAB3
13	74023527	74066299	74064617	74066997	NEURL2
13	61105158	61132315	61088528	61216289	NOL4L
13	52988764	53026294	53011490	53013507	NPBWR2
13	56881104	56887164	56886537	56903094	NPEPL1
13	53674926	54163369	53796546	53804056	OGFR
13	52988764	53026294	53016770	53035335	OPRL1
13	2197637	2217222	2030638	2456641	PAK7
13	74104663	74142803	74103252	74114535	PCIF1
13	56083991	56088849	55922020	56114335	PHACTR3
13	44178401	44193513	44182883	44208397	PITRM1
13	66202	411848	393916	1234909	PLCB1
13	76380435	76391168	76304373	76480999	PREX1
13	53065624	53082228	53074153	53109387	PRPF6
13	24719776	24734620	24689728	24791975	PRTFDC1
13	53283322	53581679	53370457	53380541	PTK6
13	62425794	62485091	62471909	62490646	PXMP4
13	53674926	54163369	54063017	54078204	RBBP8NL
13	65438454	65514770	65468526	65531165	RBL1
13	53283322	53581679	53294960	53320978	RTEL1
13	50740537	50741918	50727105	50745765	SIGLEC1
13	21763218	21798012	21771144	21776596	SKIDA1
13	53674926	54163369	53669539	53685687	SLC17A9
13	53674926	54163369	53897548	53921264	SLCO4A1
13	3390489	3413939	3183205	3394806	SLX4IP
13	74023527	74066299	74020850	74026949	SNX21
13	74023527	74066299	74061630	74064468	SPATA25
13	50646640	50663407	50661366	50667382	SPEF1
13	53283322	53581679	53364877	53370446	SRMS
13	54253492	54260863	54247223	54260617	SS18L1
13	53283322	53581679	53323483	53333043	STMN3
13	55887842	55906458	55834563	55909143	SYCP2
13	41573641	41608161	41472898	41581476	SYNDIG1
13	54357882	54388974	54318559	54383649	TAF4
13	53674926	54163369	53751677	53768023	TCFL5
13	73351236	73367178	73340092	73395556	TKDP5
13	51824877	51862015	51790422	51891266	TMC2
13	66202	411848	111273	172506	TMX4
13	53124037	53141144	53131339	53139933	UCKL1
13	15666133	15675865	15587287	15682170	UPF2
13	39697647	39727266	39656439	39722097	XRN2
13	53283322	53581679	53554744	53567288	YTHDF1
13	45938485	45947635	45937739	46012145	ZMYND11
13	46008965	46027531	45937739	46012145	ZMYND11
13	75344392	75349255	75223087	75346861	ZMYND8
13	37495338	37504653	37487734	37501980	ZNF133
13	74104663	74142803	74115455	74136392	ZNF335
13	53124037	53141144	53118357	53125508	ZNF512B
13	56432239	56434895	56366244	56434318	ZNF831
13	74023527	74066299	74057027	74061303	ZSWIM1
13	74023527	74066299	74041240	74057071	ZSWIM3
14	47492145	47562924	47483673	47554487	ACTN4
14	49033433	49041729	49017148	49034910	ADCK4
14	24963592	24973800	24966375	25002078	ADGRG1
14	24870653	24937828	24887624	24914321	ADGRG5
14	13330673	13555200	13491095	13493721	APRT
14	45456349	45530924	45505586	45516577	ARHGAP33
14	50285974	50310500	50273047	50295422	ARHGEF1
14	7118683	7121484	7108413	7123543	ATMIN
14	34289566	34321498	34294889	34332633	ATP6V0D1
14	54977242	54981615	54980382	54987406	BCL2L12
14	52261416	52292107	52245498	52266881	BHMG1
14	59315854	59322545	59315301	59340556	BRSK1
14	12778694	12830407	12797037	12825860	CA5A
14	47492145	47562924	47556947	47569866	CAPN12
14	13330673	13555200	13527324	13540740	CBFA2T3
14	24870653	24937828	24860468	24881906	CCDC102A
14	54783334	54797068	54772570	54797551	CCDC155
14	50285974	50310500	50297983	50302451	CD79A
14	33868498	33872788	33864972	33874846	CDH16
14	14007893	14088451	14046950	14054488	CDK10
14	13330673	13555200	13478521	13490937	CDT1
14	43004286	43022899	42995327	43004957	CEBPG
14	14007893	14088451	14029519	14034547	CHMP1A
14	43355155	43414692	43300395	43374922	CHST8
14	49935122	49938363	49930262	49957981	CIC
14	7595229	7635190	7430649	7646731	CMIP
14	1013293	1024104	996835	1022199	COG4
14	34649537	34664067	34661251	34665609	CTRL
14	13330673	13555200	13393754	13413228	CTU2
14	1126127	1132797	1110280	1128800	DDX19A
14	45169676	45178147	45159862	45173152	DMKN
14	52261416	52292107	52280512	52289052	DMPK
14	52261416	52292107	52290289	52297458	DMWD
14	14007893	14088451	14010108	14021127	DPEP1
14	25042347	25105346	25036138	25058296	DRC7
14	48269630	48282740	48269042	48270453	EID2
14	59453722	59497295	59452245	59465345	EPS8L1
14	51939847	51950830	51942656	51959184	ERCC2
14	14007893	14088451	14086057	14125090	FANCA
14	34098751	34117681	34111542	34127758	FHOD1
14	1013293	1024104	1022451	1036935	FUK
14	13330673	13555200	13495165	13510446	GALNS
14	45350590	45357878	45348891	45359643	HAUS5
14	45456349	45530924	45480344	45484456	HSPB6
14	45456349	45530924	45466646	45467630	IGFLR1
14	13330673	13555200	13353893	13357281	IL17C
14	54977242	54981615	54974797	54980308	IRF3
14	59164227	59263835	59207186	59212339	ISOC2
14	49033433	49041729	49038053	49055736	ITPKC
14	12612324	12640027	12623533	12670440	JPH3
14	25042347	25105346	25059970	25077098	KATNB1
14	43355155	43414692	43408074	43422523	KCTD15
14	25042347	25105346	25078093	25110520	KIFC3
14	51939847	51950830	51938052	51943019	KLC3
14	12676092	12681931	12673569	12711706	KLHDC4
14	45456349	45530924	45446208	45466125	KMT2B
14	59286145	59288356	59284648	59290682	KMT5C
14	1823678	1834740	1830275	1837900	LDHD
14	45456349	45530924	45474183	45479514	LIN37
14	54092060	54096424	54086641	54106097	LMTK3
14	42833965	42916179	42828176	42840033	LRP3
14	34098751	34117681	34094159	34109200	LRRC29
14	5895535	5922661	5895035	5993951	MAF
14	9825044	9833851	9823413	9871664	MBTPS1
14	868227	880941	870579	888320	MTSS1L
14	13330673	13555200	13368778	13375409	MVD
14	14636125	14645677	14500383	14710863	MYLK3
14	35970917	36000060	35910190	36023359	NFAT5
14	51746320	51773710	51773408	51784546	NKPD1
14	60334116	60337607	60334729	60378620	NLRP5
14	18503288	18554813	18534367	18568406	NOD2
14	45770180	45786633	45784740	45787412	OVOL3
14	13330673	13555200	13517396	13521750	PABPN1L
14	47953647	47966162	47949517	47964618	PAK4
14	60912487	60914563	60910965	60919946	PEG3
14	43004286	43022899	43008292	43132181	PEPD
14	38569869	38592714	38568123	38631651	PHLPP2
14	13330673	13555200	13412860	13435330	PIEZO1
14	7257781	7259953	7162450	7265072	PKD1L2
14	7843878	7847769	7713288	7864503	PLCG2
14	54368903	54373346	54362611	54392435	PLEKHA4
14	39455526	39473994	39471426	39480343	PLEKHF1
14	48157065	48169006	48167056	48177202	PLEKHG2
14	51746320	51773710	51729012	51766056	PPP1R37
14	52565393	52573635	52557172	52577672	PPP5C
14	59362038	59390176	59363157	59381190	PPP6R1
14	52780258	52784688	52750938	52782216	PRKD2
14	45456349	45530924	45524253	45540575	PRODH2
14	45456349	45530924	45484798	45495918	PROSER3
14	48786297	48795512	48785013	48799837	PRX
14	45456349	45530924	45471601	45473005	PSENEN
14	34649537	34664067	34635623	34661404	PSKH1
14	59362038	59390176	59386566	59401895	PTPRH
14	59453722	59497295	59478612	59495856	RDH13
14	13330673	13555200	13398961	13405986	RNF166
14	59164227	59263835	59253920	59258931	RPL28
14	50285974	50310500	50308462	50316437	RPS19
14	48806913	48822241	48808345	48811256	SERTAD1
14	48806913	48822241	48818097	48821476	SERTAD3
14	59164227	59263835	59223445	59228264	SHISA7
14	47018682	47027744	46853098	47103580	SIPA1L3
14	52261416	52292107	52267021	52278859	SIX5
14	42833965	42916179	42841151	42857676	SLC7A10
14	12778694	12830407	12757289	12781636	SLC7A5
14	50904014	50908633	50906919	50928710	SMG9
14	13330673	13555200	13387746	13393540	SNAI3
14	18503288	18554813	18515196	18524545	SNX20
14	14007893	14088451	14054494	14058205	SPATA2L
14	14007893	14088451	14036353	14045952	SPATA33
14	14157858	14194677	14131902	14158782	SPIRE2
14	59164227	59263835	59150134	59172535	SSC5D
14	52322691	52332340	52323472	52353450	SYMPK
14	45691258	45692874	45688725	45694056	SYNE4
14	14157858	14194677	14161074	14182209	TCF25
14	59164227	59263835	59261736	59266419	TMEM190
14	34098751	34117681	34094707	34111422	TMEM208
14	59164227	59263835	59260400	59263484	TMEM238
14	59362038	59390176	59382949	59385184	TMEM86B
14	13330673	13555200	13510499	13515629	TRAPPC2L
14	45456349	45530924	45469263	45471547	U2AF1L4
14	59164227	59263835	59243763	59247825	UBE2S
14	14007893	14088451	14061630	14071145	VPS9D1
14	45770180	45786633	45729925	45780376	WDR62
14	42776289	42798027	42743521	42794791	WDR88
14	13330673	13555200	13308590	13350868	ZC3H18
14	53060653	53087236	53067641	53102073	ZC3H4
14	60665955	60675471	60650585	60703826	ZFP28
14	60692067	60701097	60650585	60703826	ZFP28
14	13114611	13289661	13213471	13255973	ZFPM1
14	14007893	14088451	14058274	14085865	ZNF276
14	61310421	61407477	61335875	61343007	ZNF304
14	46524655	46553850	46540770	46569671	ZNF420
14	13114611	13289661	12920281	13174487	ZNF469
14	42065385	42088474	42049759	42092069	ZNF507
14	40147406	40168075	39948559	40404300	ZNF536
14	59164227	59263835	59175675	59182775	ZNF628
14	60709032	60721318	60704893	60710232	ZNF835
15	34594507	34628536	34527874	34608755	ABCC8
15	41838754	41849225	41847501	41849842	ADM
15	75595657	75601693	75575045	75604390	AGBL2
15	72454442	72469855	72452597	72504769	ALX4
15	72500187	72505616	72452597	72504769	ALX4
15	74497842	74521142	74517475	74653713	AMBRA1
15	15191798	15408282	14997639	15197937	AMOTL1
15	23356633	23368436	23350367	23363975	ANKK1
15	54890234	54950244	54934858	55394503	ANO3
15	55360315	55375905	54934858	55394503	ANO3
15	26925586	26953314	26932026	26934942	APOA4
15	26925586	26953314	26940125	26942730	APOC3
15	75194888	75224502	75188811	75197802	ARFGAP2
15	74769737	74777132	74750861	74770316	ARHGAP1
15	50882722	50906843	50903679	50960519	ARHGEF17
15	49543844	49592468	49559796	49566026	ART1
15	50469886	50480765	50458550	50473921	ATG16L2
15	17326002	17411042	17300492	17454856	ATM
15	38725203	38728629	38725635	38802080	BTBD10
15	17473240	17597519	17472894	17590110	C15H11orf65
15	29348879	29378040	29352253	29354011	C1QTNF5
15	54532452	54572737	54512768	54568874	CAPN5
15	56058446	56081780	56081009	56127280	CCDC34
15	13311025	13312105	13305215	13338988	CCDC82
15	6335848	6395892	6326503	6448938	CEP126
15	27480360	27485365	27454863	27524929	CEP164
15	74497842	74521142	74500603	74504727	CHRM4
15	49543844	49592468	49552301	49556979	CHRNA10
15	8269671	8340841	8313097	9946894	CNTN5
15	8662658	8707016	8313097	9946894	CNTN5
15	8876605	9025380	8313097	9946894	CNTN5
15	9047425	9075328	8313097	9946894	CNTN5
15	9205972	9283760	8313097	9946894	CNTN5
15	9363344	9567625	8313097	9946894	CNTN5
15	9592475	9673415	8313097	9946894	CNTN5
15	37742251	37764400	37737931	37771406	COPB1
15	61841863	61852356	61804316	61871768	CSTF3
15	15583126	15595664	15517979	15673564	CWF19L2
15	75194888	75224502	75220756	75241508	DDB2
15	45806852	45829952	45792597	45867205	DNHD1
15	45865412	45886086	45792597	45867205	DNHD1
15	27671697	27675675	27545925	27895792	DSCAML1
15	27718309	27747971	27545925	27895792	DSCAML1
15	79300762	79336590	79272108	79313244	DTX4
15	4633228	4697431	4658291	5043667	DYNC2H1
15	4805287	4812460	4658291	5043667	DYNC2H1
15	4840999	4940828	4658291	5043667	DYNC2H1
15	4969075	5028424	4658291	5043667	DYNC2H1
15	60437010	60530463	60407230	60646775	ELP4
15	51083338	51096869	50991613	51194526	FAM168A
15	50721298	50725306	50480802	50737104	FCHSD2
15	65017	1058533	936390	952052	GPR83
15	33663197	33665439	33537469	33727964	GRAMD1B
15	1460467	1575055	1439067	2098596	GRIA4
15	1620833	1692760	1439067	2098596	GRIA4
15	1811921	1827920	1439067	2098596	GRIA4
15	1885117	2000140	1439067	2098596	GRIA4
15	15849902	15895530	15781742	16236443	GUCY1A2
15	15915483	15924654	15781742	16236443	GUCY1A2
15	62015081	62029526	61973178	62059124	HIPK3
15	62043996	62054791	61973178	62059124	HIPK3
15	49741062	49763053	49747376	49749923	IL18BP
15	34594507	34628536	34613079	34615951	KCNJ11
15	78946222	78951931	78907390	78947370	LPXN
15	52839667	52874187	52854511	52936834	MAP6
15	74497842	74521142	74497609	74500468	MDK
15	56857749	56871192	56852233	57110061	METTL15
15	56937441	56950564	56852233	57110061	METTL15
15	29348879	29378040	29354030	29359997	MFRP
15	39965635	40186594	39878791	40117702	MICAL2
15	65017	1058533	986328	1061948	MRE11A
15	80027012	80041800	80033296	80062868	MS4A14
15	80027012	80041800	80012482	80030756	MS4A7
15	54532452	54572737	54570739	54674150	MYO7A
15	80281083	80289287	80283373	80345857	NCAPD3
15	34594507	34628536	34621057	34634517	NCR3LG1
15	49741062	49763053	49750462	49817504	NUMA1
15	49543844	49592468	49457195	49545158	NUP98
15	30244143	30264401	30255185	30266214	OAF
15	54532452	54572737	54542993	54544854	OMP
15	50882722	50906843	50859911	50895554	P2RY6
15	75194888	75224502	75198616	75207942	PACSIN3
15	27342482	27351212	27347193	27372350	PCSK7
15	50239229	50297337	50242627	50336977	PDE2A
15	37437019	37455384	37418595	37596319	PDE3B
15	37581254	37590372	37418595	37596319	PDE3B
15	3694747	3864304	3852935	4137382	PDGFD
15	21771151	21772973	21761155	21773137	PIH1D2
15	15191798	15408282	15302434	15356099	PIWIL4
15	35001837	35012021	34958730	35177862	PLEKHA7
15	64865808	64968494	64939712	65016879	PRR5L
15	51279205	51284214	51255887	51339632	RAB6A
15	49741062	49763053	49661967	49747518	RNF121
15	52187637	52195899	52155217	52244294	RNF169
15	29348879	29378040	29347641	29350431	RNF26
15	37861245	37883881	37867815	37948003	RRAS2
15	42091932	42134246	41859693	42361681	SBF2
15	77880212	77900628	77899837	77907523	SMTNL1
15	35219357	35417032	35279286	36032287	SOX6
15	35755729	35766386	35279286	36032287	SOX6
15	43487030	43517637	43422827	43623645	STK33
15	27342482	27351212	27341499	27346971	TAGLN
15	39478447	39514460	39275155	39543715	TEAD1
15	77880212	77900628	77880850	77883991	TIMM10
15	45865412	45886086	45877210	45879650	TIMM10B
15	73074919	73099980	73091125	73106456	TP53I11
15	28766951	28793130	28765256	28777062	TREH
15	45910307	45913992	45896501	45913291	TRIM3
15	6864521	6886994	6882269	7036815	TRPC6
15	54254733	54267635	54242337	54259914	TSKU
15	73074919	73099980	72883345	73090817	TSPAN18
15	29348879	29378040	29367379	29392763	USP2
15	40287745	40324853	40253920	40357204	USP47
15	74769737	74777132	74769364	74775132	ZNF408
16	14116700	14337176	14036589	14330578	ADAMTS6
16	70615895	70732923	70555459	70634048	AHRR
16	10019702	10082404	9995641	10078636	BDP1
16	70466632	70479643	70477115	70488655	CCDC127
16	31598950	31891338	31732793	31778737	CCDC152
16	48438132	49184318	48675021	48861512	CDH10
16	49931179	51171851	50234223	51432372	CDH12
16	51274952	51313447	50234223	51432372	CDH12
16	52691768	53023868	52565688	53864659	CDH18
16	53282089	53350098	52565688	53864659	CDH18
16	53614155	53799346	52565688	53864659	CDH18
16	42107426	42306633	42088165	42238263	CDH6
16	46590680	46625353	46462928	46604697	CDH9
16	71258476	71689081	71582140	71596250	CLPTM1L
16	62379592	62389737	62355560	62406613	DAP
16	23888877	23893145	23888636	23944756	DHX29
16	2046570	2060492	1579978	2052758	DOCK2
[truncated: 887 more rows]

## Sheet: Supplementary Table S6
Supplementary Table S6. The significantly enriched GO terms and KEGG pathways associated with the 2892 overlapping genes for 4769 CNVR.
Category	Term	Count	%	PValue	Genes	List Total	Pop Hits	Pop Total	Fold Enrichment	Bonferroni	Benjamini	FDR
UP_KW_BIOLOGICAL_PROCESS	KW-0235~DNA replication	12	0.428266	0.000269421	ORC4, BLM, NFIX, CHAF1A, CDC45, RECQL5, RFC1, NFIC, CDC6, LRWD1, POLE, MCM2	491	35	5127	3.5801	0.0294669	0.0299058	0.0296363
UP_KW_CELLULAR_COMPONENT	KW-0963~Cytoplasm	162	5.78158	5.45632e-05	PANK4, RNH1, CCNF, ARHGDIG, LTN1, CIB2, CASC3, MSI2, APEH, NUBP2, STK11, MAEA, CCND1, SNRPD3, ANKS1A, LZTS1, CDK5RAP2, DYNC2H1, GUCY1A2, S100A1, PRKCE, NANOS3, PRKCD, MYO7B, ANK2, MYO7A, FRMD4B, MAPK8IP3, SND1, RNF126, KATNAL2, SPECC1L, FSCN1, PRKD2, FSCN2, PRKD1, FKBP4, PADI1, DRC7, TUBGCP2, PADI6, PPP1R35, COPB1, PXN, DTX3, KLC1, DTX4, ARPP19, PPL, EVPL, CORO1A, CORO1B, CAMSAP1, KLC3, ODF2L, ND…	1069	1341	11844	1.33846	0.00239797	0.00186542	0.00165344
UP_KW_CELLULAR_COMPONENT	KW-0272~Extracellular matrix	26	0.927909	8.47916e-05	FBN2, FBN3, LAMA5, LAMA2, LAMC3, COL11A1, COL11A2, LTBP3, ADAMTS4, WNT1, ADAMTS6, ADAMTS7, COL28A1, WNT10B, COL27A1, COL24A1, WNT7B, HSPG2, COL1A1, SMOC2, COL3A1, COL5A1, RBP3, COL4A4, COL7A1, COL4A3	1069	123	11844	2.34201	0.00372404	0.00186542	0.00165344
UP_KW_CELLULAR_COMPONENT	KW-0966~Cell projection	39	1.39186	0.000542925	DNAH1, DRC7, SPEF1, CIB2, CACNA1C, CASC3, PKD1, SLC6A3, IFT74, ODF2L, PCLO, ALCAM, GLRA3, SH3PXD2B, CCDC181, CFAP69, BSN, N4BP3, CFAP45, PACSIN1, DYNC2H1, DNAH11, CFAP74, IFT140, DNAH14, CDC42BPB, KCNAB2, BAIAP2, CFAP157, CDC42BPA, MYO9A, BCR, RP1L1, FCHSD2, TH, TBC1D24, DPEP1, EVL, MNS1	1069	243	11844	1.77819	0.023612	0.0079629	0.00705803
UP_KW_MOLECULAR_FUNCTION	KW-0418~Kinase	134	4.7823	6.78239e-12	PANK4, PI4K2B, MAPKBP1, DGKD, PLXND1, DGKB, ZMYND8, KNDC1, STK19, STKLD1, MYLK3, STK11, RPS6KA1, PDK4, CDK20, PIP4K2C, MAP3K6, STK32C, PSKH1, MAP2K3, MAGI1, EPHA7, PRKCI, EPHA8, PRKCE, MAGI2, PRKCD, IPMK, LMTK3, LMTK2, PRKCA, MAPK8IP2, MAPK8IP3, OBSCN, MELK, DGKQ, ULK1, PRKD2, PRKD1, EPHA1, ANKK1, EPHA2, BRSK1, MST1R, PKMYT1, STK3, STK33, TKFC, PLXNA1, PIP5K1C, IP6K1, GCN1, PLXNA4, IP6K3, NADK, P…	889	755	8948	1.78641	5.96847e-10	5.9685e-10	5.49374e-10
UP_KW_MOLECULAR_FUNCTION	KW-0808~Transferase	245	8.74375	7.0683e-07	PANK4, PI4K2B, MAPKBP1, ZMYND8, EHMT2, EHMT1, ZDHHC8, UBE2L3, ALKBH5, FLAD1, RPS6KA1, PDK4, CDK20, PIP4K2C, HEMK1, EPHA7, TSTD3, PRKCI, ESCO1, EPHA8, PRKCE, PRKCD, TALDO1, PRKCA, MAPK8IP2, MAPK8IP3, GBGT1, CDC34, ULK1, PRKD2, PRKD1, ANKK1, EPHA1, EPHA2, NAA60, SHMT2, MEPCE, TMTC2, NEDD4L, MST1R, PTDSS2, RNF216, TERT, DPH1, PRDM16, PIP5K1C, B4GALNT3, B4GALNT4, BARD1, PLK3, SRMS, CHKA, DMPK, ST8SIA…	889	1878	8948	1.31309	6.21991e-05	3.11005e-05	2.86266e-05
UP_KW_MOLECULAR_FUNCTION	KW-0378~Hydrolase	180	6.42398	5.9223e-05	EIF4A1, PGAP1, ANKLE1, HDAC10, MPG, HDAC11, NUDT1, TTF2, APEH, CAPN15, TSEN54, ENDOU, NPEPPS, HELB, EME2, HMCES, CAPN5, RUVBL1, MACROD1, LONP1, NUDT18, MACROD2, ARSA, ACOT8, HFM1, ADPRHL1, USP2, PRSS57, MOGS, HDHD3, CDC25B, CTDNEP1, XRN2, DPEP1, DXO, NEIL1, CFB, PDE9A, PADI1, CPB2, EXD3, BLM, RTEL1, USP53, PADI6, DDX1, PDE1A, HTRA3, YTHDC2, ABHD8, RPAP2, PLA2G7, C2, BRIP1, DPP6, ADAMTS13, INPP5A,…	889	1390	8948	1.30341	0.00519822	0.00173721	0.00159902
UP_KW_MOLECULAR_FUNCTION	KW-0009~Actin-binding	26	0.927909	0.000188381	SPTBN5, FLII, ARPP19, MAEA, MYO18B, XIRP1, PHACTR3, FLNB, FLNC, VILL, GC, PLS1, GSN, HIP1R, MYO5A, MICAL2, MYO9B, SHROOM1, ACTN4, MYO19, MYO9A, MYO15A, SPIRE2, EVL, LCP1, FSCN2	889	118	8948	2.21777	0.0164424	0.00414438	0.00381471
UP_KW_MOLECULAR_FUNCTION	KW-0407~Ion channel	50	1.78444	0.000270474	RYR2, KCNK7, GRIK2, KCNT1, KCNT2, PIEZO1, GRID2, KCNH5, KCNH8, TMC8, KCNAB1, CACNA2D4, KCNAB2, TMC2, GABRG1, CACNB1, SCNN1G, SCN10A, SCNN1D, KCNQ1, KCNQ2, SCN4A, HCN4, TTYH3, TTYH2, CHRNA4, ITPR2, CACNA1C, CACNA1G, CACNA1I, TRPM2, GLRA3, KCNN2, CACNA1S, SCN3A, KCNJ1, CACNG3, ASIC3, LRRC8E, GRIA4, KCNJ11, KCNJ12, SCLT1, P2RX6, P2RX5, GRIN3B, P2RX2, SCN2A, KCNK2, MCU	889	299	8948	1.68315	0.0235238	0.00439793	0.0040481
UP_KW_MOLECULAR_FUNCTION	KW-0723~Serine/threonine-protein kinase	38	1.35617	0.000299859	CAMK2D, PRKDC, PKN3, MAST2, CAMK2A, PKMYT1, STK33, PHKG1, MKNK1, MKNK2, RPS6KA1, CDK20, MAPK1, RIOK2, MAP3K6, CAMK2G, STK32C, PSKH1, MAP2K3, PLK3, PRKCI, CAMK1D, DMPK, RIPK2, CDC42BPB, CDC42BPA, MAPK15, DCLK1, MAPK12, CLK1, OBSCN, MELK, CDK10, FAM20C, ULK1, PKN2, PRKD2, PRKD1	889	208	8948	1.83884	0.0260463	0.00439793	0.0040481
UP_KW_MOLECULAR_FUNCTION	KW-0344~Guanine-nucleotide releasing factor	15	0.535332	0.00128087	ARFGEF1, DENND1C, FARP1, DOCK4, DENND4A, DENND1A, GBF1, DOCK7, DENND4C, VAV2, BCR, RABIF, RIC8B, DOCK2, SBF2	889	58	8948	2.60308	0.106661	0.0161024	0.0148215
UP_KW_MOLECULAR_FUNCTION	KW-0347~Helicase	24	0.856531	0.00182291	EIF4A1, RTEL1, BLM, HFM1, DDX46, YTHDC2, TDRD9, CHD5, DDX51, TTF2, CHD2, SENP3, CHD1, RECQL4, IFIH1, BRIP1, HELB, RECQL5, RUVBL1, ERCC2, HLTF, ASCC3, DHX29, MCM2	889	122	8948	1.98005	0.148336	0.020052	0.018457
UP_KW_MOLECULAR_FUNCTION	KW-0343~GTPase activation	14	0.499643	0.00380464	RALBP1, STARD13, RAP1GDS1, AGAP1, MYO9B, AGAP3, ARHGAP26, ARHGAP15, MYO9A, BCR, DLC1, NF1, RGS12, RIN1	889	58	8948	2.42954	0.284982	0.0372009	0.0342418
UP_KW_PTM	KW-0597~Phosphoprotein	119	4.24697	9.56798e-05	ALDH1L1, ZMYND8, ANTXR2, ALDH1L2, CCND1, RPS6KA1, TNS3, TNS2, EPHA7, PRKCI, IL4R, EPHA8, PRKCE, PRKCD, SLC6A13, PRKCA, LEMD3, OBSCN, ADGRB3, FEZ2, ADGRB1, KCNQ2, MATR3, EPHA1, EPHA2, FKBP5, FAM114A1, PRKDC, AIRE, LPO, MST1R, PPL, EVPL, CORO1A, IQGAP3, BAG6, HRH3, EPB41L1, TBXA2R, CASKIN2, CASKIN1, PLCG2, SCN3A, DMPK, HMGA1, HTR1B, ESR1, PRRC2B, PTPRE, MAVS, TH, PTK7, FASN, PPP1R1B, NF1, SCN2A, FG…	393	869	3894	1.35685	0.0024847	0.00248767	0.00248767
UP_SEQ_FEATURE	REGION:Disordered	1765	62.9907	1.89331e-66	FGFR3, GPSM1, MEGF11, IRF2BPL, LRRTM3, SNAPC2, SIX5, MCF2L, SNAPC4, TOPBP1, STPG1, RHBDF2, AXIN1, IQCE, AXIN2, IQCJ, DNM1, FCHSD2, PEAK1, COL6A2, COL6A6, CDH16, COLEC11, NRXN1, LEF1, NRXN3, LIN9, TBRG4, FAM168A, GNA12, POC1A, SNCG, HES3, MUC4, MUC6, KDM4B, NOS3, ATP13A1, LIMK1, DEK, MLPH, RPS6KB2, CDK2AP2, ATP13A2, FSIP1, LPIN3, MAPKBP1, PGAP1, EHMT2, TMEM94, EHMT1, TSEN54, PREX1, C3H12ORF40, MEF…	2265	14291	23108	1.26002	2.18299e-63	2.18299e-63	2.14133e-63
UP_SEQ_FEATURE	COMPBIAS:Polar residues	970	34.6181	7.44759e-47	MYO18B, ZNF385B, MYBL2, LRRFIP1, ZNF385D, SCARF2, SCARF1, CFAP45, ARHGEF11, SUN1, PDPK1, ARHGEF17, ARHGEF16, C19H3ORF18, NAV1, SHROOM1, TCTE1, CFAP100, ELF2, MMRN1, VGF, ELF3, TBC1D4, TBC1D5, CDHR5, ZMYND11, SHANK3, SHANK2, LAMA5, CCDC187, DNAH1, PTX4, ANKS3, NWD1, PDLIM2, RAB40C, SH3TC1, CCDC181, EPS8L1, ARFGEF1, EYA1, SWT1, BNIP3, EYA4, SOD3, EPOR, TTC16, GALNS, MAPK10, PROB1, MYO15A, TBX10, BC…	2265	6792	23108	1.45703	8.58707e-44	4.29353e-44	4.21161e-44
UP_SEQ_FEATURE	COMPBIAS:Polar residues	970	34.6181	7.44759e-47	ATF2, MAPKBP1, TMEM94, EHMT1, HTR6, ALKBH5, C3H12ORF40, MEF2A, STARD9, HSPG2, BCR, SPINT1, RABL6, ZNF276, AIRE, NPRL3, MEPCE, GATA5, AGAP1, PLA2G3, AGAP3, BAZ2B, GATA2, RNF216, EPB41L1, NPBWR2, PIP5K1C, ZBTB7B, AMZ1, PROSER3, HEXIM1, CFAP74, JAG1, PRRT2, LRBA, BTBD10, RNF223, UCK2, GRIN3B, FAT4, PTH1R, HOXC12, PEAR1, EFCAB8, HOXC10, MYPN, EEA1, NIPBL, CHAF1A, NELFE, APC2, LRRC46, RIPK2, SPHK1, NS…	2265	6792	23108	1.45703	8.58707e-44	4.29353e-44	4.21161e-44
UP_SEQ_FEATURE	COMPBIAS:Pro residues	421	15.025	1.00918e-33	MAPKBP1, ANKLE1, ADARB1, SLC4A2, CAPN15, NYNRIN, RAVER1, WDR90, HOXA3, CDK20, RNF111, C18H15ORF39, MEF2A, SCRIB, HSPG2, UNC13D, KIAA1217, CDIP1, RABL6, ZNF276, ZNF395, WDR62, AGAP3, RNF215, PRDM16, ALX4, ZBTB7B, RREB1, PROSER3, PLK3, PRRT2, CHKA, COL24A1, MEX3D, COL1A1, GIPC3, FASN, AGO2, PRR36, PRR35, SETD5, SETD2, DENND1A, SMG9, HOXC11, TRIM8, CIC, APC2, CEP68, NSUN2, NUDT16L1, DUSP8, NCOR2, RN…	2265	2444	23108	1.75742	1.16358e-30	3.8786e-31	3.8046e-31
UP_SEQ_FEATURE	COMPBIAS:Basic and acidic residues	792	28.2655	3.94388e-30	ATF2, PGAP1, EHMT2, TMEM94, EHMT1, ALKBH5, STARD9, BCR, RFX6, RABL6, ZNF276, EXD3, TTYH3, FLII, AGAP1, ABCB8, BAZ2B, EPB41L1, PIP5K1C, AMZ1, PROSER3, HEXIM1, HEXIM2, CFAP74, JAG1, NCAPH2, LRBA, BTBD10, GRIN3B, FAT4, ARHGAP1, TFCP2L1, PTH1R, HOXC12, PEAR1, HOXC10, MYPN, NIPBL, CHAF1A, DLGAP2, NELFE, APC2, LRRC47, UPF2, SPHK1, MYOF, TEX15, SIRT7, BAZ1A, DUSP8, LRRD1, TMC2, PHF20L1, PXDN, RAPGEF1, S…	2265	5746	23108	1.40622	4.54729e-27	1.13682e-27	1.11513e-27
UP_SEQ_FEATURE	DOMAIN:PH	57	2.03426	3.71715e-08	PLEKHF1, DGKD, RTKN2, OSBPL11, PREX1, MCF2L, KIF1A, SBF2, RALGPS2, PLEKHJ1, ARHGEF11, PSD, PLEKHG2, PLEKHG5, ARHGEF16, ARHGEF19, TBC1D2B, DNM1, VAV2, BCR, ACAP3, ACAP2, OBSCN, ACAP1, DOK7, PRKD2, PLEKHO2, PRKD1, OSBP2, PHLPP2, PHLPP1, ARHGEF25, AGAP1, AGAP3, ARHGAP15, FGD2, SH3BP2, PLCG2, PLEKHH1, SPTBN1, FARP2, FARP1, OSBPL6, OSBPL5, PLCL1, CADPS, PLCL2, PLEKHA5, CDC42BPB, PLEKHA4, CDC42BPA, ARH…	2265	268	23108	2.16987	4.28579e-05	8.57176e-06	8.4082e-06
UP_SEQ_FEATURE	COMPBIAS:Acidic residues	155	5.53176	1.15205e-07	MAPKBP1, GALNT15, MYT1L, EHMT2, TONSL, DNHD1, EHMT1, CASC3, PHRF1, CCDC102A, NYNRIN, IPO9, EVA1B, ZNF326, KIF21B, SOX6, BAHCC1, SOX5, FBXW7, SKIDA1, LMTK3, LMTK2, SCRIB, MAPK8IP2, LEMD3, GTF2F1, MYT1, NISCH, SCN10A, TMX4, MATR3, CCDC82, ANAPC2, PPP1R37, CUL9, CCDC27, CASZ1, DRC7, PAXIP1, KMT2B, NOP2, PCDH15, XPC, BAZ2B, RNPC3, FAM83G, SBNO2, LOXHD1, WDR70, INPP5D, PRDM16, ZC3H18, HIVEP3, TNRC18, …	2265	1042	23108	1.5176	0.000132823	2.21386e-05	2.17162e-05
UP_SEQ_FEATURE	DOMAIN:SH3	50	1.78444	1.83396e-07	DOCK4, PPP1R13B, CRKL, LASP1, MCF2L, SH3PXD2B, ARHGEF16, MYO7B, ARHGEF19, MYO7A, MAPK8IP2, VAV2, FGR, CACNB1, OBSCN, FCHSD2, DOCK2, SHANK3, STAM2, SHANK2, PIK3R2, PIK3R1, SNX33, EVPL, FUT8, SH3TC1, CASKIN2, CASKIN1, PLCG2, PACSIN3, EPS8L1, EPS8L2, SRGAP3, SASH1, PACSIN1, SRMS, PTK6, NEB, BAIAP2, ARHGAP26, SORBS3, ARHGAP33, SH3RF3, MYO1E, DLG2, SH3D21, MYO15A, DLG5, NOXA1, FRK	2265	232	23108	2.19875	0.000211433	3.02079e-05	2.96315e-05
UP_SEQ_FEATURE	DOMAIN:Calponin-homology (CH)	27	0.963597	2.27133e-07	TAGLN, SPTBN5, SPEF1, IQGAP3, CAMSAP1, CNN2, FLNB, FLNC, GAS2L1, SPTBN1, PLS1, MICAL2, PARVB, ACTN4, VAV2, CAMSAP3, CCDC88A, SMTN, PARVG, SPECC1L, EHBP1L1, GAS2, TAGLN2, LCP1, SMTNL2, LRCH3, SMTNL1	2265	89	23108	3.09505	0.00026185	3.27356e-05	3.2111e-05
UP_SEQ_FEATURE	DOMAIN:EGF-like	50	1.78444	1.45748e-06	CNTNAP2, SNED1, MEGF11, PEAR1, NAGPA, ADGRE2, ADGRE5, STAB1, HYAL3, HMCN2, SVEP1, SCARF2, SCARF1, HGFAC, CUBN, EGFL7, VWDE, HSPG2, F7, MMRN1, ADAM12, ADAM9, MFGE8, GAS6, CRB2, FBN2, FBN3, MEGF6, NOTCH1, LRP1, NRXN1, PROZ, LTBP3, TPO, SCUBE1, SLIT1, SLIT3, JAG1, F10, ATRNL1, ADAM32, LRP1B, DLK2, NELL2, BMP1, TLL2, TLL1, FAT4, AGRN, UMODL1	2265	248	23108	2.0569	0.00167907	0.00018672	0.000183157
UP_SEQ_FEATURE	BINDING:ATP	77	2.74804	2.87483e-06	ALK, FLT4, AATK, MYLK3, STK11, RPS6KA1, CDK20, MAP3K6, PRKG1, STK32C, PSKH1, MAP2K3, EPHA7, PRKCI, CAMK1D, EPHA8, PDPK1, RIPK2, PRKCE, PRKCD, LMTK3, LMTK2, PRKCA, TYK2, PASK, FGR, OBSCN, MELK, ULK1, PRKD2, PRKD1, EPHA1, EPHA2, CAMK2B, BRSK1, CAMK2D, PKN3, CAMK2A, MST1R, PKMYT1, CAMKK1, STK3, STK33, PHKG1, MKNK1, MKNK2, ERBB2, MAPK1, PAK6, CKB, CAMK2G, PAK4, PLK3, SRMS, DMPK, LIMK1, PTK6, CDC42BPB…	2265	456	23108	1.72274	0.0033092	0.000331468	0.000325143
UP_SEQ_FEATURE	DOMAIN:Protein kinase	85	3.03355	1.10237e-05	ALK, MAST2, FLT4, AATK, STKLD1, MYLK3, STK11, RPS6KA1, PBK, CDK20, MAP3K6, PRKG1, STK32C, SCYL1, PSKH1, MAP2K3, EPHA7, PRKCI, CAMK1D, EPHA8, PDPK1, RIPK2, PRKCE, PRKCD, LMTK3, LMTK2, PRKCA, TYK2, PASK, FGR, GAK, OBSCN, MELK, PEAK1, ULK1, PRKD2, PRKD1, EPHA1, ANKK1, STK40, EPHA2, CAMK2B, BRSK1, CAMK2D, PKN3, CAMK2A, MST1R, PKMYT1, CAMKK1, TTN, STK3, STK33, PHKG1, MKNK1, MKNK2, ERBB2, MAPK1, PAK6, …	2265	537	23108	1.61487	0.0126299	0.00110733	0.0010862
UP_SEQ_FEATURE	REPEAT:WD	49	1.74875	1.15247e-05	SPAG16, MAPKBP1, WDR1, WDSUB1, WDR4, WDR83, PWP2, EFCAB8, RRP9, WDR88, CDC20, WDR90, MLST8, KIF21B, IFT140, FBXW7, FBXW11, FBXW9, DDB2, THOC6, TRAF7, WDR81, WDR82, DMWD, LLGL1, LLGL2, DYNC1I2, WDR25, KATNB1, AMBRA1, WDR62, CORO1A, CORO1B, FZR1, NWD1, WDR70, POC1A, LRBA, WDR18, NBEAL1, NBEAL2, LRWD1, WDR12, STXBP5L, BOP1, TBL3, ATG16L2, DMXL1, ERCC8	2265	259	23108	1.93015	0.0132002	0.00110733	0.0010862
UP_SEQ_FEATURE	DOMAIN:Sema	13	0.463954	2.63794e-05	SEMA5A, PLXND1, SEMA4D, SEMA4B, SEMA3A, SEMA4C, SEMA3G, SEMA3E, MST1R, PLXNA1, PLXNB2, PLXNB1, PLXNA4	2265	32	23108	4.14465	0.0299579	0.00233965	0.00229501
GOTERM_CC_DIRECT	GO:0005829~cytosol	325	11.5989	2.74246e-11	IPO11, NUDT1, STMN3, CDC20, PREX1, ALKBH5, CCDC91, FLAD1, RPS6KA1, LONP1, TBC1D10C, PIP4K2C, SNRPD3, FBXO7, TNS3, RNF111, TBC1D10A, C18H15ORF39, FAAP100, CDK5RAP2, MEF2A, PRKCI, ACOT7, PRKCE, PRKCD, AP1B1, PRKCA, WDR73, MYO7A, ACTN4, PASK, UPB1, SND1, UNC13D, NISCH, RNF123, CDC34, WDR81, DXO, ULK1, PRKD2, NHLRC2, PRKD1, VPS28, TELO2, LLGL2, CASZ1, ZNF395, FLII, STXBP1, NAIF1, XPC, WDR62, PIK3R1, …	1859	2278	18304	1.40474	1.9115e-08	1.91149e-08	1.89778e-08
GOTERM_CC_DIRECT	GO:0005737~cytoplasm	295	10.5282	6.30633e-08	PANK4, MAPKBP1, IPO11, RNH1, HDAC10, CCNF, STMN3, WDR83, NADSYN1, NUBP2, ENDOU, DPYSL4, RPS6KA1, ANKS1A, CDK5RAP2, DYNC2H1, PRKCE, PRKCD, MYO7B, TALDO1, PRKCA, MYO7A, MAPK8IP2, JMJD7, MAPK8IP3, SND1, RNF126, BIN3, KATNAL2, PRKD2, PRKD1, TTLL12, NEIL1, ANKK1, RIN1, PADI1, AARS2, GGNBP2, AIRE, PADI6, PHYHIPL, IQGAP3, ARPP19, PPL, EVPL, BRIP1, RIC8B, TERT, MAP2, CFAP69, MAP6, SCN3A, HEXIM1, HEXIM2, …	1859	2178	18304	1.33362	4.39541e-05	1.76876e-05	1.75607e-05
GOTERM_CC_DIRECT	GO:0005581~collagen trimer	23	0.820842	7.61303e-08	COL28A1, COLEC11, COL18A1, COL26A1, COL27A1, COL16A1, COL24A1, COL11A1, COL22A1, COL11A2, SFTPD, COL1A1, COL3A1, COL5A1, COL4A4, COL7A1, COL6A2, COL4A3, COL8A2, COL6A6, COL9A3, COL9A2, CTHRC1	1859	62	18304	3.65261	5.30614e-05	1.76876e-05	1.75607e-05
GOTERM_CC_DIRECT	GO:0005654~nucleoplasm	250	8.9222	1.83077e-05	MAPKBP1, IPO11, SMARCB1, GLDC, CDC20, CCDC91, RPS19, CREB3L4, RPS6KA1, HOXA3, LONP1, CDK20, DPF3, PIP4K2C, SOX6, FBXO7, FAAP100, MEF2A, STARD3, ACOT7, HSD11B1L, NISCH, XRN2, DXO, PRKD2, NEIL1, BLZF1, CASZ1, PRKDC, FLII, STXBP1, NAIF1, XPC, ABCB8, RNPC3, MRPL10, BRIP1, RNF216, NUP85, PRDM16, HLTF, HOXC5, SYMPK, PIP5K1C, ZBTB7B, HOXC9, RAB11FIP3, HOXC8, GSDMD, ZRANB3, PHC2, XRCC4, SS18L1, NCAPH2, C…	1859	1922	18304	1.28072	0.0126795	0.00319012	0.00316724
GOTERM_MF_DIRECT	GO:0005524~ATP binding	222	7.92291	3.0452e-09	PANK4, PI4K2B, EIF4A1, DNHD1, NADSYN1, NUBP2, UBE2L3, FLAD1, RPS6KA1, LONP1, PDK4, CDK20, PIP4K2C, KIF21B, DYNC2H1, EPHA7, PRKCI, EPHA8, PRKCE, PRKCD, STARD9, MYO7B, PRKCA, MYO7A, PASK, CDC34, KATNAL2, ULK1, PRKD2, PRKD1, ANKK1, EPHA1, EPHA2, RTEL1, AARS2, PRKDC, ABCB8, MST1R, ABCB9, ARPP19, BRIP1, HLTF, PIP5K1C, N4BP2, ZRANB3, PLK3, DNAH11, SRMS, DMPK, XRCC3, DNAH14, MYO5A, PTK6, DCLK1, UCK2, PP…	1759	1472	17002	1.45774	3.47761e-06	3.47762e-06	3.44107e-06
GOTERM_MF_DIRECT	GO:0005096~GTPase activator activity	41	1.46324	1.49852e-08	RGS18, RABGAP1, NPRL2, RAP1GDS1, ARHGAP1, AGAP1, AGAP3, ARHGAP15, ARHGAP44, SIPA1L1, CHN1, EVI5, TBC1D15, GIT1, AGFG1, GIT2, RALBP1, RABGAP1L, STARD13, RALGAPA1, TBCD, TSC2, TBC1D2B, MYO9B, RANGAP1, ARHGAP26, MYO9A, ARFGAP1, ARFGAP2, ARHGAP33, ACAP3, ACAP2, ACAP1, TBC1D4, DLC1, NF1, PGAM5, RGS12, PLCB1, DEPDC5, RIN1	1759	151	17002	2.62447	1.71129e-05	8.55654e-06	8.46662e-06
GOTERM_MF_DIRECT	GO:0008017~microtubule binding	44	1.57031	5.69283e-07	CCDC187, SPEF1, CETN3, KATNB1, CAMSAP1, JAKMIP3, FTCD, KLC3, KIF19, MAP2, KIF5C, CCDC181, KIF13B, MAP6, KIF1A, KIF21B, GAS2L1, LZTS1, MAP9, CDK5RAP2, APC2, SGIP1, STARD9, KIF25, KIF22, CFAP157, KIF7, KIF6, PEX14, RAB11A, CAMSAP3, CCDC88A, CENPE, KIFC2, FAM161A, KIF26A, KATNAL2, FES, KIF16B, GAS2, TUBGCP6, KIFC3, CCDC66, MDM1	1759	190	17002	2.23838	0.00064991	0.000216707	0.00021443
GOTERM_MF_DIRECT	GO:0005509~calcium ion binding	109	3.89008	3.66695e-06	DGKB, CALML6, CIB2, GUCA1C, CALML4, CDH9, CDH6, RAB44, HMCN2, SVEP1, PLS1, UNC13C, CUBN, S100A1, ANXA10, ACTN4, HSPG2, MELK, PADI1, FBN2, FBN3, NECAB3, NOTCH1, PADI6, CABP4, PROZ, PCDH15, CABP2, LTBP3, ARPP19, PCDH18, PCDH17, TPO, SCUBE1, S100A16, CDH23, MYL10, OTOF, RAB11FIP3, JAG1, SYT1, LRP1B, AIF1L, BMP1, PLCH2, FAT4, RYR2, FKBP10, SNED1, CETN3, EFCAB3, LPCAT1, DOC2B, EFCAB8, ADGRE2, ADGRE5, …	1759	681	17002	1.54708	0.00417891	0.00095121	0.000941215
GOTERM_MF_DIRECT	GO:0005085~guanyl-nucleotide exchange factor activity	44	1.57031	4.16467e-06	DENND1C, DOCK4, ARHGEF25, DENND1A, DOCK7, KNDC1, ARHGEF10L, FGD2, PREX1, MCF2L, RASGEF1C, EPS8L1, FNIP1, RALGDS, SBF2, RALGPS2, PSD, ARFGEF1, ARHGEF11, FARP2, FARP1, PLEKHG2, DENND4A, ARHGEF17, PLEKHG5, GBF1, DENND4C, IQSEC3, HPS1, ARHGEF16, ARHGEF19, RAB3IL1, VAV2, BCR, CCDC88A, RABIF, OBSCN, RAPGEF1, ARHGEF1, SMCR8, DENND6A, DOCK2, RGL2, MON1A	1759	204	17002	2.08476	0.00474477	0.00095121	0.000941215
KEGG_PATHWAY	oas04360:Axon guidance	47	1.67737	1.54925e-08	SEMA5A, CAMK2B, ROBO2, CAMK2D, SEMA3A, CAMK2A, SEMA3G, PARD6G, SEMA3E, PIK3R2, PIK3R1, GNAI1, NTN3, ROBO1, ABLIM2, PLCG2, SLIT1, PLXNA1, MAPK1, PAK6, SLIT3, SRGAP3, CAMK2G, NEO1, PLXNA4, PAK4, EPHA7, TRPC6, UNC5A, SEMA4D, EPHA8, PDPK1, UNC5B, SEMA4B, TRPC1, LIMK1, SEMA4C, PRKCA, UNC5D, SSH2, SSH3, PIK3CA, FES, PLXNB2, PLXNB1, EPHA1, EPHA2	939	181	8708	2.40809	5.06603e-06	5.06604e-06	4.49282e-06
KEGG_PATHWAY	oas04510:Focal adhesion	46	1.64168	1.53087e-06	LAMA5, LAMA2, SHC1, LAMC3, FLT4, PXN, PIK3R2, PIK3R1, MYLK3, ACTG1, MYLK4, CRKL, CCND1, PDGFD, ERBB2, MAPK1, PAK6, MYL10, FLNB, FLNC, PIP5K1C, PAK4, PPP1R12A, PDPK1, HGF, ITGA1, PRKCA, PARVB, ACTN4, PPP1CA, VAV2, COL1A1, MAPK10, PARVG, PIK3CA, ITGA10, COL4A4, COL6A2, COL4A3, RAPGEF1, ZYX, ITGA8, ITGA7, COL6A6, COL9A3, COL9A2	939	203	8708	2.10143	0.000500469	0.000250297	0.000221976
KEGG_PATHWAY	oas04020:Calcium signaling pathway	46	1.64168	0.000119381	CAMK2B, RYR2, CAMK2D, PDE1A, FLT4, CAMK2A, ATP2A3, ITPR2, CALML4, CACNA1C, MST1R, FGF3, MYLK3, CACNA1G, MYLK4, CACNA1I, HTR6, GRM5, PHKG1, ERBB4, TBXA2R, PDGFD, GNA11, ERBB2, PLCG2, CACNA1S, CAMK2G, CAMK1D, NOS3, HGF, TNNC1, SPHK1, MST1, PRKCA, TPCN2, TPCN1, FGF17, ITPKC, P2RX6, P2RX5, ADORA2A, P2RX2, PLCB1, FGFR3, MCU, PLCD1	939	239	8708	1.7849	0.0382878	0.0130126	0.0115402
KEGG_PATHWAY	oas04070:Phosphatidylinositol signaling system	24	0.856531	0.000193074	PI4K2B, DGKD, DGKB, IPMK, ITPK1, ITPR2, PIK3C2G, PIK3R2, PRKCA, CALML4, PIK3R1, ITPKC, INPP5A, PIK3CA, INPP5D, DGKQ, INPP5E, PLCG2, PIP4K2C, PIP5K1C, IP6K1, PLCB1, PLCD1, IP6K3	939	97	8708	2.29452	0.0611891	0.0157838	0.0139979
KEGG_PATHWAY	oas04925:Aldosterone synthesis and secretion	23	0.820842	0.000440642	CAMK2B, ATF2, CAMK2D, DAGLA, CAMK1D, KCNK9, PRKCE, PDE2A, CAMK2A, ITPR2, PRKCA, CALML4, CACNA1C, CACNA1G, NR4A1, CACNA1I, CREB3L4, GNA11, PRKD2, PRKD1, CACNA1S, PLCB1, CAMK2G	939	96	8708	2.22182	0.134218	0.028818	0.0255572
KEGG_PATHWAY	oas00562:Inositol phosphate metabolism	19	0.678087	0.000674024	PI4K2B, MIOX, ISYNA1, IPMK, ITPK1, PIK3C2G, ITPKC, INPP5A, PIK3CA, INPP5D, PIP5KL1, INPP5E, PLCG2, INPP5J, PLCH2, PIP4K2C, PIP5K1C, PLCB1, PLCD1	939	74	8708	2.38108	0.197866	0.0367343	0.0325778
KEGG_PATHWAY	oas05412:Arrhythmogenic right ventricular cardiomyopathy	19	0.678087	0.000944482	RYR2, LAMA2, LEF1, ITGA1, ATP2A3, CACNA1C, CACNA2D4, ACTG1, CACNB1, SGCD, ITGA10, LMNA, ITGA8, ITGA7, CTNNA3, DSG2, CACNA1S, CACNG3, CACNG5	939	76	8708	2.31842	0.265813	0.0430175	0.0381501
KEGG_PATHWAY	oas05205:Proteoglycans in cancer	39	1.39186	0.00105242	CAMK2B, CD63, CAMK2D, HPSE2, PXN, CAMK2A, ITPR2, PIK3R2, PIK3R1, HOXD10, ACTG1, CCND1, ERBB4, ERBB2, PLCG2, MAPK1, FLNB, FLNC, WNT1, CAMK2G, WNT10B, PPP1R12A, PDPK1, HGF, WNT7B, FZD6, RRAS2, ANK2, PRKCA, NUDT16L1, ESR1, HSPG2, MAPK12, PPP1CA, VAV2, COL1A1, PIK3CA, RPS6KB2, ARHGEF1	939	212	8708	1.70601	0.291299	0.0430175	0.0381501
KEGG_PATHWAY	oas04012:ErbB signaling pathway	20	0.713776	0.00124951	CAMK2B, STAT5B, CAMK2D, SHC1, CAMK2A, PIK3R2, PRKCA, PIK3R1, CRKL, MAPK10, PIK3CA, NRG3, ERBB4, RPS6KB2, ERBB2, PLCG2, MAPK1, PAK6, CAMK2G, PAK4	939	84	8708	2.20802	0.335584	0.045399	0.0402621
KEGG_PATHWAY	oas04270:Vascular smooth muscle contraction	28	0.999286	0.00146338	CALCRL, PLA2G3, ITPR2, ADM, CALML4, CACNA1C, MYLK3, MYLK4, GNA11, GNA12, MAPK1, CACNA1S, PRKG1, ARHGEF11, PLA2G2F, GUCY1A2, PLA2G2D, PPP1R12A, PLA2G4B, PRKCE, PRKCD, PRKCA, PPP1CA, ADORA2A, ADM2, ARHGEF1, PLCB1, RAMP1	939	138	8708	1.88162	0.380521	0.0469735	0.0416585
KEGG_PATHWAY	oas05223:Non-small cell lung cancer	18	0.642398	0.00158015	ALK, STAT5B, PDPK1, HGF, PIK3R2, PRKCA, PIK3R1, DDB2, RXRB, CCND1, PIK3CA, KIF5C, ERBB2, PLCG2, E2F1, MAPK1, BAK1, RXRG	939	73	8708	2.28666	0.403763	0.0469735	0.0416585

## Sheet: Supplementary Table S7
Supplementary Table S7. Overlaps between all detected CNVRs of the 695 old sheep and previously reported QTLs.
Traits	Chromosome	CNVRs		QTLs
		Region start	Region end	QTL start	QTL end	Traits
Disease resistance trait	13	60253305	60263666	60153988	60283296	Bovine spongiform encephalopathy susceptibility QTL (13839)
	21	37292521	37954664	34958457	43962908	Change in eosinophil number QTL (14157)
	21	38076944	38545804	34958457	43962908	Change in eosinophil number QTL (14157)
	26	26231501	26299129	26242358	26366260	Change in hematocrit QTL (19795)
	3	132921573	132950409	132900737	133048932	Change in hematocrit QTL (57498)
	9	8850275	9520940	7006158	17962597	Fecal egg count QTL (16026)
	3	170838368	170854424	170734768	170882962	Fecal egg count QTL (57499)
	1	110572272	110619181	110569175	110738551	Haemonchus contortus FEC QTL(12937)
	3	219960766	220001606	219972357	220120552	Haemonchus contortus FEC QTL(12939)
	3	220040195	220341455	219972357	220120552	Haemonchus contortus FEC QTL(12939)
	3	218449086	218613500	218453365	218601559	Haemonchus contortus FEC QTL(12940)
	25	13751175	13769001	13633256	13765682	Haemonchus contortus FEC QTL(12960)
	18	48203703	49204046	41300490	49560588	Haemonchus contortus FEC QTL(12965)
	26	26231501	26299129	26242358	26366260	Haemonchus contortus FEC QTL(19796)
	26	26231501	26299129	26242358	26366260	Haemonchus contortus FEC QTL(19814)
	20	25725119	25771701	25759762	25861963	Maedi-Visna virus susceptibility QTL (13864)
	20	25787104	25938002	25759762	25861963	Maedi-Visna virus susceptibility QTL (13864)
	3	138476640	138487670	138339472	138487666	Nematodirus FEC QTL (17184)
	3	183643526	183754229	182553271	184479798	Nematodirus FEC QTL (17188)
	3	183886109	184149419	182553271	184479798	Nematodirus FEC QTL (17188)
	20	25725119	25771701	25759762	25861963	ovine pulmonary adenocarcinoma susceptibility QTL (13865)
	20	25787104	25938002	25759762	25861963	ovinepulmonary adenocarcinoma susceptibility QTL (13865)
	20	25725119	25771701	25759762	25861963	ovinepulmonary adenocarcinoma susceptibility QTL (13866)
	20	25787104	25938002	25759762	25861963	ovinepulmonary adenocarcinoma susceptibility QTL (13866)
	20	25725119	25771701	25759762	25861963	ovinepulmonary adenocarcinoma susceptibility QTL (13867)
	20	25787104	25938002	25759762	25861963	ovinepulmonary adenocarcinoma susceptibility QTL (13867)
	21	37292521	37954664	26483680	38401336	Salmonella abortusovis susceptibility QTL (17196)
	13	60253305	60263666	60153988	60283296	scrapie susceptibility QTL (13840)
	13	60253305	60263666	60153988	60283296	scrapie susceptibility QTL (13841)
	6	10920826	10943250	10795454	10945599	scrapie susceptibility QTL (13979)
	22	49749610	50523596	35343961	50780146	scrapie susceptibility QTL (13983)
	3	192780758	192791339	192674949	192823143	Strongyle FEC QTL (17183)
	3	155655309	155747997	155559661	155707856	Strongyle FEC QTL (17189)
	11	22945059	22959933	22905474	23018923	Trichostrongylus colubriformis FEC QTL (12888)
	18	67592860	68362327	68301355	68408629	Trichostrongylus colubriformis FEC QTL (13823)
	26	26231501	26299129	26242358	26366260	Worm count QTL (19797)
	22	9619132	9727143	9512854	9635364	Worm count QTL (19807)
	26	26231501	26299129	26242358	26366260	Worm count QTL (19815)
	26	26231501	26299129	26242358	26366260	Worm length QTL (19798)
Reproductive trait	5	40923450	41044494	40908479	41044207	Ovulation Rate QTL (14160)
	5	38883600	39026117	38906488	39076148	Ovulation Rate QTL (31315)
	10	41967211	44397422	24137316	62067384	Testes weight QTL (12923)
	17	21372997	22147114	16617732	27455383	Reproductive seasonality QTL (16608)
	17	23749165	24703505	16617732	27455383	Reproductive seasonality QTL (16608)
	17	21372997	22147114	16617732	27455383	Reproductive seasonality QTL (16609)
	17	23749165	24703505	16617732	27455383	Reproductive seasonality QTL (16609)
	17	21372997	22147114	16617732	27455383	Reproductive seasonality QTL (16610)
	17	23749165	24703505	16617732	27455383	Reproductive seasonality QTL (16610)
	17	21372997	22147114	16617732	27455383	Reproductive seasonality QTL (16611)
	17	23749165	24703505	16617732	27455383	Reproductive seasonality QTL (16611)
	20	119119	840479	0	14308140	Testes weight QTL (12927)
Body size and meat and growth related trait	1	218403846	218439225	218301288	218470665	Abdominal fat weight QTL (19681)
	1	253277110	253288285	253252191	253421568	Body weight (20weeks) QTL (13701)
	1	68636064	68666651	68623010	68792387	Body weight (43weeks) QTL (13921)
	1	131004079	131790731	121612542	133892360	bone density QTL (13675)
	1	132224765	133049786	121612542	133892360	bone density QTL (13675)
	1	131004079	131790731	121612542	133892360	bone density QTL (13676)
	1	132224765	133049786	121612542	133892360	bone density QTL (13676)
	1	131004079	131790731	121612542	133892360	bone density QTL (13677)
	1	132224765	133049786	121612542	133892360	bone density QTL (13677)
	1	218403846	218439225	218301288	218470665	Carcass length QTL(19680)
	1	218403846	218439225	218301288	218470665	cholesterol level (total) QTL (19679)
	1	218403846	218439225	218301288	218470665	Hot carcass weight QTL (19678)
	2	98510539	98525061	98464944	98622918	Body weight (8weeks) QTL (13694)
	2	78742260	79069093	76854156	80961470	Body weight (birth) QTL (14171)
	2	198085585	199556459	178273207	207261363	Body weight (slaughter) QTL (14254)
	2	198085585	199556459	178273207	207261363	Hot carcass weight QTL (14253)
	2	136925021	136933722	136813036	136971009	Leg fat weight QTL (13740)
	2	168301669	168439570	168328769	168486743	Longissimus muscle area QTL (13720)
	2	168301669	168439570	168328769	168486743	Longissimus muscle area QTL (13719)
	2	122814813	123060127	123014042	123172015	Longissimus muscle area QTL (13723)
	2	123073808	123139766	123014042	123172015	Longissimus muscle area QTL (13723)
	2	137003422	137013389	137002604	137160578	Longissimus muscle area QTL (13729)
	2	137003422	137013389	137002604	137160578	Longissimus muscle width QTL (13726)
	2	122814813	123060127	123014042	123172015	Semitendinosus muscle weight QTL (13733)
	2	123073808	123139766	123014042	123172015	Semitendinosus muscle weight QTL (13733)
	2	137003422	137013389	137002604	137160578	Soft tissue depth at GR site QTL (13724)
	2	99257093	99318393	99254812	99412786	Subcutaneous fat thickness QTL (13688)
	2	99257093	99318393	99254812	99412786	Subcutaneous fat thickness QTL (13692)
	3	180777370	180789475	180700841	180849036	Body weight (20weeks) QTL (17186)
	3	180831319	180941051	180700841	180849036	Body weight (20weeks) QTL (17186)
	3	207627488	207652986	207605534	207753729	Body weight (8weeks) QTL (13716)
	3	87967374	88270567	88086751	88234945	Muscle depth at third lumbar QTL (13693)
	3	185984440	186017718	185887645	186035840	Subcutaneous fat thickness QTL (13698)
	6	4601375	5439243	1951890	13663231	Carcass fat percentage QTL (14257)
	6	4601375	5439243	1951890	13663231	internal fat amount QTL (14256)
	6	4601375	5439243	4541898	4692043	Muscle depth at third lumbar QTL (13708)
	6	78318499	79954805	73946609	102849599	Useful yield content QTL (14011)
	7	50832790	51121174	49688047	52107417	Average daily gain QTL (13972)
	5	40923450	41044494	40908479	41044207	Total lambs born QTL (13837)
	5	40923450	41044494	40908479	41044207	Total lambs born QTL (13838)
	5	40923450	41044494	40908479	41044207	Total lambs born QTL (14159)
	5	40923450	41044494	40908479	41044207	Total lambs born QTL (14170)
	5	40923450	41044494	40908479	41044207	Total lambs born QTL (14247)
	5	38883600	39026117	38906488	39076148	Total lambs born QTL (31314)
	7	24923001	24945825	24901307	25036090	Shoulder yield QTL (65999)
	7	24994798	25026035	24901307	25036090	Shoulder yield QTL (65999)
	10	71771323	72183447	71722310	76118750	Carcass fat percentage QTL (14265)
	10	71771323	72183447	71722310	76118750	fat weight incarcass QTL (14264)
	10	71771323	72183447	71722310	76118750	Lean meat yield percentage QTL (14266)
	14	42833965	42916179	42845320	42950566	Body weight (birth) QTL (13781)
	14	8970	593345	0	9261577	Extension QTL (12911)
	14	7595229	7635190	7535556	7640801	fat weight incarcass QTL (14303)
	18	48203703	49204046	47576019	49560588	Carcass fat percentage QTL (14326)
	18	49456102	49675199	47576019	49560588	Carcass fat percentage QTL (14326)
	18	50747854	52035059	51276972	56587035	Muscle depth at third lumbar QTL (14235)
	18	50747854	52035059	51276972	56587035	Muscle depth at third lumbar QTL (14237)
	20	29615543	29799444	28462978	30455898	Average daily gain QTL (13790)
	20	29615543	29799444	28462978	30455898	Body weight (16weeks) QTL (13783)
	20	29615543	29799444	28462978	30455898	Body weight QTL (13788)
	25	2009972	2647990	1589112	6886152	Primary fiber diameter coefficient of variance QTL (12915)
	25	2009972	2647990	0	10858931	Staple length QTL (12919)
	20	26400157	26425308	26367858	26470059	Subcutaneous fat thickness QTL (13691)
	20	26428559	26463701	26367858	26470059	Subcutaneous fat thickness QTL (13691)
	20	29615543	29799444	28462978	30455898	Maximum daily gain QTL (13784)
	26	26231501	26299129	26242358	26366260	Body weight QTL (19794)
Milk related trait	1	193829523	193839074	193809403	193978780	Milk protein yield QTL (13910)
	2	82429076	82467940	82359536	82517509	Milk fat percentage QTL (13914)
	3	54167095	55155000	49200540	58907274	Milk fat persistency QTL (16013)
	3	210877033	210932492	210739846	210888040	Milk protein percentage QTL (13908)
	6	9451883	9694129	9384087	9534232	Milk fat percentage QTL (13816)
	6	92165230	92213659	92024115	92174261	Milk protein percentage QTL (13822)
	6	97639852	97684257	97564480	97714626	Milk protein yield QTL (13673)
	6	97639852	97684257	97564480	97714626	Milk Yield QTL (13672)
	11	52250944	52277364	52220850	52334300	Milk capric acid content QTL (13897)
	13	18972321	19267350	18969454	19098762	Milk cis-10 heptadecenoic acid content QTL (14229)
	15	65017	1058533	0	11941299	udder shape QTL (13659)
	16	30614297	30695539	30556339	30725626	Milk butyric acid content QTL (14196)
	16	30614297	30695539	30556339	30725626	Milk butyric acid content QTL (14197)
	16	30614297	30695539	30556339	30725626	Milk fat percentage QTL (14194)
	16	30614297	30695539	30556339	30725626	Milk fat percentage QTL (14195)
	16	30614297	30695539	30556339	30725626	Milk linoleic acid content QTL (14199)
	16	30614297	30695539	30556339	30725626	Milk stearic acid content QTL (14198)
	25	2854589	2926836	2814052	2946478	Milk fat yield QTL (13919)
	25	2854589	2926836	2814052	2946478	Milk fat yield QTL (13920)
Wool related trait	3	21278834	21316399	20673118	21414090	Greasy fleece weight QTL (12912)
	11	38380935	38420653	38345964	38969937	Fiber diameter coefficient of variance QTL (17237)
	11	40075988	40119901	39973966	40087416	Fleece yield QTL (17241)
	11	40075988	40119901	39973966	40087416	Greasy fleece weight QTL (17239)
	11	45335705	45344832	45238028	45351477	Greasy fleece weight QTL (17240)

## Sheet: Supplementary Table S8
Supplementary Table S8. Overlaps between selective CNVs identified by ecological association tests and previously reported QTLs .
Traits	Chromosome	CNVs		QTLs
		Region start	Region end	QTL start	QTL end	Traits
Disease resistance trait	1	78968980	79169686	67801533	83900797	Immunoglobulin A level QTL (13986)
	11	49565375	49629452	48783328	55023056	Salmonella abortusovis susceptibility QTL (17197)
	25	18142248	18547204	18533018	18665444	Worm count QTL (19811)
	25	18142248	18547204	18533018	18665444	Worm count QTL (19810)
	3	164011600	164159900	154863148	166792797	Strongyle FEC QTL (12891)
	3	219970540	219981304	219972357	220120552	Haemonchus contortus FEC QTL (12939)
	21	41984078	42773808	34958457	43962908	Change in eosinophil number QTL (14157)
	1	262818152	263558472	210704739	273712908	Trichostrongylus colubriformis FEC QTL (12884)
	22	49712254	50377777	35343961	50780146	scrapie susceptibility QTL (13983)
Body size and meat and growth related trait	1	158581482	158895912	133892360	163533300	Carcass bone percentage QTL (14322)
	18	49493520	49526020	47576019	49560588	Carcass fat percentage QTL (14326)
	19	58549935	58630595	55647012	59687944	internal fat amount QTL (14328)
	19	58933656	58983047	55647012	59687944	internal fat amount QTL (14328)
	19	59551810	59598793	55647012	59687944	internal fat amount QTL (14328)
	20	26400157	26406137	26367858	26470059	Subcutaneous fat thickness QTL (13691)
	25	18142248	18547204	3707927	18605853	Useful yield content QTL (14013)
	6	3232419	3412650	1951890	13663231	internal fat amount QTL (14256)
	6	3232419	3412650	1951890	13663231	Carcass fat percentage QTL (14257)
	16	69228726	70108247	1692872	75502091	Dressing percentage QTL (14305)
	16	69228726	70108247	56795855	72708852	Lean meat yield percentage QTL (14272)
	19	58987471	60169432	55647012	59687944	internal fat amount QTL (14328)
	21	41984078	42773808	0	58264096	Meat linolenic acid content QTL (17211)
	21	41984078	42773808	0	66209200	Meat palmitic acid content QTL (17202)
	21	41984078	42773808	0	56277820	Meat linoleic acid content QTL (17209)
	21	41984078	42773808	0	59588280	Meat oleic acid content QTL (17205)
	21	41984078	42773808	0	47670624	Meat arachidonic acid content QTL (17212)
	21	41984078	42773808	0	56277820	Meat stearic acid content QTL (17203)
	21	41984078	42773808	0	56277820	Meat cis-vaccenic acid content QTL (17206)
	21	41984078	42773808	3972552	66209200	Meat myristic acid content QTL (17201)
	21	41984078	42773808	0	70843844	Meat docosapentaenoic acid content QTL (17218)
	21	41984078	42773808	0	70181752	Meat gadoleic acid content QTL (17207)
	21	46919932	47922324	0	58264096	Meat linolenic acid content QTL (17211)
	21	46919932	47922324	0	66209200	Meat palmitic acid content QTL (17202)
	21	46919932	47922324	0	56277820	Meat linoleic acid content QTL (17209)
	21	46919932	47922324	0	59588280	Meat oleic acid content QTL (17205)
	21	46919932	47922324	0	47670624	Meat arachidonic acid content QTL (17212)
	21	46919932	47922324	0	56277820	Meat stearic acid content QTL (17203)
	21	46919932	47922324	0	56277820	Meatcis-vaccenic acid content QTL (17206)
	21	46919932	47922324	3972552	66209200	Meat myristic acid content QTL (17201)
	21	46919932	47922324	0	70843844	Meat docosapentaenoic acid content QTL (17218)
	21	46919932	47922324	0	70181752	Meat gadoleic acid content QTL (17207)

## Sheet: Supplementary Table S9
Supplementary Table S9. The spatial analysis method (Samβada) identifies 37 CNVs associated with the environmental variables.
CNV marker	Allele type	Climatic parameters	WaldScore
chr1:132698414-132719151	Hemizygous deletion	FRS-September	38.1517
chr1:132698414-132719151	Hemizygous deletion	PR-February	37.3819
chr1:132698414-132719151	Hemizygous deletion	FRS-April	35.0997
chr1:132698414-132719151	Hemizygous deletion	FRS-May	34.2818
chr1:239185878-239256562	Hemizygous deletion	REH-September	143.583
chr1:239185878-239256562	Hemizygous deletion	REH-August	141.064
chr1:239185878-239256562	Hemizygous deletion	REH-July	140.416
chr1:239185878-239256562	Hemizygous deletion	SUN-June	129.558
chr1:239185878-239256562	Hemizygous deletion	REH-October	126.888
chr1:239185878-239256562	Hemizygous deletion	SUN-September	126.312
chr1:239185878-239256562	Hemizygous deletion	DTR-September	125.526
chr1:239185878-239256562	Hemizygous deletion	REH-June	123.127
chr1:239185878-239256562	Hemizygous deletion	RDO-July	122.066
chr1:239185878-239256562	Hemizygous deletion	REH-Yearly-Mean	121.041
chr1:239185878-239256562	Hemizygous deletion	DTR-August	118.844
chr1:239185878-239256562	Hemizygous deletion	DTR-July	116.137
chr1:239185878-239256562	Hemizygous deletion	RDO-August	115.683
chr1:239185878-239256562	Hemizygous deletion	RDO-September	114.308
chr1:239185878-239256562	Hemizygous deletion	SUN-July	111.808
chr1:239185878-239256562	Hemizygous deletion	DTR-June	111.037
chr1:239185878-239256562	Hemizygous deletion	DTR-October	110.56
chr1:239185878-239256562	Hemizygous deletion	SUN-August	110.072
chr1:239185878-239256562	Hemizygous deletion	DTR-Yearly-Mean	108.505
chr1:239185878-239256562	Hemizygous deletion	REH-November	104.482
chr1:239185878-239256562	Hemizygous deletion	PR-August	101.101
chr1:239185878-239256562	Hemizygous deletion	PR-July	100.346
chr1:239185878-239256562	Hemizygous deletion	RDO-June	98.861
chr1:239185878-239256562	Hemizygous deletion	PR-September	98.1379
chr1:239185878-239256562	Hemizygous deletion	DTR-November	97.7483
chr1:239185878-239256562	Hemizygous deletion	WND-November	93.0197
chr1:239185878-239256562	Hemizygous deletion	SUN-October	92.5293
chr1:239185878-239256562	Hemizygous deletion	SUN-Yearly-Mean	92.2465
chr1:239185878-239256562	Hemizygous deletion	WND-October	91.7572
chr1:239185878-239256562	Hemizygous deletion	PR-June	89.7018
chr1:239185878-239256562	Hemizygous deletion	WND-December	82.9882
chr1:239185878-239256562	Hemizygous deletion	DTR-May	81.9094
chr1:239185878-239256562	Hemizygous deletion	WND-January	81.645
chr1:239185878-239256562	Hemizygous deletion	WND-May	81.3129
chr1:239185878-239256562	Hemizygous deletion	WND-Yearly-Mean	81.0275
chr1:239185878-239256562	Hemizygous deletion	WND-February	79.1402
chr1:239185878-239256562	Hemizygous deletion	SUN-May	76.2709
chr1:239185878-239256562	Hemizygous deletion	WND-April	76.1954
chr1:239185878-239256562	Hemizygous deletion	REH-May	75.9574
chr1:239185878-239256562	Hemizygous deletion	RDO-Yearly-Mean	73.0024
chr1:239185878-239256562	Hemizygous deletion	PRCV-Yearly-Mean	72.7949
chr1:239185878-239256562	Hemizygous deletion	WND-March	71.0932
chr1:239185878-239256562	Hemizygous deletion	SUN-Novemebr	70.5272
chr1:239185878-239256562	Hemizygous deletion	RDO-October	70.0588
chr1:239185878-239256562	Hemizygous deletion	WND-September	69.4218
chr1:239185878-239256562	Hemizygous deletion	DTR-April	67.8443
chr1:239185878-239256562	Hemizygous deletion	WND-June	67.124
chr1:239185878-239256562	Hemizygous deletion	REH-March	66.8267
chr1:239185878-239256562	Hemizygous deletion	REH-April	65.8371
chr1:239185878-239256562	Hemizygous deletion	RDO-November	64.6249
chr1:239185878-239256562	Hemizygous deletion	REH-December	63.89
chr1:239185878-239256562	Hemizygous deletion	DTR-December	61.3838
chr1:239185878-239256562	Hemizygous deletion	DTR-March	61.2309
chr1:239185878-239256562	Hemizygous deletion	TMP-September	58.4228
chr1:239185878-239256562	Hemizygous deletion	TMP-July	56.7585
chr1:239185878-239256562	Hemizygous deletion	TMP-August	55.08
chr1:239185878-239256562	Hemizygous deletion	DTR-February	53.5595
chr1:239185878-239256562	Hemizygous deletion	SUN-December	51.9588
chr1:239185878-239256562	Hemizygous deletion	SUN-April	49.8996
chr1:239185878-239256562	Hemizygous deletion	PR-October	49.7724
chr1:239185878-239256562	Hemizygous deletion	SUN-February	48.2154
chr1:239185878-239256562	Hemizygous deletion	DTR-January	47.1338
chr1:239185878-239256562	Hemizygous deletion	REH-February	46.3135
chr1:239185878-239256562	Hemizygous deletion	SUN-January	45.5616
chr1:239185878-239256562	Hemizygous deletion	PRCV-June	45.3478
chr1:239185878-239256562	Hemizygous deletion	SUN-March	42.9283
chr1:239185878-239256562	Hemizygous deletion	TMP-June	40.9448
chr1:239185878-239256562	Hemizygous deletion	REH-January	39.8045
chr1:239185878-239256562	Hemizygous deletion	RDO-December	38.396
chr1:239185878-239256562	Hemizygous deletion	PRCV-July	38.0417
chr1:239185878-239256562	Hemizygous deletion	TMP-October	35.7288
chr1:34487159-34503450	Homozygous deletion	DTR-November	58.1261
chr1:34487159-34503450	Homozygous deletion	DTR-December	56.483
chr1:34487159-34503450	Homozygous deletion	DTR-February	53.7935
chr1:34487159-34503450	Homozygous deletion	DTR-January	49.3806
chr1:34487159-34503450	Homozygous deletion	DTR-March	48.5498
chr1:34487159-34503450	Homozygous deletion	SUN-Novemebr	47.144
chr1:34487159-34503450	Homozygous deletion	DTR-Yearly-Mean	46.8504
chr1:34487159-34503450	Homozygous deletion	REH-December	46.7324
chr1:34487159-34503450	Homozygous deletion	REH-November	46.7237
chr1:34487159-34503450	Homozygous deletion	SUN-December	45.6671
chr1:34487159-34503450	Homozygous deletion	REH-February	43.4078
chr1:34487159-34503450	Homozygous deletion	SUN-February	43.2312
chr1:34487159-34503450	Homozygous deletion	REH-January	42.7789
chr1:34487159-34503450	Homozygous deletion	DTR-October	41.8787
chr1:34487159-34503450	Homozygous deletion	SUN-January	41.8164
chr1:34487159-34503450	Homozygous deletion	WND-November	41.6685
chr1:34487159-34503450	Homozygous deletion	REH-Yearly-Mean	41.5491
chr1:34487159-34503450	Homozygous deletion	REH-March	41.0355
chr1:34487159-34503450	Homozygous deletion	RDO-December	39.8483
chr1:34487159-34503450	Homozygous deletion	REH-October	39.4945
chr1:34487159-34503450	Homozygous deletion	RDO-November	39.2169
chr1:34487159-34503450	Homozygous deletion	WND-October	37.8767
chr1:34487159-34503450	Homozygous deletion	DTR-April	37.2328
chr1:34487159-34503450	Homozygous deletion	RDO-January	37.1616
chr1:34487159-34503450	Homozygous deletion	WND-January	36.8549
chr1:34487159-34503450	Homozygous deletion	WND-December	35.7174
chr1:34487159-34503450	Homozygous deletion	WND-September	35.4266
chr1:34487159-34503450	Homozygous deletion	WND-Yearly-Mean	35.3682
chr1:34487159-34503450	Homozygous deletion	WND-February	34.7809
chr10:71295419-71304013	Homozygous deletion	PRCV-September	54.0274
chr10:71295419-71304013	Homozygous deletion	PRCV-October	51.3955
chr10:71295419-71304013	Homozygous deletion	PR-Yearly-Mean	50.8676
chr10:71295419-71304013	Homozygous deletion	PRCV-May	50.624
chr10:71295419-71304013	Homozygous deletion	PRCV-August	49.1223
chr10:71295419-71304013	Homozygous deletion	PRCV-April	47.2028
chr10:71295419-71304013	Homozygous deletion	TMP-February	45.6916
chr10:71295419-71304013	Homozygous deletion	TMP-January	45.303
chr10:71295419-71304013	Homozygous deletion	TMP-December	44.5422
chr10:71295419-71304013	Homozygous deletion	PRCV-July	44.4734
chr10:71295419-71304013	Homozygous deletion	PRCV-June	44.3701
chr10:71295419-71304013	Homozygous deletion	TMP-March	43.6842
chr10:71295419-71304013	Homozygous deletion	TMP-November	40.4738
chr10:71295419-71304013	Homozygous deletion	PRCV-March	39.4947
chr10:71295419-71304013	Homozygous deletion	RDO-August	36.0262
chr10:71295419-71304013	Homozygous deletion	RDO-September	34.445
chr10:71295419-71304013	Homozygous deletion	PR-September	34.1709
chr12:2305650-2309163	Homozygous deletion	WND-October	39.4259
chr12:2305650-2309163	Homozygous deletion	WND-September	37.5741
chr12:2305650-2309163	Homozygous deletion	WND-November	34.684
chr12:2305650-2309163	Homozygous deletion	WND-Yearly-Mean	34.1544
chr12:2305650-2309163	Homozygous deletion	WND-December	34.0418
chr13:54137242-54163369	Hemizygous deletion	PR-March	48.0519
chr13:54137242-54163369	Hemizygous deletion	PR-April	41.9633
chr13:54137242-54163369	Hemizygous deletion	PR-February	38.6525
chr13:54137242-54163369	Hemizygous deletion	PR-December	34.551
chr13:75373696-75381206	Duplication	WND-July	38.2846
chr13:75373696-75381206	Duplication	WND-September	34.9678
chr13:75373696-75381206	Duplication	WND-April	34.7619
chr14:3835121-3854056	Hemizygous deletion	DTR-December	42.7088
chr14:3835121-3854056	Hemizygous deletion	DTR-November	40.4393
chr14:3835121-3854056	Hemizygous deletion	PR-June	37.9622
chr14:3835121-3854056	Hemizygous deletion	TMP-Yearly-Mean	36.0801
chr14:3835121-3854056	Hemizygous deletion	SUN-May	35.9
chr14:3835121-3854056	Hemizygous deletion	TMP-April	35.2824
chr14:3835121-3854056	Hemizygous deletion	DTR-January	35.0945
chr14:3835121-3854056	Hemizygous deletion	TMP-March	34.8871
chr14:60086176-60097746	Duplication	DTR-July	34.8685
chr14:60086176-60097746	Duplication	DTR-August	34.1833
chr15:15915483-15924654	Hemizygous deletion	PRCV-September	40.6207
chr15:47427130-47451004	Homozygous deletion	WND-October	69.3571
chr15:47427130-47451004	Homozygous deletion	WND-September	68.6797
chr15:47427130-47451004	Homozygous deletion	WND-November	67.4869
chr15:47427130-47451004	Homozygous deletion	WND-December	65.7203
chr15:47427130-47451004	Homozygous deletion	DTR-April	63.863
chr15:47427130-47451004	Homozygous deletion	WND-Yearly-Mean	63.7969
chr15:47427130-47451004	Homozygous deletion	WND-January	63.1645
chr15:47427130-47451004	Homozygous deletion	TMP-May	62.6161
chr15:47427130-47451004	Homozygous deletion	RDO-November	61.9849
chr15:47427130-47451004	Homozygous deletion	DTR-Yearly-Mean	60.6817
chr15:47427130-47451004	Homozygous deletion	SUN-Yearly-Mean	60.4531
chr15:47427130-47451004	Homozygous deletion	SUN-April	58.4455
chr15:47427130-47451004	Homozygous deletion	WND-June	58.436
chr15:47427130-47451004	Homozygous deletion	TMP-June	58.3425
chr15:47427130-47451004	Homozygous deletion	WND-March	58.0421
chr15:47427130-47451004	Homozygous deletion	DTR-March	57.7658
chr15:47427130-47451004	Homozygous deletion	TMP-April	57.5018
chr15:47427130-47451004	Homozygous deletion	WND-February	57.0937
chr15:47427130-47451004	Homozygous deletion	SUN-February	57.0619
chr15:47427130-47451004	Homozygous deletion	RDO-December	56.8162
chr15:47427130-47451004	Homozygous deletion	SUN-October	56.3416
chr15:47427130-47451004	Homozygous deletion	TMP-September	56.2081
chr15:47427130-47451004	Homozygous deletion	DTR-October	55.7116
chr15:47427130-47451004	Homozygous deletion	SUN-March	55.6617
chr15:47427130-47451004	Homozygous deletion	TMP-July	55.0914
chr15:47427130-47451004	Homozygous deletion	TMP-August	54.8305
chr15:47427130-47451004	Homozygous deletion	RDO-January	54.7821
chr15:47427130-47451004	Homozygous deletion	SUN-May	54.7611
chr15:47427130-47451004	Homozygous deletion	DTR-September	54.5266
chr15:47427130-47451004	Homozygous deletion	WND-May	54.443
chr15:47427130-47451004	Homozygous deletion	DTR-February	54.2093
chr15:47427130-47451004	Homozygous deletion	RDO-February	53.0803
chr15:47427130-47451004	Homozygous deletion	WND-April	52.9348
chr15:47427130-47451004	Homozygous deletion	WND-July	51.8414
chr15:47427130-47451004	Homozygous deletion	WND-August	51.7244
chr15:47427130-47451004	Homozygous deletion	SUN-January	51.695
chr15:47427130-47451004	Homozygous deletion	RDO-Yearly-Mean	50.8873
chr15:47427130-47451004	Homozygous deletion	DTR-May	50.2762
chr15:47427130-47451004	Homozygous deletion	SUN-September	49.4327
chr15:47427130-47451004	Homozygous deletion	DTR-January	49.1552
chr15:47427130-47451004	Homozygous deletion	RDO-October	48.315
chr15:47427130-47451004	Homozygous deletion	SUN-Novemebr	48.2753
chr15:47427130-47451004	Homozygous deletion	RDO-March	47.3805
chr15:47427130-47451004	Homozygous deletion	SUN-December	47.1147
chr15:47427130-47451004	Homozygous deletion	DTR-November	45.9449
chr15:47427130-47451004	Homozygous deletion	FRS-May	44.9937
chr15:47427130-47451004	Homozygous deletion	DTR-December	44.8198
chr15:47427130-47451004	Homozygous deletion	REH-April	44.7661
chr15:47427130-47451004	Homozygous deletion	FRS-April	43.8757
chr15:47427130-47451004	Homozygous deletion	DTR-June	43.2134
chr15:47427130-47451004	Homozygous deletion	REH-Yearly-Mean	42.9141
chr15:47427130-47451004	Homozygous deletion	SUN-June	42.3322
chr15:47427130-47451004	Homozygous deletion	REH-October	41.9503
chr15:47427130-47451004	Homozygous deletion	REH-November	41.7833
chr15:47427130-47451004	Homozygous deletion	RDO-September	40.7476
chr15:47427130-47451004	Homozygous deletion	REH-March	40.539
chr15:47427130-47451004	Homozygous deletion	TMP-Yearly-Mean	40.2348
chr15:47427130-47451004	Homozygous deletion	REH-February	39.9782
chr15:47427130-47451004	Homozygous deletion	SUN-August	39.1749
chr15:47427130-47451004	Homozygous deletion	DTR-August	38.9476
chr15:47427130-47451004	Homozygous deletion	REH-September	38.7027
chr15:47427130-47451004	Homozygous deletion	PRCV-January	38.2463
chr15:47427130-47451004	Homozygous deletion	REH-January	38.144
chr15:47427130-47451004	Homozygous deletion	PR-February	38.0526
chr15:47427130-47451004	Homozygous deletion	TMP-October	37.8318
chr15:47427130-47451004	Homozygous deletion	PRCV-December	37.6427
chr15:47427130-47451004	Homozygous deletion	REH-December	37.0853
chr15:47427130-47451004	Homozygous deletion	REH-May	36.2926
chr15:47427130-47451004	Homozygous deletion	PR-November	35.8063
chr15:47427130-47451004	Homozygous deletion	PR-March	34.7467
chr15:47427130-47451004	Homozygous deletion	RDO-April	34.1201
chr15:47437051-47451004	Homozygous deletion	SUN-May	34.3883
chr15:77705030-77722375	Duplication	TMP-May	36.5599
chr15:77705030-77722375	Duplication	TMP-June	35.8844
chr15:77705030-77722375	Duplication	TMP-September	34.9788
chr15:7981945-7987239	Hemizygous deletion	REH-August	36.0993
chr15:7981945-7987239	Hemizygous deletion	REH-September	35.6737
chr16:21354659-21369847	Duplivation	REH-August	34.3318
chr17:61009451-61047834	Duplication	PRCV-October	36.8306
chr17:61009451-61047834	Duplication	PR-Yearly-Mean	36.1503
chr17:61009451-61047834	Duplication	PRCV-September	35.6982
chr18:18850643-18863416	Duplication	PRCV-Yearly-Mean	45.6741
chr18:18850643-18863416	Duplication	REH-October	43.0862
chr18:18850643-18863416	Duplication	DTR-October	42.8158
chr18:18850643-18863416	Duplication	REH-Yearly-Mean	42.1949
chr18:18850643-18863416	Duplication	DTR-November	41.8324
chr18:18850643-18863416	Duplication	PR-October	41.2138
chr18:18850643-18863416	Duplication	DTR-Yearly-Mean	39.8111
chr18:18850643-18863416	Duplication	SUN-October	39.3906
chr18:18850643-18863416	Duplication	REH-September	38.9899
chr18:18850643-18863416	Duplication	REH-June	38.4
chr18:18850643-18863416	Duplication	PR-September	38.1504
chr18:18850643-18863416	Duplication	REH-November	37.8157
chr18:18850643-18863416	Duplication	RDO-Yearly-Mean	35.6493
chr18:18850643-18863416	Duplication	RDO-October	35.2259
chr18:18850643-18863416	Duplication	DTR-September	35.2031
chr18:18850643-18863416	Duplication	REH-August	35.1472
chr18:18850643-18863416	Duplication	SUN-Yearly-Mean	34.9559
chr18:18850643-18863416	Duplication	SUN-September	34.8106
chr18:18850643-18863416	Duplication	RDO-June	34.6993
chr18:18850643-18863416	Duplication	REH-July	34.4834
chr18:18850643-18863416	Duplication	REH-May	34.4237
chr20:1761385-1772323	Hemizygous deletion	TMP-April	57.2104
chr20:1761385-1772323	Hemizygous deletion	TMP-Yearly-Mean	55.4217
[truncated: 129 more rows]

## Sheet: Supplementary Table S10
Supplementary Table S10. The candidate genes associated with climate under adaptive selection based on Wald scores (sambada analysis).
[truncated: 19 more rows]

[truncated: 9 more sheets: Supplementary Table S11, Supplementary Table S12, Supplementary Table S13, Supplementary Table S14, Supplementary Table S15, Supplementary Table S16, Supplementary Table S17, Supplementary Table S18, Supplementary Table S19]
